# Supplementary material for: Proteomic analysis of the regulatory networks of ClpX in a model cyanobacterium Synechocystis sp. PCC 6803
Source: Front Plant Sci. 2022 Sep 29;13:994056. doi: 10.3389/fpls.2022.994056 (PMC9560874; doi:10.3389/fpls.2022.994056)
Supplement: Supplementary file 2 [file Table_1.xlsx]

## Sheet: Table S1
Table S1. List of primers and condition for PCR amplification.
Primers	Sequences	Tm
clpX-AF	CCATGGAAAAACTCCAGGAA	57.4 ℃
clpX-AR	GACTCTAGAGGATCCCCAGCAGGTTTAATCTTTTG	73.9 ℃
clpX-BF	TTGAAGGATCAGATCAGCGCAATCAAGAGATTGAT	76.5 ℃
clpX-BR	AAACCTTTGTTCGATTACCTTTT	56.9 ℃
kana-F	GGATCCTCTAGAGTCGACCTG	55.3 ℃
kana-R	GATCTGATCCTTCAACTCAGCA	56.8 ℃
PCR
	PCR reaction system
	Reagent	Volume
	Hieff Canace Plus PCR Master Mix（2×）	25μL
	Template DNA	1 μL
	Primer-F(10μM)	2.5 μL
	Primer-R(10μM)	2.5 μL
	ddH2O	19μL
	Total	50 μL
	PCR reaction condition
	Temperature	Time
	95℃	5min
	95℃	10s
	Tm-5℃	20s		35cycle
	72℃	30s/Kb
	72℃	10min
	4℃	ꚙ
Fusion PCR
Step one
	PCR reaction system
	Reagent	Volume
	Hieff Canace Plus PCR Master Mix（2×）	25μL
	Template DNA	1 μL
	ddH2O	19μL
	Total	45 μL
	PCR reaction condition
	Temperature	Time
	95℃	5min
	95℃	10s
	Tm-5℃	20s		10cycle
	72℃	30s/Kb
	72℃	10min
	4℃	ꚙ
Step two
	PCR reaction system
	Reagent	Volume
	PCR product from step one	45μL
	Primer-F(10μM)	2.5 μL
	Primer-R(10μM)	2.5 μL
	Total	50 μL
	PCR reaction condition
	Temperature	Time
	95℃	5min
	95℃	10s
	Tm-5℃	20s		30cycle
	72℃	30s/Kb
	72℃	10min
	4℃	ꚙ
