# Supplementary material for: Proteomic analysis of the regulatory networks of ClpX in a model cyanobacterium Synechocystis sp. PCC 6803
Source: Front Plant Sci. 2022 Sep 29;13:994056. doi: 10.3389/fpls.2022.994056 (PMC9560874; doi:10.3389/fpls.2022.994056)
Supplement: Supplementary file 3 [file Table_2.xlsx]

## Sheet: Table S2
Table S2. Mass of targeted peptide precursors for PRM experiment.
Protein ID	Precursor ion (m/z)	Product ion (m/z)	Peptide Sequence	Transition	Charge
sll0224	629.841	888.49	IEQTGVINAGTR	y9	5
sll0224	629.841	787.442	IEQTGVINAGTR	y8	4
sll0224	629.841	631.352	IEQTGVINAGTR	y6	1
sll0224	629.841	518.268	IEQTGVINAGTR	y5	3
sll0224	617.298	359.175	LNMVEATADNR	b3	5
sll0224	617.298	875.422	LNMVEATADNR	y8	6
sll0224	617.298	776.353	LNMVEATADNR	y7	3
sll0224	617.298	647.311	LNMVEATADNR	y6	4
sll0224	853.917	272.16	TAVVDFSVSYFADGTK	b3	1
sll0224	853.917	888.41	TAVVDFSVSYFADGTK	y8	3
sll0224	853.917	638.314	TAVVDFSVSYFADGTK	y6	6
sll0224	853.917	491.246	TAVVDFSVSYFADGTK	y5	5
sll0224	853.917	420.209	TAVVDFSVSYFADGTK	y4	4
sll0224	853.917	305.182	TAVVDFSVSYFADGTK	y3	2
sll0224	909.958	905.432	IITGVDSDLESADSLAGR	y9	4
sll0224	909.958	776.39	IITGVDSDLESADSLAGR	y8	2
sll0224	909.958	618.321	IITGVDSDLESADSLAGR	y6	5
sll0224	909.958	503.294	IITGVDSDLESADSLAGR	y5	1
sll0224	600.335	242.15	AIGVIPDTTNAK	b3	1
sll0224	600.335	341.218	AIGVIPDTTNAK	b4	2
sll0224	600.335	859.452	AIGVIPDTTNAK	y8	5
sll0224	600.335	746.368	AIGVIPDTTNAK	y7	3
sll0224	600.335	534.288	AIGVIPDTTNAK	y5	4
sll0224	600.335	332.193	AIGVIPDTTNAK	y3	6
sll0224	800.951	298.213	AILDFQPGATIVEVK	b3	5
sll0224	800.951	413.239	AILDFQPGATIVEVK	b4	2
sll0224	800.951	913.535	AILDFQPGATIVEVK	y9	1
sll0224	800.951	474.292	AILDFQPGATIVEVK	y4	4
sll0224	800.951	375.224	AILDFQPGATIVEVK	y3	6
sll0224	552.259	304.114	TSDNPQQWK	b3	5
sll0224	552.259	800.405	TSDNPQQWK	y6	6
sll0224	552.259	686.362	TSDNPQQWK	y5	1
sll0224	552.259	461.251	TSDNPQQWK	y3	3
sll0224	552.259	343.685	TSDNPQQWK	y5	4
sll0224	1037.49	1381.66	YMEGVISDQTAAVEIYER	y12	6
sll0224	1037.49	879.457	YMEGVISDQTAAVEIYER	y7	5
sll0224	1037.49	709.352	YMEGVISDQTAAVEIYER	y5	3
sll0224	1037.49	580.309	YMEGVISDQTAAVEIYER	y4	4
sll0224	1037.49	467.225	YMEGVISDQTAAVEIYER	y3	2
sll0224	783.865	1233.57	WFDEETGVAPYPR	y11	6
sll0224	783.865	860.462	WFDEETGVAPYPR	y8	4
sll0224	783.865	759.415	WFDEETGVAPYPR	y7	3
sll0224	783.865	603.325	WFDEETGVAPYPR	y5	1
sll0224	783.865	532.288	WFDEETGVAPYPR	y4	2
sll0290	527.27	350.219	VLHEGLDDR	b3	5
sll0290	527.27	841.38	VLHEGLDDR	y7	6
sll0290	527.27	704.321	VLHEGLDDR	y6	4
sll0290	527.27	575.278	VLHEGLDDR	y5	3
sll0290	527.27	421.194	VLHEGLDDR	y7	2
sll0290	1113.53	300.155	LADEGIFLNDYVDLSQEER	b3	1
sll0290	1113.53	486.219	LADEGIFLNDYVDLSQEER	b5	6
sll0290	1113.53	876.406	LADEGIFLNDYVDLSQEER	y7	4
sll0290	1113.53	761.379	LADEGIFLNDYVDLSQEER	y6	2
sll0290	1113.53	648.295	LADEGIFLNDYVDLSQEER	y5	3
sll0290	633.827	739.446	DEPWASVIPPR	y7	2
sll0290	633.827	668.409	DEPWASVIPPR	y6	3
sll0290	633.827	482.309	DEPWASVIPPR	y4	4
sll0290	633.827	369.224	DEPWASVIPPR	y3	1
sll0290	769.331	265.124	HVYEFVDGDEDGR	b4	4
sll0290	769.331	1301.53	HVYEFVDGDEDGR	y11	5
sll0290	769.331	648.258	HVYEFVDGDEDGR	y6	3
sll0290	769.331	476.21	HVYEFVDGDEDGR	y4	6
sll0290	914.476	660.331	TSGDSPIVNALIAAAENGK	y7	1
sll0290	914.476	589.294	TSGDSPIVNALIAAAENGK	y6	4
sll0290	914.476	518.257	TSGDSPIVNALIAAAENGK	y5	3
sll0290	914.476	318.177	TSGDSPIVNALIAAAENGK	y3	2
sll0290	704.318	261.098	FDEENNINWAR	b4	1
sll0290	704.318	659.362	FDEENNINWAR	y5	5
sll0290	704.318	546.278	FDEENNINWAR	y4	2
sll0290	704.318	432.235	FDEENNINWAR	y3	6
sll0290	681.844	400.198	YVHIGTGNYNPK	b3	1
sll0290	681.844	513.282	YVHIGTGNYNPK	b4	6
sll0290	681.844	963.489	YVHIGTGNYNPK	y9	4
sll0290	681.844	850.405	YVHIGTGNYNPK	y8	3
sll0290	681.844	358.208	YVHIGTGNYNPK	y3	5
sll0290	506.802	326.244	LLVAPVNMR	b3	5
sll0290	506.802	786.429	LLVAPVNMR	y7	3
sll0290	506.802	687.361	LLVAPVNMR	y6	4
sll0290	506.802	616.324	LLVAPVNMR	y5	2
sll0290	506.802	308.665	LLVAPVNMR	y5	6
sll0290	425.22	302.153	MVAMIER	b3	5
sll0290	425.22	718.392	MVAMIER	y6	6
sll0290	425.22	619.323	MVAMIER	y5	1
sll0290	425.22	548.286	MVAMIER	y4	3
sll0290	425.22	417.246	MVAMIER	y3	4
sll0290	845.913	386.182	QAWELQPDGTYVQR	b3	3
sll0290	845.913	258.116	QAWELQPDGTYVQR	b4	5
sll0290	845.913	935.458	QAWELQPDGTYVQR	y8	1
sll0290	845.913	723.378	QAWELQPDGTYVQR	y6	2
sll0533	709.375	244.129	ATAIEELIDDSIK	b3	1
sll0533	709.375	803.451	ATAIEELIDDSIK	y7	6
sll0533	709.375	690.367	ATAIEELIDDSIK	y6	5
sll0533	709.375	577.283	ATAIEELIDDSIK	y5	4
sll0533	709.375	462.256	ATAIEELIDDSIK	y4	3
sll0533	709.375	347.229	ATAIEELIDDSIK	y3	2
sll0533	972.449	242.15	VAADVFPEAEYEPESYK	b3	3
sll0533	972.449	357.177	VAADVFPEAEYEPESYK	b4	1
sll0533	972.449	1341.58	VAADVFPEAEYEPESYK	y11	6
sll0533	972.449	623.304	VAADVFPEAEYEPESYK	y5	2
sll0533	972.449	397.208	VAADVFPEAEYEPESYK	y3	4
sll0533	972.449	312.155	VAADVFPEAEYEPESYK	y5	5
sll0533	662.804	260.088	GSDFEVTLEDGR	b3	4
sll0533	662.804	789.41	GSDFEVTLEDGR	y7	3
sll0533	662.804	690.342	GSDFEVTLEDGR	y6	2
sll0533	662.804	589.294	GSDFEVTLEDGR	y5	5
sll0533	662.804	347.167	GSDFEVTLEDGR	y3	6
sll0533	832.434	300.155	LGELFTGDLPETMIK	b3	1
sll0533	832.434	718.377	LGELFTGDLPETMIK	b7	2
sll0533	832.434	1104.56	LGELFTGDLPETMIK	y10	3
sll0533	832.434	1003.51	LGELFTGDLPETMIK	y9	6
sll0533	832.434	831.464	LGELFTGDLPETMIK	y7	4
sll0533	832.434	492.285	LGELFTGDLPETMIK	y4	5
sll0533	630.834	1048.51	LVAQTAMELER	y9	3
sll0533	630.834	849.413	LVAQTAMELER	y7	2
sll0533	630.834	748.366	LVAQTAMELER	y6	4
sll0533	630.834	677.329	LVAQTAMELER	y5	5
sll0533	630.834	417.246	LVAQTAMELER	y3	6
sll0533	583.305	302.153	MGLDVSQLFR	b3	4
sll0533	583.305	417.18	MGLDVSQLFR	b4	5
sll0533	583.305	864.457	MGLDVSQLFR	y7	3
sll0533	583.305	749.43	MGLDVSQLFR	y6	2
sll0533	583.305	650.362	MGLDVSQLFR	y5	1
sll0533	574.784	733.428	QGDDMLQTLK	y6	5
sll0533	574.784	602.387	QGDDMLQTLK	y5	2
sll0533	574.784	489.303	QGDDMLQTLK	y4	4
sll0533	574.784	361.245	QGDDMLQTLK	y3	1
sll0533	516.792	330.166	TDLMIGAIAK	b3	3
sll0533	516.792	703.417	TDLMIGAIAK	y7	6
sll0533	516.792	572.377	TDLMIGAIAK	y6	2
sll0533	516.792	459.293	TDLMIGAIAK	y5	4
sll0533	726.883	327.203	LVNFVESSLTESK	b3	2
sll0533	726.883	979.494	LVNFVESSLTESK	y9	6
sll0533	726.883	880.426	LVNFVESSLTESK	y8	3
sll0533	726.883	464.235	LVNFVESSLTESK	y4	5
sll0680	956.928	316.15	TVDFGASDVAMDDEEIAK	b3	1
sll0680	956.928	1021.45	TVDFGASDVAMDDEEIAK	y9	3
sll0680	956.928	950.414	TVDFGASDVAMDDEEIAK	y8	5
sll0680	956.928	331.234	TVDFGASDVAMDDEEIAK	y3	6
sll0680	1131.52	880.423	SDGSGTTAVFTMNLAAMSPEFK	y8	5
sll0680	1131.52	809.386	SDGSGTTAVFTMNLAAMSPEFK	y7	4
sll0680	1131.52	738.349	SDGSGTTAVFTMNLAAMSPEFK	y6	6
sll0680	1131.52	607.309	SDGSGTTAVFTMNLAAMSPEFK	y5	3
sll0680	1131.52	520.277	SDGSGTTAVFTMNLAAMSPEFK	y4	1
sll0680	474.245	747.367	TVEWPTSK	y6	5
sll0680	474.245	618.325	TVEWPTSK	y5	4
sll0680	474.245	432.245	TVEWPTSK	y4	1
sll0680	474.245	335.193	TVEWPTSK	y3	6
sll0681	599.327	316.15	DSLASLPPELR	b3	4
sll0681	599.327	882.504	DSLASLPPELR	y8	6
sll0681	599.327	811.467	DSLASLPPELR	y7	3
sll0681	599.327	611.351	DSLASLPPELR	y5	1
sll0683	627.827	1040.52	TIFDNVVYGAR	y9	3
sll0683	627.827	778.421	TIFDNVVYGAR	y7	5
sll0683	627.827	565.309	TIFDNVVYGAR	y5	2
sll0683	627.827	466.241	TIFDNVVYGAR	y4	4
sll0683	627.827	303.178	TIFDNVVYGAR	y3	6
sll0683	673.333	285.156	GNLEELAEDSLR	b3	4
sll0683	673.333	932.468	GNLEELAEDSLR	y8	6
sll0683	673.333	803.426	GNLEELAEDSLR	y7	3
sll0683	673.333	690.342	GNLEELAEDSLR	y6	1
sll0683	673.333	490.262	GNLEELAEDSLR	y4	5
sll0683	673.333	375.235	GNLEELAEDSLR	y3	2
sll0683	1371.69	256.166	AIAMQPEVLLMDEPC[+57.021464]SALDPISTLK	b3	1
sll0683	1371.69	387.206	AIAMQPEVLLMDEPC[+57.021464]SALDPISTLK	b4	3
sll0683	1371.69	515.265	AIAMQPEVLLMDEPC[+57.021464]SALDPISTLK	b5	6
sll0683	1371.69	658.413	AIAMQPEVLLMDEPC[+57.021464]SALDPISTLK	y6	2
sll0683	1371.69	448.277	AIAMQPEVLLMDEPC[+57.021464]SALDPISTLK	y4	4
sll0683	1371.69	361.245	AIAMQPEVLLMDEPC[+57.021464]SALDPISTLK	y3	5
sll0683	549.285	320.16	VGYLVEFDR	b3	2
sll0683	549.285	998.494	VGYLVEFDR	y8	6
sll0683	549.285	778.409	VGYLVEFDR	y6	5
sll0683	549.285	665.325	VGYLVEFDR	y5	1
sll0683	549.285	566.257	VGYLVEFDR	y4	3
sll0683	549.285	437.214	VGYLVEFDR	y3	4
sll0683	639.304	304.166	VFGDPQEQETK	b3	6
sll0683	639.304	1031.46	VFGDPQEQETK	y9	4
sll0683	639.304	859.416	VFGDPQEQETK	y7	1
sll0683	639.304	430.211	VFGDPQEQETK	y7	3
sll0684	509.771	361.118	MNDLVSIAR	b3	3
sll0684	509.771	773.452	MNDLVSIAR	y7	5
sll0684	509.771	658.425	MNDLVSIAR	y6	6
sll0684	509.771	545.341	MNDLVSIAR	y5	2
sll0684	509.771	446.272	MNDLVSIAR	y4	1
sll0684	626.322	1051.52	SIYENIAWGAK	y9	6
sll0684	626.322	759.415	SIYENIAWGAK	y7	5
sll0684	626.322	532.288	SIYENIAWGAK	y5	4
sll0684	626.322	461.251	SIYENIAWGAK	y4	3
sll0684	626.322	275.171	SIYENIAWGAK	y3	2
sll0684	990.97	342.177	LNNFQGDMDELVETSLR	b3	4
sll0684	990.97	704.394	LNNFQGDMDELVETSLR	y6	5
sll0684	990.97	605.325	LNNFQGDMDELVETSLR	y5	2
sll0684	990.97	476.283	LNNFQGDMDELVETSLR	y4	3
sll0684	990.97	375.235	LNNFQGDMDELVETSLR	y3	6
sll0684	357.195	657.339	IEGLMHELK	y5	3
sll0684	357.195	526.298	IEGLMHELK	y4	2
sll0684	357.195	389.239	IEGLMHELK	y3	4
sll0684	874.91	302.135	VSDYTAFFNVESVDR	b3	1
sll0684	874.91	1112.54	VSDYTAFFNVESVDR	y9	4
sll0684	874.91	965.469	VSDYTAFFNVESVDR	y8	2
sll0684	874.91	818.4	VSDYTAFFNVESVDR	y7	6
sll0684	874.91	605.289	VSDYTAFFNVESVDR	y5	5
sll0684	874.91	476.246	VSDYTAFFNVESVDR	y4	3
sll0684	1060.55	244.129	VGSLVEYGPTEEIFQNPLK	b3	2
sll0684	1060.55	357.213	VGSLVEYGPTEEIFQNPLK	b4	1
sll0684	1060.55	1372.71	VGSLVEYGPTEEIFQNPLK	y12	6
sll0684	1060.55	746.42	VGSLVEYGPTEEIFQNPLK	y6	5
sll0684	1060.55	471.293	VGSLVEYGPTEEIFQNPLK	y4	4
sll0684	1060.55	357.25	VGSLVEYGPTEEIFQNPLK	y3	3
sll0745	597.324	363.166	YQAEDLLLTK	b3	5
sll0745	597.324	902.519	YQAEDLLLTK	y8	4
sll0745	597.324	702.44	YQAEDLLLTK	y6	6
sll0745	597.324	361.245	YQAEDLLLTK	y3	3
sll1802	574.291	242.15	VAAIEYDPNR	b3	2
sll1802	574.291	977.469	VAAIEYDPNR	y8	5
sll1802	574.291	793.348	VAAIEYDPNR	y6	3
sll1802	574.291	664.305	VAAIEYDPNR	y5	4
sll1802	574.291	501.242	VAAIEYDPNR	y4	6
sll1802	574.291	386.215	VAAIEYDPNR	y3	1
sll1802	635.34	298.213	IALLFYTDGEK	b3	1
sll1802	635.34	972.467	IALLFYTDGEK	y8	6
sll1802	635.34	859.383	IALLFYTDGEK	y7	3
sll1802	635.34	712.315	IALLFYTDGEK	y6	4
sll1802	635.34	549.251	IALLFYTDGEK	y5	5
sll1802	635.34	333.177	IALLFYTDGEK	y3	2
sll1802	852.476	994.543	IPLGSEIHNVELVAGR	y9	1
sll1802	852.476	857.484	IPLGSEIHNVELVAGR	y8	5
sll1802	852.476	303.178	IPLGSEIHNVELVAGR	y3	4
sll1802	852.476	795.934	IPLGSEIHNVELVAGR	y15	6
sll1802	462.737	233.084	EGDYVTIK	b4	5
sll1802	462.737	738.403	EGDYVTIK	y6	6
sll1802	462.737	623.376	EGDYVTIK	y5	4
sll1802	462.737	460.313	EGDYVTIK	y4	2
sll1802	462.737	361.245	EGDYVTIK	y3	1
sll1802	453.229	616.378	EC[+57.021464]VATLGR	y6	3
sll1802	453.229	517.309	EC[+57.021464]VATLGR	y5	1
sll1802	453.229	446.272	EC[+57.021464]VATLGR	y4	2
sll1802	453.229	345.224	EC[+57.021464]VATLGR	y3	5
sll1802	411.709	723.342	VSNAEFR	y6	2
sll1802	411.709	636.31	VSNAEFR	y5	3
sll1802	411.709	522.267	VSNAEFR	y4	4
sll1802	411.709	451.23	VSNAEFR	y3	5
sll1802	882.37	244.129	GSVMNPC[+57.021464]DHPHGGGEGR	b3	5
sll1802	882.37	1275.53	GSVMNPC[+57.021464]DHPHGGGEGR	y12	6
sll1802	882.37	903.418	GSVMNPC[+57.021464]DHPHGGGEGR	y9	3
sll1802	882.37	766.359	GSVMNPC[+57.021464]DHPHGGGEGR	y8	1
sll1802	882.37	532.247	GSVMNPC[+57.021464]DHPHGGGEGR	y6	4
sll1807	398.9	312.192	TIPSHSQVVVK	b3	1
sll1807	398.9	200.116	TIPSHSQVVVK	b4	2
sll1807	398.9	376.19	TIPSHSQVVVK	b7	5
sll1807	398.9	659.409	TIPSHSQVVVK	y6	6
sll1807	678.652	1205.58	QEGESGQISSYEAPIHSSK	y11	6
sll1807	678.652	868.452	QEGESGQISSYEAPIHSSK	y8	5
sll1807	678.652	739.41	QEGESGQISSYEAPIHSSK	y7	3
sll1807	678.652	668.373	QEGESGQISSYEAPIHSSK	y6	1
sll1807	678.652	458.236	QEGESGQISSYEAPIHSSK	y4	2
sll1807	678.652	321.177	QEGESGQISSYEAPIHSSK	y3	4
sll1807	421.228	742.38	VMLYSTK	y6	6
sll1807	421.228	611.34	VMLYSTK	y5	2
sll1807	421.228	498.256	VMLYSTK	y4	5
sll1807	421.228	335.193	VMLYSTK	y3	1
sll1807	600.272	926.421	IC[+57.021464]YTVTDDGR	y8	4
sll1807	600.272	763.358	IC[+57.021464]YTVTDDGR	y7	5
sll1807	600.272	563.242	IC[+57.021464]YTVTDDGR	y5	6
sll1807	600.272	347.167	IC[+57.021464]YTVTDDGR	y3	3
sll1817	734.857	272.124	GDVISWASAGSSGFK	b3	1
sll1817	734.857	1084.51	GDVISWASAGSSGFK	y11	6
sll1817	734.857	811.394	GDVISWASAGSSGFK	y9	3
sll1817	734.857	740.357	GDVISWASAGSSGFK	y8	2
sll1817	734.857	653.325	GDVISWASAGSSGFK	y7	5
sll1817	734.857	582.288	GDVISWASAGSSGFK	y6	4
sll1817	725.85	1032.51	GTPYAAQTAADSAAR	y11	4
sll1817	725.85	961.47	GTPYAAQTAADSAAR	y10	2
sll1817	725.85	890.433	GTPYAAQTAADSAAR	y9	6
sll1817	725.85	762.374	GTPYAAQTAADSAAR	y8	3
sll1817	725.85	661.326	GTPYAAQTAADSAAR	y7	5
sll1817	725.85	404.225	GTPYAAQTAADSAAR	y4	1
sll1817	650.838	371.193	QLEVMVSGPGAGR	b3	6
sll1817	650.838	601.301	QLEVMVSGPGAGR	b5	1
sll1817	650.838	700.37	QLEVMVSGPGAGR	b6	2
sll1817	650.838	831.414	QLEVMVSGPGAGR	y9	3
sll1817	650.838	514.273	QLEVMVSGPGAGR	y6	4
sll1817	677.906	1042.63	ALQGAGLEITLIR	y10	3
sll1817	677.906	914.567	ALQGAGLEITLIR	y8	2
sll1817	677.906	744.461	ALQGAGLEITLIR	y6	1
sll1817	677.906	615.419	ALQGAGLEITLIR	y5	4
sll1817	677.906	502.335	ALQGAGLEITLIR	y4	5
slr0319	590.311	903.468	LYQNELPFR	y7	4
slr0319	590.311	775.41	LYQNELPFR	y6	3
slr0319	590.311	661.367	LYQNELPFR	y5	6
slr0319	590.311	532.324	LYQNELPFR	y4	2
slr0319	590.311	419.24	LYQNELPFR	y3	1
slr0319	493.287	342.202	DIIIVEAGR	b3	4
slr0319	493.287	757.457	DIIIVEAGR	y7	6
slr0319	493.287	644.373	DIIIVEAGR	y6	3
slr0319	493.287	531.289	DIIIVEAGR	y5	2
slr0319	493.287	303.178	DIIIVEAGR	y3	5
slr0550	581.792	702.414	EAMEATQIAAK	y7	3
slr0550	581.792	631.377	EAMEATQIAAK	y6	5
slr0550	581.792	402.271	EAMEATQIAAK	y4	6
slr0550	581.792	289.187	EAMEATQIAAK	y3	2
slr0550	661.341	287.135	TGQSLAPETVYR	b3	3
slr0550	661.341	1035.55	TGQSLAPETVYR	y9	5
slr0550	661.341	948.515	TGQSLAPETVYR	y8	6
slr0550	661.341	835.431	TGQSLAPETVYR	y7	2
slr0550	661.341	764.394	TGQSLAPETVYR	y6	1
slr0550	661.341	538.298	TGQSLAPETVYR	y4	4
slr0550	599.856	314.171	LAEVENIVAIK	b3	2
slr0550	599.856	470.261	LAEVENIVAIK	b9	1
slr0550	599.856	786.472	LAEVENIVAIK	y7	5
slr0550	599.856	430.302	LAEVENIVAIK	y4	4
slr0550	599.856	331.234	LAEVENIVAIK	y3	3
slr0550	687.865	929.541	EATGSLEQASLIR	y8	6
slr0550	687.865	816.457	EATGSLEQASLIR	y7	1
slr0550	687.865	559.356	EATGSLEQASLIR	y5	2
slr0550	687.865	488.319	EATGSLEQASLIR	y4	3
slr0793	1021.54	341.218	QLVFVQYGEFYEPVPVK	b3	2
slr0793	1021.54	488.287	QLVFVQYGEFYEPVPVK	b4	5
slr0793	1021.54	1164.59	QLVFVQYGEFYEPVPVK	y10	6
slr0793	1021.54	539.355	QLVFVQYGEFYEPVPVK	y5	4
slr0793	1021.54	343.234	QLVFVQYGEFYEPVPVK	y3	1
slr0793	1016.53	230.114	TGATQGELIEITEGLSVGEK	b3	1
slr0793	1016.53	689.383	TGATQGELIEITEGLSVGEK	y7	4
slr0793	1016.53	519.277	TGATQGELIEITEGLSVGEK	y5	3
slr0793	1016.53	432.245	TGATQGELIEITEGLSVGEK	y4	6
slr0793	1016.53	333.177	TGATQGELIEITEGLSVGEK	y3	2
slr0955	788.401	302.135	TAEAFGAQGMVLPQR	b3	3
slr0955	788.401	373.172	TAEAFGAQGMVLPQR	b4	6
slr0955	788.401	1056.56	TAEAFGAQGMVLPQR	y10	4
slr0955	788.401	800.445	TAEAFGAQGMVLPQR	y7	5
slr0955	788.401	513.314	TAEAFGAQGMVLPQR	y4	2
slr0955	788.401	400.23	TAEAFGAQGMVLPQR	y3	1
slr0955	503.784	228.134	VAGITSTVMK	b3	1
slr0955	503.784	836.455	VAGITSTVMK	y8	3
slr0955	503.784	666.349	VAGITSTVMK	y6	2
slr0955	503.784	478.269	VAGITSTVMK	y4	6
slr0955	503.784	377.222	VAGITSTVMK	y3	5
slr0955	446.582	242.15	VAAGALEHFPVAR	b3	5
slr0955	446.582	855.447	VAAGALEHFPVAR	y7	4
slr0955	446.582	726.405	VAAGALEHFPVAR	y6	3
slr0955	446.582	589.346	VAAGALEHFPVAR	y5	2
slr0955	446.582	442.277	VAAGALEHFPVAR	y4	1
slr0955	384.876	375.698	QTALHQADLR	b7	3
slr0955	384.876	602.326	QTALHQADLR	y5	2
slr0955	384.876	474.267	QTALHQADLR	y4	5
slr0955	384.876	403.23	QTALHQADLR	y3	6
slr0955	492.266	550.183	HC[+57.021464]DHLITIPLAGK	b4	2
slr0955	492.266	275.595	HC[+57.021464]DHLITIPLAGK	b4	6
slr0955	492.266	332.137	HC[+57.021464]DHLITIPLAGK	b5	5
slr0955	492.266	485.308	HC[+57.021464]DHLITIPLAGK	y5	1
slr0955	492.266	275.171	HC[+57.021464]DHLITIPLAGK	y3	3
slr1247	830.428	242.15	IGASQDPNWGFQVLK	b3	5
slr1247	830.428	587.27	IGASQDPNWGFQVLK	b11	4
slr1247	830.428	1088.59	IGASQDPNWGFQVLK	y9	1
slr1247	830.428	691.414	IGASQDPNWGFQVLK	y6	2
slr1247	830.428	359.265	IGASQDPNWGFQVLK	y3	6
slr1247	738.87	257.124	AGQYVEPSLAEANK	b3	1
slr1247	738.87	420.188	AGQYVEPSLAEANK	b4	3
slr1247	738.87	829.441	AGQYVEPSLAEANK	y8	2
slr1247	738.87	532.273	AGQYVEPSLAEANK	y5	6
slr1247	738.87	332.193	AGQYVEPSLAEANK	y3	4
slr1672	513.269	782.372	ELTQFYPK	b6	3
slr1672	513.269	783.404	ELTQFYPK	y6	5
slr1672	513.269	554.297	ELTQFYPK	y4	4
slr1672	513.269	407.229	ELTQFYPK	y3	2
slr1672	527.932	902.473	AGWVEHDALEIWR	y7	4
slr1672	527.932	787.446	AGWVEHDALEIWR	y6	5
slr1672	527.932	603.325	AGWVEHDALEIWR	y4	1
slr1672	527.932	474.282	AGWVEHDALEIWR	y3	2
slr1672	527.932	520.27	AGWVEHDALEIWR	y8	6
slr1672	531.287	861.45	TVMQEVVQK	y7	4
slr1672	531.287	730.409	TVMQEVVQK	y6	6
slr1672	531.287	602.351	TVMQEVVQK	y5	5
slr1672	531.287	374.24	TVMQEVVQK	y3	3
slr1672	532.758	674.387	ETC[+57.021464]LLWDK	y5	4
slr1672	532.758	561.303	ETC[+57.021464]LLWDK	y4	3
slr1672	532.758	448.219	ETC[+57.021464]LLWDK	y3	2
slr1672	573.637	984.526	TTGQPLHPAIVWQDR	y8	2
slr1672	573.637	604.284	TTGQPLHPAIVWQDR	y4	4
slr1672	573.637	666.365	TTGQPLHPAIVWQDR	y11	3
slr1672	990.026	528.266	EVVEAINQDSPAPIQQLK	b5	4
slr1672	990.026	981.573	EVVEAINQDSPAPIQQLK	y9	5
slr1672	990.026	894.541	EVVEAINQDSPAPIQQLK	y8	3
slr1672	990.026	726.451	EVVEAINQDSPAPIQQLK	y6	2
slr1853	748.909	228.134	VAGEAWGLPLIDQK	b3	2
slr1853	748.909	883.525	VAGEAWGLPLIDQK	y8	5
slr1853	748.909	713.419	VAGEAWGLPLIDQK	y6	1
slr1853	748.909	503.282	VAGEAWGLPLIDQK	y4	6
slr1853	748.909	390.198	VAGEAWGLPLIDQK	y3	4
slr1857	880.954	297.156	APQPFVEIPFPESFR	b3	4
slr1857	880.954	1121.56	APQPFVEIPFPESFR	y9	3
slr1857	880.954	992.52	APQPFVEIPFPESFR	y8	2
slr1857	880.954	879.436	APQPFVEIPFPESFR	y7	1
slr1857	880.954	635.315	APQPFVEIPFPESFR	y5	5
slr1857	880.954	409.219	APQPFVEIPFPESFR	y3	6
slr1857	677.31	201.095	DVWGTQPNWDDIYQHR	b3	2
slr1857	677.31	831.411	DVWGTQPNWDDIYQHR	y6	6
slr1857	677.31	603.3	DVWGTQPNWDDIYQHR	y4	1
slr1857	677.31	440.236	DVWGTQPNWDDIYQHR	y3	5
slr1857	540.773	933.471	FGMQIDELK	y8	5
slr1857	540.773	745.409	FGMQIDELK	y6	6
slr1857	540.773	617.35	FGMQIDELK	y5	3
slr1857	540.773	504.266	FGMQIDELK	y4	4
slr1857	482.241	288.138	GMVLDC[+57.021464]LR	b3	5
slr1857	482.241	775.413	GMVLDC[+57.021464]LR	y6	4
slr1857	482.241	676.345	GMVLDC[+57.021464]LR	y5	1
slr1857	482.241	563.261	GMVLDC[+57.021464]LR	y4	3
slr1857	482.241	448.234	GMVLDC[+57.021464]LR	y3	2
slr1857	445.711	704.336	WAEWNGK	y6	3
slr1857	445.711	504.257	WAEWNGK	y4	4
slr1857	445.711	318.177	WAEWNGK	y3	2
slr1857	602.293	244.093	GDAGVIGEMAQR	b3	6
slr1857	602.293	301.114	GDAGVIGEMAQR	b4	3
slr1857	602.293	400.183	GDAGVIGEMAQR	b5	5
slr1857	602.293	804.403	GDAGVIGEMAQR	y7	2
slr1857	602.293	691.319	GDAGVIGEMAQR	y6	1
slr1857	602.293	505.255	GDAGVIGEMAQR	y4	4
ssl1426	480.256	315.166	LSNLALVHEADEK	b3	3
ssl1426	480.256	827.389	LSNLALVHEADEK	y7	5
ssl1426	480.256	728.321	LSNLALVHEADEK	y6	4
ssl1426	480.256	591.262	LSNLALVHEADEK	y5	6
sll1679	517.28	805.441	IDTETVVTR	y7	3
sll1679	517.28	575.351	IDTETVVTR	y5	2
sll1679	517.28	474.303	IDTETVVTR	y4	5
sll1679	517.28	375.235	IDTETVVTR	y3	4
sll1679	623.83	274.103	GTDEVTDLAVVK	b3	5
sll1679	623.83	745.445	GTDEVTDLAVVK	y7	1
sll1679	623.83	529.371	GTDEVTDLAVVK	y5	3
sll1679	623.83	416.287	GTDEVTDLAVVK	y4	6
sll1679	623.83	345.25	GTDEVTDLAVVK	y3	4
sll1679	479.254	230.114	SAAQAGIPDK	b3	3
sll1679	479.254	799.431	SAAQAGIPDK	y8	6
sll1679	479.254	600.335	SAAQAGIPDK	y6	2
sll1679	479.254	529.298	SAAQAGIPDK	y5	4
sll1679	479.254	359.193	SAAQAGIPDK	y3	1
sll1679	571.83	286.14	GEVIGINTAIR	b3	2
sll1679	571.83	342.19	GEVIGINTAIR	b7	5
sll1679	571.83	857.52	GEVIGINTAIR	y8	4
sll1679	571.83	744.436	GEVIGINTAIR	y7	1
sll1679	571.83	687.415	GEVIGINTAIR	y6	6
sll1679	571.83	574.331	GEVIGINTAIR	y5	3
sll1679	794.422	258.108	ADATGIGFAIPIDQAK	b3	6
sll1679	794.422	416.178	ADATGIGFAIPIDQAK	b5	4
sll1679	794.422	1059.58	ADATGIGFAIPIDQAK	y10	3
sll1679	794.422	671.372	ADATGIGFAIPIDQAK	y6	1
sll1679	794.422	461.235	ADATGIGFAIPIDQAK	y4	2
sll1679	794.422	346.208	ADATGIGFAIPIDQAK	y3	5
sll1679	486.28	759.4	IVEQAGLNK	y7	3
sll1679	486.28	502.298	IVEQAGLNK	y5	4
sll1679	486.28	431.261	IVEQAGLNK	y4	5
sll1679	486.28	374.24	IVEQAGLNK	y3	6
sll0247	458.261	747.425	APADLSTLK	y7	1
sll0247	458.261	676.388	APADLSTLK	y6	2
sll0247	458.261	561.361	APADLSTLK	y5	3
sll0247	458.261	448.277	APADLSTLK	y4	6
sll0247	458.261	422.742	APADLSTLK	y8	5
sll0247	399.213	726.382	ALGFDFK	y6	5
sll0247	399.213	613.298	ALGFDFK	y5	2
sll0247	399.213	556.277	ALGFDFK	y4	6
sll0247	399.213	409.208	ALGFDFK	y3	4
sll0247	399.213	205.108	ALGFDFK	y3	3
slr1331	987.491	1148.61	WEPADQVGLAQLTGTTMR	y11	1
slr1331	987.491	978.504	WEPADQVGLAQLTGTTMR	y9	2
slr1331	987.491	907.467	WEPADQVGLAQLTGTTMR	y8	4
slr1331	987.491	666.324	WEPADQVGLAQLTGTTMR	y6	3
slr1331	987.491	565.276	WEPADQVGLAQLTGTTMR	y5	5
slr1331	711.865	330.166	TVEYQTLANIDR	b3	4
slr1331	711.865	247.118	TVEYQTLANIDR	b4	5
slr1331	711.865	802.442	TVEYQTLANIDR	y7	3
slr1331	711.865	701.394	TVEYQTLANIDR	y6	6
slr1331	711.865	588.31	TVEYQTLANIDR	y5	2
slr1331	719.377	344.182	ITEVTAEELAYAK	b3	3
slr1331	719.377	995.504	ITEVTAEELAYAK	y9	6
slr1331	719.377	452.25	ITEVTAEELAYAK	y4	5
slr1331	719.377	381.213	ITEVTAEELAYAK	y3	2
slr1331	958.999	631.309	YLQPEQMIAVIVGQGDR	b5	5
slr1331	958.999	1027.59	YLQPEQMIAVIVGQGDR	y10	6
slr1331	958.999	914.505	YLQPEQMIAVIVGQGDR	y9	1
slr1331	958.999	744.4	YLQPEQMIAVIVGQGDR	y7	4
slr1331	958.999	532.247	YLQPEQMIAVIVGQGDR	y5	3
