# Supplementary material for: Proteomic analysis of the regulatory networks of ClpX in a model cyanobacterium Synechocystis sp. PCC 6803
Source: Front Plant Sci. 2022 Sep 29;13:994056. doi: 10.3389/fpls.2022.994056 (PMC9560874; doi:10.3389/fpls.2022.994056)
Supplement: Supplementary file 4 [file Table_3.xlsx]

## Sheet: Table S3
Table S3. Comparison of 8 Clp protease family members in Synechocystis sp. PCC 6803 with other species.
Clp type		Clp protease core				Clp molecular chaperon
Synechocystis sp.PCC 6803	Protein name	slr0542	sll0534	slr0165	slr0164	sll0535	sll0020		slr0156	slr1641
	Gene ID	ClpP1	ClpP2	ClpP3	ClpP4(ClpR)	ClpX	ClpC		ClpB1	ClpB2
	Length	198	226	202	225	445	821		898	872
Synechococcus sp. PCC 7002	Gene ID	A1847	A1535	A1194	A1193	A1534	A0141		A0431	A2353
	Identity(%)	86.8	84.97	76.02	72.77	78.92	90.95		78.62	81.55
Nostoc sp. PCC 7120	Gene ID	alr1238	alr3683	all4357		alr3684			alr2322	alr5084
	Identity(%)	79.7	82.04	71.79		81.61			72.68	78.38
Synechococcus elongatus PCC 7942	Gene ID	1554	2525	2537	2538	2526			0637	1089
	Identity(%)	76.96	82.05	80.93	78.64	75.17			65.37	74.91
Synechococcus sp. PCC9311	Gene ID	sync_0065	sync_0727	sync_1418	sync_0726	sync_0064	sync_1027			sync_1897
	Identity(%)	71.28	41.92	61.67	42.64	68.79	81.59			69.84
Nostoc punctiforme PCC 73102	Gene ID	F6219	F0850	R0987	R0988	F0851
	Identity(%)	79.19	79.33	73.74	62.67	79.19
Synechococcus elongatus PCC 6301	Gene ID	syc0012_c	syc1584_c	syc1573_d	syc1572_d	syc1583_c	syc1253_d		syc0888_d	syc0460_c
	Identity(%)	76.96	82.05	80.93	78.64	75.17	88.36		65.37	74.8
Bacillus subtilis	Gene ID		BSU34540			BSU28220	BSU00860	BSU13700	BSU16160
	Identity(%)		67.37			62.53	61.71	53.27	37.36
Escherichia coli	Gene ID	JW0427				JW0428				JW0866	JW2573
	Identity(%)	67.02				60.66				40.35	55.54
