# Supplementary material for: Proteomic analysis of the regulatory networks of ClpX in a model cyanobacterium Synechocystis sp. PCC 6803
Source: Front Plant Sci. 2022 Sep 29;13:994056. doi: 10.3389/fpls.2022.994056 (PMC9560874; doi:10.3389/fpls.2022.994056)
Supplement: Supplementary file 5 [file Table_4.xlsx]

## Sheet: Table S4A
Summary of all identified proteins.					Table S4A. List of all identified proteins.
Protein IDs	Majority protein IDs	Peptide counts (all)	Peptide counts (razor+unique)	Peptide counts (unique)	Description of majority protein		Number of proteins	Peptides	Razor + unique peptides	Unique peptides	Sequence coverage [%]	Unique + razor sequence coverage [%]	Unique sequence coverage [%]	Mol. weight [kDa]	Sequence length	Log_WT-1	Log_WT-2	Log_WT-3	Average_WT	Log_ClpX-1	Log_ClpX-2	Log_ClpX-3	Average_ClpX	Ratio(ClpX/WT)	p value
sll0002	sll0002	15	15	15	sll0002 penicillin-binding protein		1	15	15	15	20.3	20.3	20.3	92.611	860	17.5872	17.5843	17.6285	17.6	17.9829	17.8019	17.9108	17.8985	1.22988	0.0233249
sll0005	sll0005	15	15	15	sll0005 hypothetical protein		1	15	15	15	23.3	23.3	23.3	77.347	681	16.7544	16.8472	16.901	16.8342	17.2524	17.2847	17.2942	17.2771	1.35933	0.00573425
sll0006	sll0006	14	14	14	sll0006 putative aminotransferase		1	14	14	14	39.8	39.8	39.8	43.979	394	17.6736	17.6473	17.5837	17.6349	17.6477	17.6514	17.6042	17.6344	0.999688	0.989183
sll0007	sll0007	3	3	3	sll0007 hypothetical protein		1	3	3	3	20.4	20.4	20.4	21.249	191	14.8218	14.8693	14.9492	14.8801	14.6252	14.7519	14.6631	14.6801	0.870539	0.019333
sll0008	sll0008	5	5	5	sll0008 unknown protein		1	5	5	5	36.1	36.1	36.1	19.022	169	16.133	16.1856	16.2752	16.1979	16.1909	16.2008	16.1408	16.1775	0.985938	0.686058
sll0016	sll0016	7	7	7	sll0016 probable membrane-bound lytic transglycosylase A		1	7	7	7	23.2	23.2	23.2	42.115	383	18.0082	17.9389	18.3675	18.1049	18.2054	18.185	18.2382	18.2095	1.07522	0.513994
sll0017	sll0017	14	14	14	sll0017 glutamate-1-semialdehyde aminomutase		1	14	14	14	47.6	47.6	47.6	45.891	433	18.8408	18.8111	18.7729	18.8083	18.8691	18.7864	18.8694	18.8417	1.02341	0.385985
sll0018	sll0018	14	14	14	sll0018 fructose-bisphosphate aldolase, class II		1	14	14	14	48.2	48.2	48.2	38.972	359	20.0876	20.0983	20.0445	20.0768	20.1627	20.1299	20.1414	20.1447	1.04816	0.0336182
sll0019	sll0019	9	9	9	sll0019 1-deoxy-d-xylulose 5-phosphate reductoisomerase		1	9	9	9	32	32	32	42.532	394	16.473	16.5048	16.5559	16.5112	16.5603	16.5694	16.5889	16.5729	1.04367	0.112917
sll0020	sll0020	40	40	37	sll0020 ATP-dependent Clp protease ATPase subunit		1	40	40	37	53.6	53.6	49.8	91.173	821	19.9078	19.914	19.9339	19.9186	19.8724	19.8777	19.8623	19.8708	0.967455	0.0114989
sll0021	sll0021	6	6	6	sll0021 probable exonuclease		1	6	6	6	15.6	15.6	15.6	45.939	416	15.8645	15.8305	15.8599	15.8516	15.9315	15.9557	15.9746	15.9539	1.07347	0.00363505
sll0022	sll0022	7	7	7	sll0022 unknown protein		1	7	7	7	33.7	33.7	33.7	26.643	249	15.5307	15.5151	15.4119	15.4859	15.4139	15.5493	15.489	15.4841	0.998749	0.974964
sll0023	sll0023	7	7	7	sll0023 hypothetical protein		1	7	7	7	22.1	22.1	22.1	51.653	447	15.9651	15.9314	15.8725	15.923	15.8681	15.8588	15.7759	15.8343	0.940373	0.0906258
sll0024	sll0024	2	2	2	sll0024 unknown protein		1	2	2	2	7.7	7.7	7.7	32.318	273	13.7001	13.7118	13.8198	13.7439	13.8025	13.6796	13.6909	13.7243	0.986513	0.738308
sll0026	sll0026	1	1	1	sll0026 NADH dehydrogenase subunit 5 (involved in constitutive, low affinity CO2 uptake)		1	1	1	1	1.1	1.1	1.1	69.363	634	11.9526	11.9377	11.795	11.8951	11.8942	11.9219	12.0052	11.9405	1.03195	0.499507
sll0027	sll0027	4	4	4	sll0027 NADH dehydrogenase subunit 4 (involved in constitutive, low affinity CO2 uptake)		1	4	4	4	7.9	7.9	7.9	55.159	507	15.1104	15.0925	15.2235	15.1421	15.1084	14.9784	15.0107	15.0325	0.926812	0.125162
sll0030	sll0030	1	1	1	sll0030 cmp operon transcriptional regulator, LysR family protein		1	1	1	1	4.9	4.9	4.9	34.099	304	11.8892	12.0832	12.2568	12.0764	12.0296	12.0903	12.2239	12.1146	1.02687	0.771537
sll0031	sll0031	1	1	1	sll0031 hypothetical protein		1	1	1	1	1.8	1.8	1.8	43.41	395	14.8407	14.7987	14.8213	14.8202	15.1124	15.1657	15.1125	15.1302	1.23967	0.000288597
sll0033	sll0033	10	10	10	sll0033 carotene isomerase		1	10	10	10	24	24	24	55.771	501	17.0004	17.0709	16.8935	16.9883	16.9007	17.0192	16.983	16.9676	0.985768	0.758989
sll0034	sll0034	4	4	4	sll0034 putative carboxypeptidase		1	4	4	4	16.7	16.7	16.7	28.593	258	14.1318	14.2216	14.1271	14.1602	14.3262	14.2053	14.2754	14.269	1.07833	0.0810553
sll0036	sll0036	9	9	9	sll0036 hypothetical protein		1	9	9	9	24	24	24	45.909	433	15.9084	15.8989	16.0611	15.9561	15.9071	15.8448	15.8617	15.8712	0.94284	0.242714
sll0037	sll0037	6	6	6	sll0037 hypothetical protein		1	6	6	6	23.2	23.2	23.2	38.339	336	15.6348	15.6352	15.7224	15.6641	15.5371	15.5307	15.5998	15.5559	0.927684	0.0452443
sll0038	sll0038	16	16	16	sll0038 positive phototaxis protein, two-component response regulator PatA subfamily		1	16	16	16	40.5	40.5	40.5	44.815	402	17.8531	17.8719	17.8657	17.8636	17.8808	17.8963	17.9252	17.9008	1.02614	0.0872945
sll0039	sll0039	7	7	7	sll0039 positive phototaxis protein, two-component response regulator CheY subfamily		1	7	7	7	42.9	42.9	42.9	13.181	119	15.8674	15.9726	15.9003	15.9135	15.8886	15.8612	15.8784	15.876	0.974392	0.351583
sll0040	sll0040	2	2	2	sll0040 positive phototaxis protein, homologous to chemotaxis protein CheW		1	2	2	2	26.5	26.5	26.5	16.214	147	15.3044	15.34	15.3339	15.3261	15.237	15.1725	15.1388	15.1827	0.905423	0.0261786
sll0041	sll0041	33	33	33	sll0041 phytochrome-like photoreceptor protein for positive phototaxis; homologous to methyl-accepting chemotaxis protein		1	33	33	33	40	40	40	108.33	1000	18.5067	18.5734	18.6024	18.5609	18.5174	18.5561	18.5342	18.5359	0.982856	0.481046
sll0042	sll0042	8	8	8	sll0042 methyl-accepting chemotaxis protein for positive phototaxis		1	8	8	8	63.8	63.8	63.8	17.707	163	16.1405	16.1457	16.1493	16.1452	16.1358	16.0923	16.0829	16.1037	0.971628	0.122441
sll0043	sll0043	25	24	24	sll0043 positive phototaxis protein, homologous to chemotaxis protein CheA, two-component hybrid histidine kinase		1	25	24	24	19.3	18.7	18.7	153.1	1402	17.6864	17.7422	17.8031	17.7439	17.6781	17.7791	17.7751	17.7441	1.00013	0.996937
sll0044	sll0044	1	1	1	sll0044 unknown protein		1	1	1	1	5.6	5.6	5.6	17.733	161	13.7614	13.7069	13.5427	13.6704	13.6953	13.5985	13.4511	13.5816	0.940365	0.411386
sll0045	sll0045	4	4	4	sll0045 sucrose phosphate synthase		1	4	4	4	4.9	4.9	4.9	81.411	720	15.204	15.1285	15.0777	15.1367	15.0534	15.1307	15.1409	15.1083	0.980486	0.571839
sll0048	sll0048	13	13	13	sll0048 unknown protein		1	13	13	13	41.3	41.3	41.3	34.866	312	17.4671	17.56	17.6029	17.5433	17.5044	17.5317	17.5085	17.5149	0.980475	0.554288
sll0051	sll0051	7	7	7	sll0051 hypothetical protein		1	7	7	7	43.4	43.4	43.4	17.799	159	17.2456	17.2237	17.2306	17.2333	17.3816	17.3045	17.3364	17.3409	1.07742	0.032383
sll0053	sll0053	14	14	14	sll0053 biotin carboxylase		1	14	14	14	44.2	44.2	44.2	49.164	448	17.4094	17.3487	17.4337	17.3972	17.2869	17.314	17.2546	17.2851	0.925242	0.0267053
sll0055	sll0055	3	3	3	sll0055 processing protease		1	3	3	3	7	7	7	48.117	428	13.4016	13.5101	13.5671	13.4929	13.3931	13.3696	13.4841	13.4156	0.947815	0.272112
sll0057	sll0057	13	13	13	sll0057 heat shock protein GrpE		1	13	13	13	57.4	57.4	57.4	27.567	249	18.8097	18.8571	18.7373	18.8014	18.7786	18.9086	18.911	18.8661	1.04587	0.314565
sll0058	sll0058	21	21	21	sll0058 DnaK protein 1, heat shock protein 70, molecular chaperone		1	21	21	21	31.4	31.4	31.4	75.178	692	17.634	17.6518	17.6654	17.6504	17.7351	17.7102	17.7399	17.7284	1.05553	0.00381146
sll0063	sll0063	3	3	3	sll0063 hypothetical protein		1	3	3	3	7.3	7.3	7.3	43.113	395	14.2523	14.2254	14.2806	14.2528	14.1693	14.21	14.1957	14.1917	0.958538	0.0414314
sll0064	sll0064	3	3	3	sll0064 periplasmic protein, putative polar amino acid transport system substrate-binding protein		1	3	3	3	8	8	8	30.177	275	15.7459	15.696	15.8545	15.7654	16.0044	16.0148	16.0243	16.0145	1.18843	0.0319282
sll0065	sll0065	9	9	9	sll0065 acetolactate synthase small subunit		1	9	9	9	65.7	65.7	65.7	18.871	172	17.4152	17.3386	17.4688	17.4075	17.4234	17.4271	17.4295	17.4266	1.01333	0.663417
sll0066	sll0066	7	7	7	sll0066 unknown protein		1	7	7	7	27.6	27.6	27.6	34.168	315	15.7867	15.8099	15.7355	15.7774	15.6166	15.6922	15.6668	15.6585	0.920928	0.0190891
sll0067	sll0067	3	3	3	sll0067 glutathione S-transferase		1	3	3	3	14.1	14.1	14.1	20.377	184	16.3108	16.2905	16.3754	16.3256	16.1568	16.2296	16.203	16.1965	0.914392	0.0189624
sll0068	sll0068	18	18	18	sll0068 unknown protein		1	18	18	18	16	16	16	134.66	1209	17.837	17.7866	17.6193	17.7476	17.7362	17.7429	17.7294	17.7362	0.992095	0.877976
sll0069	sll0069	9	9	9	sll0069 hypothetical protein		1	9	9	9	41	41	41	28.901	256	16.959	16.9233	16.9511	16.9445	16.9684	16.9333	16.9979	16.9665	1.01541	0.377182
sll0070	sll0070	5	5	5	sll0070 phosphoribosylglycinamide formyltransferase		1	5	5	5	26.1	26.1	26.1	32.634	284	15.3217	15.3599	15.3409	15.3408	15.3493	15.2984	15.1094	15.2524	0.940523	0.348778
sll0071	sll0071	3	3	3	sll0071 hypothetical protein		1	3	3	3	9	9	9	38	333	13.2387	13.169	12.8423	13.0833	13.511	13.0512	13.386	13.3161	1.17505	0.274962
sll0072	sll0072	5	5	5	sll0072 hypothetical protein		1	5	5	5	30.4	30.4	30.4	25.799	227	14.6614	14.7904	14.6145	14.6888	14.5459	14.7301	14.6388	14.6383	0.965586	0.536473
sll0078	sll0078	19	19	19	sll0078 threonyl-tRNA synthetase		1	19	19	19	32.7	32.7	32.7	68.872	603	18.1122	18.0688	18.0685	18.0832	18.1388	18.1415	18.1569	18.1457	1.04432	0.0361191
sll0080	sll0080	7	7	7	sll0080 N-acetyl-gamma-glutamyl-phosphate reductase		1	7	7	7	24.8	24.8	24.8	38.209	351	16.359	16.3256	16.3291	16.3379	16.3529	16.3908	16.3429	16.3622	1.01695	0.256306
sll0082	sll0082	1	1	1	sll0082 hypothetical protein		1	1	1	1	11.9	11.9	11.9	13.848	118	11.6516	11.5724	11.7706	11.6649	11.3792	11.7183	11.7518	11.6165	0.966995	0.739394
sll0083	sll0083	3	3	3	sll0083 phosphoheptose isomerase		1	3	3	3	25.8	25.8	25.8	21.137	194	11.6915	11.6863	11.504	11.6273	11.4436	11.616	11.3747	11.4781	0.90176	0.19158
sll0085	sll0085	3	3	3	sll0085 unknown protein		1	3	3	3	9.9	9.9	9.9	46.427	403	12.9541	13.0132	12.6878	12.8851	12.6279	12.8688	12.8635	12.7867	0.934112	0.486541
sll0086	sll0086	12	12	12	sll0086 putative arsenical pump-driving ATPase		1	12	12	12	33.1	33.1	33.1	44.626	396	17.5409	17.5357	17.5671	17.5479	17.7749	17.6952	17.6884	17.7195	1.12632	0.0166364
sll0088	sll0088	2	2	2	sll0088 hypothetical protein		1	2	2	2	12.9	12.9	12.9	27.37	240	13.9388	13.9784	14.0231	13.9801	13.8651	13.8849	13.9257	13.8919	0.940712	0.0480984
sll0094	sll0094	8	8	8	sll0094 two-component sensor histidine kinase		1	8	8	8	17.3	17.3	17.3	51.781	457	17.0141	17.0735	17.084	17.0572	16.8443	16.9644	16.9384	16.9157	0.906573	0.0393851
sll0095	sll0095	2	2	2	sll0095 hypothetical protein		1	2	2	2	3.2	3.2	3.2	60.723	531	15.981	15.9757	15.9457	15.9675	15.8956	15.8838	15.849	15.8761	0.938643	0.00788514
sll0096	sll0096	10	10	10	sll0096 hypothetical protein		1	10	10	10	24.6	24.6	24.6	49.777	448	16.3213	16.3675	16.4402	16.3763	16.6204	16.6161	16.6116	16.616	1.18074	0.0197747
sll0098	sll0098	5	5	5	sll0098 hypothetical protein		1	5	5	5	16.9	16.9	16.9	38.856	350	15.1116	15.193	15.0849	15.1299	15.1651	15.1743	15.1025	15.1473	1.01216	0.68482
sll0099	sll0099	3	3	3	sll0099 precorrin-6y C5, 15-methyltransferase (decarboxylating)		1	3	3	3	5.9	5.9	5.9	46.276	425	12.7267	12.688	12.6143	12.6763	12.8446	12.7902	12.6806	12.7718	1.0684	0.186768
sll0100	sll0100	3	3	3	sll0100 N-acyl-L-amino acid amidohydrolase		1	3	3	3	8.4	8.4	8.4	42.656	393	13.6439	13.7941	13.691	13.7097	13.7227	13.8488	13.8989	13.8234	1.08204	0.174899
sll0102	sll0102	11	11	11	sll0102 hypothetical protein		1	11	11	11	33.5	33.5	33.5	40.096	358	16.7019	16.6756	16.6425	16.6733	16.5957	16.6561	16.6446	16.6321	0.971854	0.178378
sll0103	sll0103	13	13	13	sll0103 hypothetical protein		1	13	13	13	31.7	31.7	31.7	45.849	420	17.6444	17.6486	17.7224	17.6718	17.6762	17.702	17.7156	17.6979	1.01828	0.421751
sll0108	sll0108	3	3	3	sll0108 ammonium/methylammonium permease		1	3	3	3	9.7	9.7	9.7	53.58	507	17.0608	16.9947	16.8875	16.981	17.111	16.9765	17.0596	17.0491	1.04831	0.350341
sll0109	sll0109	2	2	2	sll0109 chorismate mutase		1	2	2	2	22.8	22.8	22.8	14.401	127	13.8358	13.783	13.8071	13.8086	13.7264	13.8077	13.8971	13.8104	1.00124	0.975152
sll0135	sll0135	7	7	7	sll0135 putative 5-methylthioadenosine phosphorylase		1	7	7	7	30.8	30.8	30.8	34.483	318	15.978	15.9855	16.0234	15.9956	15.8833	15.958	16.0338	15.9584	0.974511	0.487235
sll0136	sll0136	13	13	13	sll0136 aminopeptidase P		1	13	13	13	39.7	39.7	39.7	49.5	441	17.2516	17.2894	17.32	17.287	17.2483	17.2308	17.215	17.2314	0.962185	0.0885303
sll0141	sll0141	6	6	6	sll0141 hypothetical protein		1	6	6	6	13.7	13.7	13.7	50.992	467	14.3931	14.4271	14.3493	14.3899	14.827	14.8083	14.7944	14.8099	1.33795	0.000802427
sll0142	sll0142	7	7	7	sll0142 probable cation efflux system protein		1	7	7	7	6	6	6	115.19	1075	16.7045	16.7361	16.7762	16.7389	16.8471	16.9206	16.9299	16.8992	1.11748	0.00983957
sll0144	sll0144	8	8	8	sll0144 uridine monophosphate kinase		1	8	8	8	33.5	33.5	33.5	27.651	260	17.9192	17.8445	18.0412	17.935	17.8404	17.832	17.8675	17.8466	0.940577	0.261089
sll0145	sll0145	11	11	11	sll0145 ribosome releasing factor		1	11	11	11	51.1	51.1	51.1	20.186	182	17.7179	17.6773	17.6635	17.6862	17.6861	17.6335	17.68	17.6666	0.986474	0.446243
sll0147	sll0147	12	12	12	sll0147 hypothetical protein		1	12	12	12	20.7	20.7	20.7	76.269	668	17.1071	17.0953	17.1163	17.1062	17.0203	16.9821	17.0171	17.0065	0.933214	0.00573442
sll0148	sll0148	15	15	15	sll0148 hypothetical protein		1	15	15	15	28.7	28.7	28.7	78.5	735	17.3149	17.3708	17.5831	17.4229	17.5026	17.5765	17.6708	17.5833	1.11759	0.182953
sll0149	sll0149	12	12	12	sll0149 hypothetical protein		1	12	12	12	23.6	23.6	23.6	65.813	584	16.8487	16.8957	16.7033	16.8159	16.7103	16.7658	16.7081	16.7281	0.940935	0.265255
sll0154	sll0154	7	7	7	sll0154 hypothetical protein		1	7	7	7	16	16	16	51.007	462	16.5746	16.6604	16.7544	16.6631	16.7251	16.7883	16.7989	16.7708	1.07746	0.16235
sll0157	sll0157	3	3	3	sll0157 hypothetical protein		1	3	3	3	23.4	23.4	23.4	28.098	256	14.6745	14.7016	14.5778	14.6513	14.7145	14.6063	14.5334	14.618	0.977206	0.636722
sll0158	sll0158	24	24	24	sll0158 1,4-alpha-glucan branching enzyme		1	24	24	24	40.3	40.3	40.3	89.526	770	18.5729	18.5353	18.6302	18.5795	18.5707	18.5811	18.5768	18.5762	0.997714	0.915893
sll0160	sll0160	1	1	1	sll0160 hypothetical protein		1	1	1	1	3.6	3.6	3.6	25.73	224	11.3244	11.3849	11.6044	11.4379	11.4918	11.2419	11.4466	11.3934	0.969668	0.71827
sll0162	sll0162	9	9	9	sll0162 hypothetical protein		1	9	9	9	55.7	55.7	55.7	22.688	194	16.0593	16.1335	16.0913	16.0947	16.1279	16.0933	16.2319	16.151	1.0398	0.315873
sll0163	sll0163	30	30	30	sll0163 WD-repeat protein		1	30	30	30	18.9	18.9	18.9	189.93	1693	18.5803	18.5591	18.5877	18.5757	18.5826	18.55	18.5246	18.5524	0.983978	0.305189
sll0166	sll0166	10	10	10	sll0166 a fusion protein between uroporphyrinogen-III C-methyltransferase (CobA/CorA) and uroporphyrinogen-III synthase (HemD)		1	10	10	10	21.2	21.2	21.2	58.689	538	16.3874	16.3466	16.4881	16.4074	16.4853	16.5205	16.5293	16.5117	1.07501	0.120384
sll0167	sll0167	1	1	1	sll0167 unknown protein		1	1	1	1	10.4	10.4	10.4	17.865	164	14.1793	14.1447	14.3069	14.2103	13.9758	14.0529	14.0226	14.0171	0.874666	0.0421856
sll0168	sll0168	1	1	1	sll0168 hypothetical protein		1	1	1	1	15.3	15.3	15.3	12.373	111	9.15222	8.77991	9.04761	8.99325	8.95975	8.01612	8.45224	8.47604	0.698722	0.189351
sll0169	sll0169	13	13	13	sll0169 cell division protein Ftn2 homolog		1	13	13	13	21.6	21.6	21.6	79.423	714	17.6902	17.7085	17.7545	17.7177	17.7039	17.7425	17.7345	17.7269	1.00642	0.706172
sll0170	sll0170	34	34	33	sll0170 DnaK protein 2, heat shock protein 70, molecular chaperone		1	34	34	33	56	56	54.9	67.613	636	19.7944	19.8266	19.8188	19.8132	19.8608	19.8509	19.8464	19.8527	1.02772	0.0391305
sll0171	sll0171	7	7	7	sll0171 probable aminomethyltransferase		1	7	7	7	18.8	18.8	18.8	41.036	372	16.7533	16.7463	16.8024	16.7673	16.783	16.8161	16.8317	16.8102	1.03019	0.135473
sll0172	sll0172	3	3	3	sll0172 periplasmic protein, function unknown		1	3	3	3	25	25	25	16.347	152	14.7676	14.7235	14.831	14.7741	14.6833	14.6663	14.6579	14.6692	0.929881	0.0710042
sll0173	sll0173	7	7	7	sll0173 virginiamycin B hydrolase, periplasmic protein		1	7	7	7	29.8	29.8	29.8	38.545	352	16.9542	16.9133	16.9473	16.9383	16.9277	16.8668	16.9075	16.9007	0.974297	0.16963
sll0174	sll0174	1	1	1	sll0174 hypothetical protein		1	1	1	1	2.8	2.8	2.8	30.551	284	13.8936	13.9675	13.9327	13.9313	13.8539	13.7755	13.8115	13.8136	0.921674	0.019523
sll0175	sll0175	9	9	9	sll0175 hypothetical protein		1	9	9	9	15.4	15.4	15.4	59.249	540	17.7553	17.5995	18.1162	17.8237	17.8022	17.7607	17.8368	17.7999	0.983663	0.89144
sll0176	sll0176	5	5	5	sll0176 hypothetical protein		1	5	5	5	55.1	55.1	55.1	12.02	107	15.31	15.3668	15.241	15.3059	15.0824	15.2407	15.1928	15.172	0.911307	0.0909755
sll0178	sll0178	9	9	9	sll0178 hypothetical protein		1	9	9	9	6.8	6.8	6.8	151.89	1319	14.8353	14.8572	14.8811	14.8578	15.0543	15.0809	15.0273	15.0542	1.14577	0.000727073
sll0179	sll0179	10	10	10	sll0179 glutamyl-tRNA synthetase		1	10	10	10	22.2	22.2	22.2	54.008	483	16.6474	16.7333	16.6629	16.6812	16.6649	16.7395	16.746	16.7168	1.02498	0.391655
sll0180	sll0180	17	17	17	sll0180 hypothetical protein		1	17	17	17	43.9	43.9	43.9	53.966	501	17.7654	17.7917	17.7793	17.7788	17.6179	17.6711	17.7274	17.6721	0.928753	0.0705289
sll0182	sll0182	8	8	8	sll0182 ABC transporter ATP-binding protein		1	8	8	8	16.6	16.6	16.6	74.272	661	17.8124	17.7797	17.8157	17.8026	17.7266	17.6854	17.6257	17.6792	0.91806	0.038176
sll0183	sll0183	2	2	2	sll0183 hypothetical protein		1	2	2	2	9.7	9.7	9.7	27.402	259	13.5914	13.3393	14.0765	13.669	13.9347	13.8364	13.9173	13.8961	1.17046	0.404217
sll0184	sll0184	7	7	7	sll0184 group2 RNA polymerase sigma factor SigC		1	7	7	7	17.1	17.1	17.1	46.581	404	16.105	16.0544	16.0993	16.0862	16.0899	15.9312	16.0216	16.0142	0.951328	0.253622
sll0185	sll0185	14	14	14	sll0185 hypothetical protein		1	14	14	14	32.7	32.7	32.7	46.993	419	17.5206	17.4649	17.5048	17.4968	17.47	17.3607	17.3638	17.3982	0.933948	0.0940114
sll0188	sll0188	7	7	7	sll0188 unknown protein		1	7	7	7	20.2	20.2	20.2	52.391	501	15.9844	16.0366	16.0806	16.0339	16.1183	16.1443	16.0659	16.1095	1.05382	0.106858
sll0189	sll0189	1	1	1	sll0189 hypothetical protein		1	1	1	1	10.7	10.7	10.7	16.96	150	11.1877	11.4016	11.2127	11.2674	11.4839	11.2521	11.3759	11.3706	1.0742	0.338631
sll0191	sll0191	5	5	5	sll0191 unknown protein		1	5	5	5	16.9	16.9	16.9	28.923	249	16.4121	16.3666	16.4196	16.3994	16.3031	16.2831	16.2381	16.2748	0.917217	0.0084152
sll0192	sll0192	3	3	3	sll0192 hypothetical protein		1	3	3	3	6.4	6.4	6.4	46.318	423	14.5304	14.6272	14.5597	14.5724	14.6845	14.6333	14.6681	14.662	1.06404	0.0690362
sll0195	sll0195	2	2	2	sll0195 probable ATP-dependent protease		1	2	2	2	10.3	10.3	10.3	24.539	214	14.3008	14.324	14.9212	14.5154	14.4455	14.676	14.5441	14.5552	1.02799	0.866629
sll0198	sll0198	1	1	1	sll0198 hypothetical protein		1	1	1	1	5.8	5.8	5.8	21.336	191	13.2622	13.1415	13.2601	13.2212	13.2162	13.1531	13.1974	13.1889	0.977855	0.519158
sll0199	sll0199	5	5	5	sll0199 plastocyanin		1	5	5	5	61.1	61.1	61.1	13.146	126	19.6605	19.6043	19.5509	19.6052	19.6657	19.6147	19.5798	19.6201	1.01036	0.731691
sll0200;sll0650;sll0699;sll1256;sll1436;sll1983;slr0856;slr1715;slr1936;slr2112;slr7104;sll1397;slr1357;slr1075;slr0352;sll1998;sll0431;slr1524;slr8045;sll8043;slr0704;slr0230;ssr1175	sll0200;sll0650;sll0699;sll1256;sll1436;sll1983;slr0856;slr1715;slr1936;slr2112;slr7104;sll1397;slr1357;slr1075;slr0352;sll1998;sll0431;slr1524;slr8045;sll8043;slr0704;slr0230;ssr1175	6;6;6;6;6;6;6;6;6;6;6;5;5;5;5;5;5;5;5;5;4;4;4	6;6;6;6;6;6;6;6;6;6;6;5;5;5;5;5;5;5;5;5;4;4;4	6;6;6;6;6;6;6;6;6;6;6;5;5;5;5;5;5;5;5;5;4;4;4	sll0200 putative transposase [ISY100s: 2524547 - 2525492];sll0650 putative transposase [ISY100j: 421739 - 422684];sll0699 putative transposase [ISY100i: 123475 - 124420];sll1256 putative transposase [ISY100p: 1725405 - 1726350];sll1436 putative transposase		23	6	6	6	33.6	33.6	33.6	13.96	119	15.9121	15.9013	15.8171	15.8768	15.8372	15.7999	15.7783	15.8051	0.951537	0.124872
sll0202	sll0202	13	13	13	sll0202 glucose inhibited division protein		1	13	13	13	19.4	19.4	19.4	70.89	635	16.6812	16.6826	16.6162	16.66	16.7309	16.712	16.67	16.7043	1.03118	0.19574
sll0204	sll0204	7	7	7	sll0204 glucose inhibited division protein		1	7	7	7	16.7	16.7	16.7	50.102	456	14.697	14.6971	14.7802	14.7248	14.5698	14.6837	14.6157	14.6231	0.931949	0.0800305
sll0207	sll0207	7	7	7	sll0207 glucose-1-phosphate thymidylyltransferase		1	7	7	7	17.3	17.3	17.3	42.803	393	16.4375	16.5094	16.506	16.4843	16.6027	16.546	16.5357	16.5614	1.05493	0.0703344
sll0208	sll0208	8	8	8	sll0208 hypothetical protein		1	8	8	8	26.4	26.4	26.4	26.177	231	17.1091	17.1154	17.0449	17.0898	17.4637	17.3213	17.3615	17.3822	1.22467	0.00850761
sll0209	sll0209	10	10	10	sll0209 hypothetical protein		1	10	10	10	28.8	28.8	28.8	37.65	340	17.2199	17.2528	17.2586	17.2438	17.1043	17.0955	17.1077	17.1025	0.906729	0.00420863
sll0216	sll0216	2	2	2	sll0216 hypothetical protein		1	2	2	2	10	10	10	23.86	210	15.0956	15.1252	15.2636	15.1615	15.1488	15.1082	15.0796	15.1122	0.966438	0.449776
sll0219	sll0219	1	1	1	sll0219 flavoprotein		1	1	1	1	2.5	2.5	2.5	65.596	594	8.57699	9.363	9.01323	8.98441	9.40579	9.61658	9.95444	9.65894	1.59608	0.0795194
sll0220	sll0220	17	17	17	sll0220 L-glutamine:D-fructose-6-P amidotransferase		1	17	17	17	33.6	33.6	33.6	69.606	631	17.1505	17.1799	17.1637	17.1647	17.0885	17.1116	17.1038	17.1013	0.957018	0.00502746
sll0221	sll0221	4	4	4	sll0221 bacterioferritin comigratory protein		1	4	4	4	22.3	22.3	22.3	20.376	184	14.0522	14.0526	14.2243	14.1097	14.0359	13.9435	13.8911	13.9569	0.899474	0.104369
sll0222	sll0222	6	6	6	sll0222 putative purple acid phosphatase		1	6	6	6	25.8	25.8	25.8	36.013	326	17.2766	17.2307	17.1291	17.2122	17.3708	17.3131	17.3	17.328	1.0836	0.0996376
sll0223	sll0223	2	2	2	sll0223 NADH dehydrogenase subunit 2		1	2	2	2	3.3	3.3	3.3	55.354	521	14.3385	14.3611	14.2359	14.3118	14.6816	14.6571	14.6146	14.6511	1.2651	0.00446369
sll0224	sll0224	11	11	11	sll0224 amino-acid ABC transporter binding protein		1	11	11	11	44.6	44.6	44.6	32.829	298	17.5585	17.5912	17.6175	17.5891	17.8727	17.8454	17.8448	17.8543	1.20183	0.000749578
sll0226	sll0226	5	5	5	sll0226 photosystem I assembly related protein		1	5	5	5	25.5	25.5	25.5	20.453	188	14.6793	14.776	14.9345	14.7966	14.7764	14.8523	14.8584	14.829	1.02273	0.713856
sll0227	sll0227	7	7	7	sll0227 peptidyl-prolyl cis-trans isomerase B, periplasmic protein		1	7	7	7	32.1	32.1	32.1	26.58	246	16.9189	16.9059	17.0166	16.9472	16.9141	16.8944	16.8829	16.8971	0.965888	0.285986
sll0228	sll0228	5	5	5	sll0228 arginase		1	5	5	5	20.9	20.9	20.9	33.463	306	16.3569	16.4724	16.4779	16.4357	16.3262	16.437	16.419	16.3941	0.971525	0.470982
sll0230	sll0230	5	5	5	sll0230 hypothetical protein		1	5	5	5	61.4	61.4	61.4	10.944	101	15.6356	15.7592	15.6942	15.6963	15.6913	15.7751	15.7586	15.7416	1.03189	0.366236
sll0236	sll0236	14	14	14	sll0236 unknown protein		1	14	14	14	31.7	31.7	31.7	63.918	558	16.8801	16.9467	16.8598	16.8955	16.9458	16.9873	16.9063	16.9465	1.03593	0.221589
sll0237	sll0237	6	6	6	sll0237 unknown protein		1	6	6	6	14.9	14.9	14.9	37.029	343	16.1397	16.1885	16.1594	16.1625	16.2838	16.2377	16.2511	16.2575	1.06808	0.00853986
sll0242	sll0242	3	3	3	sll0242 unknown protein		1	3	3	3	4.2	4.2	4.2	102.32	929	15.8011	15.8213	16.037	15.8865	15.8463	15.8777	15.8868	15.8703	0.988853	0.851269
sll0243	sll0243	3	3	3	sll0243 unknown protein		1	3	3	3	5.5	5.5	5.5	46.721	416	14.746	14.8244	14.6445	14.7383	14.5221	14.5601	14.5062	14.5295	0.865234	0.046772
sll0244	sll0244	5	5	5	sll0244 UDP-glucose 4-epimerase		1	5	5	5	19.2	19.2	19.2	37.13	338	15.1609	15.0888	15.1088	15.1195	15.1414	15.0903	15.1284	15.1201	1.0004	0.983603
sll0245	sll0245	15	15	15	sll0245 probable GTP binding protein		1	15	15	15	54.8	54.8	54.8	39.317	363	18.2275	18.2116	18.2794	18.2395	18.153	18.1901	18.2036	18.1822	0.961085	0.0933067
sll0247	sll0247	3	3	3	sll0247 iron-stress chlorophyll-binding protein, homologous to psbC (CP43)		1	3	3	3	7.9	7.9	7.9	37.22	342	16.3145	16.2564	16.172	16.2476	15.6145	15.6429	15.6423	15.6333	0.653217	0.00314665
sll0248	sll0248	2	2	2	sll0248 flavodoxin		1	2	2	2	17.6	17.6	17.6	18.822	170	13.5856	13.6034	13.5695	13.5862	13.5818	13.4634	13.4402	13.4951	0.938837	0.168274
sll0250	sll0250	5	5	5	sll0250 pantothenate metabolism flavoprotein		1	5	5	5	14.4	14.4	14.4	43.419	402	16.702	16.6628	16.673	16.6793	16.6234	16.5951	16.5488	16.5891	0.939405	0.0340716
sll0253	sll0253	1	1	1	sll0253 hypothetical protein		1	1	1	1	5	5	5	20.143	179	14.6911	14.5663	14.5786	14.612	14.2918	14.3668	14.3538	14.3375	0.826711	0.00767376
sll0254	sll0254	9	9	9	sll0254 probable phytoene dehydrogenase Rieske iron-sulfur component		1	9	9	9	19.8	19.8	19.8	71.843	650	15.1951	15.2343	15.2569	15.2287	15.0419	15.0656	15.1989	15.1021	0.915994	0.109023
sll0258	sll0258	9	9	9	sll0258 cytochrome c550		1	9	9	9	69.4	69.4	69.4	17.884	160	18.6046	18.5611	18.5701	18.5786	18.6277	18.6002	18.668	18.6319	1.03768	0.097467
sll0260	sll0260	5	5	5	sll0260 hypothetical protein		1	5	5	5	15.2	15.2	15.2	49.227	448	14.967	14.9455	15.0078	14.9734	15.0031	14.9524	14.9465	14.9674	0.995804	0.824309
sll0261	sll0261	1	1	1	sll0261 hypothetical protein		1	1	1	1	2.1	2.1	2.1	62.291	568	11.6153	11.9257	11.8678	11.8029	11.8447	11.8281	11.7658	11.8128	1.0069	0.927872
sll0262	sll0262	1	1	1	sll0262 acyl-lipid desaturase (delta 6)		1	1	1	1	3.6	3.6	3.6	41.424	359	13.9524	13.8415	13.8452	13.8797	14.1055	13.9769	13.9298	14.004	1.08999	0.13221
sll0263	sll0263	2	2	2	sll0263 unknown protein		1	2	2	2	12.1	12.1	12.1	27.311	239	13.0204	12.8776	13.1664	13.0215	12.8227	12.5365	12.734	12.6978	0.798997	0.0526849
sll0264	sll0264	1	1	1	sll0264 probable dioxygenase Rieske iron-sulfur component		1	1	1	1	4.4	4.4	4.4	41.099	362	12.0466	12.2947	12.2793	12.2069	12.1864	12.2354	12.4071	12.2763	1.0493	0.543904
sll0267	sll0267	8	8	8	sll0267 unknown protein		1	8	8	8	4.8	4.8	4.8	173.63	1533	15.0304	15.119	15.0744	15.0746	15.1044	15.1769	15.1242	15.1352	1.04289	0.146693
sll0268	sll0268	3	3	3	sll0268 hypothetical protein		1	3	3	3	23	23	23	14.362	135	13.8477	13.9938	14.2747	14.0388	13.8541	13.9428	14.0143	13.9371	0.931928	0.510913
sll0269	sll0269	2	2	2	sll0269 hypothetical protein		1	2	2	2	21.2	21.2	21.2	14.97	137	16.2654	16.2507	16.2343	16.2501	16.0824	16.149	16.1715	16.1343	0.922856	0.0382599
sll0271	sll0271	13	13	12	sll0271 N utilization substance protein B homolog		1	13	13	12	50.2	50.2	47.6	30.59	275	17.0525	17.1363	17.1841	17.1243	17.1195	17.1935	17.2354	17.1828	1.0414	0.318301
sll0272	sll0272	3	3	3	sll0272 hypothetical protein		1	3	3	3	41.1	41.1	41.1	15.78	141	13.6424	13.7945	13.6261	13.6877	13.7951	13.7573	13.8086	13.787	1.07127	0.198946
sll0273	sll0273	6	6	6	sll0273 Na+/H+ antiporter		1	6	6	6	9.6	9.6	9.6	58.116	540	15.9176	15.9259	15.9097	15.9177	16.0141	16.0003	16.2462	16.0869	1.12437	0.167597
sll0274	sll0274	7	7	7	sll0274 hypothetical protein		1	7	7	7	37.8	37.8	37.8	21.473	196	16.4902	16.5011	16.4442	16.4785	16.4591	16.4616	16.4764	16.4657	0.991131	0.543823
sll0280	sll0280	1	1	1	sll0280 unknown protein		1	1	1	1	3.5	3.5	3.5	43.226	367	11.959	12.1705	12.7941	12.3079	12.1925	12.2697	12.4543	12.3055	0.998374	0.993558
sll0281	sll0281	4	4	4	sll0281 unknown protein		1	4	4	4	10	10	10	43.031	390	14.9428	14.8389	14.9907	14.9242	14.83	14.8274	14.7794	14.8123	0.925377	0.116959
sll0283	sll0283	7	7	7	sll0283 hypothetical protein		1	7	7	7	20.4	20.4	20.4	47.541	412	16.1887	16.1462	16.0814	16.1388	16.0789	16.1549	16.1139	16.1159	0.984277	0.584694
sll0284	sll0284	5	5	5	sll0284 hypothetical protein		1	5	5	5	10.4	10.4	10.4	64.697	579	15.3453	15.4109	15.4401	15.3988	15.6003	15.595	15.6003	15.5985	1.14851	0.0187955
sll0286	sll0286	2	2	2	sll0286 hypothetical protein YCF52		1	2	2	2	19.9	19.9	19.9	19.788	171	13.9692	14.0056	13.9914	13.9887	13.9628	13.9618	13.9958	13.9735	0.989481	0.378102
sll0288	sll0288	8	8	8	sll0288 septum site-determining protein MinC		1	8	8	8	34	34	34	26.841	247	16.9592	16.9122	16.8311	16.9008	16.8415	16.8364	16.8476	16.8418	0.959924	0.254986
sll0289	sll0289	10	10	10	sll0289 septum site-determining protein MinD		1	10	10	10	46.6	46.6	46.6	29.047	266	16.6905	16.7115	16.6085	16.6702	16.6819	16.6444	16.6408	16.6557	0.990001	0.702156
sll0290	sll0290	23	23	23	sll0290 polyphosphate kinase		1	23	23	23	37.6	37.6	37.6	82.606	728	18.3709	18.4063	18.3602	18.3791	17.9288	17.959	17.8577	17.9152	0.724997	0.00107202
sll0293	sll0293	2	2	2	sll0293 unknown protein		1	2	2	2	14.1	14.1	14.1	18.583	170	16.128	16.1454	16.2432	16.1722	16.1657	16.1093	16.1167	16.1306	0.971578	0.376453
sll0294	sll0294	2	2	2	sll0294 hypothetical protein		1	2	2	2	6.5	6.5	6.5	45.574	400	10.8864	10.8044	11.3525	11.0144	10.8461	10.5067	10.9534	10.7687	0.843408	0.324701
sll0295	sll0295	3	3	3	sll0295 hypothetical protein		1	3	3	3	11.2	11.2	11.2	31.248	268	14.9508	14.9607	14.9151	14.9422	14.8587	14.8274	14.7756	14.8206	0.919171	0.019798
sll0296	sll0296	2	2	2	sll0296 hypothetical protein		1	2	2	2	11.3	11.3	11.3	20.996	186	12.7859	12.8766	12.7927	12.8184	12.8425	12.7494	12.747	12.7796	0.973474	0.417181
sll0300	sll0300	3	3	3	sll0300 riboflavin synthase alpha chain		1	3	3	3	11.1	11.1	11.1	24.378	226	14.5187	14.5108	14.701	14.5768	14.5973	14.5295	14.556	14.5609	0.989029	0.826368
sll0301	sll0301	6	6	6	sll0301 hypothetical protein		1	6	6	6	37.3	37.3	37.3	18.611	169	16.8639	16.8683	16.7767	16.8363	17.0076	16.8906	16.871	16.9231	1.06199	0.179213
sll0306	sll0306	12	12	11	sll0306 RNA polymerase group 2 sigma factor		1	12	12	11	33.6	33.6	31.3	39.354	345	16.6063	16.5868	16.6285	16.6072	16.7804	16.6656	16.6991	16.7151	1.07763	0.0737215
sll0309	sll0309	2	2	2	sll0309 unknown protein		1	2	2	2	9.9	9.9	9.9	26.949	232	13.7809	13.6704	13.7569	13.7361	13.7743	13.5759	13.6657	13.672	0.956546	0.401455
sll0312	sll0312	5	5	5	sll0312 probable oligopeptides ABC transporter permease protein		1	5	5	5	13.4	13.4	13.4	37.906	337	15.4681	15.4844	15.4688	15.4738	15.5015	15.4966	15.4902	15.4961	1.0156	0.0319754
sll0314	sll0314	10	10	10	sll0314 periplasmic protein, function unknown		1	10	10	10	34.7	34.7	34.7	35.444	314	16.3608	16.3669	16.3978	16.3752	16.5731	16.4768	16.4339	16.4946	1.08632	0.0917815
sll0318	sll0318	4	4	4	sll0318 hypothetical protein		1	4	4	4	21.7	21.7	21.7	24.151	212	14.9985	15.0878	15.095	15.0605	15.0287	15.0441	15.1419	15.0716	1.00773	0.8254
sll0319	sll0319	7	7	7	sll0319 periplasmic protein, function unknown		1	7	7	7	32.7	32.7	32.7	32.315	297	15.6648	15.7729	15.7863	15.7414	16.136	16.0751	16.1302	16.1138	1.29452	0.0034437
sll0320	sll0320	6	6	6	sll0320 probable ribonuclease D		1	6	6	6	33.6	33.6	33.6	24.403	217	16.2676	16.2856	16.3426	16.2986	16.2546	16.2605	16.2983	16.2711	0.981127	0.368673
sll0321	sll0321	3	3	3	sll0321 unknown protein		1	3	3	3	6	6	6	56.04	498	12.9266	13.2046	12.9136	13.0149	12.7811	13.1995	13.2643	13.0817	1.04733	0.731284
sll0325	sll0325	8	8	8	sll0325 hypothetical protein		1	8	8	8	19.4	19.4	19.4	55.546	496	16.0777	16.0419	16.1431	16.0876	16.0075	15.9758	16.0102	15.9978	0.9397	0.0796784
sll0328	sll0328	1	1	1	sll0328 unknown protein		1	1	1	1	5	5	5	15.712	139	14.8247	14.8792	14.959	14.8876	15.4162	15.29	15.3005	15.3356	1.36411	0.00134806
sll0329	sll0329	14	14	14	sll0329 6-phosphogluconate dehydrogenase		1	14	14	14	38.8	38.8	38.8	52.873	482	17.9734	18.0121	18.0736	18.0197	18.0251	18.0169	18.0375	18.0265	1.00472	0.839357
sll0335	sll0335	11	11	11	sll0335 hypothetical protein		1	11	11	11	28.5	28.5	28.5	53.732	481	16.2149	16.1307	16.2471	16.1976	15.9874	15.9965	15.9519	15.9786	0.859191	0.0145068
sll0336	sll0336	10	10	10	sll0336 acetyl-CoA carboxylase beta subunit		1	10	10	10	36.2	36.2	36.2	36.396	326	17.934	17.8778	18.0089	17.9402	17.8986	17.8895	17.8488	17.879	0.958424	0.243373
sll0337	sll0337	7	7	7	sll0337 phosphate sensor, two-component sensor histidine kinase		1	7	7	7	16.2	16.2	16.2	43.634	383	15.7255	15.7516	15.7237	15.7336	15.6349	15.6079	15.6631	15.6353	0.934126	0.0110868
sll0350	sll0350	4	4	4	sll0350 hypothetical protein		1	4	4	4	7.1	7.1	7.1	87.543	803	13.7579	13.7841	13.8071	13.783	13.8226	13.8432	13.9121	13.8593	1.05428	0.0875936
sll0359	sll0359	8	8	8	sll0359 hypothetical protein		1	8	8	8	64.1	64.1	64.1	14.082	128	19.0403	19.008	18.965	19.0044	19.009	19.0001	19.1322	19.0471	1.03002	0.438731
sll0360	sll0360	1	1	1	sll0360 hypothetical protein		1	1	1	1	5.1	5.1	5.1	30.733	277	14.765	14.7768	14.725	14.7556	14.4213	14.4977	14.5054	14.4748	0.823139	0.00214826
sll0361	sll0361	5	5	5	sll0361 hypothetical protein		1	5	5	5	44.2	44.2	44.2	17.187	156	15.3304	15.432	15.3131	15.3585	15.3464	15.3617	15.4091	15.3724	1.00966	0.760834
sll0362	sll0362	26	26	26	sll0362 alanyl-tRNA synthetase		1	26	26	26	31.5	31.5	31.5	96.14	877	18.5961	18.6014	18.6629	18.6201	18.6518	18.622	18.6271	18.6337	1.00941	0.606714
sll0368	sll0368	11	11	11	sll0368 uracil phosphoribosyltransferase		1	11	11	11	66.9	66.9	66.9	19.946	178	17.6834	17.7123	17.6723	17.6893	17.6424	17.6925	17.6599	17.6649	0.983232	0.269043
sll0369	sll0369	2	2	2	sll0369 unknown protein		1	2	2	2	10.6	10.6	10.6	15.913	142	14.5404	14.6131	14.6614	14.605	14.6207	14.7689	14.6836	14.6911	1.06149	0.198586
sll0370	sll0370	36	36	36	sll0370 carbamoyl-phosphate synthase, pyrimidine-specific, large chain		1	36	36	36	36.8	36.8	36.8	121.62	1105	19.2155	19.2413	19.266	19.2409	19.1437	19.1747	19.2128	19.1771	0.956714	0.0669005
sll0373	sll0373	10	10	10	sll0373 gamma-glutamyl phosphate reductase		1	10	10	10	27.3	27.3	27.3	46.349	433	17.1122	17.09	17.0954	17.0992	17.1831	17.1684	17.1608	17.1707	1.05084	0.00156917
sll0374	sll0374	6	6	6	sll0374 urea transport system ATP-binding protein		1	6	6	6	24.9	24.9	24.9	27.424	249	15.3082	15.2942	15.2817	15.2947	15.2467	15.2727	15.278	15.2658	0.980156	0.0826026
sll0376	sll0376	1	1	1	sll0376 unknown protein		1	1	1	1	11.9	11.9	11.9	11.372	101	10.4196	10.5294	10.4201	10.4564	10.502	10.7576	10.5488	10.6028	1.10684	0.195214
sll0377	sll0377	30	30	30	sll0377 transcription-repair coupling factor		1	30	30	30	27.6	27.6	27.6	130.48	1162	17.954	17.9671	18.0161	17.9791	17.9328	17.932	17.964	17.943	0.975281	0.189817
sll0379	sll0379	9	9	9	sll0379 acyl-[acyl-carrier-protein]--UDP-N-acetylglucosamine o-acyltransferase		1	9	9	9	38	38	38	32.073	295	15.9775	16.0899	16.0655	16.0443	16.1678	16.14	16.1532	16.1537	1.07878	0.0781014
sll0380	sll0380	2	2	2	sll0380 probable glycosyltransferase		1	2	2	2	8.2	8.2	8.2	41.173	365	12.8031	12.8841	12.7801	12.8225	12.8033	12.8177	12.7066	12.7759	0.96821	0.378233
sll0381	sll0381	5	5	5	sll0381 hypothetical protein		1	5	5	5	17.3	17.3	17.3	30.985	294	16.249	16.2674	16.2968	16.271	16.4713	16.4452	16.4395	16.452	1.13362	0.000770412
sll0383	sll0383	1	1	1	sll0383 cobalamin biosynthesis protein M		1	1	1	1	4.7	4.7	4.7	22.798	214	12.0337	11.7973	12.1286	11.9865	12.1186	12.1252	12.028	12.0906	1.0748	0.404459
sll0384	sll0384	1	1	1	sll0384 unknown protein		1	1	1	1	3.1	3.1	3.1	28.752	257	11.4238	11.26	11.4187	11.3675	11.516	11.5529	11.6156	11.5615	1.14392	0.0485699
sll0385	sll0385	2	2	2	sll0385 ATP-binding protein of ABC transporter		1	2	2	2	11.6	11.6	11.6	30.854	284	11.7831	12.0025	11.875	11.8868	11.63	11.7904	11.8488	11.7564	0.913552	0.226164
sll0394	sll0394	2	2	2	sll0394 unknown protein		1	2	2	2	12.5	12.5	12.5	22.731	208	13.5818	13.6313	13.5274	13.5802	13.7361	13.5706	13.6153	13.6407	1.04283	0.365974
sll0395	sll0395	7	7	7	sll0395 phosphoglycerate mutase		1	7	7	7	36.3	36.3	36.3	23.752	212	16.8931	16.9318	16.9606	16.9285	17.0001	16.8857	16.9712	16.9523	1.01665	0.587022
sll0396	sll0396	7	7	7	sll0396 two-component response regulator OmpR subfamily		1	7	7	7	32.6	32.6	32.6	25.97	224	17.0499	17.0182	17.0336	17.0339	17.0465	17.0355	17.0358	17.0393	1.00375	0.62672
sll0400	sll0400	2	2	2	sll0400 hypothetical protein		1	2	2	2	14	14	14	18.27	164	13.4521	13.5328	13.2783	13.4211	13.4038	13.4897	13.3991	13.4308	1.00678	0.912555
sll0401	sll0401	9	9	9	sll0401 citrate synthase		1	9	9	9	22.8	22.8	22.8	44.422	394	17.003	16.9522	17.0036	16.9863	17.0034	16.902	16.9114	16.9389	0.96773	0.285516
sll0402	sll0402	14	14	14	sll0402 aspartate aminotransferase		1	14	14	14	47.3	47.3	47.3	42.352	389	17.2436	17.279	17.2442	17.2556	17.2495	17.2458	17.2414	17.2456	0.993089	0.483914
sll0404	sll0404	11	11	11	sll0404 glycolate oxidase subunit GlcD		1	11	11	11	28.7	28.7	28.7	53.032	492	16.5238	16.5399	16.5286	16.5308	16.577	16.5808	16.5357	16.5645	1.02364	0.133912
sll0405	sll0405	2	2	2	sll0405 unknown protein		1	2	2	2	6.1	6.1	6.1	28.985	261	13.8544	13.8311	13.9221	13.8692	14.0258	13.8875	13.8624	13.9252	1.03959	0.401602
sll0406	sll0406	4	4	4	sll0406 unknown protein		1	4	4	4	28.6	28.6	28.6	18.248	161	14.2615	14.3833	14.2945	14.3131	14.3605	14.313	14.4378	14.3704	1.04055	0.327191
sll0408	sll0408	14	14	14	sll0408 peptidyl-prolyl cis-trans isomerase		1	14	14	14	41.8	41.8	41.8	43.909	402	18.7506	18.7535	18.6635	18.7225	18.7093	18.7414	18.7103	18.7203	0.998469	0.948999
sll0409	sll0409	2	2	2	sll0409 similar to O-succinylbenzoate-CoA synthase		1	2	2	2	5.9	5.9	5.9	35.633	320	12.2331	12.317	12.4204	12.3235	12.4097	12.389	12.4556	12.4181	1.06776	0.216273
sll0410	sll0410	4	4	4	sll0410 hypothetical protein		1	4	4	4	22.3	22.3	22.3	18.873	166	15.1945	15.211	15.1425	15.1827	15.3016	15.176	15.1878	15.2218	1.02751	0.449047
sll0412	sll0412	4	4	4	sll0412 hypothetical protein		1	4	4	4	9.5	9.5	9.5	47.506	419	14.7942	14.8488	14.8745	14.8392	14.8435	14.8055	14.8326	14.8272	0.991754	0.68103
sll0413	sll0413	4	4	4	sll0413 hypothetical protein		1	4	4	4	16.9	16.9	16.9	23.086	207	14.9659	14.9939	15.1015	15.0204	15.0832	15.0685	15.0498	15.0672	1.03293	0.375964
sll0414	sll0414	13	13	13	sll0414 hypothetical protein		1	13	13	13	53.5	53.5	53.5	31.501	286	17.9903	18.0229	17.9918	18.0017	17.8313	17.8623	17.8367	17.8434	0.896114	0.000399796
sll0415	sll0415	3	3	3	sll0415 ATP-binding protein of ABC transporter		1	3	3	3	12.1	12.1	12.1	39.5	354	14.6884	14.6094	14.5994	14.6324	14.4826	14.4798	14.7526	14.5717	0.958781	0.577808
sll0416	sll0416	29	29	29	sll0416 60 kDa chaperonin 2, GroEL2, molecular chaperone		1	29	29	29	61.2	61.2	61.2	57.774	552	19.655	19.6685	19.735	19.6862	19.6573	19.6778	19.7323	19.6892	1.00205	0.933794
sll0418	sll0418	5	5	5	sll0418 2-methyl-6-phytylbenzoquinone methyltransferase		1	5	5	5	15.1	15.1	15.1	34.947	318	16.3937	16.3664	16.4341	16.3981	16.3729	16.4351	16.4292	16.4124	1.01	0.634082
sll0420	sll0420	4	4	4	sll0420 urease beta subunit		1	4	4	4	48.6	48.6	48.6	11.382	105	15.7201	15.6933	15.8128	15.7421	15.8833	15.8906	15.8985	15.8908	1.1086	0.0524874
sll0421	sll0421	18	18	18	sll0421 adenylosuccinate lyase		1	18	18	18	45	45	45	48.42	431	18.6127	18.5999	18.7366	18.6498	18.6968	18.6847	18.6427	18.6747	1.01745	0.635047
sll0422	sll0422	14	14	14	sll0422 asparaginase		1	14	14	14	50.2	50.2	50.2	34.894	329	18.7204	18.6706	18.5979	18.663	18.7488	18.6875	18.6641	18.7002	1.02611	0.446747
sll0424	sll0424	5	5	5	sll0424 hypothetical protein		1	5	5	5	8.6	8.6	8.6	59.38	534	14.7558	14.8353	14.8994	14.8302	14.7408	14.6993	14.7326	14.7242	0.929197	0.115273
sll0426	sll0426	1	1	1	sll0426 unknown protein		1	1	1	1	9.2	9.2	9.2	13.331	120	10.681	10.9407	10.5305	10.7174	10.6123	10.4555	10.5822	10.55	0.890472	0.296951
sll0427	sll0427	11	11	11	sll0427 photosystem II manganese-stabilizing polypeptide		1	11	11	11	64.6	64.6	64.6	29.911	274	19.6407	19.619	19.5413	19.6003	19.4557	19.4511	19.4604	19.4557	0.904626	0.0399292
sll0430	sll0430	28	28	28	sll0430 HtpG, heat shock protein 90, molecular chaperone		1	28	28	28	50.5	50.5	50.5	75.029	658	18.4262	18.3733	18.347	18.3822	18.3809	18.3613	18.3562	18.3661	0.988933	0.568524
sll0436	sll0436	4	4	4	sll0436 hypothetical protein		1	4	4	4	23.8	23.8	23.8	17.447	151	16.845	16.8834	16.856	16.8615	16.8483	16.8379	16.7333	16.8065	0.962603	0.269905
sll0441	sll0441	11	11	11	sll0441 unknown protein		1	11	11	11	27.4	27.4	27.4	53.885	460	16.3701	16.415	16.357	16.3807	16.3361	16.3943	16.3409	16.3571	0.983768	0.409026
sll0443	sll0443	12	12	12	sll0443 unknown protein		1	12	12	12	32.4	32.4	32.4	51.061	469	17.092	17.1395	17.156	17.1292	17.2994	17.2802	17.3013	17.2936	1.12076	0.00756978
sll0445	sll0445	6	6	6	sll0445 unknown protein		1	6	6	6	12.3	12.3	12.3	54.394	495	16.6574	16.6196	16.7977	16.6915	16.7478	16.6817	16.6966	16.7087	1.01197	0.788926
sll0446	sll0446	33	33	33	sll0446 unknown protein		1	33	33	33	36.8	36.8	36.8	120.98	1072	18.2886	18.3526	18.1935	18.2782	18.4492	18.475	18.4914	18.4719	1.14363	0.0447082
sll0447	sll0447	9	9	9	sll0447 unknown protein		1	9	9	9	36.1	36.1	36.1	28.065	241	17.4438	17.3745	17.3993	17.4059	17.6426	17.5545	17.5379	17.5783	1.127	0.0160467
sll0448	sll0448	1	1	1	sll0448 unknown protein		1	1	1	1	2	2	2	45.112	401	13.0256	13.0701	13.2546	13.1168	13.5423	13.4234	13.3865	13.4507	1.26044	0.0216728
sll0449	sll0449	3	3	3	sll0449 unknown protein		1	3	3	3	8.6	8.6	8.6	42.661	372	15.156	15.1843	15.1717	15.1707	15.4723	15.488	15.5099	15.4901	1.24779	3.5539e-05
sll0450	sll0450	2	2	2	sll0450 cytochrome b subunit of nitric oxide reductase		1	2	2	2	4.3	4.3	4.3	81.292	736	13.8169	13.7049	13.9271	13.8163	13.4661	13.4628	13.3566	13.4285	0.764289	0.0117905
sll0451	sll0451	3	3	3	sll0451 hypothetical protein		1	3	3	3	21.4	21.4	21.4	17.612	154	14.6744	14.8028	14.609	14.6954	14.7132	14.6778	14.7325	14.7079	1.00869	0.84998
sll0454	sll0454	15	15	15	sll0454 phenylalanyl-tRNA synthetase alpha chain		1	15	15	15	52	52	52	37.124	331	17.6178	17.7014	17.6641	17.6611	17.5144	17.5158	17.7881	17.6061	0.962597	0.61184
sll0455	sll0455	7	7	7	sll0455 homoserine dehydrogenase		1	7	7	7	17.3	17.3	17.3	45.486	433	16.4573	16.4004	16.4154	16.4244	16.4627	16.3851	16.3855	16.4111	0.990857	0.693525
sll0456	sll0456	6	6	6	sll0456 hypothetical protein		1	6	6	6	23.1	23.1	23.1	37.436	333	16.8994	17.0348	16.4743	16.8028	16.5584	16.671	16.6304	16.6199	0.880935	0.392296
sll0459	sll0459	24	24	24	sll0459 excinuclease ABC subunit B		1	24	24	24	36.6	36.6	36.6	76.848	669	17.3231	17.2885	17.3984	17.3367	17.2983	17.2652	17.3657	17.3097	0.981522	0.573327
sll0461	sll0461	10	10	10	sll0461 gamma-glutamyl phosphate reductase		1	10	10	10	25.2	25.2	25.2	45.772	420	16.8146	16.811	16.8379	16.8212	16.8765	16.8813	16.8456	16.8678	1.03283	0.0327179
sll0462	sll0462	1	1	1	sll0462 hypothetical protein		1	1	1	1	5.7	5.7	5.7	40.73	366	13.0776	12.9456	12.9074	12.9769	13.0382	13.0543	12.6599	12.9175	0.959674	0.701388
sll0467	sll0467	5	5	5	sll0467 S-adenosylmethionine:tRNA ribosyltransferase-isomerase		1	5	5	5	16.1	16.1	16.1	41.186	366	15.0718	15.0482	15.0509	15.057	15.1756	15.1016	15.1253	15.1342	1.05496	0.0589246
sll0469	sll0469	12	12	12	sll0469 ribose-phosphate pyrophosphokinase		1	12	12	12	49.2	49.2	49.2	36.395	333	17.1006	17.1375	17.3225	17.1869	17.1122	17.1618	17.1892	17.1544	0.977714	0.68982
sll0470	sll0470	4	4	4	sll0470 hypothetical protein		1	4	4	4	24.2	24.2	24.2	20.719	186	14.8608	14.8979	14.7334	14.8307	14.5502	14.4703	14.506	14.5089	0.800057	0.0117278
sll0471	sll0471	3	3	3	sll0471 hypothetical protein		1	3	3	3	5.4	5.4	5.4	76.398	684	14.8477	14.9609	15.0585	14.9557	15.2442	15.2893	15.2489	15.2608	1.23549	0.0319783
sll0477	sll0477	3	3	3	sll0477 putative biopolymer transport ExbB-like protein		1	3	3	3	9.4	9.4	9.4	28.18	254	14.8967	15.0326	15.1988	15.0427	15.1177	15.1613	15.5833	15.2874	1.18486	0.244177
sll0480	sll0480	15	15	15	sll0480 probable aminotransferase		1	15	15	15	47.6	47.6	47.6	45.087	412	18.4854	18.4679	18.4685	18.4739	18.4365	18.4358	18.4206	18.431	0.970646	0.00528364
sll0481	sll0481	1	1	1	sll0481 unknown protein		1	1	1	1	6.5	6.5	6.5	17.362	155	13.8658	13.9858	13.8398	13.8971	13.6258	13.7515	13.6411	13.6728	0.855998	0.0206454
sll0482	sll0482	7	7	7	sll0482 unknown protein		1	7	7	7	21.8	21.8	21.8	42.959	385	15.6672	15.5936	15.8309	15.6973	15.6603	15.6628	15.7163	15.6798	0.987985	0.829907
sll0484	sll0484	4	4	4	sll0484 ATP-binding protein of ABC transporter		1	4	4	4	19.2	19.2	19.2	26.671	245	14.7265	14.7099	14.7671	14.7345	14.6981	14.5806	14.5744	14.6177	0.922241	0.0847652
sll0485	sll0485	6	6	6	sll0485 two-component response regulator NarL subfamily		1	6	6	6	17.1	17.1	17.1	34.124	299	15.7817	15.7823	15.7918	15.7853	15.8134	15.7097	15.7353	15.7528	0.977733	0.4068
sll0486	sll0486	2	2	2	sll0486 circadian clock protein KaiB homolog		1	2	2	2	18.6	18.6	18.6	11.657	102	14.3472	14.3916	14.5426	14.4271	14.3363	14.4539	14.4317	14.4073	0.986373	0.792027
sll0487	sll0487	11	11	11	sll0487 hypothetical protein		1	11	11	11	25.9	25.9	25.9	45.847	402	16.6512	16.6203	16.6565	16.6427	16.7452	16.6978	16.6835	16.7088	1.04693	0.0498614
sll0488	sll0488	3	3	3	sll0488 hypothetical protein		1	3	3	3	12.8	12.8	12.8	22.628	203	14.7972	14.7769	14.7631	14.7791	14.6489	14.6637	14.6486	14.6537	0.916779	0.00160185
sll0489	sll0489	6	6	6	sll0489 ATP-binding protein of ABC transporter		1	6	6	6	21.9	21.9	21.9	37.931	342	15.7249	15.6585	15.6957	15.693	15.7872	15.6914	15.7035	15.7274	1.02409	0.399459
sll0493	sll0493	8	8	8	sll0493 hypothetical protein		1	8	8	8	40.8	40.8	40.8	25.169	228	15.7916	15.8427	15.8579	15.8307	15.7651	15.8255	15.7965	15.7957	0.976004	0.258845
sll0495	sll0495	19	19	19	sll0495 asparaginyl-tRNA synthetase		1	19	19	19	45	45	45	58.045	513	18.4213	18.4009	18.4205	18.4143	18.4189	18.4337	18.4356	18.4294	1.01057	0.152821
sll0496	sll0496	2	2	2	sll0496 hypothetical protein		1	2	2	2	4.8	4.8	4.8	44.35	394	12.9273	12.8001	12.9348	12.8874	13.2059	13.0785	13.0237	13.1027	1.16097	0.0383162
sll0497	sll0497	10	10	10	sll0497 hypothetical protein		1	10	10	10	46.2	46.2	46.2	31.477	275	15.6898	15.6339	15.6756	15.6664	15.6771	15.678	15.5983	15.6511	0.989447	0.654808
sll0498	sll0498	5	5	5	sll0498 hypothetical protein		1	5	5	5	35.3	35.3	35.3	16.655	150	17.7001	17.5921	17.3403	17.5442	17.4648	17.4419	17.4032	17.4366	0.928156	0.419716
sll0499	sll0499	16	16	16	sll0499 hypothetical protein		1	16	16	16	21.3	21.3	21.3	104.85	948	17.0422	17.104	17.1991	17.1151	17.1465	17.2571	17.2248	17.2095	1.06762	0.175607
sll0501	sll0501	4	4	4	sll0501 probable glycosyltransferase		1	4	4	4	12.6	12.6	12.6	36.667	318	14.557	14.5926	14.4294	14.5264	14.3725	14.4429	14.3997	14.405	0.919338	0.119677
sll0502	sll0502	19	19	19	sll0502 arginyl-tRNA-synthetase		1	19	19	19	35.1	35.1	35.1	65.212	584	17.4458	17.4937	17.5219	17.4871	17.4634	17.4918	17.5466	17.5006	1.0094	0.703729
sll0504	sll0504	13	13	13	sll0504 diaminopimelate decarboxylase		1	13	13	13	31.3	31.3	31.3	50.847	469	17.2393	17.1937	17.1482	17.1937	17.2465	17.2034	17.2488	17.2329	1.02752	0.280913
sll0505	sll0505	4	4	4	sll0505 hypothetical protein		1	4	4	4	13.5	13.5	13.5	33.599	303	13.7883	13.7799	13.8268	13.7983	13.9183	13.9475	13.9454	13.9371	1.10095	0.00239487
sll0506	sll0506	7	7	7	sll0506 undecaprenyl pyrophosphate synthetase		1	7	7	7	35.3	35.3	35.3	28.823	249	15.9137	15.886	15.9202	15.9066	15.8349	15.8041	15.8236	15.8209	0.942275	0.00370288
sll0507	sll0507	9	9	9	sll0507 probable cation transporter		1	9	9	9	28.7	28.7	28.7	45.305	387	16.3476	16.3364	16.4104	16.3648	16.1389	16.1954	16.1986	16.1776	0.878318	0.00374379
sll0508	sll0508	3	3	3	sll0508 unknown protein		1	3	3	3	18.2	18.2	18.2	19.582	170	14.7417	14.6903	14.6831	14.705	14.6091	14.6953	14.5344	14.613	0.938175	0.176308
sll0509	sll0509	6	6	6	sll0509 similar to 5,5-P-1,P-4-tetraphosphate phosphorylase II		1	6	6	6	24.2	24.2	24.2	33.898	302	16.52	16.6057	16.8319	16.6526	16.5871	16.5724	16.6258	16.5951	0.960939	0.601373
sll0513	sll0513	5	5	5	sll0513 hypothetical protein		1	5	5	5	21.7	21.7	21.7	31.151	277	16.8222	16.7987	17.0802	16.9004	16.9403	17.0012	16.9854	16.9756	1.05354	0.493667
sll0514	sll0514	4	4	4	sll0514 hypothetical protein		1	4	4	4	9.4	9.4	9.4	62.41	554	14.5774	14.5053	14.955	14.6792	14.4003	14.5991	14.5745	14.5246	0.898375	0.391654
sll0517	sll0517	3	1	1	sll0517 putative RNA binding protein		1	3	1	1	17.8	9.9	9.9	10.962	101	12.423	12.4297	12.3105	12.3877	12.7673	12.614	12.7709	12.7174	1.25672	0.00853108
sll0518	sll0518	15	15	15	sll0518 unknown protein		1	15	15	15	54.3	54.3	54.3	43.118	385	17.9741	17.9349	17.9964	17.9685	18.0457	18.0026	17.9829	18.0104	1.02947	0.180063
sll0519	sll0519	2	2	2	sll0519 NADH dehydrogenase subunit 1		1	2	2	2	7.3	7.3	7.3	40.548	372	15.2948	15.2833	15.2308	15.2696	15.5465	15.538	15.5067	15.5304	1.19812	0.000919709
sll0520	sll0520	11	11	11	sll0520 NADH dehydrogenase subunit NdhI		1	11	11	11	50.8	50.8	50.8	22.15	193	18.0235	18.0984	18.0403	18.0541	18.1446	18.2034	18.2515	18.1998	1.10633	0.0223531
sll0521	sll0521	4	4	4	sll0521 NADH dehydrogenase subunit 6		1	4	4	4	14.6	14.6	14.6	21.522	198	15.5876	15.6624	15.7407	15.6635	15.8589	15.8087	15.8158	15.8278	1.12058	0.0524178
sll0522	sll0522	1	1	1	sll0522 NADH dehydrogenase subunit 4L		1	1	1	1	11.9	11.9	11.9	11.213	101	11.6365	11.525	11.5658	11.5757	12.3845	12.4239	12.4045	12.4043	1.77588	0.000531271
sll0524	sll0524	8	8	8	sll0524 hypothetical protein		1	8	8	8	19	19	19	47.478	447	17.5432	17.5242	17.5736	17.547	17.6117	17.5296	17.5763	17.5725	1.01786	0.420172
sll0528	sll0528	1	1	1	sll0528 hypothetical protein		1	1	1	1	2.6	2.6	2.6	40.465	379	10.815	11.0544	10.7576	10.8757	11.1427	10.9315	11.2271	11.1004	1.16857	0.150284
sll0529	sll0529	21	21	21	sll0529 hypothetical protein		1	21	21	21	40.9	40.9	40.9	78.316	731	18.6399	18.6426	18.7243	18.6689	18.816	18.8132	18.7986	18.8092	1.10214	0.0328571
sll0533	sll0533	20	20	20	sll0533 trigger factor		1	20	20	20	41.6	41.6	41.6	52.61	471	19.1767	19.2417	19.2108	19.2097	19.5789	19.5938	19.5947	19.5891	1.3008	0.00133717
sll0534	sll0534	9	8	8	sll0534 ATP-dependent Clp protease proteolytic subunit 2		1	9	8	8	41.2	38.1	38.1	24.823	226	18.1622	18.1377	18.2461	18.182	18.301	18.2024	18.206	18.2365	1.03848	0.302384
sll0535	sll0535	11	11	11	sll0535 ATP-dependent Clp protease ATPase subunit		1	11	11	11	25.6	25.6	25.6	49.298	445	16.6067	16.6611	16.68	16.6492	16.7007	16.7232	16.7753	16.7331	1.05985	0.0545322
sll0537	sll0537	1	1	1	sll0537 ammonium/methylammonium permease		1	1	1	1	1.5	1.5	1.5	58.129	541	12.5325	12.6014	12.6209	12.5849	12.4308	12.3719	12.3856	12.3961	0.877319	0.00646948
sll0540	sll0540	6	6	6	sll0540 phosphate-binding protein PstS homolog		1	6	6	6	30.3	30.3	30.3	32.534	307	15.4552	15.4009	15.4694	15.4418	15.3024	15.2849	15.2778	15.2884	0.899107	0.0110058
sll0541	sll0541	2	2	2	sll0541 acyl-lipid desaturase (delta 9)		1	2	2	2	7.2	7.2	7.2	37.203	318	15.8506	15.8255	15.7649	15.8137	15.9975	15.9938	15.9567	15.9827	1.1243	0.00981674
sll0542	sll0542	20	20	20	sll0542 acetyl-coenzyme A synthetase		1	20	20	20	33.7	33.7	33.7	73.051	653	17.9169	17.9108	18.0119	17.9465	18.0409	18.0082	18.0745	18.0412	1.06782	0.0820732
sll0544	sll0544	4	4	4	sll0544 hypothetical protein		1	4	4	4	13.2	13.2	13.2	37.266	333	14.8027	14.7649	14.8749	14.8142	14.6565	14.7074	14.7001	14.688	0.916274	0.041095
sll0545	sll0545	1	1	1	sll0545 hypothetical protein		1	1	1	1	3.3	3.3	3.3	27.206	240	12.8931	12.729	12.6673	12.7631	12.9806	12.925	12.9891	12.9649	1.15012	0.0853636
sll0547	sll0547	2	2	2	sll0547 unknown protein		1	2	2	2	8.6	8.6	8.6	24.811	220	13.8715	13.7717	13.6751	13.7728	13.9413	13.8535	13.8842	13.893	1.08691	0.155878
sll0549	sll0549	1	1	1	sll0549 hypothetical protein		1	1	1	1	6.4	6.4	6.4	28.207	249	13.1113	13.1267	13.2638	13.1673	13.1734	13.2244	13.1332	13.177	1.00678	0.870827
sll0550	sll0550	17	17	17	sll0550 flavoprotein		1	17	17	17	35.4	35.4	35.4	63.505	573	17.5967	17.5386	17.5858	17.5737	17.5208	17.5125	17.6055	17.5463	0.981178	0.481988
sll0553	sll0553	4	4	4	sll0553 hypothetical protein		1	4	4	4	16	16	16	33.806	306	16.8652	16.8241	16.7544	16.8146	16.7761	16.7997	16.7987	16.7915	0.984154	0.553639
sll0554	sll0554	6	6	6	sll0554 ferredoxin-thioredoxin reductase, catalytic chain		1	6	6	6	52.5	52.5	52.5	13.39	118	17.4649	17.5599	16.8711	17.2986	16.9155	17.244	17.1388	17.0994	0.871037	0.465658
sll0555	sll0555	4	4	4	sll0555 methionine aminopeptidase		1	4	4	4	17.5	17.5	17.5	30.344	280	11.7209	11.6382	11.8125	11.7239	12.1361	11.9874	11.9812	12.0349	1.24059	0.0121005
sll0556	sll0556	3	3	3	sll0556 Na+/H+ antiporter		1	3	3	3	5.5	5.5	5.5	67.36	631	14.2295	14.1906	14.2169	14.2123	14.3113	14.2144	14.1514	14.2257	1.00933	0.803485
sll0558	sll0558	7	7	7	sll0558 hypothetical protein YCF53		1	7	7	7	29.2	29.2	29.2	26.465	233	17.5315	17.5706	17.3505	17.4842	17.0813	17.407	17.3828	17.2904	0.874314	0.207052
sll0563	sll0563	5	5	5	sll0563 unknown protein		1	5	5	5	27.6	27.6	27.6	23.417	210	16.024	16.0893	16.1972	16.1035	15.9784	15.9912	16.0272	15.9989	0.930096	0.16655
sll0564	sll0564	3	3	3	sll0564 hypothetical protein		1	3	3	3	11.3	11.3	11.3	37.474	327	14.5356	14.5153	14.6707	14.5739	14.4346	14.5942	14.2055	14.4114	0.893498	0.286291
sll0565	sll0565	4	4	4	sll0565 hypothetical protein		1	4	4	4	28.6	28.6	28.6	15.219	133	13.5223	13.6063	13.644	13.5909	13.6025	13.6369	13.5615	13.6003	1.00656	0.835768
sll0567	sll0567	2	2	2	sll0567 ferric uptake regulation protein		1	2	2	2	10.3	10.3	10.3	19.072	165	15.9323	15.9971	15.9271	15.9522	15.9393	15.8187	15.8514	15.8698	0.944471	0.137793
sll0569	sll0569	9	9	9	sll0569 RecA gene product		1	9	9	9	28	28	28	37.805	354	17.0419	17.0113	17.0418	17.0317	16.9949	17.092	17.1251	17.0707	1.02739	0.425318
sll0572	sll0572	6	6	6	sll0572 hypothetical protein		1	6	6	6	13.2	13.2	13.2	52.016	470	16.0243	15.9841	15.9009	15.9698	15.7718	15.8376	15.8598	15.8231	0.903314	0.035343
sll0573	sll0573	1	1	1	sll0573 carbamate kinase		1	1	1	1	2.6	2.6	2.6	32.935	308				#DIV/0!				#DIV/0!	#DIV/0!	#DIV/0!
sll0575	sll0575	8	8	8	sll0575 probable lipopolysaccharide ABC transporter ATP binding subunit		1	8	8	8	29.5	29.5	29.5	28.181	254	16.5838	16.5531	16.5789	16.5719	16.7624	16.7917	16.8153	16.7898	1.16302	0.000707469
sll0576	sll0576	14	14	14	sll0576 putative sugar-nucleotide epimerase/dehydratease		1	14	14	14	48.1	48.1	48.1	34.951	312	18.205	18.2198	18.1839	18.2029	18.1895	18.1629	18.1791	18.1772	0.98232	0.123748
sll0577	sll0577	2	2	2	sll0577 hypothetical protein		1	2	2	2	13.6	13.6	13.6	17.839	169	16.2913	16.2994	16.2561	16.2823	16.2595	16.2929	16.217	16.2565	0.982288	0.382932
sll0578	sll0578	6	6	6	sll0578 phosphoribosylaminoimidazole carboxylase ATPase subunit		1	6	6	6	22.4	22.4	22.4	42.641	388	15.6959	15.5996	15.6234	15.6397	15.491	15.5423	15.5227	15.5187	0.919583	0.0341227
sll0584	sll0584	1	1	1	sll0584 hypothetical protein YCF36		1	1	1	1	4.6	4.6	4.6	19.933	173	13.663	13.995	14.0234	13.8938	13.8665	13.8926	14.2373	13.9988	1.07553	0.561973
sll0585	sll0585	6	6	6	sll0585 hypothetical protein		1	6	6	6	22.1	22.1	22.1	34.724	317	15.6289	15.676	15.6348	15.6466	15.8041	15.7503	15.6709	15.7418	1.06822	0.119701
sll0586	sll0586	3	3	3	sll0586 hypothetical protein		1	3	3	3	6.9	6.9	6.9	44.522	408	15.5229	15.532	15.5088	15.5213	15.399	15.4547	15.4464	15.4334	0.94089	0.0248483
sll0587	sll0587	10	10	10	sll0587 pyruvate kinase		1	10	10	10	27.7	27.7	27.7	51.993	473	17.3606	17.3378	17.2781	17.3255	17.1085	17.1246	17.1302	17.1211	0.867882	0.0102337
sll0588	sll0588	2	2	2	sll0588 unknown protein		1	2	2	2	20.3	20.3	20.3	16.516	153	16.0003	16.0921	16.1121	16.0681	15.9615	16.0347	16.0292	16.0085	0.959486	0.234575
sll0593	sll0593	6	6	6	sll0593 glucokinase		1	6	6	6	19.2	19.2	19.2	37.712	355	15.7854	15.8292	15.7997	15.8047	15.8337	15.7576	15.7471	15.7795	0.982656	0.467379
sll0594	sll0594	2	2	2	sll0594 transcriptional regulator		1	2	2	2	10.2	10.2	10.2	22.656	205	13.7629	13.8069	14.0629	13.8776	13.5733	13.7531	13.6759	13.6674	0.864451	0.140577
sll0595	sll0595	2	2	2	sll0595 unknown protein		1	2	2	2	13.3	13.3	13.3	15.78	143	14.9455	14.8955	14.901	14.914	14.5416	14.6306	14.6367	14.603	0.80606	0.00292305
sll0596	sll0596	5	5	5	sll0596 hypothetical protein		1	5	5	5	21.3	21.3	21.3	26.325	244	16.0655	15.9402	15.9301	15.9786	16.0553	15.9194	15.9728	15.9825	1.00272	0.950166
sll0597	sll0597	2	2	2	sll0597 hypothetical protein		1	2	2	2	5.3	5.3	5.3	40.803	375	14.3824	14.6254	14.7872	14.5983	14.8672	15.0056	15.0608	14.9779	1.30093	0.0650645
sll0601	sll0601	7	7	7	sll0601 nitrilase homolog		1	7	7	7	42.3	42.3	42.3	30.191	272	16.2952	16.4686	16.0735	16.2791	16.0592	16.4054	16.3276	16.264	0.989615	0.927378
sll0602	sll0602	12	12	12	sll0602 hypothetical protein		1	12	12	12	23.9	23.9	23.9	77.763	691	16.0573	16.0727	16.0396	16.0565	16.1432	16.1311	16.133	16.1358	1.05648	0.00730312
sll0603	sll0603	4	4	4	sll0603 menaquinone biosynthesis protein MenD		1	4	4	4	7.4	7.4	7.4	66.133	595	13.7467	13.8139	13.7887	13.7831	13.7928	13.9503	13.8847	13.8759	1.06646	0.168293
sll0606	sll0606	12	12	12	sll0606 hypothetical protein		1	12	12	12	29	29	29	50.68	476	16.7953	16.8286	16.7912	16.805	16.8207	16.7996	16.8042	16.8082	1.00218	0.829957
sll0611	sll0611	1	1	1	sll0611 hypothetical protein		1	1	1	1	6.8	6.8	6.8	16.853	148	14.6513	14.7287	14.6643	14.6814	14.5234	14.6726	14.6528	14.6163	0.955873	0.303965
sll0613	sll0613	3	3	3	sll0613 Holliday junction DNA helicase RuvB		1	3	3	3	10.8	10.8	10.8	40.053	361	14.7073	14.764	14.8691	14.7801	14.7198	14.7683	14.7456	14.7446	0.975658	0.536778
sll0614	sll0614	1	1	1	sll0614 unknown protein		1	1	1	1	6.8	6.8	6.8	14.916	132	13.6867	13.7404	13.7043	13.7105	13.6787	13.6574	13.7232	13.6864	0.983465	0.392796
sll0616	sll0616	47	47	47	sll0616 preprotein translocase SecA subunit		1	47	47	47	49	49	49	107.01	932	19.5325	19.5196	19.5078	19.52	19.538	19.4967	19.5286	19.5211	1.00077	0.942843
sll0617	sll0617	9	9	9	sll0617 plasma membrane protein essential for thylakoid formation		1	9	9	9	40.8	40.8	40.8	28.905	267	18.8248	18.8396	18.8846	18.8497	18.9772	18.9827	19.1435	19.0345	1.13667	0.0650984
sll0622	sll0622	13	13	13	sll0622 quinolinate synthetase		1	13	13	13	54.1	54.1	54.1	35.421	318	16.5209	16.5416	16.6792	16.5806	16.6471	16.6677	16.7155	16.6768	1.06894	0.182928
sll0623	sll0623	4	4	4	sll0623 unknown protein		1	4	4	4	25.8	25.8	25.8	24.343	229	14.8219	14.77	14.9835	14.8585	14.9503	14.9504	15.0247	14.9752	1.08423	0.203625
sll0625	sll0625	6	6	6	sll0625 unknown protein		1	6	6	6	22.7	22.7	22.7	25.632	225	15.5337	15.3679	15.5127	15.4714	15.5217	15.5469	15.5857	15.5514	1.05704	0.260873
sll0626	sll0626	8	8	8	sll0626 putative neutral invertase		1	8	8	8	18	18	18	56.707	489	15.872	15.8078	15.8003	15.8267	15.8173	15.7701	15.8515	15.8129	0.990507	0.696058
sll0629	sll0629	1	1	1	sll0629 alternative photosystem I reaction center subunit X		1	1	1	1	7.8	7.8	7.8	13.718	128	15.6803	15.7424	16.0815	15.8347	16.0935	16.1237	16.5048	16.2407	1.32496	0.0895689
sll0630	sll0630	11	11	11	sll0630 unknown protein		1	11	11	11	73.1	73.1	73.1	16.468	145	17.3049	17.3483	17.3061	17.3198	17.2338	17.2838	17.3609	17.2928	0.98149	0.552291
sll0631	sll0631	14	14	14	sll0631 L-aspartate oxidase		1	14	14	14	29.1	29.1	29.1	60.498	553	16.5893	16.6276	16.6388	16.6185	16.4356	16.5621	16.5239	16.5072	0.925733	0.081507
sll0634	sll0634	6	6	6	sll0634 photosystem I biogenesis protein BtpA		1	6	6	6	31.7	31.7	31.7	30.042	287	16.145	16.1721	16.2327	16.1833	16.1537	16.1179	16.1359	16.1358	0.96765	0.200733
sll0635	sll0635	15	15	15	sll0635 probable thiamine-phosphate pyrophosphorylase		1	15	15	15	47.8	47.8	47.8	37.883	343	17.2725	17.2754	17.1953	17.2477	17.2581	17.2457	17.2735	17.2591	1.00793	0.712676
sll0638	sll0638	4	4	4	sll0638 periplasmic protein, function unknown		1	4	4	4	10.5	10.5	10.5	49.429	449	14.6931	14.9003	14.8386	14.8107	14.8772	14.5814	14.7158	14.7248	0.942204	0.464802
sll0639	sll0639	3	3	3	sll0639 hypothetical protein		1	3	3	3	5.8	5.8	5.8	45.927	417	14.3816	14.4289	14.4529	14.4211	14.128	14.127	13.9759	14.077	0.787756	0.0114136
sll0640	sll0640	7	7	7	sll0640 probable sodium/sulfate symporter		1	7	7	7	12.1	12.1	12.1	66.7	612	16.5186	16.5055	16.6424	16.5555	16.5475	16.5577	16.5237	16.543	0.991357	0.803703
sll0641	sll0641	1	1	1	sll0641 unknown protein		1	1	1	1	2	2	2	58.509	509	11.1771	11.3747	11.1669	11.2395	11.0278	11.3232	11.1325	11.1612	0.947143	0.516969
sll0643	sll0643	6	6	6	sll0643 urease accessory protein G		1	6	6	6	37.4	37.4	37.4	22.012	206	15.6158	15.6053	15.5707	15.5973	15.6445	15.7011	15.6887	15.6781	1.05762	0.0230474
sll0644	sll0644	4	4	4	sll0644 probable esterase		1	4	4	4	13.3	13.3	13.3	36.408	331	15.0491	15.1106	15.1822	15.114	15.0869	15.1393	15.0808	15.1023	0.991965	0.803679
sll0645	sll0645	7	7	7	sll0645 unknown protein		1	7	7	7	33.3	33.3	33.3	27.096	255	17.0485	17.0489	17.0461	17.0479	17.047	16.9506	16.9028	16.9668	0.945348	0.195971
sll0646	sll0646	3	3	3	sll0646 guanylyl cyclase		1	3	3	3	5.7	5.7	5.7	82.313	756	14.2938	14.1564	13.963	14.1377	14.2729	14.3091	14.237	14.273	1.09831	0.292245
sll0647	sll0647	1	1	1	sll0647 unknown protein		1	1	1	1	3.9	3.9	3.9	28.73	256	12.4067	12.529	12.514	12.4832	12.3701	12.2088	12.2337	12.2709	0.863141	0.0312395
sll0648	sll0648	1	1	1	sll0648 probable glycosyltransferase		1	1	1	1	2.8	2.8	2.8	38.523	358	13.5625	13.5218	13.4817	13.522	13.6872	13.5987	13.6061	13.6307	1.07824	0.0433995
sll0649	sll0649	9	9	9	sll0649 two-component response regulator OmpR subfamily		1	9	9	9	36.3	36.3	36.3	28.428	245	16.6693	16.6628	16.6552	16.6624	16.5508	16.5668	16.5253	16.5477	0.923535	0.00619488
sll0654	sll0654	33	33	33	sll0654 alkaline phosphatase		1	33	33	33	35.3	35.3	35.3	149.39	1409	20.1951	20.163	20.1616	20.1732	19.4725	19.5615	19.546	19.5267	0.638796	0.000484645
sll0656	sll0656	17	17	17	sll0656 unknown protein		1	17	17	17	13.9	13.9	13.9	196.53	1879	18.643	18.7134	18.5136	18.6233	18.1109	18.1886	18.179	18.1595	0.72507	0.00766342
sll0657	sll0657	3	3	3	sll0657 phospho-N-acetylmuramoyl-pentapeptide-transferase		1	3	3	3	8.2	8.2	8.2	38.575	365	13.3567	13.3057	13.3025	13.3216	13.386	13.3888	13.4067	13.3939	1.05134	0.0414644
sll0659	sll0659	8	8	7	sll0659 hypothetical protein		1	8	8	7	15.3	15.3	15.1	58.441	522	16.4701	16.4244	16.3652	16.4199	16.4261	16.4461	16.4835	16.4519	1.02241	0.422595
sll0660	sll0660	5	5	5	sll0660 pyridoxal phosphate biosynthetic protein PdxA		1	5	5	5	14.9	14.9	14.9	37.224	349	15.7266	15.638	15.6004	15.655	15.5793	15.7039	15.7123	15.6652	1.00709	0.866921
sll0661	sll0661	4	4	4	sll0661 hypothetical protein YCF35		1	4	4	4	35.2	35.2	35.2	14.443	128	15.5217	15.5333	15.6149	15.5566	15.8641	15.6093	15.7993	15.7576	1.14944	0.105384
sll0662	sll0662	3	3	3	sll0662 4Fe-4S type iron-sulfur protein		1	3	3	3	31.6	31.6	31.6	15.129	133	12.2983	12.102	12.2847	12.2284	12.3742	12.3729	12.2837	12.3436	1.08314	0.203036
sll0672	sll0672	22	22	21	sll0672 cation-transporting p-type ATPase PacL		1	22	22	21	29.4	29.4	28.6	102.48	945	18.2448	18.2754	18.1893	18.2365	18.1498	18.2112	18.161	18.174	0.957596	0.123588
sll0676	sll0676	2	2	2	sll0676 hypothetical protein		1	2	2	2	12.2	12.2	12.2	20.745	180	13.1781	13.1499	13.4489	13.2589	13.2189	13.1912	13.2335	13.2145	0.969694	0.688273
sll0679	sll0679	13	13	13	sll0679 periplasmic phosphate-binding protein of ABC transporter		1	13	13	13	32.4	32.4	32.4	36.778	336	18.7044	18.6275	18.6184	18.6501	17.8426	17.8085	17.7778	17.8096	0.558463	3.88681e-05
sll0680	sll0680	12	12	12	sll0680 phosphate-binding periplasmic protein precursor (PBP)		1	12	12	12	52	52	52	40.023	383	20.0003	19.9954	19.8328	19.9428	18.5811	18.6889	18.5809	18.617	0.398914	0.000106931
sll0681	sll0681	3	3	3	sll0681 phosphate transport system permease protein PstC homolog		1	3	3	3	11	11	11	33.848	317	16.0095	16.0257	15.6857	15.907	14.9189	14.9719	14.9086	14.9331	0.509139	0.0108182
sll0682	sll0682	1	1	1	sll0682 phosphate transport system permease protein PstA homolog		1	1	1	1	2.4	2.4	2.4	30.171	287	15.3322	15.1605	15.2925	15.2617	13.1134	13.2014	12.9054	13.0734	0.219404	0.000130626
sll0683	sll0683	11	11	10	sll0683 phosphate transport ATP-binding protein PstB homolog		1	11	11	10	49.8	49.8	46.8	30.21	269	18.0366	17.9002	17.8229	17.9199	16.1107	16.1725	16.1096	16.1309	0.289375	0.000437045
sll0684	sll0684	10	9	9	sll0684 phosphate transport ATP-binding protein PstB homolog		1	10	9	9	47	44	44	29.244	266	17.8344	17.7677	17.6009	17.7343	16.2958	16.3795	16.3351	16.3368	0.379579	0.000951086
sll0685	sll0685	6	6	6	sll0685 hypothetical protein		1	6	6	6	43.2	43.2	43.2	17.187	162	16.3411	16.3048	16.2122	16.286	15.5643	15.6304	15.665	15.6199	0.630198	0.000238557
sll0689	sll0689	7	7	7	sll0689 Na+/H+ antiporter		1	7	7	7	10.6	10.6	10.6	47.871	461	17.0391	17.0409	17.0777	17.0526	17.387	17.3221	17.3375	17.3489	1.228	0.000538255
sll0698	sll0698	13	13	13	sll0698 drug sensory protein A, low temperature sensor, two-component sensor histidine kinase		1	13	13	13	21.7	21.7	21.7	74.535	663	16.2398	16.2305	16.2234	16.2313	16.2678	16.2526	16.2227	16.2477	1.01146	0.34106
sll0702	sll0702	1	1	1	sll0702 unknown protein		1	1	1	1	11.5	11.5	11.5	13.705	130	13.3505	13.2198	13.3477	13.306	13.0486	13.0387	13.1663	13.0845	0.857677	0.0204927
sll0703	sll0703	2	2	2	sll0703 unknown protein		1	2	2	2	5.3	5.3	5.3	44.755	399	11.4193	11.4381	11.359	11.4055	11.5723	11.6356	11.6023	11.6034	1.14707	0.00345529
sll0704	sll0704	1	1	1	sll0704 cysteine desulfurase		1	1	1	1	2.3	2.3	2.3	42.48	391	12.6779	12.6807	12.604	12.6542	12.8664	12.82	12.8855	12.8573	1.15117	0.00376098
sll0708	sll0708	5	5	5	sll0708 dimethyladenosine transferase		1	5	5	5	18.7	18.7	18.7	31.648	284	13.8896	13.9531	13.9193	13.9207	13.8261	14.0072	13.8397	13.891	0.979632	0.667732
sll0709	sll0709	9	9	9	sll0709 putative endonuclease		1	9	9	9	20.1	20.1	20.1	54.094	462	16.5113	16.5208	16.5087	16.5136	16.4851	16.4851	16.5189	16.4964	0.98813	0.261971
sll0710	sll0710	5	5	5	sll0710 unknown protein		1	5	5	5	6.5	6.5	6.5	86.462	726	14.1028	14.3277	14.0728	14.1678	14.2258	14.1956	14.1986	14.2066	1.02731	0.677548
sll0711	sll0711	3	3	3	sll0711 isopentenyl monophosphate kinase		1	3	3	3	13.7	13.7	13.7	34.08	315	15.055	15.0591	15.1579	15.0907	15.3274	15.08	15.1292	15.1788	1.06302	0.370886
sll0712	sll0712	12	12	12	sll0712 cysteine synthase		1	12	12	12	56.3	56.3	56.3	34.734	325	17.4824	17.4703	17.4226	17.4584	17.47	17.4338	17.4014	17.4351	0.98394	0.435261
sll0716	sll0716	4	4	4	sll0716 leader peptidase I (signal peptidase I)		1	4	4	4	35.2	35.2	35.2	22.229	196	12.6706	12.6314	12.5748	12.6256	12.3153	12.5012	12.4946	12.437	0.87748	0.0724494
sll0720	sll0720	1	1	1	sll0720 RTX toxin activating protein homolog		1	1	1	1	4.8	4.8	4.8	16.959	147	13.3603	13.0194	13.5706	13.3167	11.7901	11.6555	11.6539	11.6998	0.326032	0.00636029
sll0721	sll0721	4	4	4	sll0721 unknown protein		1	4	4	4	2.9	2.9	2.9	139.55	1290	15.479	15.5039	15.4766	15.4865	15.1391	15.2112	15.1856	15.1786	0.807853	0.00158411
sll0723	sll0723	22	22	22	sll0723 unknown protein		1	22	22	22	14.2	14.2	14.2	192.16	1771	18.1424	18.1169	18.1345	18.1312	17.7189	17.7275	17.7378	17.7281	0.756191	4.32393e-06
sll0726	sll0726	28	28	28	sll0726 phosphoglucomutase		1	28	28	28	62.6	62.6	62.6	61.124	567	19.1358	19.1212	19.2045	19.1538	19.2544	19.2583	19.2435	19.2521	1.07047	0.0581396
sll0727	sll0727	3	3	3	sll0727 hypothetical protein		1	3	3	3	6.4	6.4	6.4	65.59	580	14.1427	14.1835	14.1515	14.1592	14.0171	14.0286	14.0743	14.04	0.920656	0.00689971
sll0728	sll0728	10	10	10	sll0728 acetyl-CoA carboxylase alpha subunit		1	10	10	10	36.5	36.5	36.5	36.042	326	17.6179	17.6205	17.6688	17.6357	17.5768	17.5793	17.7477	17.6346	0.99921	0.986087
sll0729	sll0729	5	5	5	sll0729 probable DNA methyltransferase		1	5	5	5	15.4	15.4	15.4	32.862	285	16.815	16.8079	16.8503	16.8244	16.9333	16.8857	16.8597	16.8929	1.04861	0.0655052
sll0733	sll0733	2	2	2	sll0733 unknown protein		1	2	2	2	9.4	9.4	9.4	16.543	149	13.0361	13.1905	13.2445	13.1571	12.8483	12.9529	12.8868	12.896	0.834456	0.0348473
sll0735	sll0735	19	19	19	sll0735 hypothetical protein		1	19	19	19	37.4	37.4	37.4	62.075	529	18.8045	18.8741	18.4792	18.7193	18.5859	18.8029	18.7685	18.7191	0.999866	0.998976
sll0737	sll0737	6	6	6	sll0737 hypothetical protein		1	6	6	6	8.7	8.7	8.7	96.682	861	15.2604	15.2045	15.1765	15.2138	15.2383	15.1973	15.2342	15.2233	1.00659	0.756035
sll0738	sll0738	3	3	3	sll0738 molybdate-binding periplasmic protein		1	3	3	3	10	10	10	29.156	270	14.1097	14.2605	14.143	14.171	13.9924	14.1683	13.9145	14.0251	0.903758	0.186814
sll0740	sll0740	7	7	7	sll0740 hypothetical protein		1	7	7	7	31.9	31.9	31.9	26.987	235	15.3978	15.4173	15.4295	15.4148	15.2574	15.2711	15.3137	15.2807	0.911231	0.00553723
sll0741	sll0741	20	20	20	sll0741 pyruvate flavodoxin oxidoreductase		1	20	20	20	18.4	18.4	18.4	131.46	1199	17.8677	17.8575	17.9144	17.8799	17.7361	17.6895	17.7336	17.7197	0.894928	0.00247557
sll0742	sll0742	4	4	4	sll0742 hypothetical protein		1	4	4	4	24.8	24.8	24.8	17.907	149	14.7837	14.7309	14.8449	14.7865	14.6686	14.6568	14.6515	14.659	0.915408	0.0576795
sll0743	sll0743	1	1	1	sll0743 hypothetical protein		1	1	1	1	4.4	4.4	4.4	19.214	160	10.8598	10.8596	10.9222	10.8805	11.2862	11.1546	11.1067	11.1825	1.23287	0.0192896
sll0744	sll0744	3	3	3	sll0744 hypothetical protein		1	3	3	3	12.2	12.2	12.2	38.44	343	12.2944	12.2378	12.0975	12.2099	12.0048	11.8829	11.9453	11.9443	0.831862	0.0256533
sll0745	sll0745	3	3	3	sll0745 phosphofructokinase		1	3	3	3	9.9	9.9	9.9	41.759	384	14.1692	14.0308	14.228	14.1427	13.8724	13.8321	13.8792	13.8612	0.822766	0.0340219
sll0749	sll0749	3	3	3	sll0749 hypothetical protein		1	3	3	3	12.6	12.6	12.6	21.201	199	15.5324	15.4606	15.5617	15.5182	15.5919	15.5879	15.6134	15.5977	1.05666	0.109658
sll0750	sll0750	10	10	10	sll0750 two-component sensor histidine kinase, KaiC-interacting protein, involved in circadian rhythm		1	10	10	10	30	30	30	43.435	383	15.8738	15.853	15.9215	15.8828	15.9075	15.8289	15.9062	15.8809	0.998685	0.957002
sll0751	sll0751	1	1	1	sll0751 hypothetical protein YCF22		1	1	1	1	4.7	4.7	4.7	18.358	169	10.4293	10.91	11.1774	10.8389	11.0186	11.0854	11.0697	11.0579	1.16393	0.422532
sll0752	sll0752	8	8	8	sll0752 hypothetical protein		1	8	8	8	36.9	36.9	36.9	31.417	287	16.2442	16.1928	16.3368	16.2579	16.408	16.4163	16.4225	16.4156	1.11549	0.0632305
sll0753	sll0753	12	12	12	sll0753 FolD bifunctional protein		1	12	12	12	47.6	47.6	47.6	30.943	294	17.7306	17.7074	17.8032	17.7471	17.822	17.7632	17.8228	17.8027	1.03929	0.196134
sll0754	sll0754	7	7	7	sll0754 ribosome binding factor A		1	7	7	7	44.4	44.4	44.4	14.749	133	17.0572	16.9828	16.9601	17	16.681	16.7442	16.7427	16.7226	0.825081	0.00228797
sll0755	sll0755	10	10	10	sll0755 thioredoxin peroxidase		1	10	10	10	61.5	61.5	61.5	22.509	200	17.2583	17.2766	17.2459	17.2603	17.2383	17.2072	17.1573	17.2009	0.959705	0.114784
sll0756	sll0756	2	2	2	sll0756 unknown protein		1	2	2	2	15.8	15.8	15.8	21.814	202	15.4117	15.5004	15.4554	15.4559	15.4148	15.4104	15.3257	15.3836	0.951179	0.136652
sll0757	sll0757	10	10	10	sll0757 amidophosphoribosyltransferase		1	10	10	10	27.9	27.9	27.9	53.67	495	15.5553	15.6891	15.7258	15.6568	15.8396	15.8926	15.9427	15.8916	1.1768	0.0262156
sll0759	sll0759	9	9	9	sll0759 ABC transporter ATP-binding protein		1	9	9	9	36	36	36	37.629	347	15.9506	16.0253	15.9649	15.9803	15.9566	15.9883	15.9306	15.9585	0.984988	0.487795
sll0760	sll0760	2	2	2	sll0760 hypothetical protein YCF38		1	2	2	2	5.1	5.1	5.1	31.677	294	15.5878	15.5769	15.6311	15.5986	15.5679	15.6032	15.6958	15.6223	1.01658	0.611841
sll0761	sll0761	1	1	1	sll0761 unknown protein		1	1	1	1	16.8	16.8	16.8	12.779	119	12.0629	12.1623	12.114	12.1131	11.8522	11.8721	11.8274	11.8506	0.833636	0.00476686
sll0762	sll0762	1	1	1	sll0762 unknown protein		1	1	1	1	13.8	13.8	13.8	12.766	116	9.94981	10.1071	9.65047	9.90247	9.99038	9.87556	9.96272	9.94289	1.02841	0.794796
sll0763	sll0763	1	1	1	sll0763 hypothetical protein		1	1	1	1	5.9	5.9	5.9	12.852	119	12.7522	12.8212	12.6994	12.7576	13.1345	13.2142	13.2578	13.2022	1.36087	0.000919031
sll0764	sll0764	10	10	10	sll0764 urea transport system ATP-binding protein		1	10	10	10	34	34	34	41.194	373	16.7293	16.6982	16.8515	16.7597	16.7907	16.7521	16.7703	16.771	1.00791	0.833206
sll0766	sll0766	3	3	3	sll0766 DNA repair protein RadC		1	3	3	3	17.7	17.7	17.7	26.973	243	12.6785	12.6599	12.8786	12.739	12.7438	12.5941	12.7539	12.6973	0.971478	0.658485
sll0767	sll0767	5	5	5	sll0767 50S ribosomal protein L20		1	5	5	5	35.9	35.9	35.9	13.553	117	16.0132	15.999	16.068	16.0267	16.643	16.548	16.5226	16.5712	1.45848	0.000737967
sll0771	sll0771	4	4	4	sll0771 glucose transport protein		1	4	4	4	8.8	8.8	8.8	49.747	468	15.6036	15.5713	15.5056	15.5602	15.5681	15.5942	15.5031	15.5551	0.996525	0.905083
sll0772	sll0772	3	3	1	sll0772 probable porin; major outer membrane protein		1	3	3	1	4.6	4.6	1.8	59.145	546	14.382	14.3069	14.3079	14.3323	14.4793	14.4498	14.4732	14.4674	1.09822	0.0219366
sll0776	sll0776	11	11	11	sll0776 serine/threonine kinase		1	11	11	11	20	20	20	55.213	505	16.2234	16.2447	16.3453	16.2711	16.4512	16.4351	16.503	16.4631	1.14233	0.0193826
sll0777	sll0777	4	4	4	sll0777 putative carboxypeptidase		1	4	4	4	13.4	13.4	13.4	34.012	305	15.0121	14.9833	14.8659	14.9538	15.4603	15.3851	15.4209	15.4221	1.38354	0.002933
sll0779	sll0779	4	4	4	sll0779 unknown protein		1	4	4	4	3.6	3.6	3.6	100.44	884	14.1903	14.3307	14.2645	14.2618	14.26	14.2963	14.3028	14.2864	1.01713	0.614646
sll0781	sll0781	11	11	11	sll0781 hypothetical protein		1	11	11	11	66.5	66.5	66.5	18.634	155	16.8969	16.9027	16.8867	16.8954	16.8735	16.8547	16.7966	16.8416	0.96338	0.140612
sll0783	sll0783	3	3	3	sll0783 unknown protein		1	3	3	3	21.2	21.2	21.2	17.64	160	16.8564	16.8486	16.9386	16.8812	16.1564	16.2841	16.2448	16.2284	0.636073	0.000245058
sll0794	sll0794	1	1	1	sll0794 cobalt-dependent transcriptional regulator		1	1	1	1	3.5	3.5	3.5	40.61	370	13.2045	13.0106	12.9416	13.0522	13.0739	13.195	13.0876	13.1189	1.04727	0.503474
sll0804	sll0804	3	3	3	sll0804 hypothetical protein		1	3	3	3	6.6	6.6	6.6	49.154	453	13.5255	13.6348	13.6035	13.5879	13.7182	13.5796	13.5817	13.6265	1.0271	0.534169
sll0807	sll0807	5	5	5	sll0807 pentose-5-phosphate-3-epimerase		1	5	5	5	27	27	27	24.971	230	15.6289	15.6804	15.6577	15.6556	15.8031	15.8016	15.7968	15.8005	1.10561	0.00954708
sll0813	sll0813	7	7	7	sll0813 cytochrome c oxidase subunit II		1	7	7	7	24.3	24.3	24.3	33.47	300	16.3254	16.2874	16.4507	16.3545	16.2931	16.2575	16.2528	16.2678	0.941684	0.216245
sll0814	sll0814	2	2	2	sll0814 hypothetical protein		1	2	2	2	4.6	4.6	4.6	33.119	303	14.6828	14.5758	14.6376	14.632	14.9203	14.8634	14.8151	14.8662	1.17625	0.0057296
sll0815	sll0815	7	7	7	sll0815 unknown protein		1	7	7	7	27.7	27.7	27.7	30.368	264	15.2123	15.2264	15.2212	15.22	15.4325	15.2864	15.3067	15.3419	1.08816	0.115353
sll0816	sll0816	7	7	7	sll0816 probable oxidoreductase		1	7	7	7	20.8	20.8	20.8	41.489	371	15.3945	15.3893	15.4226	15.4021	15.3008	15.3103	15.3163	15.3091	0.937567	0.00524565
sll0817	sll0817	1	1	1	sll0817 tRNA delta-2-isopentenylpyrophosphate (IPP) transferase		1	1	1	1	3.3	3.3	3.3	33.561	303	15.5651	15.513	15.6045	15.5609	15.5115	15.5388	15.5594	15.5366	0.983302	0.475949
sll0818	sll0818	2	2	2	sll0818 tetrapyrrole methylase family protein		1	2	2	2	8.6	8.6	8.6	30.83	279	12.6719	12.7704	12.6692	12.7038	12.7325	12.8918	12.8384	12.8209	1.08453	0.118628
sll0819	sll0819	9	9	9	sll0819 photosystem I reaction center subunit III precursor (PSI-F), plastocyanin (cyt c553) docking protein		1	9	9	9	47.3	47.3	47.3	18.249	165	20.006	20.0066	20.0974	20.0367	20.04	20.064	20.0911	20.065	1.01986	0.46455
sll0821	sll0821	15	15	15	sll0821 phytochrome-like protein		1	15	15	15	12.1	12.1	12.1	144.69	1276	16.5064	16.4694	16.7038	16.5598	16.4027	16.411	16.5071	16.4402	0.920441	0.2381
sll0822	sll0822	10	10	10	sll0822 hypothetical protein		1	10	10	10	76.7	76.7	76.7	13.962	129	19.1914	19.106	19.2679	19.1885	19.1092	19.0424	19.0754	19.0756	0.92478	0.12321
sll0823	sll0823	6	6	6	sll0823 probable succinate dehydrogenase iron-sulfur protein		1	6	6	6	26.9	26.9	26.9	27.289	245	16.1162	16.1581	16.3062	16.1935	16.2851	16.388	16.2868	16.32	1.09162	0.148225
sll0825	sll0825	1	1	1	sll0825 polyA polymerase		1	1	1	1	3.1	3.1	3.1	46.387	416	11.2694	11.3955	11.4496	11.3715	11.0281	11.439	11.2063	11.2245	0.903104	0.347563
sll0827	sll0827	9	9	9	sll0827 hypothetical protein		1	9	9	9	18.5	18.5	18.5	58.152	496	15.5216	15.5738	15.5231	15.5395	15.6002	15.587	15.5576	15.5816	1.02959	0.125621
sll0828	sll0828	7	7	7	sll0828 putative amidase		1	7	7	7	20	20	20	54.254	506	17.4056	17.3163	17.1618	17.2946	17.3925	17.3457	17.3513	17.3632	1.04868	0.438495
sll0829	sll0829	2	2	2	sll0829 probable methyltransferase		1	2	2	2	12.7	12.7	12.7	23.071	212	15.5548	15.548	15.6367	15.5798	15.6306	15.5989	15.6442	15.6246	1.0315	0.255025
sll0830	sll0830	15	15	15	sll0830 elongation factor EF-G		1	15	15	15	25.4	25.4	25.4	73.369	669	17.6919	17.6628	17.7287	17.6944	17.667	17.6392	17.659	17.6551	0.973086	0.163724
sll0833	sll0833	5	5	5	sll0833 probable oligopeptides ABC transporter permease protein		1	5	5	5	17.8	17.8	17.8	40.28	371	15.0282	15.0089	15.086	15.041	15.0841	15.0672	15.1247	15.092	1.03592	0.157707
sll0834	sll0834	5	5	5	sll0834 low affinity sulfate transporter		1	5	5	5	11.5	11.5	11.5	59.048	564	13.982	14.0749	14.0633	14.0401	14.3874	14.3289	14.3611	14.3591	1.24753	0.00190778
sll0837	sll0837	14	14	14	sll0837 periplasmic protein, function unknown		1	14	14	14	43.5	43.5	43.5	32.906	294	16.5765	16.6254	16.6844	16.6288	16.6715	16.7272	16.7259	16.7082	1.05658	0.109086
sll0838	sll0838	7	7	7	sll0838 orotidine 5 monophosphate decarboxylase		1	7	7	7	39.4	39.4	39.4	24.705	231	16.1472	16.1404	16.2994	16.1957	16.3654	16.2416	16.3113	16.3061	1.07956	0.163741
sll0839	sll0839	2	2	2	sll0839 hypothetical protein		1	2	2	2	6.6	6.6	6.6	21.577	197	11.2838	11.2295	11.1124	11.2086	11.3073	11.3239	11.2557	11.2956	1.0622	0.221013
sll0842	sll0842	9	9	9	sll0842 neopullulanase		1	9	9	9	21.9	21.9	21.9	58.056	508	15.9592	15.953	15.9777	15.9633	15.9093	15.8532	15.9194	15.894	0.953085	0.064314
sll0844	sll0844	5	5	5	sll0844 tRNA (5-methylaminomethyl-2-thiouridylate)-methyltransferase		1	5	5	5	15.1	15.1	15.1	39.096	358	14.0329	13.9813	13.7421	13.9188	13.8956	13.8819	13.9094	13.8956	0.984108	0.820872
sll0846	sll0846	1	1	1	sll0846 hypothetical protein		1	1	1	1	6.9	6.9	6.9	11.634	102	12.1558	12.3265	12.3003	12.2609	12.1967	12.6968	12.3566	12.4167	1.11406	0.406044
sll0848	sll0848	7	7	7	sll0848 chromosomal replication initiator protein DnaA		1	7	7	7	15	15	15	50.05	447	13.4544	13.6034	13.5315	13.5298	13.6006	13.6403	13.5567	13.5992	1.04933	0.249951
sll0851	sll0851	18	18	18	sll0851 photosystem II CP43 protein		1	18	18	18	40.2	40.2	40.2	50.302	460	19.66	19.675	19.7632	19.6994	19.6853	19.7072	19.8358	19.7428	1.0305	0.494013
sll0853	sll0853	4	4	4	sll0853 hypothetical protein		1	4	4	4	26.9	26.9	26.9	21.213	186	15.4155	15.3819	15.3531	15.3835	15.3732	15.3345	15.3761	15.3613	0.984701	0.382298
sll0854	sll0854	3	3	3	sll0854 hypothetical protein		1	3	3	3	14.3	14.3	14.3	34.527	308	14.5107	14.4716	14.5165	14.4996	14.5853	14.4841	14.5014	14.5236	1.01674	0.538938
sll0855	sll0855	3	3	3	sll0855 putative channel transporter		1	3	3	3	8.6	8.6	8.6	48.424	451	13.3542	13.4582	13.5787	13.4637	13.5742	13.4393	13.4163	13.4766	1.00897	0.882595
sll0856	sll0856	1	1	1	sll0856 RNA polymerase ECF-type (group 3) sigma-E factor		1	1	1	1	5.4	5.4	5.4	21.82	186	10.8093	10.867	10.9231	10.8665	11.0514	10.9189	10.8708	10.947	1.05741	0.284909
sll0858	sll0858	7	7	7	sll0858 hypothetical protein		1	7	7	7	31.5	31.5	31.5	22.6	197	16.4458	16.3922	16.7111	16.5164	16.487	16.4269	16.4161	16.4433	0.950632	0.538783
sll0860	sll0860	3	3	3	sll0860 hypothetical protein		1	3	3	3	28.9	28.9	28.9	19.309	173	14.8724	14.9368	14.9579	14.9223	14.9136	14.9774	14.9383	14.9431	1.01448	0.552351
sll0861	sll0861	6	6	6	sll0861 hypothetical protein		1	6	6	6	27.2	27.2	27.2	32.18	305	16.2516	16.2718	16.3339	16.2858	16.1733	16.2683	16.3165	16.2527	0.977353	0.543636
sll0862	sll0862	4	4	4	sll0862 hypothetical protein		1	4	4	4	14.9	14.9	14.9	54.401	503	15.0925	15.1193	15.1464	15.1194	15.3145	15.2099	15.2467	15.2571	1.10012	0.0284685
sll0864	sll0864	1	1	1	sll0864 hypothetical protein		1	1	1	1	5.7	5.7	5.7	18.062	157	6.86642	7.30288	11.8204	8.66325	12.9601	7.06544	7.23712	9.08756	1.34193	0.873868
sll0865	sll0865	5	5	5	sll0865 excinuclease ABC subunit C		1	5	5	5	8.8	8.8	8.8	71.896	626	14.441	14.5725	14.6466	14.5534	14.5885	14.6923	14.6612	14.6474	1.06731	0.258719
sll0867	sll0867	8	8	8	sll0867 hypothetical protein		1	8	8	8	23.9	23.9	23.9	45.797	402	15.7372	15.7806	15.7984	15.7721	15.7091	15.7217	15.7963	15.7424	0.979607	0.422211
sll0868	sll0868	1	1	1	sll0868 lipoic acid synthetase		1	1	1	1	5	5	5	34.267	303	10.2249	10.455	10.388	10.356	10.5867	10.6237	10.1681	10.4595	1.07437	0.56919
sll0871	sll0871	2	2	2	sll0871 hypothetical protein		1	2	2	2	16.2	16.2	16.2	15.806	142	13.21	13.38	13.4305	13.3402	13.2244	13.5644	14.6675	13.8188	1.39341	0.38651
sll0872	sll0872	4	4	4	sll0872 unknown protein		1	4	4	4	28.5	28.5	28.5	13.929	130	17.5596	17.5512	17.7484	17.6197	17.5749	17.5346	17.5389	17.5495	0.95248	0.389474
sll0873	sll0873	6	6	6	sll0873 carboxynorspermidine decarboxylase		1	6	6	6	19.9	19.9	19.9	43.231	387	16.5236	16.3557	16.3099	16.3964	16.2288	16.4193	17.5209	16.723	1.25403	0.503769
sll0876	sll0876	1	1	1	sll0876 Holliday junction DNA helicase RuvA		1	1	1	1	4.7	4.7	4.7	23.189	211	13.5317	13.6828	13.8524	13.689	13.5272	13.48	13.4523	13.4865	0.869068	0.154393
sll0877	sll0877	11	11	11	sll0877 hypothetical protein		1	11	11	11	35.7	35.7	35.7	51.885	456	16.5218	16.4958	16.5192	16.5123	16.4014	16.4326	16.4145	16.4162	0.935563	0.00147126
sll0886	sll0886	8	8	8	sll0886 hypothetical protein		1	8	8	8	27.6	27.6	27.6	30.962	279	16.086	16.121	16.0294	16.0788	16.2193	16.2362	16.256	16.2371	1.116	0.0167354
sll0887	sll0887	12	12	12	sll0887 putative modulator of DNA gyrase; PmbA homolog		1	12	12	12	36.5	36.5	36.5	47.599	446	17.1069	17.0076	16.9985	17.0377	17.0775	16.94	16.9501	16.9892	0.966952	0.439893
sll0888	sll0888	4	4	4	sll0888 hypothetical protein		1	4	4	4	20	20	20	21.873	190	15.3058	15.4043	15.278	15.3294	15.2889	15.4223	15.3375	15.3496	1.0141	0.730416
sll0891	sll0891	8	8	8	sll0891 malate dehydrogenase		1	8	8	8	37.3	37.3	37.3	34.345	324	16.5743	16.6412	16.6033	16.6063	16.5235	16.5174	16.5533	16.5314	0.949417	0.0402204
sll0892	sll0892	1	1	1	sll0892 aspartate 1-decarboxylase		1	1	1	1	8.3	8.3	8.3	16.129	145	11.6741	11.5852	11.7363	11.6652	11.8	11.6484	11.833	11.7605	1.06828	0.259312
sll0895	sll0895	5	5	5	sll0895 CysQ protein homolog		1	5	5	5	24.7	24.7	24.7	32.197	291	14.91	14.9962	15.0831	14.9964	15.2154	15.2014	15.2281	15.2149	1.16352	0.0456252
sll0896	sll0896	1	1	1	sll0896 Holliday juction resolvase RuvC		1	1	1	1	5.4	5.4	5.4	18.193	167	11.2608	11.1807	11.0828	11.1748	10.9569	10.7694	10.8158	10.8473	0.796963	0.012996
sll0897	sll0897	18	18	18	sll0897 DnaJ protein, heat shock protein 40, molecular chaperone		1	18	18	18	45.4	45.4	45.4	40.794	377	17.9626	17.9829	18.0456	17.997	18.0724	18.0882	18.0883	18.083	1.06138	0.0693032
sll0898	sll0898	4	4	4	sll0898 hypothetical protein		1	4	4	4	13	13	13	41.89	369	13.7708	13.8073	13.8519	13.81	13.7341	13.7601	13.725	13.7397	0.952462	0.0780909
sll0899	sll0899	16	16	16	sll0899 UDP-N-acetylglucosamine pyrophosphorylase		1	16	16	16	40.6	40.6	40.6	48.923	456	17.3506	17.3991	17.3836	17.3778	17.3247	17.4066	17.4266	17.386	1.0057	0.827344
sll0900	sll0900	5	5	5	sll0900 ATP phosphoribosyltransferase		1	5	5	5	25.7	25.7	25.7	23.436	210	15.863	15.8442	15.9549	15.8873	15.873	15.9409	15.8471	15.887	0.999762	0.994176
sll0901	sll0901	3	3	3	sll0901 phosphoribosylaminoimidazole carboxylase		1	3	3	3	16.5	16.5	16.5	18.603	176	15.9547	16.0298	16.0363	16.0069	15.9856	15.9891	16.0062	15.9936	0.990836	0.66632
sll0902	sll0902	9	9	9	sll0902 ornithine carbamoyltransferase		1	9	9	9	35.7	35.7	35.7	33.616	308	16.0798	16.2267	15.9616	16.0894	15.8443	16.1454	16.2988	16.0962	1.00475	0.967228
sll0905	sll0905	3	3	3	sll0905 hypothetical protein		1	3	3	3	28.7	28.7	28.7	20.609	195	14.6685	14.7283	14.6392	14.6787	14.7622	14.8471	14.431	14.6801	1.00098	0.992212
sll0909	sll0909	10	10	10	sll0909 unknown protein		1	10	10	10	55.3	55.3	55.3	26.368	228	16.2462	16.305	16.3246	16.2919	16.4583	16.4317	16.4252	16.4384	1.10686	0.0138294
sll0910	sll0910	6	6	6	sll0910 unknown protein		1	6	6	6	14	14	14	41.421	363	16.0418	15.9795	16.0565	16.0259	16.2003	15.998	16.1482	16.1155	1.06405	0.27551
sll0911	sll0911	4	4	4	sll0911 unknown protein		1	4	4	4	25.8	25.8	25.8	14.809	128	16.0934	16.1221	16.0791	16.0982	16.0287	16.1136	16.075	16.0724	0.982285	0.419613
sll0912	sll0912	13	13	13	sll0912 ABC transporter ATP binding protein		1	13	13	13	21.4	21.4	21.4	72.173	636	17	16.9306	16.9097	16.9468	16.9477	16.9367	16.9373	16.9406	0.995713	0.842017
sll0913	sll0913	3	3	3	sll0913 hypothetical protein		1	3	3	3	15.9	15.9	15.9	22.997	201	14.4248	14.5127	14.4966	14.4781	14.4694	14.3999	14.4131	14.4275	0.96556	0.219362
sll0914	sll0914	5	5	5	sll0914 unknown protein		1	5	5	5	17.3	17.3	17.3	43.018	376	14.1765	14.164	14.2452	14.1952	14.1167	14.2801	14.2401	14.2123	1.0119	0.777902
sll0915	sll0915	15	15	15	sll0915 periplasmic protease		1	15	15	15	32.4	32.4	32.4	59.588	524	17.5302	17.4295	17.3124	17.424	17.5583	17.5358	17.531	17.5417	1.08495	0.200774
sll0916	sll0916	1	1	1	sll0916 precorrin isomerase, precorrin-8X methylmutase		1	1	1	1	10.1	10.1	10.1	23.363	217	13.3886	13.2566	13.2061	13.2838	13.2443	13.2796	13.2891	13.271	0.991168	0.838551
sll0920	sll0920	28	28	28	sll0920 phosphoenolpyruvate carboxylase		1	28	28	28	29.3	29.3	29.3	118.94	1034	18.2648	18.2356	18.2656	18.2553	18.3046	18.2712	18.2829	18.2863	1.02167	0.0902011
sll0921	sll0921	5	5	5	sll0921 two-component response regulator NarL subfamily		1	5	5	5	22.1	22.1	22.1	24.165	222	15.0694	15.021	14.8568	14.9824	14.9679	14.9348	14.859	14.9206	0.958043	0.454322
sll0923	sll0923	15	15	15	sll0923 unknown protein		1	15	15	15	25.7	25.7	25.7	83.64	756	18.1431	18.1596	18.2266	18.1764	18.2692	18.2585	18.2587	18.2621	1.06117	0.0759657
sll0925	sll0925	4	4	4	sll0925 hypothetical protein		1	4	4	4	20.3	20.3	20.3	22.996	202	15.6392	15.5746	15.5977	15.6038	15.6662	15.6626	15.5589	15.6293	1.0178	0.568155
sll0927	sll0927	13	13	13	sll0927 S-adenosylmethionine synthetase		1	13	13	13	37.2	37.2	37.2	43.898	409	17.4484	17.4094	17.2889	17.3822	17.3061	17.3764	17.3595	17.3473	0.97608	0.557009
sll0928	sll0928	12	12	12	sll0928 allophycocyanin-B		1	12	12	12	67.7	67.7	67.7	17.923	161	19.5517	19.582	19.5936	19.5757	19.5874	19.6203	19.6292	19.6123	1.02568	0.109424
sll0931	sll0931	6	6	6	sll0931 hypothetical protein		1	6	6	6	50	50	50	16.589	156	16.376	16.2978	16.3181	16.3306	16.2466	16.2354	16.1676	16.2165	0.923957	0.0286194
sll0932	sll0932	2	2	2	sll0932 hypothetical protein		1	2	2	2	7.7	7.7	7.7	36.723	337	13.553	13.4268	13.4561	13.4787	13.731	13.8514	13.8351	13.8058	1.25454	0.00365233
sll0933	sll0933	1	1	1	sll0933 hypothetical protein		1	1	1	1	8.2	8.2	8.2	17.647	158	12.5616	12.5809	12.8158	12.6528	12.5369	12.5069	12.7339	12.5925	0.959111	0.608517
sll0934	sll0934	9	9	9	sll0934 carboxysome formation protein CcmA		1	9	9	9	37.6	37.6	37.6	37.633	351	16.3903	16.4177	16.6041	16.4707	16.576	16.5943	16.6464	16.6056	1.09798	0.174309
sll0936	sll0936	14	14	14	sll0936 putative oxidoreductase		1	14	14	14	32.5	32.5	32.5	55.201	501	17.2334	17.2771	17.3621	17.2909	17.1927	17.1823	17.2307	17.2019	0.940178	0.129645
sll0938	sll0938	5	5	5	sll0938 aspartate transaminase		1	5	5	5	13.3	13.3	13.3	42.071	391	15.3718	15.3961	15.4299	15.3993	15.322	15.4695	15.4938	15.4284	1.02041	0.648395
sll0939	sll0939	1	1	1	sll0939 hypothetical protein		1	1	1	1	8	8	8	14.285	125	14.0101	13.9792	14.1848	14.0581	14.0207	14.0454	14.0602	14.0421	0.989008	0.827966
sll0943	sll0943	5	5	4	sll0943 unknown protein		1	5	5	4	23.2	23.2	20	25.684	220	14.0015	14.0657	14.059	14.0421	14.1386	14.0423	14.0658	14.0822	1.0282	0.327352
sll0944	sll0944	1	1	1	sll0944 hypothetical protein		1	1	1	1	6.7	6.7	6.7	18.152	164	11.1718	10.9521	10.4936	10.8725	10.0828	9.78919	9.79835	9.89011	0.506147	0.0232371
sll0945	sll0945	17	17	17	sll0945 glycogen synthase		1	17	17	17	45.5	45.5	45.5	54.346	477	18.2351	18.2354	18.1854	18.2186	18.2712	18.2685	18.2545	18.2648	1.0325	0.0977807
sll0947	sll0947	11	11	11	sll0947 light repressed protein A homolog		1	11	11	11	66	66	66	21.895	191	19.0043	19.0445	19.0218	19.0236	18.8977	18.9915	18.9775	18.9556	0.953956	0.132385
sll0980	sll0980	5	5	5	sll0980 unknown protein		1	5	5	5	14.9	14.9	14.9	43.823	396	15.0003	15.0826	15.3715	15.1514	15.1225	15.2258	15.2607	15.203	1.03638	0.701251
sll0981	sll0981	5	5	5	sll0981 unknown protein		1	5	5	5	34.5	34.5	34.5	18.894	165	14.6629	14.7548	14.863	14.7602	14.5747	14.5538	14.6693	14.5993	0.89443	0.0898846
sll0982	sll0982	8	8	8	sll0982 unknown protein		1	8	8	8	78.9	78.9	78.9	14.283	128	17.378	17.524	17.3496	17.4172	17.3797	17.654	17.4968	17.5101	1.06655	0.395032
sll0985	sll0985	7	7	7	sll0985 unknown protein		1	7	7	7	14.6	14.6	14.6	76.583	680	15.8082	15.9552	15.9844	15.9159	15.8959	15.9792	15.9779	15.951	1.0246	0.606638
sll0990	sll0990	13	13	13	sll0990 glutathione-dependent formaldehyde dehydrogenase		1	13	13	13	44.7	44.7	44.7	39.21	369	18.5413	18.5117	18.5889	18.5473	18.4526	18.425	18.4118	18.4298	0.921767	0.0184448
sll0992	sll0992	1	1	1	sll0992 putative esterase		1	1	1	1	3.3	3.3	3.3	30.562	276	13.3133	13.0927	13.15	13.1853	13.2663	12.7939	13.4166	13.1589	0.981884	0.904465
sll0993	sll0993	1	1	1	sll0993 potassium channel		1	1	1	1	2.5	2.5	2.5	40.513	365	10.6594	10.87	10.691	10.7401	10.6538	10.7275	10.812	10.7311	0.993753	0.916004
sll0994	sll0994	2	2	2	sll0994 hypothetical protein		1	2	2	2	7.8	7.8	7.8	29.32	269	13.4521	13.5074	13.5113	13.4903	13.3067	13.2529	13.2981	13.2859	0.867914	0.00139062
sll0995	sll0995	3	3	3	sll0995 hypothetical protein		1	3	3	3	11.7	11.7	11.7	26.229	231	14.5477	14.5419	14.4939	14.5278	14.5127	14.442	14.4281	14.4609	0.954698	0.11034
sll0996	sll0996	7	7	7	sll0996 hypothetical protein		1	7	7	7	16.4	16.4	16.4	50.956	451	16.9923	17.0241	17.0107	17.0091	17.0517	17.0611	17.0023	17.0384	1.02053	0.247818
sll0997	sll0997	10	10	10	sll0997 hypothetical protein		1	10	10	10	38.6	38.6	38.6	40.674	363	16.7192	16.6838	16.6538	16.6856	16.7392	16.6901	16.6994	16.7096	1.01674	0.380274
sll0998	sll0998	11	11	11	sll0998 LysR family transcriptional regulator		1	11	11	11	41.7	41.7	41.7	38.017	345	17.7608	17.7467	17.6982	17.7352	17.5841	17.5928	17.5341	17.5703	0.892	0.00333001
sll1002	sll1002	9	9	9	sll1002 hypothetical protein YCF22		1	9	9	9	23.5	23.5	23.5	49.208	456	15.6887	15.7213	15.7011	15.7037	16.0338	15.958	15.9961	15.996	1.22459	0.0018251
sll1004	sll1004	8	8	8	sll1004 hypothetical protein		1	8	8	8	21.8	21.8	21.8	43.849	394	16.0318	15.9848	16.1283	16.0483	16.2896	16.2571	16.1881	16.245	1.14602	0.0231483
sll1005	sll1005	1	1	1	sll1005 MazG protein homolog		1	1	1	1	4.8	4.8	4.8	30.244	269	10.6417	10.7963	10.7626	10.7335	10.3307	10.6247	10.7029	10.5528	0.882238	0.247742
sll1006	sll1006	1	1	1	sll1006 unknown protein		1	1	1	1	2.5	2.5	2.5	41.385	365	13.3481	13.3786	13.402	13.3762	13.7107	13.7328	13.6846	13.7094	1.25977	9.90939e-05
sll1009	sll1009	8	8	8	sll1009 unknown protein		1	8	8	8	16.6	16.6	16.6	60.483	591	17.8386	17.887	17.8315	17.8524	19.204	19.0705	19.0905	19.1217	2.41048	0.000215145
sll1011	sll1011	3	3	3	sll1011 hypothetical protein		1	3	3	3	17	17	17	29.996	270	13.7712	13.7594	13.8817	13.8041	13.9579	13.9341	13.9431	13.945	1.1026	0.0644594
sll1017	sll1017	3	3	3	sll1017 ammonium/methylammonium permease		1	3	3	3	5.2	5.2	5.2	47.171	442	16.606	16.4809	16.5527	16.5465	16.4418	16.4491	16.4379	16.4429	0.930696	0.102374
sll1018	sll1018	9	9	9	sll1018 dihydroorotase		1	9	9	9	20.4	20.4	20.4	48.174	441	16.6711	16.7018	16.6133	16.6621	16.7737	16.7477	16.6489	16.7234	1.04344	0.262061
sll1019	sll1019	4	4	4	sll1019 hydroxyacylglutathione hydrolase		1	4	4	4	16.3	16.3	16.3	28.724	257	14.9637	15.0341	15.109	15.0356	15.0689	15.0227	15.0022	15.0313	0.996999	0.931683
sll1020	sll1020	3	3	3	sll1020 probable glycosyltransferase		1	3	3	3	6.6	6.6	6.6	31.338	273	15.3414	15.65	15.8457	15.6124	15.6511	15.8497	15.8573	15.786	1.12787	0.36608
sll1021	sll1021	31	31	31	sll1021 hypothetical protein		1	31	31	31	44.1	44.1	44.1	74.423	673	18.9829	18.9411	19.0087	18.9776	18.9422	18.9356	19.0179	18.9653	0.991517	0.729278
sll1022	sll1022	1	1	1	sll1022 hypothetical protein		1	1	1	1	6.6	6.6	6.6	26.782	242	12.8553	12.802	12.9178	12.8584	12.9751	12.7499	12.7633	12.8294	0.980097	0.743245
sll1023	sll1023	9	9	9	sll1023 succinyl-CoA synthetase beta chain		1	9	9	9	24.4	24.4	24.4	44.052	401	17.8447	17.8537	17.7835	17.8273	17.8395	17.8018	18.0145	17.8853	1.04101	0.475551
sll1025	sll1025	4	4	4	sll1025 hypothetical protein		1	4	4	4	12	12	12	42.971	392	16.1141	16.1422	16.3252	16.1938	16.1331	16.1825	16.1917	16.1691	0.982999	0.749027
sll1027	sll1027	25	25	25	sll1027 NADH-dependent glutamate synthase small subunit		1	25	25	25	62.6	62.6	62.6	54.144	494	18.7547	18.8048	18.8154	18.7916	18.8736	18.8867	18.8904	18.8835	1.06579	0.0317417
sll1028	sll1028	8	8	6	sll1028 carbon dioxide concentrating mechanism protein CcmK		1	8	8	6	86.4	86.4	67	11.135	103	18.7561	18.7387	18.8028	18.7659	18.9384	18.8691	18.9108	18.9061	1.1021	0.00730168
sll1029	sll1029	8	6	6	sll1029 carbon dioxide concentrating mechanism protein CcmK		1	8	6	6	85.6	67.6	67.6	12.102	111	18.23	18.2443	18.3294	18.2679	18.3748	18.3658	18.3591	18.3666	1.07078	0.083314
sll1031	sll1031	30	30	30	sll1031 carbon dioxide concentrating mechanism protein CcmM, putative carboxysome structural protein		1	30	30	30	48.2	48.2	48.2	73.12	687	20.1566	20.1646	20.1955	20.1722	20.0906	20.1049	20.1026	20.0994	0.950746	0.0162062
sll1032	sll1032	5	5	5	sll1032 carbon dioxide concentrating mechanism protein CcmN, putative carboxysome assembly protein		1	5	5	5	29	29	29	25.057	241	14.83	14.9176	14.9504	14.8993	14.9321	14.9775	14.9597	14.9565	1.04041	0.248455
sll1033	sll1033	12	12	12	sll1033 probable protein phosphatase		1	12	12	12	24.6	24.6	24.6	73.711	668	17.5592	17.5251	17.6177	17.5673	17.3997	17.4556	17.4883	17.4479	0.920511	0.0332552
sll1035	sll1035	8	8	8	sll1035 uracil phosphoribosyltransferase		1	8	8	8	37.5	37.5	37.5	23.637	216	16.7004	16.6979	16.6759	16.6914	16.6656	16.5759	16.5248	16.5888	0.931334	0.12542
sll1036	sll1036	5	5	5	sll1036 hypothetical protein		1	5	5	5	20.2	20.2	20.2	32.623	292	15.4532	15.4255	15.5227	15.4671	15.3711	15.3319	15.4457	15.3829	0.943287	0.130656
sll1037	sll1037	2	2	2	sll1037 unknown protein		1	2	2	2	3.9	3.9	3.9	55.311	491	12.1586	12.5393	12.47	12.3893	12.5825	12.8198	12.8148	12.739	1.27429	0.0771262
sll1039	sll1039	5	5	5	sll1039 hypothetical protein		1	5	5	5	14.1	14.1	14.1	38.545	334	17.1523	17.1213	17.1196	17.1311	17.1371	17.0312	16.9927	17.0537	0.947793	0.210299
sll1041	sll1041	11	11	11	sll1041 similar to sulfate transport ATP-binding protein CysA		1	11	11	11	44.6	44.6	44.6	28.656	260	16.6607	16.6208	16.6748	16.6521	16.6629	16.6433	16.6356	16.6473	0.996668	0.807653
sll1043	sll1043	31	31	31	sll1043 polyribonucleotide nucleotidyltransferase		1	31	31	31	46.1	46.1	46.1	77.83	718	19.572	19.6125	19.6722	19.6189	19.864	19.8117	19.8506	19.8421	1.16734	0.00614324
sll1045	sll1045	3	3	3	sll1045 mutator MutT protein		1	3	3	3	25	25	25	15.152	136	15.5263	15.5491	15.6528	15.5761	15.5383	15.7092	15.6221	15.6232	1.03318	0.497426
sll1049	sll1049	15	15	15	sll1049 hypothetical protein		1	15	15	15	31.7	31.7	31.7	63.949	564	17.1712	17.1664	17.2242	17.1873	17.1085	17.092	17.1244	17.1083	0.946746	0.0325865
sll1051	sll1051	5	5	5	sll1051 phycocyanin alpha-subunit phycocyanobilin lyase		1	5	5	5	30.4	30.4	30.4	23.179	214	13.8816	13.954	13.8836	13.9064	13.8939	14.0108	14.0094	13.9714	1.04606	0.239832
sll1053	sll1053	22	22	22	sll1053 hypothetical protein		1	22	22	22	55.2	55.2	55.2	56.258	520	17.99	17.9777	18.0543	18.0073	18.1558	18.0902	18.0943	18.1134	1.07633	0.029623
sll1054	sll1054	5	5	5	sll1054 hypothetical protein		1	5	5	5	34.2	34.2	34.2	21.03	187	15.4793	15.5205	15.572	15.5239	15.5069	15.6128	15.5992	15.573	1.03459	0.317497
sll1056	sll1056	21	21	21	sll1056 phosphoribosylformyl glycinamidine synthetase II		1	21	21	21	43.5	43.5	43.5	81.831	768	17.7573	17.7647	17.8319	17.7846	17.8224	17.766	17.8167	17.8017	1.01189	0.599197
sll1058	sll1058	8	8	8	sll1058 dihydrodipicolinate reductase		1	8	8	8	35.3	35.3	35.3	29.09	275	17.1971	17.1595	17.1664	17.1743	17.2007	17.1566	17.188	17.1818	1.00518	0.691946
sll1059	sll1059	8	8	8	sll1059 adenylate kinase		1	8	8	8	56.9	56.9	56.9	20.34	181	17.3965	17.434	17.3641	17.3982	17.2811	17.3316	17.3161	17.3096	0.940433	0.0277899
sll1060	sll1060	14	14	14	sll1060 hypothetical protein		1	14	14	14	13.1	13.1	13.1	114.82	1009	17.165	17.1726	17.1978	17.1785	17.2729	17.2243	17.2309	17.2427	1.04552	0.0308873
sll1061	sll1061	3	3	3	sll1061 unknown protein		1	3	3	3	24.6	24.6	24.6	19.861	171	14.3019	14.385	14.4182	14.3684	14.4973	14.5234	14.4874	14.5027	1.0976	0.049904
sll1062	sll1062	7	7	7	sll1062 unknown protein		1	7	7	7	48.8	48.8	48.8	14.606	125	15.0682	15.1058	15.0995	15.0912	15.0786	15.0194	15.0339	15.044	0.967824	0.101608
sll1063	sll1063	1	1	1	sll1063 hypothetical protein		1	1	1	1	7.3	7.3	7.3	23.996	219	11.3012	11.4122	11.2267	11.3133	11.1152	11.2849	10.8757	11.0919	0.857748	0.194838
sll1064	sll1064	9	9	9	sll1064 hypothetical protein		1	9	9	9	15	15	15	64.733	568	16.0356	16.0225	16.0072	16.0218	16.095	16.1146	16.0102	16.0733	1.03633	0.245724
sll1068	sll1068	1	1	1	sll1068 unknown protein		1	1	1	1	4.9	4.9	4.9	15.591	143	12.4404	12.56	12.4526	12.4843	12.8702	12.7698	12.8111	12.817	1.25936	0.00286418
sll1069	sll1069	10	10	10	sll1069 3-oxoacyl-[acyl-carrier-protein] synthase II		1	10	10	10	32.5	32.5	32.5	44.004	416	17.7536	17.7468	18.077	17.8591	17.7303	17.8032	17.8493	17.7943	0.956045	0.619205
sll1070	sll1070	22	22	22	sll1070 transketolase		1	22	22	22	40.7	40.7	40.7	71.724	670	19.58	19.5676	19.5809	19.5762	19.5612	19.5056	19.5402	19.5357	0.972317	0.121905
sll1071	sll1071	4	4	4	sll1071 hypothetical protein		1	4	4	4	16.4	16.4	16.4	30.532	275	16.0829	16.0506	16.0661	16.0665	16.0204	16.0467	15.9927	16.0199	0.968239	0.0759929
sll1072	sll1072	4	4	4	sll1072 hypothetical protein		1	4	4	4	23.3	23.3	23.3	25.182	223	14.2	14.0452	14.4812	14.2421	14.1869	14.0849	14.1342	14.1354	0.928671	0.493363
sll1074	sll1074	24	24	24	sll1074 leucyl-tRNA synthetase		1	24	24	24	36	36	36	98.294	869	18.4176	18.3904	18.3095	18.3725	18.3522	18.3839	18.3419	18.3593	0.990903	0.733974
sll1076	sll1076	4	4	4	sll1076 cation-transporting ATPase PacL		1	4	4	4	2.8	2.8	2.8	104.98	962	14.675	14.694	14.9389	14.7693	14.6703	14.629	14.6592	14.6528	0.922432	0.303196
sll1077	sll1077	4	4	4	sll1077 agmatinase		1	4	4	4	10.5	10.5	10.5	42.963	390	16.73	16.6892	16.8071	16.7421	16.7526	16.7419	16.7606	16.7517	1.00669	0.80803
sll1080	sll1080	4	4	4	sll1080 ABC transport system substrate-binding protein		1	4	4	4	11.9	11.9	11.9	38.209	352	15.2768	15.1719	15.5139	15.3208	15.2183	15.2308	15.3072	15.2521	0.953464	0.57177
sll1081	sll1081	1	1	1	sll1081 ABC transport system permease protein		1	1	1	1	2.5	2.5	2.5	30.98	280	13.9969	13.9813	14.0084	13.9955	14.2325	14.1236	14.1705	14.1755	1.13286	0.0238748
sll1082	sll1082	4	4	4	sll1082 ABC transport system ATP-binding protein		1	4	4	4	15.4	15.4	15.4	29.92	266	14.4183	14.4813	14.4216	14.4404	14.1483	14.2521	14.1887	14.1964	0.844378	0.00406946
sll1084	sll1084	9	9	9	sll1084 hypothetical protein		1	9	9	9	13.3	13.3	13.3	97.388	865	16.6105	16.6341	16.721	16.6552	16.686	16.6883	16.7405	16.705	1.0351	0.280519
sll1085	sll1085	11	11	11	sll1085 glycerol-3-phosphate dehydrogenase		1	11	11	11	26.4	26.4	26.4	61.574	553	16.1074	16.0857	16.0898	16.0943	16.1994	16.1495	16.1367	16.1619	1.04792	0.0590307
sll1087	sll1087	4	4	4	sll1087 similar to sodium/glucose cotransporter		1	4	4	4	7.4	7.4	7.4	54.359	512	15.2331	15.1757	14.9776	15.1288	15.0712	15.0258	15.0335	15.0435	0.942607	0.38564
sll1089	sll1089	5	5	5	sll1089 periplasmic protein, function unknown		1	5	5	5	22.5	22.5	22.5	23.491	213	14.9659	15.0272	14.9852	14.9927	15.1093	15.0428	15.1163	15.0895	1.06934	0.0337771
sll1091	sll1091	23	23	23	sll1091 geranylgeranyl hydrogenase		1	23	23	23	56.8	56.8	56.8	44.882	407	19.7575	19.781	19.8228	19.7871	19.9075	19.9253	19.9183	19.917	1.09423	0.0156323
sll1092	sll1092	1	1	1	sll1092 hypothetical protein		1	1	1	1	8.6	8.6	8.6	14.814	128	10.9813	11.0226	10.9375	10.9805	10.7845	11.0889	10.9543	10.9426	0.974091	0.71409
sll1095	sll1095	1	1	1	sll1095 hypothetical protein		1	1	1	1	4.7	4.7	4.7	23.456	211	10.3367	10.3519	10.4777	10.3888	10.4632	10.5167	10.4221	10.4673	1.05595	0.222453
sll1096	sll1096	3	3	3	sll1096 30S ribosomal protein S12		1	3	3	3	14.3	14.3	14.3	14.176	126	15.6494	15.6834	15.6159	15.6496	16.1793	15.9742	15.9937	16.0491	1.31906	0.0189003
sll1097	sll1097	7	7	7	sll1097 30S ribosomal protein S7		1	7	7	7	55.8	55.8	55.8	17.384	156	17.0948	17.1491	17.1225	17.1221	17.1333	17.1139	17.1334	17.1269	1.00329	0.800086
sll1098	sll1098	23	23	23	sll1098 elongation factor EF-G		1	23	23	23	44.4	44.4	44.4	75.43	691	18.8763	18.8446	18.7207	18.8138	18.5825	18.5877	18.6112	18.5938	0.858531	0.0395988
sll1099	sll1099	28	28	28	sll1099 elongation factor Tu		1	28	28	28	78.9	78.9	78.9	43.733	399	21.1116	21.1266	21.0954	21.1112	20.9814	21.0232	21.0383	21.0143	0.935047	0.0146215
sll1101	sll1101	8	8	8	sll1101 30S ribosomal protein S10		1	8	8	8	70.5	70.5	70.5	12.037	105	18.5211	18.4117	18.4193	18.4507	18.5457	18.4317	18.4162	18.4645	1.00964	0.810434
sll1102	sll1102	1	1	1	sll1102 integral membrane protein (small) of a TRAP-type permease that mediates sodium-dependent glutamate transport GtrA		1	1	1	1	7.8	7.8	7.8	20.179	179	13.2742	13.2791	13.7216	13.425	13.2345	13.4363	13.3818	13.3509	0.949931	0.67886
sll1103	sll1103	1	1	1	sll1103 integral membrane protein (large) of a TRAP-type permease that mediates sodium-dependent glutamate transport GtrB		1	1	1	1	1.8	1.8	1.8	47.307	445	12.7294	12.796	12.7528	12.7594	13.0173	12.9694	12.9997	12.9955	1.17778	0.00096768
sll1104	sll1104	1	1	1	sll1104 periplasmic substrate-binding protein of a TRAP-type permease that mediates sodium-dependent glutamate transport GtrC		1	1	1	1	3	3	3	32.661	296	11.6538	11.7592	11.9442	11.7857	11.9598	11.8331	11.8236	11.8722	1.06175	0.432505
sll1106	sll1106	8	8	8	sll1106 hypothetical protein		1	8	8	8	53.2	53.2	53.2	18.031	171	18.3947	18.3948	18.3328	18.3741	18.4112	18.459	18.7635	18.5446	1.12542	0.260223
sll1107	sll1107	2	2	2	sll1107 type IV pilus biogenesis protein PilI homolog		1	2	2	2	8.1	8.1	8.1	28.432	258	14.6331	14.6496	14.7459	14.6762	14.7965	14.6923	14.7063	14.7317	1.03923	0.312102
sll1108	sll1108	5	5	5	sll1108 stationary-phase survival protein SurE homolog		1	5	5	5	21.8	21.8	21.8	30.464	275	16.0118	16.0107	15.9256	15.9827	16.2177	15.9147	15.8579	15.9967	1.00978	0.913041
sll1109	sll1109	2	2	2	sll1109 hypothetical protein		1	2	2	2	14.9	14.9	14.9	22.04	194	16.7452	16.8082	16.6422	16.7318	16.4733	16.6469	16.6062	16.5755	0.897273	0.093899
sll1110	sll1110	17	17	17	sll1110 peptide chain release factor 1		1	17	17	17	54.5	54.5	54.5	41.126	365	18.4065	18.4031	18.3447	18.3848	18.2794	18.2902	18.2623	18.2773	0.928236	0.0210726
sll1112	sll1112	1	1	1	sll1112 3-dehydroquinate dehydratase		1	1	1	1	7.9	7.9	7.9	16.374	152	10.1749	10.6533	10.6629	10.497	10.3581	10.8612	10.5914	10.6036	1.07666	0.649342
sll1118	sll1118	4	4	4	sll1118 hypothetical protein		1	4	4	4	45.4	45.4	45.4	11.45	108	14.7931	14.8709	14.7624	14.8088	14.3428	14.4027	14.4008	14.3821	0.743966	0.000944384
sll1119	sll1119	1	1	1	sll1119 hypothetical protein		1	1	1	1	2.8	2.8	2.8	40.913	361				#DIV/0!				#DIV/0!	#DIV/0!	#DIV/0!
sll1120	sll1120	21	21	21	sll1120 chromosome segregation protein SMC1		1	21	21	21	19.2	19.2	19.2	136.13	1200	17.317	17.369	17.3873	17.3578	17.4119	17.3869	17.6044	17.4678	1.07922	0.246265
sll1121	sll1121	8	8	8	sll1121 hypothetical protein		1	8	8	8	16.6	16.6	16.6	85.496	770	16.4777	16.4898	16.6542	16.5406	16.5145	16.6099	16.5938	16.5727	1.02254	0.650375
sll1123	sll1123	2	2	2	sll1123 hypothetical protein		1	2	2	2	11.7	11.7	11.7	28.896	256	11.4504	11.5176	11.8081	11.592	11.8229	11.7346	11.8773	11.8116	1.16436	0.173622
sll1124	sll1124	6	6	6	sll1124 two-component sensor histidine kinase, phytochrome-like protein		1	6	6	6	4	4	4	154.57	1371	15.5225	15.6171	15.6953	15.6116	15.6815	15.7062	15.7279	15.7052	1.067	0.196204
sll1127	sll1127	10	10	10	sll1127 1,4-dihydroxy-2-naphthoate synthase		1	10	10	10	38.2	38.2	38.2	30.307	275	17.3207	17.3217	17.6503	17.4309	17.3672	17.4436	17.4551	17.422	0.99382	0.943456
sll1129	sll1129	3	3	3	sll1129 2-hydroxy-6-oxohepta-2,4-dienoate hydrolase		1	3	3	3	10.1	10.1	10.1	32.773	296	15.194	15.187	15.073	15.1513	15.0034	15.0768	15.0797	15.0533	0.934291	0.115043
sll1130	sll1130	5	5	5	sll1130 unknown protein		1	5	5	5	52.2	52.2	52.2	12.933	115	17.5015	17.5946	17.3459	17.4807	17.1144	17.32	17.2924	17.2423	0.847695	0.0707969
sll1132	sll1132	1	1	1	sll1132 unknown protein		1	1	1	1	1.9	1.9	1.9	55.016	483	11.2676	11.383	11.3678	11.3395	11.6137	11.1751	11.5809	11.4565	1.08454	0.497124
sll1135	sll1135	2	2	2	sll1135 unknown protein		1	2	2	2	7.5	7.5	7.5	35.994	334	14.1738	14.196	13.9358	14.1019	14.0841	14.1037	14.127	14.105	1.00214	0.973935
sll1138	sll1138	4	4	4	sll1138 hypothetical protein		1	4	4	4	14.5	14.5	14.5	27.901	248	16.6338	16.5688	16.5272	16.5766	16.5982	16.5531	16.5647	16.572	0.996821	0.901307
sll1142	sll1142	2	2	2	sll1142 hypothetical protein		1	2	2	2	13.9	13.9	13.9	19.415	173	12.9893	13.211	13.2327	13.1443	13.0835	13.0199	13.2348	13.1127	0.978319	0.769445
sll1143	sll1143	24	24	24	sll1143 ATP-dependent helicase PcrA		1	24	24	24	32.5	32.5	32.5	90.166	791	18.5772	18.5499	18.5668	18.5646	18.5692	18.5133	18.6889	18.5905	1.01807	0.668862
sll1144	sll1144	8	8	8	sll1144 hypothetical protein		1	8	8	8	28.5	28.5	28.5	34.386	305	16.8931	16.9004	16.8051	16.8662	16.727	16.8066	16.6192	16.7176	0.9021	0.0929913
sll1147	sll1147	1	1	1	sll1147 glutathione S-transferase		1	1	1	1	11.7	11.7	11.7	15.414	137	13.2134	13.3302	13.3621	13.3019	13.5269	13.4238	13.5192	13.49	1.13921	0.0324105
sll1150	sll1150	1	1	1	sll1150 hypothetical protein		1	1	1	1	2.8	2.8	2.8	26.695	252	13.9603	14.0015	14.0064	13.9894	14.3951	14.1927	14.1504	14.2461	1.1947	0.0717791
sll1151	sll1151	10	10	10	sll1151 unknown protein		1	10	10	10	20.3	20.3	20.3	66.572	605	17.7097	17.6913	17.7066	17.7025	17.8205	17.8088	17.8199	17.8164	1.08213	0.000189312
sll1154	sll1154	2	2	2	sll1154 putative antibiotic efflux protein		1	2	2	2	6.2	6.2	6.2	44.721	418	12.412	12.5864	12.5924	12.5303	12.2723	12.46	12.5862	12.4395	0.939017	0.457882
sll1155	sll1155	3	3	3	sll1155 hypothetical protein		1	3	3	3	23.9	23.9	23.9	12.434	113	14.5627	14.6573	14.4697	14.5632	14.4548	14.5802	14.351	14.462	0.932237	0.304759
sll1157	sll1157	1	1	1	sll1157 putative transposase [ISY120b: 1385747 - 1386548]		1	1	1	1	10.1	10.1	10.1	16.334	138	10.592	10.3844	10.5416	10.506	10.1293	10.7207	10.1499	10.3333	0.887156	0.472108
sll1161	sll1161	2	2	2	sll1161 probable adenylate cyclase		1	2	2	2	6.6	6.6	6.6	37.099	335	15.0634	15.157	15.2273	15.1492	15.058	15.0265	15.0513	15.0453	0.93046	0.155304
sll1162	sll1162	1	1	1	sll1162 hypothetical protein		1	1	1	1	4.7	4.7	4.7	26.903	235	12.5275	12.4566	12.6207	12.5349	12.5003	12.2908	12.3526	12.3812	0.898928	0.125781
sll1165	sll1165	18	18	18	sll1165 DNA mismatch repair protein		1	18	18	18	24.8	24.8	24.8	101.39	912	16.7564	16.7971	16.6684	16.7406	16.8268	16.7836	16.7737	16.7947	1.03819	0.290675
sll1166	sll1166	1	1	1	sll1166 hypothetical protein		1	1	1	1	3.5	3.5	3.5	40.068	367	14.6103	14.471	14.3863	14.4892	14.3758	14.327	14.4591	14.3873	0.93178	0.265181
sll1167	sll1167	4	4	4	sll1167 unknown protein		1	4	4	4	11.1	11.1	11.1	44.56	414	15.2394	15.129	15.2436	15.204	15.2353	15.2027	15.2607	15.2329	1.02022	0.536761
sll1172	sll1172	11	11	11	sll1172 threonine synthase		1	11	11	11	32.5	32.5	32.5	40.414	382	16.7077	16.7237	16.6763	16.7026	16.8749	16.833	16.8632	16.857	1.11298	0.00123904
sll1173	sll1173	3	3	3	sll1173 hypothetical protein		1	3	3	3	10.2	10.2	10.2	28.014	244	11.5057	11.6232	11.5996	11.5762	11.5459	11.5124	11.5682	11.5422	0.976703	0.455705
sll1174	sll1174	2	2	2	sll1174 unknown protein		1	2	2	2	9.1	9.1	9.1	30.813	274	13.7817	13.7933	13.8251	13.8	13.8496	13.633	13.8504	13.7777	0.984631	0.788222
sll1178	sll1178	16	16	16	sll1178 probable carbamoyl transferase		1	16	16	16	30.7	30.7	30.7	69.141	615	18.2344	18.208	18.2414	18.2279	18.1915	18.179	18.2937	18.2214	0.995503	0.877066
sll1180	sll1180	23	23	23	sll1180 toxin secretion ABC transporter ATP-binding protein		1	23	23	23	26.2	26.2	26.2	112.09	1011	18.1481	18.1292	18.1208	18.1327	18.2195	18.1899	18.2398	18.2164	1.05972	0.0135589
sll1181	sll1181	30	30	30	sll1181 similar to hemolysin secretion protein		1	30	30	30	49.6	49.6	49.6	64.707	583	18.798	18.7975	18.8771	18.8242	18.983	18.9389	18.9602	18.9607	1.09923	0.0204921
sll1182	sll1182	3	3	3	sll1182 cytochrome b6-f complex alternative iron-sulfur subunit (Rieske iron sulfur protein)		1	3	3	3	47.4	47.4	47.4	13.72	133	16.3613	16.2624	16.4819	16.3685	16.0865	16.0173	15.9267	16.0101	0.780029	0.0126917
sll1184	sll1184	9	9	9	sll1184 heme oxygenase		1	9	9	9	54.2	54.2	54.2	27.05	240	17.8175	17.7827	17.7623	17.7875	17.845	17.7628	17.7985	17.8021	1.01017	0.641485
sll1185	sll1185	13	13	13	sll1185 coproporphyrinogen III oxidase, aerobic (oxygen-dependent)		1	13	13	13	47.6	47.6	47.6	38.937	340	17.6542	17.6532	17.6263	17.6446	17.7505	17.7013	17.7141	17.722	1.05513	0.0166814
sll1186	sll1186	4	4	4	sll1186 hypothetical protein		1	4	4	4	16.7	16.7	16.7	25.117	216	14.9451	14.9728	14.6902	14.8693	14.7308	14.9097	14.8816	14.8407	0.980346	0.802406
sll1187	sll1187	3	3	3	sll1187 prolipoprotein diacylglyceryl transferase		1	3	3	3	8.8	8.8	8.8	32.106	283	13.8535	13.9086	13.9836	13.9152	14.0056	14.1013	14.0107	14.0392	1.08974	0.0664072
sll1188	sll1188	8	8	8	sll1188 hypothetical protein		1	8	8	8	59.8	59.8	59.8	18.816	164	17.6074	17.6047	17.4886	17.5669	17.4136	17.4524	17.4381	17.4347	0.91245	0.0678556
sll1189	sll1189	5	5	5	sll1189 glycolate oxidase subunit GlcE		1	5	5	5	18	18	18	47.376	434	14.0801	14.0751	13.9401	14.0318	13.9297	13.9128	13.9259	13.9228	0.927269	0.139157
sll1191	sll1191	1	1	1	sll1191 hypothetical protein		1	1	1	1	9.7	9.7	9.7	11.15	103	12.7302	12.5641	12.4839	12.5927	12.5259	12.4762	12.5684	12.5235	0.953167	0.447387
sll1193	sll1193	3	3	3	sll1193 hypothetical protein		1	3	3	3	23	23	23	19.388	165	14.0486	14.0268	14.086	14.0538	13.7626	13.7856	13.6704	13.7395	0.80424	0.00451862
sll1194	sll1194	6	6	6	sll1194 photosystem II 12 kDa extrinsic protein		1	6	6	6	55.7	55.7	55.7	14.245	131	19.3895	19.395	19.3569	19.3805	19.2726	19.2791	19.1779	19.2432	0.909233	0.0397224
sll1196	sll1196	10	10	10	sll1196 phosphofructokinase		1	10	10	10	26.6	26.6	26.6	38.588	361	16.5904	16.6136	16.5414	16.5818	16.3644	16.3811	16.2625	16.336	0.843354	0.00881893
sll1198	sll1198	2	2	2	sll1198 tRNA (guanine-N1)-methyltransferase		1	2	2	2	10.8	10.8	10.8	25.948	231	12.3058	12.261	12.3031	12.29	12.1438	12.402	12.2144	12.2534	0.974964	0.683982
sll1200	sll1200	3	3	3	sll1200 hypothetical protein		1	3	3	3	6.1	6.1	6.1	42.24	391	16.4705	16.6292	16.9424	16.6807	16.5633	16.7062	16.7311	16.6669	0.990474	0.932554
sll1201;slr5077	sll1201;slr5077	8;7	1;0	1;0	sll1201 hypothetical protein;slr5077 hypothetical protein		2	8	1	1	31.4	5.7	5.7	30.301	264	12.0438	11.9753	12.0165	12.0119	11.9215	11.9195	11.8682	11.9031	0.927379	0.0152692
sll1202	sll1202	1	1	1	sll1202 iron(III) dicitrate-binding protein of ABC transporter, FecB homolog		1	1	1	1	2.3	2.3	2.3	39.559	347	13.7188	13.609	13.6099	13.6459	13.5206	13.4772	13.4737	13.4905	0.897875	0.0360301
sll1203	sll1203	1	1	1	sll1203 hypothetical protein		1	1	1	1	2.8	2.8	2.8	37.634	321	12.5973	12.8609	13.2484	12.9022	12.8859	12.9349	12.9367	12.9192	1.01185	0.936698
sll1209	sll1209	25	25	25	sll1209 DNA ligase		1	25	25	25	38.1	38.1	38.1	74.601	669	18.2371	18.2125	18.2733	18.241	18.2114	18.2002	18.2373	18.2163	0.983047	0.313214
sll1212	sll1212	19	19	19	sll1212 GDP-mannose 4,6-dehydratase		1	19	19	19	53	53	53	41.333	362	18.5267	18.5419	18.3833	18.4839	18.4925	18.5126	18.4687	18.4913	1.00509	0.899811
sll1213	sll1213	12	12	12	sll1213 GDP-fucose synthetase		1	12	12	12	45.2	45.2	45.2	34.719	312	17.6893	17.6989	17.7418	17.71	17.7208	17.6757	17.6887	17.6951	0.989686	0.516776
sll1214	sll1214	17	17	17	sll1214 hypothetical protein YCF59		1	17	17	17	48.6	48.6	48.6	42.153	358	17.937	17.935	17.9887	17.9536	18.0896	18.0635	18.0518	18.0683	1.08276	0.00849259
sll1217	sll1217	6	6	6	sll1217 unknown protein		1	6	6	6	29.8	29.8	29.8	25.604	225	16.1004	16.1394	16.0742	16.1046	16.102	16.1118	16.0903	16.1014	0.997727	0.881819
sll1218	sll1218	8	8	8	sll1218 hypothetical protein YCF39		1	8	8	8	41.1	41.1	41.1	23.534	219	17.1538	17.1951	17.2368	17.1953	17.2299	17.2185	17.3042	17.2509	1.0393	0.198106
sll1219	sll1219	1	1	1	sll1219 hypothetical protein		1	1	1	1	8.3	8.3	8.3	12.03	108	11.7139	11.6214	11.5605	11.6319	11.6673	11.5946	11.6394	11.6338	1.00128	0.972587
sll1220	sll1220	4	4	4	sll1220 putative diaphorase subunit of the bidirectional hydrogenase		1	4	4	4	34.7	34.7	34.7	18.759	173	15.7549	15.7695	15.8544	15.7929	15.4587	15.5355	15.4366	15.4769	0.803292	0.00185426
sll1221	sll1221	22	22	22	sll1221 diaphorase subunit of the bidirectional hydrogenase		1	22	22	22	52.5	52.5	52.5	57.774	533	17.8674	17.8319	17.9471	17.8821	17.6961	17.7253	17.6714	17.6976	0.879942	0.0188011
sll1222	sll1222	6	6	6	sll1222 hypothetical protein		1	6	6	6	25	25	25	24.229	212	14.592	14.5768	14.5979	14.5889	14.5987	14.6708	14.6175	14.629	1.0282	0.197948
sll1223	sll1223	9	9	9	sll1223 diaphorase subunit of the bidirectional hydrogenase		1	9	9	9	58	58	58	26.196	238	17.1208	17.025	17.2127	17.1195	16.952	16.8914	16.8482	16.8972	0.85721	0.0347197
sll1224	sll1224	4	4	4	sll1224 hydrogenase subunit of the bidirectional hydrogenase		1	4	4	4	39	39	39	19.958	182	15.3917	15.5603	15.5715	15.5078	15.5219	15.6781	15.626	15.6086	1.07239	0.248659
sll1226	sll1226	15	15	15	sll1226 hydrogenase subunit of the bidirectional hydrogenase		1	15	15	15	33.8	33.8	33.8	52.917	474	16.9347	16.935	16.8898	16.9198	16.7407	16.7597	16.7944	16.7649	0.898199	0.00207079
sll1228	sll1228	7	7	7	sll1228 two-component hybrid sensor and regulator		1	7	7	7	14.2	14.2	14.2	69.896	633	14.6877	14.7514	14.8102	14.7498	14.7163	14.7269	14.7278	14.7237	0.982085	0.538449
sll1229	sll1229	10	10	10	sll1229 two-component hybrid sensor and regulator		1	10	10	10	27	27	27	42.382	378	16.5097	16.5084	16.7688	16.5956	16.5503	16.5558	16.6024	16.5695	0.982054	0.793231
sll1231	sll1231	2	2	2	sll1231 mannosyltransferase		1	2	2	2	5.3	5.3	5.3	45.659	399	14.17	14.1746	14.1803	14.175	14.1768	14.3147	14.4193	14.3036	1.09326	0.208267
sll1233	sll1233	7	7	7	sll1233 hypothetical protein		1	7	7	7	31.3	31.3	31.3	33.204	294	15.6482	15.6442	15.7711	15.6878	15.5803	15.5418	15.5503	15.5575	0.913616	0.0793097
sll1234	sll1234	13	13	13	sll1234 adenosylhomocysteinase		1	13	13	13	45.9	45.9	45.9	46.213	425	19.0845	19.1073	19.1337	19.1085	19.2507	19.2407	19.2829	19.2581	1.10924	0.00150006
sll1236	sll1236	2	2	2	sll1236 unknown protein		1	2	2	2	28.3	28.3	28.3	14.711	127	14.7437	14.367	14.665	14.5919	14.4343	14.4479	14.4123	14.4315	0.894761	0.296527
sll1237	sll1237	5	5	5	sll1237 N(5)-glutamine methyltransferase		1	5	5	5	16.1	16.1	16.1	33.802	299	16.5067	16.4819	16.4606	16.483	16.3693	16.3506	16.3034	16.3411	0.906299	0.00581405
sll1239	sll1239	9	9	9	sll1239 unknown protein		1	9	9	9	31.5	31.5	31.5	20.608	178	17.8812	17.8375	17.8737	17.8641	18.0372	17.952	17.9033	17.9642	1.07182	0.112832
sll1241	sll1241	14	14	14	sll1241 unknown protein		1	14	14	14	48.4	48.4	48.4	29.409	252	17.2485	17.2163	17.2382	17.2343	17.098	17.1388	17.0952	17.1107	0.917858	0.00312198
sll1242	sll1242	13	13	13	sll1242 hypothetical protein		1	13	13	13	24.1	24.1	24.1	61.755	536	17.0727	17.0635	17.1519	17.096	17.1065	17.1257	17.2574	17.1632	1.04765	0.304114
sll1244	sll1244	7	7	7	sll1244 50S ribosomal protein L9		1	7	7	7	64.5	64.5	64.5	16.641	152	18.5546	18.4997	18.5706	18.5416	18.5998	18.5143	18.4884	18.5341	0.994826	0.862012
sll1247	sll1247	11	11	11	sll1247 hypothetical protein		1	11	11	11	25.4	25.4	25.4	52.741	457	17.1504	17.1843	17.1723	17.169	17.4498	17.417	17.3725	17.4131	1.18439	0.00304031
sll1249	sll1249	15	15	15	sll1249 pantothenate synthetase/cytidylate kinase		1	15	15	15	30.2	30.2	30.2	55.451	513	16.5884	16.5797	16.6187	16.5956	16.6776	16.5899	16.668	16.6452	1.03496	0.209037
sll1252	sll1252	5	5	5	sll1252 hypothetical protein		1	5	5	5	22.4	22.4	22.4	28.591	259	16.3622	16.3597	16.3262	16.3494	16.3998	16.3816	16.3396	16.3737	1.01698	0.326393
sll1253	sll1253	7	7	7	sll1253 similar to polyA polymerase		1	7	7	7	7.9	7.9	7.9	105.91	942	15.1898	15.2346	15.2363	15.2202	15.1467	15.2229	15.2099	15.1932	0.98142	0.397567
sll1254	sll1254	3	3	3	sll1254 hypothetical protein		1	3	3	3	5.8	5.8	5.8	38.343	346	16.5438	16.6064	16.7737	16.6413	16.7331	16.769	16.7741	16.7588	1.08481	0.226328
sll1258	sll1258	5	5	5	sll1258 dCTP deaminase		1	5	5	5	36.3	36.3	36.3	21.378	193	15.7123	15.632	15.9044	15.7496	15.7099	15.6072	15.6587	15.6586	0.938895	0.380929
sll1260	sll1260	13	13	13	sll1260 30S ribosomal protein S2		1	13	13	13	49.4	49.4	49.4	30.15	269	18.3633	18.4125	18.3421	18.3726	18.3058	18.2971	18.2404	18.2811	0.938531	0.0352581
sll1261	sll1261	15	15	15	sll1261 elongation factor TS		1	15	15	15	64.2	64.2	64.2	24.231	218	18.6189	18.6333	18.6772	18.6431	18.5233	18.5351	18.5662	18.5415	0.932003	0.0116798
sll1262	sll1262	6	6	6	sll1262 hypothetical protein		1	6	6	6	61.5	61.5	61.5	17.629	161	16.1872	16.1424	16.0565	16.1287	16.175	16.1817	16.1557	16.1708	1.02958	0.387306
sll1265	sll1265	3	3	3	sll1265 unknown protein		1	3	3	3	1.4	1.4	1.4	213.76	1978	13.6243	13.7519	13.8157	13.7306	13.8573	13.9473	13.8821	13.8956	1.12113	0.0811067
sll1268	sll1268	7	7	7	sll1268 unknown protein		1	7	7	7	14.7	14.7	14.7	53.82	517	16.3062	16.2564	16.294	16.2855	16.2091	16.2117	16.1752	16.1987	0.941576	0.0117516
sll1270	sll1270	8	8	8	sll1270 periplasmic substrate-binding and integral membrane protein of the ABC-type Bgt permease for basic amino acids and glutamine BgtB		1	8	8	8	22.8	22.8	22.8	57.68	530	15.9013	15.9586	15.9958	15.9519	15.9633	15.9456	15.9097	15.9396	0.991489	0.721786
sll1272	sll1272	9	9	9	sll1272 unknown protein		1	9	9	9	35.2	35.2	35.2	29.008	256	15.9501	15.9449	15.8081	15.901	15.9466	15.8983	15.8508	15.8986	0.998303	0.966518
sll1273	sll1273	10	10	10	sll1273 unknown protein		1	10	10	10	30.6	30.6	30.6	53.975	474	16.346	16.3729	16.6787	16.4659	16.3852	16.4176	16.4876	16.4302	0.975549	0.774164
sll1274	sll1274	5	5	5	sll1274 hypothetical protein		1	5	5	5	29.8	29.8	29.8	20.265	171	13.7189	13.7397	13.5722	13.6769	13.3526	13.4756	13.604	13.4774	0.87082	0.0965791
sll1275	sll1275	18	18	18	sll1275 pyruvate kinase 2		1	18	18	18	41.6	41.6	41.6	62.985	591	18.4517	18.4245	18.4521	18.4428	18.3929	18.3289	18.3097	18.3439	0.933723	0.0459524
sll1276	sll1276	9	9	9	sll1276 ATP-binding protein of ABC transporter		1	9	9	9	19.5	19.5	19.5	59.009	534	15.8128	15.836	15.6653	15.7714	15.9606	15.7686	15.9489	15.8927	1.08771	0.214665
sll1277	sll1277	3	3	3	sll1277 RecF protein		1	3	3	3	6.5	6.5	6.5	43.743	384	13.0198	12.8905	12.8579	12.9227	13.0698	13.0375	13.0024	13.0366	1.08209	0.135008
sll1280	sll1280	9	9	9	sll1280 hypothetical protein		1	9	9	9	34.6	34.6	34.6	33.07	295	15.3706	15.4245	15.3576	15.3843	15.8852	15.893	15.9353	15.9045	1.43419	5.97276e-05
sll1282	sll1282	5	5	5	sll1282 riboflavin synthase beta subunit		1	5	5	5	32.3	32.3	32.3	17.617	164	16.973	16.9123	16.889	16.9248	16.8505	16.7773	16.8127	16.8135	0.925769	0.0286196
sll1283	sll1283	6	6	6	sll1283 similar to stage II sporulation protein D		1	6	6	6	23.3	23.3	23.3	42.134	391	15.2473	15.2683	15.4159	15.3105	15.0128	15.1083	15.0598	15.0603	0.84079	0.0247389
sll1285	sll1285	1	1	1	sll1285 hypothetical protein		1	1	1	1	2.2	2.2	2.2	35.288	313	13.3252	13.2167	13.4226	13.3215	13.4735	13.4024	13.2522	13.376	1.03852	0.570413
sll1286	sll1286	5	5	5	sll1286 transcriptional regulator		1	5	5	5	24.8	24.8	24.8	23.926	214	14.5914	14.6379	14.5993	14.6095	14.5369	14.5167	14.4811	14.5116	0.934363	0.0111428
sll1289	sll1289	6	6	6	sll1289 hypothetical protein		1	6	6	6	52.1	52.1	52.1	21.221	194	16.089	16.0961	16.068	16.0844	16.0993	16.0649	16.1646	16.1096	1.01764	0.483017
sll1290	sll1290	21	21	21	sll1290 probable ribonuclease II		1	21	21	21	27.3	27.3	27.3	75.801	666	17.8259	17.7822	17.9236	17.8439	17.8605	17.7768	17.8355	17.8243	0.986474	0.711294
sll1291	sll1291	6	6	6	sll1291 two-component response regulator PatA subfamily		1	6	6	6	17.2	17.2	17.2	44.66	401	15.9427	15.8728	16.0562	15.9572	15.7574	15.7538	15.7957	15.769	0.87765	0.0643121
sll1292	sll1292	6	6	6	sll1292 two-component response regulator CheY subfamily		1	6	6	6	52.9	52.9	52.9	13.685	121	17.0423	16.9977	17.0745	17.0381	17.2018	17.0198	17.1509	17.1242	1.06145	0.249474
sll1293	sll1293	3	3	3	sll1293 unknown protein		1	3	3	3	20	20	20	16.885	155	14.5008	14.461	14.7719	14.5779	13.9625	13.9787	13.9923	13.9778	0.659729	0.0247411
sll1294	sll1294	35	35	35	sll1294 methyl-accepting chemotaxis protein		1	35	35	35	44.9	44.9	44.9	103.18	953	18.6117	18.5827	18.4557	18.5501	18.102	18.2334	18.2086	18.1813	0.774466	0.00454732
sll1296	sll1296	15	15	15	sll1296 two-component hybrid sensor and regulator		1	15	15	15	17.4	17.4	17.4	101.71	924	17.583	17.5433	17.5347	17.5537	17.2151	17.1928	17.3109	17.2396	0.804367	0.0062174
sll1297	sll1297	2	2	2	sll1297 probable dioxygenase, Rieske iron-sulfur component		1	2	2	2	7.7	7.7	7.7	39.254	338	12.2739	12.3117	12.3589	12.3148	12.5309	12.5733	12.4622	12.5221	1.15453	0.00839205
sll1298	sll1298	6	6	6	sll1298 putative carboxymethylenebutenolidase		1	6	6	6	37.8	37.8	37.8	26.941	246	17.7153	17.733	17.697	17.7151	17.6511	17.7254	17.6598	17.6788	0.975131	0.258947
sll1299	sll1299	5	5	5	sll1299 acetate kinase		1	5	5	5	13.3	13.3	13.3	44.761	413	15.714	15.7481	15.7698	15.744	15.51	15.5794	15.5188	15.536	0.865789	0.00214956
sll1300	sll1300	5	5	5	sll1300 putative methyltransferase		1	5	5	5	37.9	37.9	37.9	24.416	211	14.0232	14.1448	13.9482	14.0387	13.8062	13.9505	13.956	13.9042	0.91099	0.150791
sll1304	sll1304	8	8	8	sll1304 unknown protein		1	8	8	8	26.5	26.5	26.5	32.848	287	17.418	17.4242	17.3495	17.3972	16.936	16.9826	17.1784	17.0323	0.776521	0.0295305
sll1305	sll1305	6	6	6	sll1305 probable hydrolase		1	6	6	6	19.7	19.7	19.7	32.885	295	17.9525	18.1734	17.8985	18.0081	16.1081	16.3251	16.2078	16.2137	0.288281	0.000117475
sll1306	sll1306	15	15	15	sll1306 periplasmic protein, function unknown		1	15	15	15	48.4	48.4	48.4	38.27	335	18.2456	18.2769	18.2142	18.2456	18.0597	18.0743	18.0778	18.0706	0.885798	0.00651124
sll1307	sll1307	7	7	7	sll1307 periplasmic protein, function unknown		1	7	7	7	58.9	58.9	58.9	17.849	175	16.0143	15.9723	15.9135	15.9667	15.8732	15.776	15.824	15.8244	0.906115	0.0247099
sll1308	sll1308	5	5	5	sll1308 probable oxidoreductase		1	5	5	5	22.6	22.6	22.6	25.861	248	13.7449	13.8225	13.6054	13.7243	13.7553	13.7298	13.7827	13.7559	1.02218	0.671547
sll1314	sll1314	11	11	11	sll1314 putative C4-dicarboxylase binding protein, periplasmic protein		1	11	11	11	39	39	39	41.164	369	17.264	17.2854	17.3007	17.2834	17.288	17.2642	17.2665	17.2729	0.99277	0.471955
sll1315	sll1315	5	5	5	sll1315 unknown protein		1	5	5	5	13.9	13.9	13.9	38.968	352	15.3456	15.2557	15.3226	15.308	15.3231	15.3088	15.1995	15.2771	0.978849	0.555103
sll1316	sll1316	8	8	8	sll1316 cytochrome b6-f complex iron-sulfur subunit (Rieske iron sulfur protein)		1	8	8	8	49.4	49.4	49.4	18.996	180	17.8541	17.9418	18.0345	17.9435	17.9345	17.9705	18.0531	17.986	1.02994	0.539954
sll1317	sll1317	8	8	8	sll1317 apocytochrome f, component of cytochrome b6/f complex		1	8	8	8	39	39	39	35.23	328	18.0357	17.9874	17.9278	17.9836	18.0872	18.0544	18.0273	18.0563	1.05166	0.131102
sll1318	sll1318	4	4	4	sll1318 hypothetical protein		1	4	4	4	19.8	19.8	19.8	24.946	222	14.7153	14.7789	14.7509	14.7484	14.7848	14.7653	14.681	14.7437	0.996753	0.906125
sll1322	sll1322	2	2	2	sll1322 ATP synthase A chain of CF(0)		1	2	2	2	5.6	5.6	5.6	27.46	248	14.3908	14.3422	14.2445	14.3258	14.5534	14.4919	14.5578	14.5344	1.15551	0.0237561
sll1323	sll1323	5	5	5	sll1323 ATP synthase subunit b of CF(0)		1	5	5	5	49	49	49	16.245	143	16.5652	16.5781	16.5361	16.5598	16.5737	16.6381	16.6043	16.6054	1.03209	0.121793
sll1324	sll1324	6	6	6	sll1324 ATP synthase B chain (subunit I) of CF(0)		1	6	6	6	26.3	26.3	26.3	19.804	179	16.746	16.7504	16.7607	16.7524	16.8132	16.7828	16.7989	16.7983	1.03233	0.0192842
sll1325	sll1325	7	7	7	sll1325 ATP synthase delta chain of CF(1)		1	7	7	7	48.1	48.1	48.1	20.093	185	18.4777	18.4562	18.535	18.4896	18.529	18.5345	18.5396	18.5344	1.03149	0.195714
sll1326	sll1326	23	23	23	sll1326 ATP synthase alpha chain		1	23	23	23	47.7	47.7	47.7	53.965	503	19.9789	19.9785	19.993	19.9835	20.0055	20.0298	20.0708	20.0354	1.03664	0.104569
sll1327	sll1327	9	9	9	sll1327 ATP synthase gamma chain		1	9	9	9	29.9	29.9	29.9	34.605	314	18.1968	18.1177	18.1542	18.1562	18.3256	18.1942	18.1847	18.2348	1.05601	0.221702
sll1329	sll1329	5	5	5	sll1329 inositol monophosphate family protein		1	5	5	5	15.7	15.7	15.7	31.555	287	16.5429	16.5907	16.7155	16.6164	16.5723	16.6582	16.632	16.6208	1.00311	0.942837
sll1330	sll1330	3	3	3	sll1330 two-component system response regulator OmpR subfamily		1	3	3	3	10.4	10.4	10.4	28.301	250	14.4748	14.4829	14.4644	14.474	14.1227	14.0688	13.9911	14.0609	0.750973	0.00751941
sll1333	sll1333	1	1	1	sll1333 unknown protein		1	1	1	1	3	3	3	25.687	235	10.9383	10.9354	10.4467	10.7735	11.2665	11.1304	10.9657	11.1209	1.27227	0.155723
sll1334	sll1334	3	3	3	sll1334 two-component sensor histidine kinase		1	3	3	3	7.1	7.1	7.1	56.72	509	15.4531	15.5011	15.601	15.5184	15.4167	15.5076	15.4967	15.4737	0.96948	0.446401
sll1336	sll1336	19	19	19	sll1336 hypothetical protein		1	19	19	19	27.2	27.2	27.2	78.327	705	18.0193	18.0169	18.0324	18.0229	17.8608	17.8528	17.8054	17.8397	0.880739	0.00568479
sll1338	sll1338	3	3	3	sll1338 unknown protein		1	3	3	3	39	39	39	20.183	187	14.1661	14.2063	14.23	14.2008	14.3276	14.3627	14.3126	14.3343	1.09695	0.0057695
sll1340	sll1340	1	1	1	sll1340 hypothetical protein		1	1	1	1	9	9	9	11.581	100				#DIV/0!				#DIV/0!	#DIV/0!	#DIV/0!
sll1341	sll1341	9	9	9	sll1341 bacterioferritin		1	9	9	9	78.2	78.2	78.2	18.331	156	17.9825	18.0292	17.9993	18.0037	17.8196	17.9198	17.893	17.8775	0.916241	0.035362
sll1342	sll1342	21	21	21	sll1342 NAD(P)-dependent glyceraldehyde-3-phosphate dehydrogenase		1	21	21	21	78.9	78.9	78.9	36.492	337	20.1211	20.1266	20.1339	20.1272	20.0339	20.0589	20.089	20.0606	0.954861	0.0464518
sll1343	sll1343	26	26	26	sll1343 aminopeptidase		1	26	26	26	33.1	33.1	33.1	97.979	869	18.5943	18.5335	18.597	18.5749	18.5819	18.4947	18.476	18.5175	0.960982	0.223921
sll1348	sll1348	1	1	1	sll1348 hypothetical protein		1	1	1	1	2.3	2.3	2.3	34.888	310	12.9749	13.0312	12.9473	12.9845	12.7595	12.7066	12.7158	12.7273	0.836741	0.00179969
sll1349	sll1349	4	4	4	sll1349 phosphoglycolate phosphatase		1	4	4	4	17.6	17.6	17.6	24.982	221	14.955	14.8927	14.8686	14.9055	14.9127	14.8142	14.9171	14.8813	0.983429	0.601131
sll1350	sll1350	6	6	6	sll1350 hypothetical protein		1	6	6	6	17.3	17.3	17.3	44.504	398	15.5786	15.513	15.6412	15.5776	15.9601	15.9358	15.9681	15.9547	1.2987	0.00653495
sll1354	sll1354	9	9	9	sll1354 single-strand-DNA-specific exonuclease RecJ		1	9	9	9	14.4	14.4	14.4	84.235	759	14.9787	14.9502	15.0889	15.006	15.0488	15.0136	15.0496	15.0374	1.022	0.540068
sll1355	sll1355	1	1	1	sll1355 hypothetical protein		1	1	1	1	7.2	7.2	7.2	20.737	181				#DIV/0!				#DIV/0!	#DIV/0!	#DIV/0!
sll1356	sll1356	29	27	27	sll1356 glycogen phosphorylase		1	29	27	27	38.9	37	37	96.648	849	18.6423	18.5845	18.5487	18.5919	18.6352	18.5804	18.5531	18.5896	0.998407	0.952705
sll1358	sll1358	9	9	9	sll1358 putative oxalate decarboxylase, periplasmic protein		1	9	9	9	30.7	30.7	30.7	43.15	394	16.7943	16.7824	16.7749	16.7839	16.907	16.8463	16.7924	16.8486	1.04587	0.186647
sll1359	sll1359	4	4	4	sll1359 unknown protein		1	4	4	4	6.9	6.9	6.9	75.516	678	14.1966	14.2762	14.2544	14.2424	14.1262	14.1843	14.1218	14.1441	0.934117	0.0355205
sll1360	sll1360	6	6	6	sll1360 DNA polymerase III subunit gamma/tau [Contains: Ssp dnaX intein]		1	6	6	6	6.4	6.4	6.4	122.01	1116	16.4696	16.4651	16.5125	16.4824	16.4054	16.4414	16.688	16.5116	1.02042	0.775364
sll1362	sll1362	28	28	28	sll1362 isoleucyl-tRNA synthetase		1	28	28	28	33.2	33.2	33.2	112.34	988	18.3062	18.311	18.3426	18.3199	18.3047	18.305	18.2972	18.3023	0.987849	0.259765
sll1363	sll1363	16	16	16	sll1363 ketol-acid reductoisomerase		1	16	16	16	46.9	46.9	46.9	39.951	367	19.2056	19.1739	19.1907	19.1901	19.2786	19.2639	19.2359	19.2595	1.0493	0.0134304
sll1365	sll1365	11	11	11	sll1365 unknown protein		1	11	11	11	15.5	15.5	15.5	70.335	633	16.2094	16.2143	16.2867	16.2368	16.2492	16.2979	16.297	16.2813	1.03134	0.220358
sll1366	sll1366	14	14	14	sll1366 putative SNF2 helicase		1	14	14	14	14.1	14.1	14.1	115.83	1039	16.7129	16.67	16.7458	16.7096	16.642	16.6786	16.6441	16.6549	0.962798	0.113685
sll1367	sll1367	9	9	9	sll1367 hypothetical protein		1	9	9	9	31.4	31.4	31.4	30.065	261	16.9285	16.9253	16.9332	16.929	16.984	16.9345	16.9066	16.9417	1.00883	0.632352
sll1369	sll1369	7	7	7	sll1369 putative peptidase		1	7	7	7	16	16	16	46.446	430	15.7484	15.7235	15.7268	15.7329	15.9343	15.9302	15.9845	15.9496	1.16208	0.00212216
sll1370	sll1370	11	11	11	sll1370 mannose-1-phosphate guanylyltransferase		1	11	11	11	29.4	29.4	29.4	40.464	367	17.138	17.1213	17.0971	17.1188	17.1221	17.0776	17.077	17.0922	0.98174	0.239166
sll1371	sll1371	5	5	5	sll1371 cAMP receptor protein, essential for motility		1	5	5	5	24.6	24.6	24.6	26.099	232	14.7049	14.7904	14.8131	14.7695	14.6629	14.7005	14.6727	14.6787	0.938993	0.0978254
sll1372	sll1372	1	1	1	sll1372 hypothetical protein		1	1	1	1	4	4	4	30.97	275	12.0512	12.0192	12.2312	12.1005	12.1256	12.129	12.1541	12.1362	1.02506	0.643887
sll1374	sll1374	3	3	3	sll1374 probable sugar transporter		1	3	3	3	6.4	6.4	6.4	60.064	544	14.3814	14.3319	14.2039	14.3057	14.388	14.033	14.1499	14.1903	0.923101	0.397736
sll1376	sll1376	3	3	3	sll1376 hypothetical protein		1	3	3	3	12	12	12	45.955	410	14.3157	14.3384	14.3266	14.3269	14.2759	14.318	14.2858	14.2932	0.97694	0.0999756
sll1377	sll1377	7	7	6	sll1377 probable glycosyltransferase		1	7	7	6	15.2	15.2	13.8	54.134	479	16.9978	17.0071	17.157	17.054	17.0944	17.1315	17.1116	17.1125	1.04141	0.374284
sll1378	sll1378	6	6	6	sll1378 periplasmic protein, function unknown		1	6	6	6	20.3	20.3	20.3	33.916	300	15.6802	15.7598	15.6982	15.7127	16.5956	16.5558	16.5756	16.5756	1.81874	9.24473e-05
sll1380	sll1380	9	9	9	sll1380 periplasmic protein, function unknown		1	9	9	9	53.7	53.7	53.7	23.884	214	17.5551	17.6024	17.4528	17.5368	17.5386	17.5331	17.5251	17.5322	0.996885	0.928221
sll1381	sll1381	4	4	4	sll1381 hypothetical protein		1	4	4	4	27.7	27.7	27.7	15.662	137	15.5454	15.4924	15.3833	15.4737	15.5478	15.462	15.4231	15.4776	1.00274	0.951174
sll1382	sll1382	4	4	4	sll1382 ferredoxin, petF-like protein		1	4	4	4	47.5	47.5	47.5	13.838	122	15.4906	15.4764	15.4257	15.4642	15.5522	15.4815	15.3816	15.4718	1.00522	0.898034
sll1383	sll1383	7	7	7	sll1383 probable myo-inositol-1(or 4)-monophosphatase		1	7	7	7	27.9	27.9	27.9	31.296	287	15.1991	15.1767	15.0888	15.1549	15.4297	15.3329	15.3401	15.3676	1.1589	0.00988777
sll1384	sll1384	13	13	13	sll1384 similar to DnaJ protein		1	13	13	13	45.2	45.2	45.2	34.545	314	17.1744	17.1032	17.1327	17.1368	16.9715	16.9789	16.973	16.9745	0.893608	0.0149259
sll1386	sll1386	1	1	1	sll1386 hypothetical protein		1	1	1	1	7.6	7.6	7.6	19.427	171	12.7755	12.8819	13.0884	12.9153	12.8528	13.0801	13.1151	13.016	1.07233	0.460141
sll1387	sll1387	3	3	3	sll1387 serine/threonine protein phosphatase PppA		1	3	3	3	16.1	16.1	16.1	28.912	254	15.5274	15.5125	15.5119	15.5172	15.4291	15.4683	15.4163	15.4379	0.946474	0.0274589
sll1388	sll1388	4	4	4	sll1388 hypothetical protein		1	4	4	4	26.6	26.6	26.6	17.292	154	15.688	15.6653	15.833	15.7288	15.4456	15.5465	15.5682	15.5201	0.865313	0.0368763
sll1390	sll1390	7	7	7	sll1390 hypothetical protein		1	7	7	7	28.9	28.9	28.9	27.394	249	16.846	16.9071	16.8953	16.8828	17.0532	17.0193	16.99	17.0208	1.10035	0.00618738
sll1392	sll1392	1	1	1	sll1392 transcriptional regulator		1	1	1	1	7.9	7.9	7.9	22.589	203	10.1147	9.96038	9.92111	9.99873	10.1314	9.85558	9.99897	9.99532	0.997641	0.974373
sll1393	sll1393	16	16	16	sll1393 glycogen (starch) synthase		1	16	16	16	34.6	34.6	34.6	56.224	491	18.8507	18.816	18.7456	18.8041	18.8674	18.8537	18.8422	18.8544	1.03548	0.24183
sll1394	sll1394	8	8	8	sll1394 peptide methionine sulfoxide reductase		1	8	8	8	44.1	44.1	44.1	24.209	222	16.4585	16.488	16.5443	16.4969	16.4841	16.4611	16.4894	16.4782	0.987113	0.542462
sll1395	sll1395	7	7	7	sll1395 dTDP-6-deoxy-L-mannose-dehydrogenase		1	7	7	7	39.3	39.3	39.3	30.249	280	15.0445	15.1025	15.0712	15.0727	14.9408	15.059	15.0419	15.0139	0.960025	0.24865
sll1396	sll1396	2	2	2	sll1396 unknown protein		1	2	2	2	8.9	8.9	8.9	25.791	224	11.694	11.8575	11.9326	11.828	11.4566	11.6842	11.6774	11.6061	0.857402	0.0970437
sll1398	sll1398	8	8	8	sll1398 photosystem II reaction center 13 kDa protein		1	8	8	8	74.1	74.1	74.1	12.59	112	17.6741	17.6772	17.6621	17.6712	17.7719	17.7448	17.7553	17.7573	1.06155	0.00187557
sll1399	sll1399	7	7	7	sll1399 hypothetical protein		1	7	7	7	18.7	18.7	18.7	46.195	401	14.6084	14.5897	14.7375	14.6452	14.6471	14.5766	14.6323	14.6187	0.981781	0.642209
sll1400	sll1400	3	3	3	sll1400 hypothetical protein		1	3	3	3	38.1	38.1	38.1	12.991	113	12.6145	12.6255	12.7824	12.6741	12.9013	12.7651	12.8494	12.8386	1.12076	0.0763929
sll1406	sll1406	1	1	1	sll1406 ferrichrome-iron receptor		1	1	1	1	1.1	1.1	1.1	91.42	828	10.2604	10.4052	10.403	10.3562	10.7934	10.6955	10.8642	10.7843	1.34551	0.00334137
sll1414	sll1414	1	1	1	sll1414 hypothetical protein		1	1	1	1	2.9	2.9	2.9	27.074	240	13.5839	13.6811	13.4708	13.5786	13.6352	13.6026	13.608	13.6153	1.02577	0.608751
sll1415	sll1415	4	4	4	sll1415 hypothetical protein		1	4	4	4	14.7	14.7	14.7	33.775	307	13.9902	13.9557	14.07	14.0053	14.0703	14.0289	14.0377	14.0456	1.02836	0.358633
sll1418	sll1418	10	10	10	sll1418 photosystem II oxygen-evolving complex 23K protein PsbP homolog		1	10	10	10	55.3	55.3	55.3	20.747	188	17.4785	17.6633	17.513	17.5516	17.5611	17.6273	17.6347	17.6077	1.03965	0.43572
sll1423	sll1423	11	11	11	sll1423 global nitrogen regulator		1	11	11	11	55.1	55.1	55.1	25.046	225	16.4145	16.4558	16.4	16.4234	16.3921	16.403	16.4267	16.4073	0.98886	0.464647
sll1424	sll1424	9	9	9	sll1424 hypothetical protein		1	9	9	9	20.6	20.6	20.6	55.645	491	15.2769	15.4333	15.2174	15.3092	15.2173	15.2044	15.1717	15.1978	0.925661	0.222193
sll1425	sll1425	21	21	21	sll1425 proline-tRNA ligase		1	21	21	21	40.3	40.3	40.3	66.929	603	18.4909	18.4808	18.4238	18.4652	18.3252	18.3575	18.3551	18.346	0.920695	0.0153491
sll1426	sll1426	2	2	2	sll1426 unknown protein		1	2	2	2	22.6	22.6	22.6	16.768	155	13.2177	13.1514	13.1992	13.1895	13.099	13.1046	13.0556	13.0864	0.931042	0.0165203
sll1427	sll1427	8	8	8	sll1427 protease		1	8	8	8	28.1	28.1	28.1	43.196	416	16.3065	16.3641	16.5491	16.4066	16.2537	16.3516	16.35	16.3184	0.940727	0.357508
sll1428	sll1428	1	1	1	sll1428 probable sodium-dependent transporter		1	1	1	1	2.4	2.4	2.4	31.227	292	13.986	14.0225	14.077	14.0285	14.02	13.9955	14.0742	14.0299	1.00094	0.971245
sll1429	sll1429	12	12	12	sll1429 unknown protein		1	12	12	12	40.8	40.8	40.8	35.944	304	16.7651	16.7775	16.8645	16.8024	17.0921	17.0383	17.0508	17.0604	1.19584	0.00521592
sll1430	sll1430	8	8	8	sll1430 adenine phosphoribosyltransferase		1	8	8	8	57.6	57.6	57.6	18.997	172	17.6794	17.5871	17.6729	17.6465	17.6333	17.6155	17.642	17.6303	0.988858	0.646058
sll1432	sll1432	2	2	2	sll1432 putative hydrogenase expression/formation protein HypB		1	2	2	2	9.8	9.8	9.8	31.243	285	15.594	15.6095	15.6378	15.6138	15.562	15.6596	15.6433	15.6216	1.00547	0.827348
sll1433	sll1433	8	8	8	sll1433 hypothetical protein		1	8	8	8	22.3	22.3	22.3	55.224	524	16.1076	16.0077	16.1345	16.0833	16.075	16.081	15.9966	16.0509	0.977766	0.533634
sll1434	sll1434	13	13	13	sll1434 penicillin-binding protein		1	13	13	13	21.5	21.5	21.5	70.274	650	16.5819	16.5854	16.5635	16.5769	16.5805	16.602	16.599	16.5938	1.01178	0.152429
sll1435	sll1435	20	20	20	sll1435 glutamyl-tRNA(Gln) amidotransferase subunit B		1	20	20	20	40.3	40.3	40.3	57.605	519	18.7452	18.7542	18.8372	18.7789	18.6172	18.6368	18.6034	18.6191	0.895196	0.0229582
sll1440	sll1440	5	5	5	sll1440 pyridoxamine 5-phosphate oxidase		1	5	5	5	21.7	21.7	21.7	26.404	230	14.9942	15.0154	14.9282	14.9793	15.0288	15.0977	15.043	15.0565	1.05501	0.0864664
sll1441	sll1441	1	1	1	sll1441 acyl-lipid desaturase (omega-3)		1	1	1	1	2.8	2.8	2.8	41.918	359	11.8543	11.8377	11.6812	11.7911	11.8558	11.9532	11.8402	11.8831	1.06587	0.244295
sll1443	sll1443	11	11	11	sll1443 CTP synthetase		1	11	11	11	24.7	24.7	24.7	60.807	546	16.609	16.5332	16.4483	16.5301	16.5244	16.4718	16.4106	16.4689	0.95846	0.348648
sll1444	sll1444	8	8	8	sll1444 3-isopropylmalate dehydratase small subunit		1	8	8	8	43.5	43.5	43.5	21.587	200	16.7788	16.8132	16.8017	16.7979	16.6129	16.7325	16.7818	16.7091	0.940281	0.215114
sll1446	sll1446	6	6	6	sll1446 hypothetical protein		1	6	6	6	25	25	25	34.759	320	15.2261	15.2734	15.2762	15.2586	15.1875	15.2355	15.2448	15.2226	0.975377	0.209946
sll1447	sll1447	1	1	1	sll1447 hypothetical protein		1	1	1	1	8.7	8.7	8.7	13.929	126	14.7148	14.6339	14.7027	14.6838	14.6065	14.6168	15.2258	14.8163	1.09621	0.584688
sll1450	sll1450	18	18	18	sll1450 nitrate/nitrite transport system substrate-binding protein		1	18	18	18	46.4	46.4	46.4	48.966	446	19.1779	19.1612	19.2298	19.1897	19.3968	19.3764	19.3714	19.3815	1.14225	0.00579363
sll1451	sll1451	1	1	1	sll1451 nitrate/nitrite transport system permease protein		1	1	1	1	3.6	3.6	3.6	29.72	275	13.105	13.1265	13.417	13.2162	13.1794	12.9832	12.9912	13.0512	0.891972	0.250777
sll1452	sll1452	21	21	19	sll1452 nitrate/nitrite transport system ATP-binding protein		1	21	21	19	32.8	32.8	30	75.1	670	18.562	18.5296	18.6109	18.5675	18.5425	18.5294	18.5375	18.5365	0.978721	0.319065
sll1453	sll1453	4	4	4	sll1453 nitrate/nitrite transport system ATP-binding protein		1	4	4	4	13	13	13	36.564	332	16.0647	16.0725	16.0251	16.0541	16.04	16.138	16.0591	16.079	1.01744	0.511148
sll1454	sll1454	16	16	16	sll1454 ferredoxin-nitrate reductase		1	16	16	16	21.7	21.7	21.7	79.631	714	17.1992	17.1669	17.2299	17.1987	17.1864	17.1247	17.126	17.1457	0.963941	0.125209
sll1455	sll1455	2	2	2	sll1455 hypothetical protein		1	2	2	2	9	9	9	17.753	155	13.7854	13.8441	13.7676	13.7991	13.7096	13.6054	13.6447	13.6532	0.903843	0.0213111
sll1456	sll1456	8	8	8	sll1456 unknown protein		1	8	8	8	31.8	31.8	31.8	33.517	302	16.5189	16.5311	16.4974	16.5158	16.4375	16.4205	16.3856	16.4145	0.932213	0.00799206
sll1457	sll1457	8	8	8	sll1457 probable glycosyltransferase		1	8	8	8	26.4	26.4	26.4	35.769	318	15.9767	15.9978	15.9628	15.9791	16.0063	15.9792	15.9821	15.9892	1.00704	0.490392
sll1459	sll1459	3	3	3	sll1459 stationary-phase survival protein SurE homolog		1	3	3	3	14.2	14.2	14.2	24.907	225	14.8756	14.7397	14.7001	14.7718	14.8292	14.8018	14.8132	14.8147	1.0302	0.505138
sll1461	sll1461	1	1	1	sll1461 hypothetical protein		1	1	1	1	5	5	5	25.524	220	11.8639	11.999	11.9664	11.9431	12.1638	12.2961	12.3197	12.2598	1.24552	0.00807958
sll1462	sll1462	5	5	5	sll1462 putative hydrogenase expression/formation protein HypE		1	5	5	5	19.1	19.1	19.1	36.425	345	16.3283	16.285	16.6214	16.4115	16.399	16.3704	16.4919	16.4204	1.00617	0.942691
sll1463	sll1463	33	33	32	sll1463 cell division protein FtsH		1	33	33	32	60	60	58.9	68.198	628	19.4056	19.3897	19.445	19.4134	19.4484	19.4077	19.4273	19.4278	1.01001	0.520139
sll1464	sll1464	8	8	8	sll1464 hypothetical protein		1	8	8	8	18.2	18.2	18.2	54.04	477	16.5418	16.5698	16.8547	16.6554	16.5483	16.5501	16.5705	16.5563	0.933578	0.425795
sll1466	sll1466	6	6	6	sll1466 probable glycosyltransferase		1	6	6	6	14.5	14.5	14.5	47.141	413	15.2829	15.2204	15.3091	15.2708	15.069	15.0618	15.1018	15.0775	0.874639	0.00823728
sll1470	sll1470	16	16	16	sll1470 3-isopropylmalate dehydratase large subunit		1	16	16	16	41.5	41.5	41.5	50.458	468	18.1492	18.1704	18.2103	18.1766	18.0933	18.1174	18.1225	18.1111	0.955577	0.0478905
sll1471	sll1471	13	13	13	sll1471 phycobilisome rod-core linker polypeptide		1	13	13	13	47.4	47.4	47.4	28.522	249	18.5635	18.5563	18.5026	18.5408	18.6309	18.595	18.5782	18.6014	1.04287	0.073191
sll1477	sll1477	6	6	6	sll1477 hypothetical protein		1	6	6	6	8.4	8.4	8.4	92.864	832	15.5118	15.7155	15.634	15.6204	15.5183	15.5624	15.5281	15.5363	0.943343	0.289147
sll1479	sll1479	8	8	8	sll1479 6-phosphogluconolactonase		1	8	8	8	33.8	33.8	33.8	26.482	240	16.2769	16.2915	16.1565	16.2416	16.1938	16.1503	16.1844	16.1762	0.95563	0.261994
sll1481	sll1481	22	22	22	sll1481 ABC-transporter membrane fusion protein		1	22	22	22	56.5	56.5	56.5	48.59	451	17.9744	18.0412	18.0592	18.0249	18.1032	18.1094	18.0588	18.0905	1.04647	0.110458
sll1482	sll1482	2	2	2	sll1482 ABC transporter permease protein		1	2	2	2	7.8	7.8	7.8	42.303	383	14.3367	14.2463	14.2838	14.289	14.2408	14.2247	14.1848	14.2167	0.951167	0.0925845
sll1483	sll1483	1	1	1	sll1483 periplasmic protein, similar to transforming growth factor induced protein		1	1	1	1	12.2	12.2	12.2	18.471	180	12.6448	12.6967	12.7038	12.6818	13.196	13.0474	12.9573	13.0669	1.30598	0.0247471
sll1484	sll1484	15	15	15	sll1484 type 2 NADH dehydrogenase		1	15	15	15	36.6	36.6	36.6	52.818	487	17.5715	17.6467	17.6917	17.6366	17.7252	17.7308	17.7283	17.7281	1.06547	0.12043
sll1486	sll1486	1	1	1	sll1486 hypothetical protein		1	1	1	1	7.6	7.6	7.6	23.083	210	9.86652	10.1295	9.87831	9.9581	9.90847	9.69926	10.1872	9.93163	0.981819	0.882092
sll1489	sll1489	3	3	3	sll1489 circadian phase modifier CpmA homolog		1	3	3	3	12.5	12.5	12.5	29.359	279	13.5707	13.6708	13.7805	13.674	13.882	13.9092	13.9187	13.9033	1.17226	0.0590167
sll1491	sll1491	5	5	5	sll1491 periplasmic WD-repeat protein		1	5	5	5	19.5	19.5	19.5	37.347	348	17.2695	17.3392	17.1831	17.2639	17.2587	17.3711	17.3673	17.3323	1.04856	0.307974
sll1495	sll1495	8	8	8	sll1495 hypothetical protein		1	8	8	8	17.6	17.6	17.6	43.543	397	16.7734	16.7405	16.7686	16.7608	16.8818	16.8873	16.8666	16.8786	1.08504	0.00150379
sll1496	sll1496	10	10	10	sll1496 mannose-1-phosphate guanyltransferase		1	10	10	10	13	13	13	92.502	843	16.0988	16.1475	16.0592	16.1019	16.1353	16.1662	16.1377	16.1464	1.03136	0.216427
sll1498	sll1498	2	2	2	sll1498 carbamoyl-phosphate synthase small chain		1	2	2	2	5.4	5.4	5.4	46.485	424	13.3954	13.3361	13.2554	13.329	13.3007	13.1769	13.0159	13.1645	0.892253	0.174114
sll1499	sll1499	46	45	45	sll1499 ferredoxin-dependent glutamate synthase		1	46	45	45	32.6	32	32	168.35	1546	19.256	19.2516	19.2593	19.2556	19.324	19.2994	19.2738	19.299	1.03057	0.0922749
sll1500	sll1500	1	1	1	sll1500 hypothetical protein		1	1	1	1	2.7	2.7	2.7	38.996	369	11.6118	11.5802	11.6805	11.6241	11.4787	11.6275	11.7061	11.6041	0.986186	0.802582
sll1501	sll1501	4	4	4	sll1501 cobyrinic acid a,c-diamide synthase		1	4	4	4	7.9	7.9	7.9	53.853	482	14.6723	14.835	14.8706	14.7927	14.8245	14.9057	14.8981	14.8761	1.05953	0.306261
sll1502	sll1502	47	47	46	sll1502 NADH-dependent glutamate synthase large subunit		1	47	47	46	44.1	44.1	43.5	169.07	1550	19.7212	19.7558	19.7808	19.7526	19.8155	19.8491	19.8514	19.8387	1.06149	0.0189415
sll1503	sll1503	1	1	1	sll1503 unknown protein		1	1	1	1	1.6	1.6	1.6	60.113	508	11.8186	11.754	11.8845	11.819	11.7671	11.8432	12.061	11.8904	1.05073	0.515316
sll1504	sll1504	2	2	2	sll1504 hypothetical protein		1	2	2	2	20.6	20.6	20.6	12.035	102	13.296	13.2572	13.9035	13.4856	13.3992	13.4211	13.4771	13.4325	0.963852	0.823901
sll1505	sll1505	2	2	2	sll1505 hypothetical protein		1	2	2	2	18	18	18	13.098	111	13.7073	13.6536	13.3373	13.566	13.7271	13.5152	13.5856	13.6093	1.03045	0.76269
sll1507	sll1507	1	1	1	sll1507 salt-induced periplasmic protein		1	1	1	1	5	5	5	20.152	181	13.6622	13.6463	13.7078	13.6721	13.2075	13.3397	13.3321	13.2931	0.768976	0.00557493
sll1508	sll1508	4	4	4	sll1508 UDP-3-0-acyl N-acetylglcosamine deacetylase		1	4	4	4	13.8	13.8	13.8	30.326	276	16.41	16.3366	16.3883	16.3783	16.4815	16.356	16.4075	16.415	1.02577	0.446046
sll1512	sll1512	2	2	2	sll1512 hypothetical protein		1	2	2	2	13.3	13.3	13.3	15.247	135	14.4047	14.4286	14.32	14.3844	14.2429	14.323	14.3287	14.2982	0.941982	0.117868
sll1513	sll1513	3	3	3	sll1513 c-type cytochrome synthesis protein		1	3	3	3	15.6	15.6	15.6	36.077	334	11.9751	11.7886	11.4056	11.7231	12.0947	12.0677	12.0038	12.0554	1.25899	0.183186
sll1514	sll1514	5	5	5	sll1514 16.6 kDa small heat shock protein, molecular chaperone		1	5	5	5	45.9	45.9	45.9	16.595	146	16.0588	16.1747	16.4362	16.2232	16.6667	16.6378	16.616	16.6401	1.33506	0.0624702
sll1515	sll1515	7	7	7	sll1515 glutamine synthetase inactivating factor IF17		1	7	7	7	56.4	56.4	56.4	16.68	149	17.104	17.0188	17.0454	17.0561	17.0478	17.2153	18.3661	17.5431	1.40154	0.360761
sll1516	sll1516	5	5	5	sll1516 hypothetical protein		1	5	5	5	10.6	10.6	10.6	70.942	624	14.149	14.2079	14.1034	14.1534	14.1218	14.1534	14.1572	14.1442	0.993594	0.795678
sll1520	sll1520	8	8	8	sll1520 DNA repair protein RecN		1	8	8	8	17.3	17.3	17.3	64.546	584	16.2677	16.2634	16.2532	16.2614	16.2915	16.2681	16.2209	16.2602	0.999127	0.957605
sll1521	sll1521	18	18	18	sll1521 flavoprotein		1	18	18	18	37.7	37.7	37.7	65.092	597	17.9696	17.9748	17.9417	17.9621	17.956	17.9846	17.9901	17.9769	1.01035	0.370987
sll1522	sll1522	3	3	3	sll1522 CDP-diacylglycerol--glycerol-3-phosphate 3-phosphatidyltransferase		1	3	3	3	10.1	10.1	10.1	19.708	179	14.9786	14.8957	15.2764	15.0502	15.1192	15.0512	15.2091	15.1265	1.05427	0.5889
sll1524	sll1524	4	4	4	sll1524 hypothetical protein		1	4	4	4	14	14	14	30.342	279	16.2721	16.2655	16.1094	16.2157	16.2753	16.1198	16.2357	16.2103	0.996243	0.942552
sll1525	sll1525	16	16	16	sll1525 phosphoribulokinase		1	16	16	16	60.2	60.2	60.2	37.914	332	19.5071	19.4688	19.4249	19.4669	19.4447	19.4211	19.4298	19.4319	0.976008	0.275304
sll1526	sll1526	11	11	11	sll1526 hypothetical protein		1	11	11	11	24.7	24.7	24.7	57.726	506	17.6626	17.7649	17.5523	17.6599	17.5247	17.7567	17.6565	17.646	0.990375	0.885597
sll1527	sll1527	8	8	8	sll1527 unknown protein		1	8	8	8	7.2	7.2	7.2	133.43	1168	15.0856	15.1648	15.2055	15.152	15.097	15.1495	15.3207	15.1891	1.02602	0.659747
sll1528	sll1528	25	25	25	sll1528 unknown protein		1	25	25	25	26	26	26	114.6	996	18.2029	18.1595	18.151	18.1711	18.1669	18.1322	18.176	18.1583	0.991183	0.574881
sll1530	sll1530	10	10	10	sll1530 unknown protein		1	10	10	10	27.5	27.5	27.5	43.745	386	17.6583	17.6632	17.6495	17.657	17.7469	17.6926	17.6777	17.7058	1.03436	0.142111
sll1531	sll1531	3	3	3	sll1531 unknown protein		1	3	3	3	4.9	4.9	4.9	70.187	608	16.7016	16.7273	16.9415	16.7901	16.8068	16.7932	16.772	16.7907	1.00038	0.994894
sll1532	sll1532	3	3	3	sll1532 hypothetical protein		1	3	3	3	22.7	22.7	22.7	23.26	211	14.9348	15.0288	14.9622	14.9753	14.8994	14.9163	14.9384	14.918	0.961107	0.166032
sll1533	sll1533	15	15	15	sll1533 twitching mobility protein		1	15	15	15	40.7	40.7	40.7	47.898	428	17.7629	17.7866	17.7413	17.7636	17.6427	17.6845	17.6841	17.6704	0.937483	0.00817696
sll1534	sll1534	3	3	3	sll1534 probable glycosyltransferase		1	3	3	3	7.9	7.9	7.9	42.884	378	15.1291	15.1198	15.1366	15.1285	15.1396	15.1094	15.0831	15.1107	0.987737	0.390924
sll1536	sll1536	13	13	13	sll1536 molybdopterin biosynthesis MoeB protein		1	13	13	13	45.7	45.7	45.7	42.759	392	18.2	18.23	18.1927	18.2075	17.8591	17.9656	17.9228	17.9158	0.816925	0.00571323
sll1537	sll1537	3	3	3	sll1537 similar to mutator MutT protein		1	3	3	3	21.6	21.6	21.6	15.937	139	15.1989	15.1646	15.2346	15.1994	14.9961	15.1317	15.1597	15.0959	0.930759	0.166241
sll1538	sll1538	4	4	4	sll1538 similar to beta-hexosaminidase a precursor		1	4	4	4	10	10	10	58.237	538	14.9428	15.0078	15.0625	15.0043	14.8684	14.9598	15.0692	14.9658	0.973649	0.605435
sll1540	sll1540	1	1	1	sll1540 dolichyl-phosphate-mannose synthase		1	1	1	1	3.1	3.1	3.1	43.946	390	12.0762	12.0502	12.4043	12.1769	11.7446	11.881	11.9491	11.8582	0.801794	0.0888364
sll1541	sll1541	9	9	9	sll1541 hypothetical protein		1	9	9	9	23.3	23.3	23.3	54.286	490	15.7964	15.7964	15.7185	15.7704	15.7723	15.7304	15.7254	15.7427	0.980959	0.418595
sll1542	sll1542	5	5	5	sll1542 hypothetical protein		1	5	5	5	18.7	18.7	18.7	34.814	300	15.0216	15.0508	15.0523	15.0416	14.9645	15.0415	14.9507	14.9856	0.961938	0.177069
sll1545	sll1545	7	7	7	sll1545 glutathione S-transferase		1	7	7	7	30.6	30.6	30.6	29.765	271	16.9995	16.9719	17.1741	17.0485	17.0329	16.9922	17.01	17.0117	0.974797	0.621886
sll1546	sll1546	14	14	14	sll1546 exopolyphosphatase		1	14	14	14	30	30	30	60.885	540	17.6544	17.647	17.5505	17.6173	17.7754	17.7453	17.7073	17.7427	1.09079	0.0433212
sll1547	sll1547	3	3	3	sll1547 hypothetical protein		1	3	3	3	21.7	21.7	21.7	16.944	152	15.3622	15.4349	15.4657	15.4209	15.3643	15.4397	15.4759	15.4266	1.00394	0.905628
sll1549	sll1549	6	6	6	sll1549 salt-enhanced periplasmic protein		1	6	6	6	21.8	21.8	21.8	26.624	238	17.0878	17.102	17.1542	17.1147	17.0308	17.1116	17.0828	17.0751	0.972929	0.273185
sll1550	sll1550	8	5	5	sll1550 probable porin; major outer membrane protein		1	8	5	5	16.7	9.6	9.6	58.631	544	14.6994	14.6659	14.6043	14.6565	14.8949	14.9101	14.8925	14.8992	1.18316	0.0106467
sll1552	sll1552	10	10	10	sll1552 unknown protein		1	10	10	10	33	33	33	33.941	300	17.2392	17.1319	17.2773	17.2161	16.1031	16.1222	16.0298	16.0851	0.456577	8.49808e-05
sll1553	sll1553	21	21	21	sll1553 phenylalanyl-tRNA synthetase		1	21	21	21	31.6	31.6	31.6	87.887	810	19.069	19.0599	19.0628	19.0639	18.9364	18.9677	18.9446	18.9496	0.923811	0.00400839
sll1555	sll1555	7	7	7	sll1555 two-component hybrid sensor and regulator		1	7	7	7	19.8	19.8	19.8	41.472	368	17.3076	17.255	17.2261	17.2629	17.2164	17.2056	17.1217	17.1812	0.944975	0.103228
sll1556	sll1556	5	5	5	sll1556 isopentenyl-dephosphate delta-isomerase		1	5	5	5	17.5	17.5	17.5	37.541	349	15.4407	15.4304	15.4974	15.4562	15.4833	15.513	15.4557	15.484	1.01949	0.356944
sll1557	sll1557	1	1	1	sll1557 succinyl-CoA synthetase alpha chain		1	1	1	1	3.6	3.6	3.6	32.252	302	12.5375	12.4673	12.4305	12.4784	12.4865	12.4048	12.3699	12.4204	0.960592	0.282511
sll1558	sll1558	6	6	6	sll1558 mannose-1-phosphate guanyltransferase		1	6	6	6	16	16	16	42.768	388	15.3978	15.3275	15.4203	15.3819	15.3522	15.3672	15.2151	15.3115	0.952396	0.291803
sll1559	sll1559	13	13	13	sll1559 soluble hydrogenase 42 kD subunit		1	13	13	13	41.4	41.4	41.4	40.768	384	18.9604	18.9652	19.0632	18.9963	18.9784	18.9752	18.9677	18.9737	0.98451	0.571066
sll1561	sll1561	32	32	32	sll1561 proline oxidase		1	32	32	32	43	43	43	110.03	990	19.2718	19.2217	19.2157	19.2364	19.1025	19.1697	19.1189	19.1304	0.929151	0.0176013
sll1563	sll1563	20	20	20	sll1563 unknown protein		1	20	20	20	22.9	22.9	22.9	107.19	939	17.5637	17.5259	17.6514	17.5803	17.5875	17.5897	17.6077	17.5949	1.01016	0.734357
sll1564	sll1564	5	5	5	sll1564 putative lyase		1	5	5	5	9.7	9.7	9.7	59.819	547	13.8677	13.8572	13.8948	13.8732	13.978	14.0381	14.0284	14.0148	1.10313	0.00556271
sll1566	sll1566	15	15	15	sll1566 glucosylglycerolphosphate synthase		1	15	15	15	30.1	30.1	30.1	56.801	499	18.4768	18.4479	18.4698	18.4648	18.5651	18.5545	18.5349	18.5515	1.06188	0.00221734
sll1568	sll1568	8	8	8	sll1568 fibrillin		1	8	8	8	32.7	32.7	32.7	22.728	202	16.2361	16.214	16.181	16.2103	16.133	16.1321	16.1333	16.1328	0.947672	0.0400517
sll1570	sll1570	2	2	2	sll1570 unknown protein		1	2	2	2	9.9	9.9	9.9	26.62	243	13.4825	13.5826	13.5683	13.5445	13.6744	13.4407	13.4179	13.511	0.977077	0.732188
sll1571	sll1571	4	4	4	sll1571 hypothetical protein		1	4	4	4	15.3	15.3	15.3	34.534	313	14.156	14.2313	13.9402	14.1092	14.1485	14.1398	13.916	14.0681	0.97193	0.740905
sll1572	sll1572	1	1	1	sll1572 DNA polymerase III alpha subunit [Contains: Ssp dnaE intein]		1	1	1	1	3.9	3.9	3.9	51.395	458	13.4674	13.4865	13.6283	13.5274	13.2697	13.4318	13.3451	13.3489	0.883586	0.0613702
sll1573	sll1573	3	3	3	sll1573 hypothetical protein		1	3	3	3	19	19	19	17.143	147	15.0935	15.0586	15.1307	15.0943	15.1507	15.1872	15.1046	15.1475	1.03757	0.169742
sll1574	sll1574	2	2	2	sll1574 a part of spkA: serine/threonine protein kinase, regulates cellular motility ( disrupted by frameshift mutation)		1	2	2	2	17.5	17.5	17.5	11.797	103	13.9666	13.9828	13.7914	13.9136	13.9413	13.8922	13.909	13.9142	1.00039	0.993678
sll1575	sll1575	16	16	16	sll1575 a part of spkA: serine/threonine protein kinase, regulates cellular motility ( disrupted by frameshift mutation)		1	16	16	16	43.3	43.3	43.3	46.925	416	17.0479	16.9966	17.0932	17.0459	17.0186	17.0209	16.9759	17.0051	0.972153	0.285803
sll1577	sll1577	15	15	15	sll1577 phycocyanin beta subunit		1	15	15	15	92.4	92.4	92.4	18.126	172	23.0566	23.0572	23.0253	23.0464	23.0342	23.0709	23.0441	23.0497	1.00232	0.836381
sll1578	sll1578	13	13	13	sll1578 phycocyanin alpha subunit		1	13	13	13	92.6	92.6	92.6	17.586	162	23.4717	23.4353	23.2953	23.4008	23.4577	23.4425	23.367	23.4224	1.0151	0.745
sll1579	sll1579	15	15	15	sll1579 phycobilisome rod linker polypeptide		1	15	15	15	55.7	55.7	55.7	30.797	273	20.1027	20.1087	20.0583	20.0899	20.1197	20.1037	20.1212	20.1149	1.01746	0.2525
sll1580	sll1580	20	20	20	sll1580 phycobilisome rod linker polypeptide		1	20	20	20	63.9	63.9	63.9	32.52	291	20.8238	20.8238	20.8165	20.8214	20.8717	20.8218	20.8805	20.858	1.02572	0.181003
sll1581	sll1581	11	11	11	sll1581 hypothetical protein		1	11	11	11	29	29	29	54.125	504	16.8556	16.9279	16.8585	16.8807	17.0239	17.0732	17.0184	17.0385	1.11564	0.00729785
sll1582	sll1582	14	14	14	sll1582 unknown protein		1	14	14	14	14.3	14.3	14.3	129.02	1118	16.5229	16.4684	16.561	16.5174	16.4705	16.5169	16.4534	16.4802	0.974558	0.328018
sll1583	sll1583	29	29	29	sll1583 unknown protein		1	29	29	29	72.8	72.8	72.8	61.468	562	19.0672	19.0771	19.0922	19.0788	19.1083	19.0994	19.0632	19.0903	1.008	0.513847
sll1584	sll1584	5	5	5	sll1584 ferredoxin like protein		1	5	5	5	35.8	35.8	35.8	15.56	134	15.7344	15.7396	15.6372	15.7037	15.594	15.5598	15.5889	15.5809	0.918381	0.0550169
sll1586	sll1586	1	1	1	sll1586 unknown protein		1	1	1	1	0.6	0.6	0.6	190.2	1749				#DIV/0!				#DIV/0!	#DIV/0!	#DIV/0!
sll1590	sll1590	2	2	2	sll1590 two-component sensor histidine kinase		1	2	2	2	6.3	6.3	6.3	39.445	350	13.6745	13.9354	13.6357	13.7485	13.2285	13.1925	13.2021	13.2077	0.687388	0.0276518
sll1592	sll1592	1	1	1	sll1592 two-component response regulator NarL subfamily		1	1	1	1	4.4	4.4	4.4	24.418	226	13.6961	13.7485	13.7624	13.7357	13.7924	13.784	13.7569	13.7778	1.02962	0.16125
sll1594	sll1594	12	12	12	sll1594 ndhF3 operon transcriptional regulator, LysR family protein		1	12	12	12	40.5	40.5	40.5	35.696	316	17.4936	17.6564	17.8632	17.6711	17.7002	17.8592	17.8485	17.8027	1.09551	0.351345
sll1595	sll1595	8	8	8	sll1595 circadian clock protein KaiC homolog		1	8	8	8	14.4	14.4	14.4	63.996	568	15.0306	15.0817	15.0452	15.0525	15.2598	15.2211	15.2043	15.2284	1.12971	0.00144957
sll1596	sll1596	3	3	3	sll1596 circadian clock protein KaiB homolog		1	3	3	3	33.3	33.3	33.3	12.217	108	14.4843	14.5696	14.6033	14.5524	14.3144	14.4422	14.2921	14.3496	0.868831	0.0289489
sll1598	sll1598	5	5	5	sll1598 Mn transporter MntC		1	5	5	5	18.5	18.5	18.5	36.075	330	15.073	15.1174	15.245	15.1451	15.4987	15.4893	15.4987	15.4956	1.27496	0.0206485
sll1601	sll1601	2	2	2	sll1601 hypothetical protein		1	2	2	2	7.7	7.7	7.7	44.81	414	14.1041	14.2757	14.009	14.1296	14.1061	14.173	14.1603	14.1465	1.01173	0.852019
sll1605	sll1605	4	4	4	sll1605 (3R)-hydroxymyristol acyl carrier protein dehydrase		1	4	4	4	30.7	30.7	30.7	18.144	166	15.6957	15.628	15.7165	15.6801	15.7766	15.6851	15.6883	15.7167	1.02569	0.414472
sll1606	sll1606	1	1	1	sll1606 hypothetical protein		1	1	1	1	3.1	3.1	3.1	29.365	262	11.2997	11.3599	11.4126	11.3574	11.8795	11.6721	11.9018	11.8178	1.37592	0.0130159
sll1608	sll1608	10	10	10	sll1608 hypothetical protein		1	10	10	10	13.1	13.1	13.1	87.814	770	16.8465	16.8573	16.8769	16.8603	16.9029	16.9707	17.0132	16.9623	1.07328	0.0772282
sll1612	sll1612	9	9	9	sll1612 folylpolyglutamate synthase		1	9	9	9	22.7	22.7	22.7	47.4	428	16.1634	16.1401	16.2062	16.1699	16.172	16.1089	16.1829	16.1546	0.989447	0.638643
sll1613	sll1613	4	4	4	sll1613 unknown protein		1	4	4	4	31	31	31	15.816	145	13.9986	14.0641	13.8921	13.9849	14.1291	14.0278	14.081	14.0793	1.06755	0.196507
sll1614	sll1614	16	16	16	sll1614 cation-transporting P-type ATPase		1	16	16	16	22.1	22.1	22.1	97.589	905	17.3638	17.5363	17.2407	17.3803	17.2729	17.4232	17.1061	17.2674	0.924731	0.419168
sll1615	sll1615	5	5	5	sll1615 thiophen and furan oxidation protein		1	5	5	5	15.4	15.4	15.4	49.981	456	15.548	15.5324	15.6377	15.5727	15.5825	15.5597	15.6745	15.6056	1.02305	0.531222
sll1618	sll1618	4	4	4	sll1618 hypothetical protein		1	4	4	4	23.5	23.5	23.5	21.435	200	14.7614	14.7692	14.7523	14.761	15.0925	14.9319	14.9566	14.9937	1.17503	0.0419039
sll1620	sll1620	2	2	2	sll1620 hypothetical protein		1	2	2	2	12.7	12.7	12.7	17.177	158	12.268	12.5953	12.4376	12.4336	12.1839	12.3833	12.4733	12.3468	0.941596	0.533422
sll1621	sll1621	11	11	11	sll1621 AhpC/TSA family protein		1	11	11	11	39.7	39.7	39.7	21.167	189	19.3837	19.387	19.4129	19.3945	19.425	19.3964	19.3724	19.3979	1.00237	0.859023
sll1623	sll1623	2	2	2	sll1623 ABC transporter ATP-binding protein		1	2	2	2	9.4	9.4	9.4	24.332	223	14.9433	15.0036	15.0184	14.9884	14.9779	14.9367	14.9808	14.9651	0.983966	0.445498
sll1624	sll1624	6	6	6	sll1624 two-component response regulator		1	6	6	6	20.4	20.4	20.4	37.578	334	14.9095	15.0247	15.0043	14.9795	15.0798	15.1011	15.081	15.0873	1.07759	0.0884097
sll1625	sll1625	12	12	12	sll1625 succinate dehydrogenase iron- sulphur protein subunit		1	12	12	12	42.6	42.6	42.6	36.809	331	17.0414	17.0801	17.0126	17.0447	17.0459	17.0873	17.0816	17.0716	1.01884	0.323696
sll1626	sll1626	10	10	10	sll1626 LexA repressor		1	10	10	10	43.3	43.3	43.3	22.744	203	18.5319	18.5172	18.4998	18.5163	18.433	18.4056	18.3685	18.4024	0.924055	0.0127974
sll1628	sll1628	6	6	6	sll1628 hypothetical protein		1	6	6	6	15.9	15.9	15.9	43.103	384	15.8539	15.9702	15.9013	15.9084	15.9414	15.9602	15.9488	15.9502	1.02934	0.341535
sll1629	sll1629	6	6	6	sll1629 bacterial cryptochrome		1	6	6	6	15.5	15.5	15.5	52.919	453	15.9323	15.9172	16.2751	16.0415	16.0959	15.9433	16.0653	16.0348	0.995364	0.961303
sll1633	sll1633	11	11	11	sll1633 cell division protein FtsZ		1	11	11	11	29.5	29.5	29.5	44.773	430	18.4536	18.4251	18.4238	18.4342	18.4667	18.3738	18.3209	18.3871	0.967908	0.385071
sll1634	sll1634	4	4	4	sll1634 hypothetical protein		1	4	4	4	11.5	11.5	11.5	38.529	349	15.824	15.8044	15.8915	15.8399	15.66	15.6274	15.6349	15.6408	0.871046	0.00971155
sll1635	sll1635	6	6	6	sll1635 Thy1 protein homolog		1	6	6	6	26	26	26	25.066	215	15.6954	15.6702	15.6577	15.6745	15.5556	15.5202	15.5048	15.5269	0.902778	0.00194974
sll1636	sll1636	4	4	4	sll1636 ferripyochelin binding protein		1	4	4	4	25.8	25.8	25.8	19.547	190	14.6654	14.6476	14.6966	14.6699	14.7286	14.6849	14.7663	14.7266	1.04009	0.123206
sll1638	sll1638	3	3	3	sll1638 hypothetical protein		1	3	3	3	30.2	30.2	30.2	16.477	149	16.1943	16.2202	16.2247	16.2131	16.1312	16.1149	16.2384	16.1615	0.964887	0.313383
sll1639	sll1639	4	4	4	sll1639 urease accessory protein D		1	4	4	4	18.3	18.3	18.3	27.158	241	13.0931	13.2093	13.3218	13.2081	13.0754	13.2391	13.3234	13.2126	1.00314	0.965461
sll1640	sll1640	7	7	7	sll1640 hypothetical protein		1	7	7	7	23.1	23.1	23.1	35.589	321	15.5948	15.5529	15.7149	15.6208	15.5856	15.5504	15.5407	15.5589	0.95797	0.329485
sll1641	sll1641	13	13	13	sll1641 glutamate decarboxylase		1	13	13	13	30.2	30.2	30.2	53.041	467	17.6947	17.7045	17.735	17.7114	17.818	17.8016	17.7747	17.7981	1.06193	0.0077849
sll1643	sll1643	2	2	2	sll1643 hypothetical protein		1	2	2	2	9	9	9	21.652	188	15.7177	15.6508	15.7314	15.7	15.6728	15.6514	15.6841	15.6694	0.979051	0.347292
sll1647	sll1647	1	1	1	sll1647 probable phosphinothricin N-acetyltransferase		1	1	1	1	6.4	6.4	6.4	19.576	172	13.4651	13.3735	13.9069	13.5818	13.4529	13.4028	13.523	13.4596	0.918736	0.537627
sll1651	sll1651	6	6	6	sll1651 hypothetical protein		1	6	6	6	56.3	56.3	56.3	12.079	103	15.6935	15.6944	15.612	15.6666	15.7537	15.7022	15.7241	15.7267	1.04253	0.146313
sll1652	sll1652	3	3	3	sll1652 hypothetical protein		1	3	3	3	36.1	36.1	36.1	9.5237	83	15.3739	15.3879	15.2974	15.3531	15.1972	15.3092	15.2808	15.2624	0.939095	0.109662
sll1653	sll1653	4	4	4	sll1653 2-phytyl-1,4-benzoquinone methyltransferase		1	4	4	4	22.7	22.7	22.7	26.072	238	14.82	14.7759	14.7607	14.7855	14.7528	14.6212	14.6923	14.6887	0.935117	0.10954
sll1654	sll1654	4	4	4	sll1654 hypothetical protein		1	4	4	4	40.4	40.4	40.4	14.554	136	15.1941	15.1853	14.8589	15.0794	14.7611	14.8553	14.8238	14.8134	0.8316	0.130019
sll1655	sll1655	1	1	1	sll1655 similar to biotin [acetyl-CoA-carboxylase] ligase		1	1	1	1	2.9	2.9	2.9	29.734	274	12.0089	12.2142	12.1192	12.1141	11.9712	12.0269	12.0139	12.004	0.926518	0.198454
sll1656	sll1656	3	3	3	sll1656 hypothetical protein		1	3	3	3	16.8	16.8	16.8	20.493	191	14.1787	14.2659	14.2531	14.2326	14.2167	14.3286	14.1946	14.2467	1.00981	0.792619
sll1659	sll1659	3	3	3	sll1659 hypothetical protein		1	3	3	3	11.2	11.2	11.2	43.331	392	14.8433	14.7497	14.5277	14.7069	14.5496	14.7873	14.7883	14.7084	1.00104	0.990809
sll1660	sll1660	5	5	5	sll1660 hypothetical protein		1	5	5	5	25.8	25.8	25.8	21.939	194	16.0722	16.0743	16.1421	16.0962	16.0964	16.0758	16.0398	16.0707	0.982479	0.423036
sll1662	sll1662	5	5	5	sll1662 probable prephenate dehydratase		1	5	5	5	18.5	18.5	18.5	32.342	297	15.1662	15.1942	15.2079	15.1895	15.1638	15.1237	15.0803	15.1226	0.954729	0.0908191
sll1663	sll1663	10	10	10	sll1663 phycocyanin alpha phycocyanobilin lyase related protein		1	10	10	10	44.1	44.1	44.1	24.104	220	18.2953	18.3143	18.4069	18.3388	18.2232	18.2294	18.2244	18.2257	0.924563	0.081206
sll1664	sll1664	4	4	4	sll1664 probable glycosyl transferase		1	4	4	4	16	16	16	35.576	312	14.364	14.3488	14.4295	14.3808	14.3729	14.2893	14.4624	14.3749	0.995928	0.922784
sll1665	sll1665	6	6	6	sll1665 unknown protein		1	6	6	6	17.1	17.1	17.1	63.607	589	17.0334	17.0667	17.0165	17.0389	17.0196	17.0268	17.0197	17.022	0.988359	0.370448
sll1666	sll1666	2	2	2	sll1666 DnaJ-like protein		1	2	2	2	18.2	18.2	18.2	17.442	159	12.1806	12.1044	11.8893	12.0581	11.8459	12.0962	12.0581	12.0001	0.960565	0.645921
sll1667	sll1667	9	9	9	sll1667 periplasmic protein, similar to mitochondrial outer membrane 72K protein		1	9	9	9	49.6	49.6	49.6	29.889	266	16.3816	16.3117	16.3461	16.3464	16.5339	16.4098	16.4734	16.4724	1.09121	0.05143
sll1669	sll1669	4	4	4	sll1669 shikimate kinase		1	4	4	4	30.2	30.2	30.2	20.697	189	15.2485	15.2685	15.2227	15.2466	15.0842	15.2564	15.1602	15.1669	0.946297	0.247213
sll1672	sll1672	10	10	10	sll1672 two-component hybrid sensor and regulator		1	10	10	10	14.4	14.4	14.4	94.098	834	16.137	16.1642	16.1803	16.1605	16.0824	16.1704	16.1074	16.12	0.972338	0.261772
sll1673	sll1673	10	10	10	sll1673 two-component response regulator		1	10	10	10	23.7	23.7	23.7	51.309	452	17.1786	17.1657	17.2628	17.2024	17.1618	17.179	17.218	17.1862	0.988875	0.672665
sll1676	sll1676	8	8	8	sll1676 4-alpha-glucanotransferase		1	8	8	8	17	17	17	57.18	505	17.0095	17.0015	17.2113	17.0741	17.064	17.0396	17.0194	17.041	0.977326	0.679573
sll1677	sll1677	1	1	1	sll1677 similar to spore maturation protein B		1	1	1	1	5.9	5.9	5.9	21.219	203	13.132	13.2542	13.4386	13.2749	13.3134	13.2712	13.4352	13.3399	1.0461	0.566723
sll1678	sll1678	1	1	1	sll1678 similar to spore maturation protein A		1	1	1	1	7.7	7.7	7.7	19.548	182	10.9931	11.0711	10.9053	10.9898	11.2835	11.5007	11.3668	11.3837	1.3139	0.00923671
sll1679	sll1679	10	10	10	sll1679 periplasmic protease HhoA		1	10	10	10	27.7	27.7	27.7	41.336	394	16.7472	16.7852	16.799	16.7771	17.0955	17.1237	17.0302	17.0831	1.23629	0.00196102
sll1680	sll1680	8	8	8	sll1680 hypothetical protein		1	8	8	8	55.7	55.7	55.7	19.661	176	17.9638	17.9153	17.8498	17.9096	18.0065	17.9533	17.9368	17.9655	1.03952	0.238412
sll1681	sll1681	4	4	4	sll1681 unknown protein		1	4	4	4	7.9	7.9	7.9	56.177	507	15.1214	15.0975	15.1733	15.1307	15.2639	15.3199	15.3043	15.296	1.12141	0.00516989
sll1682	sll1682	9	9	9	sll1682 alanine dehydrogenase		1	9	9	9	25.3	25.3	25.3	38.267	360	16.5512	16.6197	16.6223	16.5977	16.6879	16.6287	16.6921	16.6695	1.05104	0.0825791
sll1683	sll1683	3	3	3	sll1683 lysine decarboxylase		1	3	3	3	5.8	5.8	5.8	51.84	483	13.4211	13.4584	13.4604	13.4466	13.4138	13.3495	13.3283	13.3639	0.944261	0.0652874
sll1687	sll1687	22	22	22	sll1687 unknown protein		1	22	22	22	23.1	23.1	23.1	109.82	970	17.6025	17.6183	17.7387	17.6532	17.6638	17.6504	17.6982	17.6708	1.0123	0.728674
sll1688	sll1688	13	13	13	sll1688 threonine synthase		1	13	13	13	37	37	37	47.014	433	17.241	17.2338	17.311	17.2619	17.2423	17.2527	17.2436	17.2462	0.989157	0.589401
sll1689	sll1689	2	2	2	sll1689 group2 RNA polymerase sigma factor SigE		1	2	2	2	4.6	4.6	4.6	42.362	369	11.5526	11.4098	11.4158	11.4594	11.6588	11.5388	11.5445	11.5807	1.08772	0.11902
sll1691	sll1691	4	4	4	sll1691 hypothetical protein		1	4	4	4	28	28	28	16.769	150	15.4415	15.381	15.3997	15.4074	15.3207	15.3451	15.3766	15.3475	0.959321	0.0684766
sll1692	sll1692	2	2	2	sll1692 hypothetical protein		1	2	2	2	14.5	14.5	14.5	17.258	145	14.773	14.7698	14.5956	14.7128	14.781	14.5928	14.6941	14.6893	0.983843	0.783438
sll1693	sll1693	10	10	10	sll1693 hypothetical protein		1	10	10	10	27.7	27.7	27.7	50.698	440	17.6679	17.5684	17.6334	17.6233	17.6271	17.5484	17.5466	17.574	0.966461	0.28077
sll1694	sll1694	6	6	6	sll1694 pilin polypeptide PilA1		1	6	6	6	40.5	40.5	40.5	17.573	168	17.9943	17.9832	17.9925	17.99	18.0852	18.0451	18.0919	18.0741	1.06	0.0238121
sll1695	sll1695	1	1	1	sll1695 pilin polypeptide PilA2		1	1	1	1	8.2	8.2	8.2	18.478	170	12.1101	12.1188	11.9329	12.0539	11.9721	11.9855	11.945	11.9675	0.941851	0.288049
sll1696	sll1696	10	10	10	sll1696 hypothetical protein		1	10	10	10	40.7	40.7	40.7	30.293	270	16.0799	15.9602	15.8833	15.9744	15.7707	15.9026	15.8437	15.839	0.91039	0.130505
sll1697	sll1697	1	1	1	sll1697 hypothetical protein		1	1	1	1	5.6	5.6	5.6	34.974	321	13.3714	13.1185	13.6376	13.3759	13.2354	13.134	13.2154	13.195	0.882145	0.350433
sll1698	sll1698	2	2	2	sll1698 hypothetical protein		1	2	2	2	14.3	14.3	14.3	14.22	126	13.1643	13.1903	13.2504	13.2017	13.4379	13.2464	13.4074	13.3639	1.119	0.0959545
sll1699	sll1699	13	13	13	sll1699 oligopeptide-binding protein of oligopeptide ABC transporter		1	13	13	13	20.6	20.6	20.6	70.686	631	16.3963	16.3676	16.5867	16.4502	16.5706	16.5254	16.6329	16.5763	1.09131	0.20037
sll1702	sll1702	2	2	2	sll1702 hypothetical protein YCF51		1	2	2	2	11.2	11.2	11.2	19.077	170	13.3451	13.3715	13.4065	13.3743	13.4732	13.3797	13.4138	13.4222	1.03376	0.22679
sll1703	sll1703	5	5	5	sll1703 protease IV		1	5	5	5	8.5	8.5	8.5	67.212	610	14.6478	14.5414	14.4968	14.562	14.6194	14.5141	14.4814	14.5383	0.983723	0.718402
sll1704	sll1704	3	3	3	sll1704 probable short chain dehydrogenase		1	3	3	3	11.3	11.3	11.3	28.443	256	15.7616	15.6006	16.0039	15.7887	15.6827	15.6364	15.764	15.6943	0.936681	0.51127
sll1708	sll1708	1	1	1	sll1708 two-component response regulator NarL subfamily		1	1	1	1	10.2	10.2	10.2	24.339	226	10.8325	10.8583	10.8115	10.8341	10.5937	10.6061	10.7818	10.6605	0.886653	0.097381
sll1709	sll1709	3	3	3	sll1709 3-ketoacyl-acyl carrier protein reductase		1	3	3	3	14.5	14.5	14.5	27.44	248	16.4917	16.439	16.4942	16.475	16.3917	16.4015	16.4626	16.4186	0.961693	0.122905
sll1712	sll1712	6	6	6	sll1712 DNA binding protein HU		1	6	6	6	32	32	32	10.891	100	18.935	19.0365	18.7438	18.9051	18.5611	18.8071	18.7576	18.7086	0.872676	0.161243
sll1714	sll1714	2	2	2	sll1714 unknown protein		1	2	2	2	19.5	19.5	19.5	15.201	133	12.0937	12.1596	12.1288	12.1274	12.1902	12.1876	12.0365	12.1381	1.00746	0.858135
sll1721	sll1721	11	11	11	sll1721 pyruvate dehydrogenase E1 component, beta subunit		1	11	11	11	39.2	39.2	39.2	35.709	324	17.7646	17.7646	17.744	17.7578	17.7548	17.7668	17.7527	17.7581	1.00026	0.966496
sll1730	sll1730	2	2	2	sll1730 unknown protein		1	2	2	2	10	10	10	24.115	210	15.7513	15.871	16.3037	15.9753	16.0249	16.0472	16.1433	16.0718	1.06915	0.62643
sll1733	sll1733	1	1	1	sll1733 NADH dehydrogenase subunit 4 (involved in low CO2-inducible, high affinity CO2 uptake)		1	1	1	1	2.6	2.6	2.6	54.346	502	12.775	12.7924	12.5847	12.7174	12.5495	12.4469	12.4948	12.4971	0.858399	0.0628008
sll1734	sll1734	10	10	10	sll1734 protein involved in low CO2-inducible, high affinity CO2 uptake		1	10	10	10	26.7	26.7	26.7	50.038	431	16.3644	16.3839	16.3096	16.3526	16.4749	16.3193	16.4173	16.4038	1.03611	0.388223
sll1735	sll1735	3	3	3	sll1735 hypothetical protein		1	3	3	3	32.3	32.3	32.3	14.105	133	15.6004	15.6033	15.6876	15.6304	15.6729	15.6423	15.787	15.7007	1.04994	0.262465
sll1736	sll1736	3	3	3	sll1736 hypothetical protein		1	3	3	3	32.3	32.3	32.3	13.773	127	14.1588	14.162	14.1868	14.1692	14.5175	14.3692	14.5192	14.4686	1.23063	0.0236009
sll1737	sll1737	2	2	2	sll1737 hypothetical protein YCF60		1	2	2	2	15.6	15.6	15.6	17.955	160	11.153	11.4569	11.4395	11.3498	11.1757	11.5697	11.4991	11.4148	1.04609	0.699571
sll1738	sll1738	4	4	4	sll1738 hypothetical protein		1	4	4	4	16.5	16.5	16.5	25.634	231	15.1595	15.1079	15.2268	15.1647	15.1374	15.1482	15.12	15.1352	0.979735	0.483824
sll1739	sll1739	8	8	8	sll1739 unknown protein		1	8	8	8	23.1	23.1	23.1	41.229	359	17.0384	17.0713	17.1542	17.088	17.1698	17.1551	17.1485	17.1578	1.04959	0.176231
sll1740	sll1740	5	5	5	sll1740 50S ribosomal protein L19		1	5	5	5	36.9	36.9	36.9	13.786	122	17.6046	17.6136	17.499	17.5724	17.5566	17.6381	17.6393	17.6113	1.02734	0.447687
sll1742	sll1742	11	11	11	sll1742 transcription antitermination protein NusG		1	11	11	11	63.9	63.9	63.9	23.416	205	17.9943	17.9683	18.013	17.9919	17.9076	17.8727	17.9168	17.899	0.937648	0.00764737
sll1743	sll1743	4	4	4	sll1743 50S ribosomal protein L11		1	4	4	4	39	39	39	14.977	141	15.4093	15.4526	15.6056	15.4891	15.4154	15.5053	15.4597	15.4601	0.980084	0.688049
sll1744	sll1744	13	13	13	sll1744 50S ribosomal protein L1		1	13	13	13	63.9	63.9	63.9	25.852	238	18.0232	18.076	18.0133	18.0375	18.1921	18.1197	18.1413	18.151	1.08188	0.0175258
sll1745	sll1745	7	7	7	sll1745 50S ribosomal protein L10		1	7	7	7	37.6	37.6	37.6	18.675	173	17.5467	17.6297	17.5827	17.5864	17.5346	17.6474	17.849	17.677	1.06484	0.430414
sll1746	sll1746	13	13	13	sll1746 50S ribosomal protein L12		1	13	13	13	81.2	81.2	81.2	13.259	128	19.8521	19.8977	19.9132	19.8877	19.9054	19.9438	19.9393	19.9295	1.02942	0.140542
sll1747	sll1747	18	18	18	sll1747 chorismate synthase		1	18	18	18	52.2	52.2	52.2	39.287	362	18.0326	18.0393	18.0965	18.0561	18.1219	18.0938	18.0946	18.1034	1.03334	0.130399
sll1750	sll1750	13	13	13	sll1750 urease alpha subunit		1	13	13	13	30.8	30.8	30.8	61.037	569	17.5683	17.5687	17.9341	17.6904	17.8301	17.8905	17.7871	17.8359	1.10614	0.354833
sll1752	sll1752	7	7	7	sll1752 hypothetical protein		1	7	7	7	30.4	30.4	30.4	26.376	240	16.0684	16.1059	16.183	16.1191	16.1539	16.1151	16.1061	16.125	1.00413	0.882681
sll1757	sll1757	7	7	7	sll1757 hypothetical protein		1	7	7	7	25.3	25.3	25.3	31.717	292	16.8545	16.836	16.8922	16.8609	16.9155	16.924	16.866	16.9018	1.02878	0.17076
sll1758	sll1758	3	3	3	sll1758 MrsA protein homolog		1	3	3	3	7.7	7.7	7.7	51.676	481	15.5539	15.6271	15.6115	15.5975	15.5535	15.7454	15.7865	15.6951	1.07004	0.305405
sll1760	sll1760	4	4	4	sll1760 homoserine kinase		1	4	4	4	17	17	17	32.427	306	13.6879	13.6005	13.7701	13.6862	13.5666	13.5351	13.5756	13.5591	0.915678	0.114289
sll1762	sll1762	16	16	16	sll1762 periplasmic protein, putative polar amino acid transport system substrate-binding protein		1	16	16	16	60.2	60.2	60.2	32.831	299	19.2404	19.2218	19.2548	19.239	19.1953	19.1934	19.1831	19.1906	0.966993	0.0244617
sll1764	sll1764	1	1	1	sll1764 unknown protein		1	1	1	1	9	9	9	14.296	144	10.323	10.4697	10.7025	10.4984	10.5562	10.6077	10.685	10.6163	1.08515	0.401242
sll1766	sll1766	8	8	8	sll1766 hypothetical protein		1	8	8	8	24.6	24.6	24.6	45.702	398	16.2609	16.2039	16.3191	16.2613	16.167	16.1177	16.1536	16.1461	0.923256	0.0568225
sll1767	sll1767	4	4	4	sll1767 30S ribosomal protein S6		1	4	4	4	33.6	33.6	33.6	13.237	113	18.0995	18.0598	18.1099	18.0897	18.0838	18.0706	18.0678	18.0741	0.989207	0.416289
sll1768	sll1768	2	2	2	sll1768 probable oligopeptides ABC transporter permease protein		1	2	2	2	6.4	6.4	6.4	35.989	326	15.4364	15.4586	15.4441	15.4464	15.3359	15.359	15.4027	15.3659	0.945734	0.043218
sll1769	sll1769	5	5	5	sll1769 hypothetical protein		1	5	5	5	65.7	65.7	65.7	11.558	105	17.9306	17.9923	18.0681	17.997	18.0731	18.1654	18.1686	18.1357	1.1009	0.0550211
sll1770	sll1770	14	14	14	sll1770 hypothetical protein		1	14	14	14	26.3	26.3	26.3	67.127	585	16.5116	16.5057	16.6488	16.5554	16.8279	16.5551	16.608	16.6637	1.07798	0.33667
sll1771	sll1771	9	9	9	sll1771 protein serin-threonin phosphatase		1	9	9	9	48	48	48	28.472	254	17.4317	17.4707	17.3989	17.4338	17.4316	17.519	17.5571	17.5026	1.04882	0.20054
sll1772	sll1772	4	4	4	sll1772 DNA mismatch repair protein MutS		1	4	4	4	5.7	5.7	5.7	90.669	822	14.5943	14.5579	14.6085	14.5869	14.5974	14.6581	14.5809	14.6121	1.01765	0.424746
sll1773	sll1773	6	6	6	sll1773 hypothetical protein		1	6	6	6	25	25	25	25.7	232	16.7422	16.7548	16.7378	16.745	16.4642	16.5305	16.5248	16.5065	0.847632	0.00556514
sll1774	sll1774	8	1	0	sll1774 hypothetical protein		1	8	1	0	31.2	4.2	0	29.71	260	14.5805	14.5468	14.5044	14.5439	14.4714	14.4881	14.3659	14.4418	0.931711	0.0984885
sll1775	sll1775	20	20	20	sll1775 hypothetical protein		1	20	20	20	32.7	32.7	32.7	92.365	817	17.5702	17.5766	17.5311	17.5593	17.4544	17.4495	17.4727	17.4589	0.932758	0.00859657
sll1776	sll1776	5	5	5	sll1776 deoxyribose-phosphate aldolase		1	5	5	5	26.2	26.2	26.2	23.874	225	14.203	14.2683	14.0671	14.1795	13.9991	14.1512	14.2041	14.1182	0.958411	0.512528
sll1783	sll1783	6	6	6	sll1783 hypothetical protein		1	6	6	6	41.5	41.5	41.5	16.822	147	16.2167	16.2262	16.2051	16.216	15.7768	15.8581	15.8254	15.8201	0.760006	0.00215697
sll1784	sll1784	6	6	6	sll1784 periplasmic protein, function unknown		1	6	6	6	34.5	34.5	34.5	29.757	267	17.7165	17.8005	17.8811	17.7994	17.4238	17.5217	17.5499	17.4985	0.811738	0.00879797
sll1785	sll1785	11	11	11	sll1785 periplasmic protein, function unknown		1	11	11	11	50.7	50.7	50.7	30.011	268	19.5001	19.3945	19.4373	19.444	19.2039	19.1879	19.0935	19.1618	0.822347	0.0037748
sll1786	sll1786	11	11	11	sll1786 putative deoxyribonuclease, tatD homolog		1	11	11	11	46	46	46	29.258	261	17.4101	17.308	17.4837	17.4006	17.3849	17.3172	17.3813	17.3611	0.973022	0.533116
sll1787	sll1787	53	53	53	sll1787 RNA polymerase beta subunit		1	53	53	53	53.4	53.4	53.4	123.36	1102	19.922	19.9418	19.916	19.9266	19.886	19.8882	19.8899	19.888	0.973597	0.0358908
sll1789	sll1789	58	58	58	sll1789 RNA polymerase beta prime subunit		1	58	58	58	49.4	49.4	49.4	144.78	1317	20.2518	20.2331	20.2495	20.2448	20.2095	20.2175	20.2215	20.2162	0.980372	0.0210786
sll1796	sll1796	3	3	3	sll1796 cytochrome c553		1	3	3	3	40.8	40.8	40.8	12.463	120	15.8138	15.7559	15.8354	15.8017	15.6739	15.6807	15.7014	15.6853	0.922524	0.0285359
sll1797	sll1797	2	2	2	sll1797 hypothetical protein YCF21		1	2	2	2	6.9	6.9	6.9	23.351	202	13.5326	13.369	13.2625	13.388	13.4099	13.4228	13.7182	13.517	1.09349	0.372833
sll1799	sll1799	10	10	9	sll1799 50S ribosomal protein L3		1	10	10	9	62.4	62.4	58.7	22.741	213	16.8922	16.8515	16.7751	16.8396	16.925	16.8304	16.855	16.8702	1.02141	0.531117
sll1800	sll1800	7	7	7	sll1800 50S ribosomal protein L4		1	7	7	7	32.4	32.4	32.4	23.356	210	18.2158	18.2179	18.2041	18.2126	18.232	18.2814	18.2564	18.2566	1.03099	0.0802711
sll1801	sll1801	7	7	7	sll1801 50S ribosomal protein L23		1	7	7	7	55.4	55.4	55.4	11.526	101	18.814	18.7473	18.7883	18.7832	18.9077	18.8611	18.8502	18.873	1.06425	0.0270682
sll1802	sll1802	14	14	14	sll1802 50S ribosomal protein L2		1	14	14	14	50	50	50	30.433	276	18.2001	18.3177	18.3083	18.2754	18.5347	18.5597	18.6166	18.5704	1.22687	0.00476438
sll1803	sll1803	5	5	5	sll1803 50S ribosomal protein L22		1	5	5	5	53.7	53.7	53.7	13.502	121	16.7013	16.7362	16.6868	16.7081	16.8036	16.7686	16.7544	16.7755	1.04784	0.0312562
sll1804	sll1804	12	12	12	sll1804 30S ribosomal protein S3		1	12	12	12	50	50	50	27.147	240	18.2742	18.2924	18.2467	18.2711	18.2574	18.2686	18.2924	18.2728	1.00116	0.92577
sll1805	sll1805	3	3	3	sll1805 50S ribosomal protein L16		1	3	3	3	33.8	33.8	33.8	16.035	139	15.5633	15.5992	15.58	15.5808	15.5455	15.6832	15.7145	15.6477	1.04744	0.325803
sll1806	sll1806	7	7	7	sll1806 50S ribosomal protein L14		1	7	7	7	65.6	65.6	65.6	13.294	122	17.825	17.8712	17.8025	17.8329	17.8229	17.8422	17.7713	17.8121	0.985718	0.517605
sll1807	sll1807	7	7	7	sll1807 50S ribosomal protein L24		1	7	7	7	56.2	56.2	56.2	11.707	105	15.5539	15.676	15.5693	15.5997	16.5061	16.3372	16.4189	16.4207	1.76663	0.000260519
sll1808	sll1808	14	14	14	sll1808 50S ribosomal protein L5		1	14	14	14	67.5	67.5	67.5	22.508	200	18.6724	18.6298	18.6679	18.6567	18.6863	18.6881	18.7089	18.6944	1.0265	0.0890515
sll1809	sll1809	5	5	5	sll1809 30S ribosomal protein S8		1	5	5	5	41.4	41.4	41.4	14.666	133	16.9417	16.9782	16.9771	16.9657	16.9714	16.9768	16.9671	16.9718	1.00423	0.66585
sll1810	sll1810	12	12	12	sll1810 50S ribosomal protein L6		1	12	12	12	63.7	63.7	63.7	19.666	179	18.6718	18.6827	18.7695	18.708	18.7812	18.7663	18.793	18.7802	1.05128	0.137608
sll1811	sll1811	5	5	5	sll1811 50S ribosomal protein L18		1	5	5	5	35	35	35	13.204	120	17.422	17.407	17.496	17.4417	17.46	17.4168	17.401	17.4259	0.989142	0.659006
sll1812	sll1812	11	11	11	sll1812 30S ribosomal protein S5		1	11	11	11	64.2	64.2	64.2	18.241	173	18.7162	18.7398	18.7602	18.7387	18.7709	18.7892	18.8083	18.7895	1.0358	0.0395209
sll1813	sll1813	6	6	6	sll1813 50S ribosomal protein L15		1	6	6	6	45.6	45.6	45.6	15.194	147	17.8791	17.8852	17.8558	17.8733	17.8689	17.9062	17.9073	17.8941	1.01453	0.256614
sll1814	sll1814	4	4	4	sll1814 preprotein translocase SecY subunit		1	4	4	4	10	10	10	47.999	442	16.1623	16.1153	16.0448	16.1074	16.1179	16.142	16.1663	16.1421	1.02429	0.425483
sll1815	sll1815	7	7	7	sll1815 adenylate kinase		1	7	7	7	59.4	59.4	59.4	20.453	187	17.1995	17.1962	17.3006	17.2321	17.1729	17.2405	17.2237	17.2124	0.986424	0.652058
sll1816	sll1816	8	8	8	sll1816 30S ribosomal protein S13		1	8	8	8	50.4	50.4	50.4	14.572	127	18.0264	18	17.9566	17.9943	18.0997	18.0217	18.0071	18.0428	1.0342	0.247766
sll1817	sll1817	7	7	7	sll1817 30S ribosomal protein S11		1	7	7	7	60	60	60	13.762	130	17.1133	17.1828	17.1349	17.1436	17.4141	17.485	17.5951	17.498	1.27845	0.0124393
sll1818	sll1818	15	15	15	sll1818 RNA polymerase alpha subunit		1	15	15	15	65.6	65.6	65.6	35.003	314	17.6033	17.684	17.6051	17.6308	17.6154	17.6427	17.5989	17.619	0.991866	0.717443
sll1819	sll1819	7	7	7	sll1819 50S ribosomal protein L17		1	7	7	7	47.4	47.4	47.4	13.228	116	16.0783	16.1	16.077	16.0851	16.1228	16.0636	16.0923	16.0929	1.00544	0.70537
sll1820	sll1820	3	3	3	sll1820 tRNA pseudouridine synthase 1		1	3	3	3	13.8	13.8	13.8	31.355	275	13.5896	13.5632	13.5342	13.5623	13.2432	13.3111	13.3995	13.3179	0.844166	0.0226664
sll1821	sll1821	8	8	8	sll1821 50S ribosomal protein L13		1	8	8	8	68.2	68.2	68.2	16.99	151	17.9506	17.9443	17.8433	17.9128	17.9173	17.9255	17.9462	17.9297	1.0118	0.678394
sll1822	sll1822	8	8	8	sll1822 30S ribosomal protein S9		1	8	8	8	63.5	63.5	63.5	15.086	137	18.4891	18.4353	18.4292	18.4512	18.4739	18.3743	18.3776	18.4086	0.970902	0.337008
sll1823	sll1823	20	20	20	sll1823 adenylosuccinate synthetase		1	20	20	20	56	56	56	48.679	443	18.8611	18.8024	18.8321	18.8318	18.8093	18.7531	18.7797	18.7807	0.965183	0.0951358
sll1824	sll1824	2	2	2	sll1824 50S ribosomal protein L25		1	2	2	2	23.7	23.7	23.7	13.442	118	13.8487	13.9637	13.975	13.9292	13.8672	13.9833	14.0237	13.958	1.02021	0.665607
sll1825	sll1825	4	4	4	sll1825 hypothetical protein		1	4	4	4	28.1	28.1	28.1	20.301	196	16.0069	16.05	15.9279	15.9949	16.0391	16.0014	15.9695	16.0033	1.00586	0.849725
sll1830	sll1830	10	10	10	sll1830 unknown protein		1	10	10	10	30.2	30.2	30.2	39.648	358	18	17.9478	18.0331	17.9936	18.0271	18.0014	17.9929	18.0071	1.00939	0.654232
sll1831	sll1831	5	5	5	sll1831 glycolate oxidase subunit, (Fe-S)protein		1	5	5	5	16.3	16.3	16.3	50.548	460	15.2008	15.1732	15.1701	15.1814	15.2778	15.2169	15.2433	15.246	1.04584	0.0464458
sll1833	sll1833	5	5	5	sll1833 penicillin-binding protein		1	5	5	5	9.9	9.9	9.9	66.631	607	14.8615	14.9831	15.0722	14.9723	15.1177	15.0904	15.0896	15.0993	1.09202	0.170391
sll1834	sll1834	1	1	1	sll1834 hypothetical protein		1	1	1	1	9.7	9.7	9.7	15.49	134	12.1895	12.3039	12.0567	12.1834	12.1871	12.1376	12.0581	12.1276	0.962038	0.538354
sll1835	sll1835	6	6	6	sll1835 periplasmic protein, function unknown		1	6	6	6	40.8	40.8	40.8	28.832	265	15.874	15.9585	15.9507	15.9277	16.0831	16.0351	16.1481	16.0888	1.11809	0.0204931
sll1837	sll1837	5	5	5	sll1837 periplasmic protein, function unknown		1	5	5	5	20	20	20	15.467	145	16.5822	16.6055	16.6381	16.6086	16.6888	16.6886	16.6398	16.6724	1.0452	0.0501433
sll1841	sll1841	11	11	11	sll1841 pyruvate dehydrogenase dihydrolipoamide acetyltransferase component (E2)		1	11	11	11	39.3	39.3	39.3	44.898	433	18.3643	18.3675	18.4669	18.3996	18.5161	18.5086	18.5182	18.5143	1.08277	0.0752931
sll1848	sll1848	5	5	5	sll1848 putative acyltransferas		1	5	5	5	21.8	21.8	21.8	24.298	225	16.4264	16.4212	16.3635	16.4037	16.2703	16.2552	16.1902	16.2386	0.891859	0.00722532
sll1852	sll1852	7	7	7	sll1852 nucleoside diphosphate kinase		1	7	7	7	49.7	49.7	49.7	16.692	149	17.516	17.5224	17.544	17.5275	17.7713	17.7505	17.7221	17.748	1.16516	0.000597926
sll1853	sll1853	1	1	1	sll1853 unknown protein		1	1	1	1	6.5	6.5	6.5	17.92	154	13.3795	13.3294	13.3388	13.3493	13.1426	13.0631	13.1257	13.1105	0.847445	0.00225802
sll1854	sll1854	6	6	6	sll1854 exodeoxyribonuclease III		1	6	6	6	26	26	26	30.734	265	15.8607	15.8911	16.0153	15.9224	15.9779	15.9202	15.9632	15.9538	1.022	0.584523
sll1862	sll1862	3	3	3	sll1862 unknown protein		1	3	3	3	34.3	34.3	34.3	15.194	143	12.9578	13.072	13.0997	13.0432	12.8982	13.1062	12.8561	12.9535	0.939733	0.383185
sll1863	sll1863	4	4	4	sll1863 unknown protein		1	4	4	4	54.2	54.2	54.2	12.354	107	15.5674	15.5226	15.3965	15.4955	15.2828	15.355	15.259	15.2989	0.872628	0.0409313
sll1864	sll1864	5	5	5	sll1864 probable chloride channel protein		1	5	5	5	5.7	5.7	5.7	98.468	899	15.7603	15.8675	16.1198	15.9159	15.8418	15.8905	15.8475	15.8599	0.961976	0.653385
sll1865	sll1865	4	4	4	sll1865 peptide chain release factor 2		1	4	4	4	13.7	13.7	13.7	37.579	335	15.2043	15.3286	15.3891	15.3073	15.2234	15.0944	15.1714	15.1631	0.904834	0.103011
sll1866	sll1866	4	4	4	sll1866 hypothetical protein		1	4	4	4	31.7	31.7	31.7	21.634	199	17.4474	17.4497	17.3744	17.4238	17.2372	17.3055	17.2461	17.263	0.894479	0.00836758
sll1867;slr1311;slr1181	sll1867;slr1311;slr1181	8;8;4	8;8;4	8;8;4	sll1867 photosystem II D1 protein;slr1311 photosystem II D1 protein;slr1181 photosystem II D1 protein		3	8	8	8	27.5	27.5	27.5	39.721	360	18.3387	18.3668	18.3465	18.3507	18.3387	18.318	18.324	18.3269	0.983672	0.0900258
sll1868	sll1868	12	12	12	sll1868 DNA primase		1	12	12	12	18.6	18.6	18.6	73.078	635	17.1242	17.1268	17.3704	17.2072	17.365	17.3524	17.6447	17.4541	1.18665	0.12238
sll1869	sll1869	6	6	6	sll1869 probable dioxygenase, Rieske iron-sulfur component		1	6	6	6	14	14	14	40.828	357	15.3319	15.3711	15.3396	15.3475	15.4754	15.4099	15.4814	15.4556	1.07776	0.0246501
sll1870	sll1870	4	4	4	sll1870 ATP-binding protein of ABC transporter		1	4	4	4	21.2	21.2	21.2	25.495	226	14.33	14.392	14.2893	14.3371	14.4825	14.3575	14.4404	14.4268	1.06414	0.133859
sll1871	sll1871	11	11	11	sll1871 two-component system sensory histidine kinase		1	11	11	11	15.1	15.1	15.1	74.934	674	16.3816	16.4717	16.5402	16.4645	16.3742	16.4389	16.4417	16.4183	0.968447	0.433608
sll1872	sll1872	7	7	7	sll1872 transcriptional regulator		1	7	7	7	16.6	16.6	16.6	50.774	463	15.8058	15.8435	15.858	15.8357	16.0155	16.024	15.973	16.0042	1.12385	0.00160375
sll1873	sll1873	9	9	9	sll1873 unknown protein		1	9	9	9	71.9	71.9	71.9	12.906	121	18.6323	18.6835	18.7004	18.6721	18.7889	18.7915	18.8321	18.8042	1.09591	0.00840995
sll1874	sll1874	1	1	1	sll1874 hypothetical protein		1	1	1	1	2	2	2	41.94	358	13.8846	13.8223	13.88	13.8623	14.2255	13.8586	13.928	14.004	1.10321	0.334364
sll1878	sll1878	4	4	4	sll1878 iron(III)-transport ATP-binding protein		1	4	4	4	15.5	15.5	15.5	40.62	368	13.9865	14.0548	13.9688	14.0034	13.8276	13.9927	13.8428	13.8877	0.922945	0.146103
sll1879	sll1879	3	3	3	sll1879 two-component response regulator		1	3	3	3	6	6	6	63.806	562	14.8961	14.8624	14.9325	14.897	14.9022	14.8468	14.8652	14.8714	0.982386	0.38194
sll1880	sll1880	1	1	1	sll1880 hypothetical protein		1	1	1	1	8.8	8.8	8.8	16.435	147	13.9978	13.9497	14.0299	13.9925	14.0633	13.9503	14.0477	14.0205	1.01959	0.549875
sll1882	sll1882	2	2	2	sll1882 unknown protein		1	2	2	2	10.3	10.3	10.3	19.671	174	14.1189	14.3189	14.0265	14.1548	14.4933	14.5719	14.4725	14.5126	1.28147	0.0414477
sll1883	sll1883	17	17	17	sll1883 arginine biosynthesis bifunctional protein ArgJ		1	17	17	17	51.6	51.6	51.6	43.32	413	18.7739	18.7862	18.8925	18.8175	18.6807	18.744	18.7214	18.7153	0.931627	0.0953608
sll1884	sll1884	7	7	7	sll1884 hypothetical protein		1	7	7	7	17.6	17.6	17.6	42.864	374	15.7592	15.7345	16.0318	15.8418	15.8868	15.7351	15.7313	15.7844	0.960966	0.631388
sll1885	sll1885	5	5	5	sll1885 unknown protein		1	5	5	5	7.1	7.1	7.1	91.834	845	14.947	14.9565	15.0294	14.9776	15.4728	15.4238	15.3841	15.4269	1.36532	0.000252241
sll1886	sll1886	1	1	1	sll1886 hypothetical protein		1	1	1	1	5.3	5.3	5.3	21.028	188	14.7858	14.7397	14.8155	14.7803	14.6937	14.7292	14.6194	14.6808	0.93333	0.0721271
sll1888	sll1888	5	5	5	sll1888 two-component sensor histidine kinase		1	5	5	5	13.7	13.7	13.7	47.413	432	16.5837	16.5292	16.6552	16.5894	16.5361	16.5243	16.5363	16.5322	0.961164	0.256922
sll1891	sll1891	2	2	2	sll1891 unknown protein		1	2	2	2	13.1	13.1	13.1	26.435	252	13.1916	13.1415	13.0989	13.144	13.3186	13.3276	13.3593	13.3351	1.14166	0.00904695
sll1892	sll1892	5	5	5	sll1892 unknown protein		1	5	5	5	27.8	27.8	27.8	25.668	248	16.2873	16.2931	16.3092	16.2965	16.2385	16.2062	16.2586	16.2345	0.957887	0.0395249
sll1893	sll1893	9	9	9	sll1893 cyclase		1	9	9	9	40.6	40.6	40.6	27.973	261	15.9214	15.9452	15.8721	15.9129	15.8825	15.8404	15.8495	15.8575	0.962295	0.106387
sll1894	sll1894	16	16	16	sll1894 riboflavin biosynthesis protein RibA		1	16	16	16	34.4	34.4	34.4	61.681	556	17.0842	17.1477	17.1813	17.1377	17.1641	17.1985	17.2097	17.1908	1.03746	0.195533
sll1895	sll1895	15	15	15	sll1895 hypothetical protein		1	15	15	15	22.3	22.3	22.3	79.67	696	16.7526	16.7303	16.6958	16.7263	16.7641	16.7091	16.6874	16.7202	0.995809	0.84117
sll1900	sll1900	2	2	2	sll1900 acetyltransferase		1	2	2	2	9.6	9.6	9.6	23.306	209	16.823	16.7507	16.8031	16.7923	16.9049	16.9123	16.8981	16.9051	1.08133	0.0308963
sll1902	sll1902	9	9	9	sll1902 hypothetical protein		1	9	9	9	25.8	25.8	25.8	45.949	399	15.9558	15.995	15.9337	15.9615	15.8993	15.9716	15.8864	15.9191	0.971038	0.265037
sll1905	sll1905	9	9	9	sll1905 two-component hybrid sensor and regulator		1	9	9	9	9.4	9.4	9.4	111.6	1014	16.6802	16.7926	16.8928	16.7885	16.7819	16.7945	16.8369	16.8044	1.01108	0.823297
sll1906	sll1906	4	4	4	sll1906 hypothetical protein		1	4	4	4	9.1	9.1	9.1	51.49	484	15.0749	15.1668	15.1002	15.1139	15.2629	15.2097	15.1436	15.2054	1.06545	0.110171
sll1908	sll1908	15	15	15	sll1908 D-3-phosphoglycerate dehydrogenase		1	15	15	15	31.6	31.6	31.6	56.211	526	19.3647	19.3666	19.3763	19.3692	19.3151	19.3699	19.2931	19.326	0.970508	0.196586
sll1909	sll1909	4	4	4	sll1909 probable methyltransferase		1	4	4	4	14.3	14.3	14.3	33.698	300	16.1409	16.0918	15.9875	16.0734	16.0194	16.0355	16.0931	16.0493	0.983455	0.666661
sll1910	sll1910	19	19	19	sll1910 protein conferring resistance to acetazolamide Zam		1	19	19	19	26.8	26.8	26.8	87.546	781	17.7884	17.7907	17.7107	17.7633	17.8424	17.8292	17.8136	17.8284	1.04619	0.120892
sll1911	sll1911	7	7	7	sll1911 hypothetical protein		1	7	7	7	74.1	74.1	74.1	8.9621	81	16.4321	16.4803	16.3881	16.4335	16.6496	16.6282	16.6032	16.627	1.14357	0.00777631
sll1913	sll1913	9	9	9	sll1913 hypothetical protein		1	9	9	9	17.2	17.2	17.2	66.599	599	16.5949	16.5851	16.6472	16.6091	16.763	16.6672	16.6869	16.7057	1.06926	0.0596783
sll1915	sll1915	5	5	5	sll1915 hypothetical protein		1	5	5	5	26.8	26.8	26.8	21.001	183	15.6186	15.6372	16.0745	15.7768	15.6735	15.7098	15.7083	15.6972	0.946329	0.646947
sll1916	sll1916	1	1	1	sll1916 hypothetical protein		1	1	1	1	4	4	4	22.71	200	13.7582	13.7018	13.6629	13.7076	13.666	13.613	13.6183	13.6324	0.949202	0.0947603
sll1920	sll1920	12	12	12	sll1920 copper-transporting P-type ATPase PacS		1	12	12	12	15.6	15.6	15.6	79.949	745	17.215	17.1044	17.1193	17.1462	17.179	17.085	17.1268	17.1303	0.988998	0.736386
sll1924	sll1924	3	3	3	sll1924 cAMP receptor protein sycrp1 homolog		1	3	3	3	11.6	11.6	11.6	27.015	241	16.6013	16.5722	16.5665	16.58	16.6337	16.6207	16.5894	16.6146	1.02428	0.114309
sll1925	sll1925	4	4	4	sll1925 hypothetical protein		1	4	4	4	19.3	19.3	19.3	25.843	238	14.0257	14.0716	14.0081	14.0351	14.2111	14.0973	14.1968	14.1684	1.09677	0.045228
sll1927	sll1927	12	12	12	sll1927 ABC transporter ATP-binding protein		1	12	12	12	28.7	28.7	28.7	69.206	617	16.3742	16.3252	16.4006	16.3667	16.2661	16.2988	16.2649	16.2766	0.939473	0.0367322
sll1929	sll1929	5	5	5	sll1929 competence protein ComE		1	5	5	5	7.5	7.5	7.5	77.81	709	15.3983	15.433	15.7403	15.5239	15.6039	15.6066	15.6006	15.6037	1.0569	0.538984
sll1931	sll1931	14	14	14	sll1931 serine hydroxymethyltransferase		1	14	14	14	42.2	42.2	42.2	46.259	427	18.3688	18.1867	18.1979	18.2511	18.1191	18.097	18.1319	18.116	0.910592	0.145069
sll1932	sll1932	33	32	32	sll1932 DnaK protein		1	33	32	32	47.1	46.2	46.2	86.029	771	18.2184	18.2389	18.257	18.2381	18.1751	18.1672	18.1401	18.1608	0.947839	0.00742435
sll1933	sll1933	8	8	8	sll1933 DnaJ protein, heat shock protein 40, molecular chaperone		1	8	8	8	26.7	26.7	26.7	34.698	307	15.7202	15.739	15.8496	15.7696	15.8496	15.7623	15.8275	15.8131	1.03062	0.424787
sll1934	sll1934	2	2	2	sll1934 hypothetical protein		1	2	2	2	18.2	18.2	18.2	16.541	148	13.8955	13.839	13.9698	13.9014	13.7227	13.7852	13.9143	13.8074	0.936895	0.248071
sll1937	sll1937	2	2	2	sll1937 ferric uptake regulation protein		1	2	2	2	15.9	15.9	15.9	15.422	138	14.0145	14.0119	14.0632	14.0299	13.7557	13.9658	13.8526	13.858	0.887702	0.096394
sll1938	sll1938	5	5	5	sll1938 hypothetical protein		1	5	5	5	36.5	36.5	36.5	22.548	203	15.755	15.708	15.5988	15.6873	15.6117	15.4727	15.4955	15.5266	0.894646	0.0641551
sll1939	sll1939	5	5	5	sll1939 unknown protein		1	5	5	5	25.7	25.7	25.7	24.178	214	14.7544	14.8312	14.9048	14.8301	14.7136	14.7013	14.6627	14.6925	0.909045	0.0734636
sll1940	sll1940	2	2	2	sll1940 hypothetical protein		1	2	2	2	15.9	15.9	15.9	17.011	157	14.5284	14.5362	14.4288	14.4978	14.4476	14.4126	14.3848	14.415	0.944206	0.123266
sll1941	sll1941	14	13	13	sll1941 DNA gyrase A subunit		1	14	13	13	16.7	15.9	15.9	101.16	920	17.2685	17.2429	17.2999	17.2704	17.1644	17.1508	17.1601	17.1584	0.925293	0.0164994
sll1945	sll1945	14	14	14	sll1945 1-deoxyxylulose-5-phosphate synthase		1	14	14	14	30.5	30.5	30.5	69.327	640	17.1747	17.2212	17.2577	17.2179	17.1989	17.3208	17.4024	17.3074	1.064	0.266814
sll1946	sll1946	3	3	3	sll1946 hypothetical protein		1	3	3	3	3.4	3.4	3.4	92.514	825	14.7173	14.6878	14.5703	14.6585	14.5457	14.5382	14.4844	14.5228	0.910225	0.0774481
sll1949	sll1949	6	6	6	sll1949 unknown protein		1	6	6	6	28.3	28.3	28.3	25.259	247	15.9181	15.8662	15.879	15.8878	16.5068	16.3893	16.4268	16.441	1.46734	0.00105074
sll1950	sll1950	2	2	2	sll1950 unknown protein		1	2	2	2	9	9	9	27.524	244	14.3761	14.3877	14.4875	14.4171	14.4814	14.4296	14.4206	14.4439	1.0187	0.552003
sll1951	sll1951	2	2	2	sll1951 unknown protein		1	2	2	2	1.1	1.1	1.1	178.26	1741	16.4478	16.3773	16.5347	16.4533	16.6136	16.5574	16.5869	16.586	1.09635	0.0868343
sll1957	sll1957	2	2	2	sll1957 transcriptional regulator		1	2	2	2	17.3	17.3	17.3	12.346	104	14.032	13.9563	14.2981	14.0955	13.9803	13.997	13.8667	13.948	0.902856	0.289754
sll1958	sll1958	6	6	6	sll1958 histidinol phosphate aminotransferase		1	6	6	6	21.5	21.5	21.5	40.686	367	15.6887	15.7083	15.5748	15.6572	15.6715	15.6684	15.5539	15.6313	0.982179	0.671897
sll1959	sll1959	3	3	3	sll1959 probable inositol monophosphatase		1	3	3	3	14.6	14.6	14.6	29.243	267	13.4619	13.4848	13.528	13.4916	13.5031	13.4464	13.4601	13.4699	0.985048	0.448355
sll1961	sll1961	12	12	12	sll1961 hypothetical protein		1	12	12	12	42.3	42.3	42.3	38.078	343	15.9831	16.0121	15.9517	15.9823	15.9212	15.9408	15.9227	15.9282	0.963221	0.0763909
sll1967	sll1967	14	14	14	sll1967 probable RNA methyltransferase		1	14	14	14	32.8	32.8	32.8	51.522	463	17.353	17.3147	17.4353	17.3677	17.3716	17.365	17.3607	17.3658	0.998662	0.961706
sll1968	sll1968	2	2	2	sll1968 photomixotrophic growth related protein, PmgA		1	2	2	2	8.1	8.1	8.1	25.327	222	14.4214	14.4421	14.2699	14.3778	14.3191	14.2526	14.3375	14.3031	0.949496	0.305788
sll1971	sll1971	9	9	9	sll1971 probable hexosyltransferase		1	9	9	9	21.8	21.8	21.8	45.177	395	16.7358	16.7143	16.7486	16.7329	16.6355	16.604	16.5812	16.6069	0.916341	0.00446309
sll1979	sll1979	4	4	4	sll1979 hypothetical protein		1	4	4	4	34.5	34.5	34.5	15.946	142	15.5437	15.632	15.3732	15.5163	15.2692	15.3802	15.2957	15.315	0.869782	0.10157
sll1980	sll1980	4	4	4	sll1980 thiol:disulfide interchange protein TrxA		1	4	4	4	31.7	31.7	31.7	19.517	180	16.3182	16.264	16.0729	16.2183	16.2198	16.3464	16.3199	16.2954	1.05484	0.425822
sll1981	sll1981	14	14	14	sll1981 acetolactate synthase		1	14	14	14	36	36	36	60.173	550	18.7568	18.68	18.7607	18.7325	18.8849	18.7914	18.8194	18.8319	1.07132	0.0600256
sll1985	sll1985	1	1	1	sll1985 putative transposase [ISY352c: 1553414 - 1553903, join 1554854 - 1555790]		1	1	1	1	7.6	7.6	7.6	14.186	119	11.5291	11.5568	12.1946	11.7602	11.8549	12.0198	11.7107	11.8618	1.07299	0.698018
sll1987	sll1987	22	22	22	sll1987 catalase peroxidase		1	22	22	22	40.1	40.1	40.1	81.43	729	18.8347	18.8182	18.8549	18.8359	18.822	18.814	18.8524	18.8295	0.995527	0.703079
sll1988	sll1988	8	8	8	sll1988 33 kDa chaperonin		1	8	8	8	39.4	39.4	39.4	32.204	302	16.4691	16.454	16.4514	16.4582	16.4245	16.4386	16.477	16.4467	0.99208	0.548907
sll1994	sll1994	14	14	14	sll1994 porphobilinogen synthase (5-aminolevulinate dehydratase)		1	14	14	14	56	56	56	36.163	327	17.7092	17.6959	17.7141	17.7064	17.6372	17.6526	17.6252	17.6384	0.953918	0.00329915
sll1995	sll1995	4	4	4	sll1995 hypothetical protein		1	4	4	4	10.7	10.7	10.7	35.85	309	14.3637	14.4518	14.3233	14.3796	14.3982	14.3753	14.3551	14.3762	0.997656	0.938882
sll2001	sll2001	11	11	11	sll2001 leucine aminopeptidase		1	11	11	11	27.2	27.2	27.2	53.885	508	17.9472	17.9429	17.9156	17.9352	17.9142	17.9062	17.8932	17.9045	0.978953	0.0694813
sll2002	sll2002	11	11	11	sll2002 hypothetical protein		1	11	11	11	45.9	45.9	45.9	32.871	292	17.4454	17.4311	17.4823	17.4529	17.406	17.3719	17.4439	17.4073	0.968848	0.158118
sll2003	sll2003	2	2	2	sll2003 hypothetical protein		1	2	2	2	4.1	4.1	4.1	58.154	517	14.6835	14.7426	14.7433	14.7231	14.8044	14.8914	14.7701	14.822	1.07093	0.0929477
sll2005	sll2005	25	25	25	sll2005 DNA gyrase B subunit [Contains: Ssp gyrB intein]		1	25	25	25	25.8	25.8	25.8	122.82	1078	18.6391	18.5974	18.5649	18.6005	18.6169	18.5611	18.5279	18.5686	0.978169	0.399675
sll2006	sll2006	2	2	2	sll2006 hypothetical protein		1	2	2	2	16.9	16.9	16.9	13.461	118	12.3317	12.3819	12.5296	12.4144	12.6563	12.4553	12.328	12.4799	1.04642	0.597675
sll2008	sll2008	2	2	2	sll2008 processing protease		1	2	2	2	3.7	3.7	3.7	47.976	430	12.303	12.299	12.4655	12.3558	12.6802	12.5667	12.4577	12.5682	1.15858	0.0673035
sll2009	sll2009	7	7	7	sll2009 processing protease		1	7	7	7	19.1	19.1	19.1	48.104	435	15.4978	15.6066	15.6711	15.5918	15.6804	15.6492	15.6845	15.6713	1.05665	0.253855
sll2010	sll2010	9	9	9	sll2010 UDP-N-acetylmuramoylalanine--D-glutamate ligase		1	9	9	9	25.9	25.9	25.9	49.048	452	17.0963	17.2096	16.9346	17.0801	16.8243	17.0704	16.9766	16.9571	0.918249	0.31603
sll2011	sll2011	4	4	4	sll2011 hypothetical protein		1	4	4	4	26.4	26.4	26.4	23.508	208	14.8304	14.7219	14.7705	14.7743	14.6329	14.6811	14.6666	14.6602	0.923992	0.0503612
sll2012	sll2012	7	6	6	sll2012 group2 RNA polymerase sigma factor SigD		1	7	6	6	22.6	20.1	20.1	36.341	318	14.7205	14.6743	14.8819	14.7589	14.7811	14.8598	14.8739	14.8383	1.05658	0.339647
sll2014	sll2014	7	7	7	sll2014 sugar fermentation stimulation protein		1	7	7	7	30.4	30.4	30.4	26.847	237	16.3366	16.2815	16.3652	16.3278	16.3568	16.294	16.3165	16.3224	0.996329	0.871695
sll5002	sll5002	1	1	1	sll5002 unknown protein		1	1	1	1	13	13	13	13.213	115	13.0414	13.1373	13.2084	13.129	12.9036	13.1306	12.8262	12.9535	0.885428	0.186773
sll5003	sll5003	1	1	1	sll5003 hypothetical protein		1	1	1	1	6.7	6.7	6.7	15.098	134	14.257	14.2418	14.3242	14.2743	14.4836	14.3863	14.456	14.442	1.12319	0.0125686
sll5033	sll5033	4	4	4	sll5033 hypothetical protein		1	4	4	4	27.9	27.9	27.9	19.892	179	16.7509	16.6298	16.8216	16.7341	16.9148	16.7488	16.8188	16.8275	1.06687	0.276167
sll5034	sll5034	9	9	9	sll5034 hypothetical protein		1	9	9	9	51.2	51.2	51.2	23.2	207	16.9857	16.991	16.9667	16.9812	16.8987	16.8458	16.8683	16.8709	0.926451	0.00842759
sll5035	sll5035	2	2	2	sll5035 transcriptional regulatory protein ArsR family		1	2	2	2	14.3	14.3	14.3	12.525	112	15.6809	15.7817	15.7005	15.721	15.8666	15.8761	15.8419	15.8615	1.10229	0.0345633
sll5042	sll5042	7	7	7	sll5042 probable sulfotransferase		1	7	7	7	24.3	24.3	24.3	32.954	280	16.8062	16.644	16.6789	16.7097	16.7191	16.6246	16.6347	16.6595	0.965754	0.442167
sll5043	sll5043	1	1	1	sll5043 probable glycosyltransferase		1	1	1	1	4.3	4.3	4.3	37.109	328	9.66168	9.26741	9.75346	9.56085	10.0533	9.55211	9.4711	9.69216	1.09529	0.607686
sll5046	sll5046	2	2	2	sll5046 unknown protein		1	2	2	2	6.3	6.3	6.3	36.828	316	14.8202	14.92	14.9292	14.8898	15.1779	15.0982	15.0865	15.1209	1.17373	0.00763451
sll5048	sll5048	3	3	3	sll5048 probable glycosyltransferase		1	3	3	3	9.9	9.9	9.9	39.933	362	14.3273	14.6881	15.284	14.7664	14.7143	14.882	15.0743	14.8902	1.08959	0.710063
sll5050	sll5050	3	3	3	sll5050 probable glycosyltransferase		1	3	3	3	9.3	9.3	9.3	48.896	441	13.2922	13.3069	13.4108	13.3366	13.307	13.3174	13.2902	13.3048	0.978225	0.486501
sll5052	sll5052	5	5	5	sll5052 similar to exopolysaccharide export protein		1	5	5	5	6.6	6.6	6.6	82.986	740	15.9853	16.0441	16.025	16.0181	16.0179	16.0656	16.0627	16.0487	1.02144	0.258317
sll5059	sll5059	5	5	5	sll5059 two-component response regulator		1	5	5	5	20.9	20.9	20.9	33.416	302	15.0537	15.1081	15.0611	15.0743	15.0918	15.087	15.0739	15.0842	1.00691	0.625851
sll5060	sll5060	5	5	5	sll5060 two-component hybrid sensor & regulator		1	5	5	5	4	4	4	134.67	1209	14.2158	14.205	14.1653	14.1953	14.2488	14.2894	14.5342	14.3575	1.11895	0.207767
sll5066	sll5066	4	4	4	sll5066 probable plasmid partitioning protein, ParA family		1	4	4	4	28.9	28.9	28.9	22.544	204	14.4127	14.466	14.3832	14.4207	14.2784	14.2851	14.2185	14.2607	0.895024	0.00800009
sll5067	sll5067	3	3	3	sll5067 hypothetical protein		1	3	3	3	20.7	20.7	20.7	19.99	174	13.7269	13.3409	14.1029	13.7236	13.9736	13.8125	13.9318	13.906	1.13478	0.496476
sll5069	sll5069	1	1	1	sll5069 unknown protein		1	1	1	1	1.4	1.4	1.4	55.665	491	11.6947	11.5781	11.6907	11.6545	11.8743	12.0397	11.8454	11.9198	1.20186	0.0278921
sll5075	sll5075	3	3	3	sll5075 hypothetical protein		1	3	3	3	25.2	25.2	25.2	15.622	139	15.4868	15.5072	15.6567	15.5502	15.2822	15.2577	15.3103	15.2834	0.831144	0.0302671
sll5079	sll5079	8	8	8	sll5079 probable short chain dehydrogenase		1	8	8	8	34.2	34.2	34.2	28.689	272	16.1552	16.0892	16.157	16.1338	16.1226	16.0813	16.3623	16.1887	1.0388	0.599073
sll5080	sll5080	6	6	6	sll5080 non-heme chloroperoxidase		1	6	6	6	21.9	21.9	21.9	30.078	274	16.9422	16.9298	16.9891	16.9537	16.8536	16.8878	16.8789	16.8735	0.945901	0.027701
sll5081	sll5081	2	2	2	sll5081 hypothetical protein		1	2	2	2	9.2	9.2	9.2	30.884	262	14.2429	14.1953	14.0346	14.1576	14.028	14.1411	14.0884	14.0858	0.951469	0.386289
sll5094	sll5094	2	2	2	sll5094 plasmid stabilization protein		1	2	2	2	9.8	9.8	9.8	16.617	143	11.9467	11.7984	12.2355	11.9936	12.5006	12.0614	12.2341	12.2654	1.20734	0.207734
sll5128	sll5128	5	5	5	sll5128 unknown protein		1	5	5	5	24.9	24.9	24.9	39.453	345	15.2427	15.3503	15.1894	15.2608	15.0841	15.1563	15.1806	15.1403	0.919888	0.10968
sll6017;sll6076;sll0800	sll6017;sll6076	8;8;1	1;1;0	0;0;0	sll6017 hypothetical protein;sll6076 hypothetical protein		3	8	1	0	31.6	5.1	0	29.211	256	10.0633	10.2616	9.74674	10.0239	9.813	10.2151	10.3191	10.1157	1.06573	0.691487
sll6053	sll6053	1	1	1	sll6053 hypothetical protein		1	1	1	1	1.7	1.7	1.7	52.72	471	10.6885	10.8986	11.0337	10.8736	10.8041	10.4933	10.5886	10.6287	0.843851	0.146946
sll6055	sll6055	4	4	4	sll6055 hypothetical protein		1	4	4	4	36.8	36.8	36.8	17.444	152	15.1692	15.201	15.396	15.2554	15.2834	15.2672	15.3477	15.2994	1.03099	0.606494
sll6060	sll6060	4	4	4	sll6060 probable acetyltransferase		1	4	4	4	20.9	20.9	20.9	19.136	177	14.7312	14.771	14.798	14.7667	14.7851	14.7228	14.8467	14.7849	1.01266	0.68507
sll6093	sll6093	5	5	5	sll6093 chromosome partitioning protein, ParA family		1	5	5	5	29.8	29.8	29.8	21.648	198	15.0534	14.9601	15.1529	15.0554	15.2743	15.1754	15.2209	15.2235	1.12356	0.0750385
sll6098	sll6098	1	1	1	sll6098 hypothetical protein		1	1	1	1	3.1	3.1	3.1	40.532	358	11.4389	10.8237	9.30384	10.5221	10.0718	11.1781	12.1284	11.1261	1.51989	0.525606
sll7003	sll7003	2	2	2	sll7003 plasmid stability protein		1	2	2	2	15.5	15.5	15.5	15.986	142	14.0246	14.016	14.1931	14.0779	14.247	14.0552	13.9529	14.085	1.00496	0.948897
sll7028	sll7028	7	7	7	sll7028 hypothetical protein		1	7	7	7	20.3	20.3	20.3	47.057	418	15.4553	15.5061	15.5459	15.5024	15.3951	15.495	15.412	15.434	0.9537	0.168389
sll7031	sll7031	2	2	2	sll7031 hypothetical protein		1	2	2	2	18	18	18	10.876	100	15.26	15.1453	15.3428	15.2493	15.0365	15.0019	14.9965	15.0116	0.848101	0.0477653
sll7033	sll7033	3	3	3	sll7033 hypothetical protein		1	3	3	3	44.2	44.2	44.2	12.604	113	14.5702	14.6396	14.6259	14.6119	14.7396	14.804	14.7548	14.7661	1.11283	0.00595867
sll7034	sll7034	1	1	1	sll7034 hypothetical protein		1	1	1	1	10.9	10.9	10.9	12.21	110	12.8737	12.7005	12.4872	12.6871	12.8629	12.9613	12.7903	12.8715	1.13634	0.236407
sll7043	sll7043	6	6	6	sll7043 unknown protein		1	6	6	6	39.2	39.2	39.2	21.545	194	15.6848	15.699	15.6133	15.6657	15.8324	15.7238	15.7255	15.7606	1.06796	0.106745
sll7044	sll7044	3	3	3	sll7044 plasmid partition protein ParA homolog		1	3	3	3	11.4	11.4	11.4	20.669	193	15.6672	15.7085	15.7543	15.71	15.7876	15.7058	15.6692	15.7209	1.00756	0.814554
sll7047	sll7047	2	2	2	sll7047 hypothetical protein		1	2	2	2	8.2	8.2	8.2	26.161	243	14.666	14.6958	15.1317	14.8312	14.7623	14.7679	14.8946	14.8083	0.984241	0.895369
sll7062	sll7062	11	11	11	sll7062 unknown protein		1	11	11	11	41.8	41.8	41.8	42.304	371	15.3933	15.3884	15.4351	15.4056	15.5999	15.5943	15.6044	15.5995	1.14386	0.00450155
sll7063	sll7063	22	22	22	sll7063 unknown protein		1	22	22	22	27.8	27.8	27.8	90.211	795	17.6115	17.7005	17.6944	17.6688	18.1263	18.1133	18.0947	18.1114	1.35908	0.00206125
sll7064	sll7064	4	4	4	sll7064 unknown protein		1	4	4	4	19.7	19.7	19.7	21.875	193	15.2791	15.2184	15.253	15.2501	15.6462	15.5198	15.59	15.5853	1.26154	0.00431756
sll7065	sll7065	12	12	12	sll7065 unknown protein		1	12	12	12	28.4	28.4	28.4	56.758	522	16.3026	16.3766	16.4286	16.3693	16.6421	16.6418	16.6572	16.647	1.21232	0.0154927
sll7066	sll7066	23	23	23	sll7066 unknown protein		1	23	23	23	30	30	30	87.45	791	18.187	18.251	18.3483	18.2621	18.5517	18.5262	18.5559	18.5446	1.21633	0.02294
sll7067	sll7067	11	11	11	sll7067 unknown protein		1	11	11	11	24.2	24.2	24.2	62.247	558	16.7929	16.7983	16.7718	16.7877	17.1262	17.0823	17.0778	17.0954	1.23778	0.000381994
sll7069	sll7069	1	1	1	sll7069 hypothetical protein		1	1	1	1	12.5	12.5	12.5	11.172	104	15.9285	16.0149	16.1083	16.0172	15.9015	16.1034	15.9938	15.9995	0.987813	0.832109
sll7070	sll7070	2	2	2	sll7070 unknown protein		1	2	2	2	24.2	24.2	24.2	13.957	124	12.0159	12.0344	11.7856	11.9453	12.3238	12.3067	12.3428	12.3244	1.30053	0.0397902
sll7077	sll7077	1	1	1	sll7077 hypothetical protein		1	1	1	1	5.7	5.7	5.7	21.769	193	10.8034	10.3124	11.1089	10.7416	10.6109	10.6306	10.6881	10.6432	0.934089	0.713392
sll7078	sll7078	7	7	7	sll7078 unknown protein		1	7	7	7	21.5	21.5	21.5	35.02	288	16.5818	16.6071	16.6105	16.5998	16.6879	16.6803	16.6905	16.6862	1.06173	0.00610456
sll7085	sll7085	18	18	18	sll7085 unknown protein		1	18	18	18	34.2	34.2	34.2	65.409	576	18.1522	18.2207	18.1507	18.1746	18.6257	18.579	18.5693	18.5913	1.33493	0.000212877
sll7086	sll7086	4	4	4	sll7086 unknown protein		1	4	4	4	26.7	26.7	26.7	14.549	131	16.8809	16.8844	16.9726	16.9126	17.3998	17.3134	17.3556	17.3562	1.36	0.000408572
sll7087	sll7087	8	8	8	sll7087 unknown protein		1	8	8	8	35.8	35.8	35.8	29.929	268	16.6171	16.6696	16.6737	16.6535	16.9996	16.9773	17.0326	17.0032	1.27431	0.000149997
sll7089	sll7089	4	4	4	sll7089 unknown protein		1	4	4	4	11.1	11.1	11.1	42.152	370	13.7956	13.7505	13.8523	13.7995	14.3748	14.2853	14.4237	14.3613	1.47611	0.000583576
sll7090	sll7090	25	25	25	sll7090 unknown protein		1	25	25	25	31.1	31.1	31.1	111.43	979	18.1401	18.1944	18.1752	18.1699	18.5275	18.4935	18.5117	18.5109	1.26662	0.000187022
sll8001	sll8001	3	3	3	sll8001 hypothetical protein		1	3	3	3	8.3	8.3	8.3	39.628	348	13.7192	13.7044	13.9204	13.7813	13.8235	13.8371	13.7414	13.8007	1.01347	0.817041
sll8002	sll8002	3	3	3	sll8002 hypothetical protein		1	3	3	3	12.3	12.3	12.3	24.243	212	14.9453	14.9619	15.0583	14.9885	15.1483	15.0702	15.097	15.1052	1.08426	0.0592381
sll8004	sll8004	3	3	3	sll8004 hypothetical protein		1	3	3	3	20	20	20	20.674	185	13.4134	13.3493	13.5875	13.45	13.3692	13.3024	13.4281	13.3666	0.943772	0.37343
sll8007	sll8007	4	4	4	sll8007 unknown protein		1	4	4	4	41.4	41.4	41.4	13.002	116	15.7548	15.7434	15.8189	15.7724	15.7628	15.7448	15.8046	15.7707	0.998879	0.958987
sll8012	sll8012	6	6	6	sll8012 unknown protein		1	6	6	6	44.9	44.9	44.9	15.637	138	15.2637	15.3269	15.5312	15.374	15.2859	15.3745	15.3615	15.3407	0.977199	0.727741
sll8049	sll8049	21	21	21	sll8049 type I site-specific deoxyribonuclease chain R		1	21	21	21	24.2	24.2	24.2	111.87	989	17.9987	18.0452	18.1573	18.0671	17.9041	17.9762	17.9072	17.9292	0.90885	0.0806803
slr0001	slr0001	8	8	8	slr0001 hypothetical protein		1	8	8	8	51.2	51.2	51.2	17.451	160	17.2919	17.2451	17.3519	17.2963	17.3523	17.4096	17.388	17.3833	1.06215	0.0874663
slr0006	slr0006	5	5	5	slr0006 unknown protein		1	5	5	5	23.5	23.5	23.5	23.373	217	16.938	16.9582	16.9589	16.9517	16.9647	16.9988	16.9921	16.9852	1.02347	0.0641376
slr0007	slr0007	5	5	5	slr0007 probable sugar-phosphate nucleotidyltransferase		1	5	5	5	22.9	22.9	22.9	27.262	253	16.1723	16.0984	16.2041	16.1583	16.0708	16.0745	16.1104	16.0853	0.950648	0.131477
slr0008	slr0008	3	3	3	slr0008 carboxyl-terminal processing protease		1	3	3	3	7.7	7.7	7.7	46.69	427	13.4311	13.4575	13.5276	13.4721	13.5826	13.3263	13.5171	13.4753	1.00225	0.971372
slr0009	slr0009	27	27	27	slr0009 ribulose bisphosphate carboxylase large subunit		1	27	27	27	56.6	56.6	56.6	52.49	470	21.7945	21.8061	21.7933	21.798	21.7869	21.7992	21.6961	21.7608	0.974545	0.370844
slr0011	slr0011	2	2	2	slr0011 possible Rubisco chaperonin		1	2	2	2	14	14	14	15.314	136	13.3182	13.0277	13.6884	13.3447	13.3544	12.9544	13.1393	13.1494	0.873338	0.440983
slr0012	slr0012	7	7	7	slr0012 ribulose bisphosphate carboxylase small subunit		1	7	7	7	64.6	64.6	64.6	13.239	113	18.8336	18.8105	18.8101	18.8181	18.8749	18.8301	18.8476	18.8508	1.02295	0.112544
slr0013	slr0013	7	7	7	slr0013 hypothetical protein		1	7	7	7	50.3	50.3	50.3	18.69	175	17.2275	17.2184	17.1992	17.215	17.1641	17.1742	17.1684	17.1689	0.968517	0.021415
slr0015	slr0015	7	7	7	slr0015 lipid A disaccharide synthase		1	7	7	7	25.4	25.4	25.4	43.468	394	15.5254	15.4921	15.5471	15.5215	15.4935	15.5066	15.601	15.5337	1.00849	0.767021
slr0017	slr0017	10	10	10	slr0017 UDP-N-acetylglucosamine 1-carboxyvinyltransferase		1	10	10	10	24.9	24.9	24.9	46.604	438	16.0517	15.9844	16.0601	16.0321	16.0208	15.9638	15.965	15.9832	0.966681	0.187869
slr0018	slr0018	6	6	6	slr0018 fumarase		1	6	6	6	19.1	19.1	19.1	49.687	466	16.1017	16.0712	16.0417	16.0715	16.0972	16.1281	16.0611	16.0955	1.01672	0.409866
slr0020	slr0020	6	6	6	slr0020 DNA recombinase		1	6	6	6	6.1	6.1	6.1	93.658	831	15.1119	15.1341	15.1854	15.1438	15.1541	15.1256	15.1575	15.1457	1.00135	0.940585
slr0021	slr0021	5	5	5	slr0021 protease		1	5	5	5	28.2	28.2	28.2	30.273	277	15.9138	15.9093	15.9099	15.911	16.0459	15.9967	15.9841	16.0089	1.07021	0.0344486
slr0022	slr0022	3	3	3	slr0022 hypothetical protein		1	3	3	3	35	35	35	14.031	123	15.3374	15.3404	15.2948	15.3242	15.0745	15.1768	15.1657	15.139	0.879521	0.0164482
slr0023	slr0023	2	2	2	slr0023 unknown protein		1	2	2	2	13.2	13.2	13.2	23.101	204	13.3322	13.2653	13.4218	13.3398	13.4066	13.2919	13.4661	13.3882	1.03414	0.518322
slr0031	slr0031	12	12	12	slr0031 hypothetical protein		1	12	12	12	24.5	24.5	24.5	66.968	584	16.8328	16.8012	16.7324	16.7888	16.7466	16.7951	16.7632	16.7683	0.985878	0.578803
slr0032	slr0032	14	14	14	slr0032 probable branched-chain amino acid aminotransferase		1	14	14	14	50.2	50.2	50.2	33.951	305	17.4873	17.4632	17.374	17.4415	17.3223	17.3321	17.2891	17.3145	0.915719	0.0521498
slr0033	slr0033	4	4	4	slr0033 glutamyl-tRNA(Gln) amidotransferase subunit C		1	4	4	4	45.2	45.2	45.2	11.616	104	16.0588	16.1065	16.1421	16.1025	16.0646	16.1033	16.1511	16.1063	1.00268	0.917037
slr0038	slr0038	6	6	6	slr0038 hypothetical protein		1	6	6	6	37.9	37.9	37.9	15.24	132	16.8209	16.7971	16.6001	16.7394	16.7475	16.7065	16.7468	16.7336	0.995979	0.941965
slr0039	slr0039	9	9	9	slr0039 hypothetical protein		1	9	9	9	31.1	31.1	31.1	38.418	357	16.8297	16.8617	16.8432	16.8448	16.704	16.6863	16.7224	16.7042	0.907141	0.000582292
slr0043	slr0043	4	2	2	slr0043 bicarbonate transport system ATP-binding protein		1	4	2	2	6.3	3.4	3.4	74.096	667	14.4501	14.4944	15.0122	14.6522	14.5146	14.559	14.4575	14.5104	0.906345	0.51533
slr0049	slr0049	8	8	8	slr0049 hypothetical protein		1	8	8	8	27.4	27.4	27.4	44.058	398	17.0456	17.0349	17.0941	17.0582	17.0384	17.0523	17.0442	17.045	0.990866	0.545989
slr0050	slr0050	7	7	7	slr0050 hypothetical protein YCF56		1	7	7	7	20.9	20.9	20.9	36.122	326	15.9757	16.0064	16.1028	16.0283	16.0905	16.0488	16.0452	16.0615	1.02331	0.485474
slr0051	slr0051	5	5	5	slr0051 periplasmic beta-type carbonic anhydrase		1	5	5	5	26.6	26.6	26.6	27.89	263	15.9716	15.9764	15.841	15.9297	15.8221	15.9661	15.908	15.8987	0.97877	0.638337
slr0055	slr0055	3	3	3	slr0055 anthranilate synthase component II		1	3	3	3	28.8	28.8	28.8	17.86	163	14.5744	14.6089	14.5729	14.5854	14.3618	14.3936	14.3944	14.3833	0.86927	0.000233654
slr0056	slr0056	3	3	3	slr0056 chlorophyll a synthase		1	3	3	3	9.6	9.6	9.6	35.208	324	14.4897	14.5268	14.508	14.5082	14.4079	14.4989	14.4151	14.4407	0.954274	0.135059
slr0058	slr0058	5	5	5	slr0058 hypothetical protein		1	5	5	5	46.5	46.5	46.5	16.485	142	16.497	16.529	16.5174	16.5145	16.6454	16.5664	16.5855	16.5991	1.06042	0.0557934
slr0060	slr0060	8	8	8	slr0060 unknown protein		1	8	8	8	18.7	18.7	18.7	41.84	369	15.9107	16.0209	15.9928	15.9748	16.0129	16.0535	16.1618	16.0761	1.0727	0.14753
slr0061	slr0061	2	2	2	slr0061 unknown protein		1	2	2	2	16.7	16.7	16.7	24.852	221	14.0421	14.077	14.1065	14.0752	14.2836	14.4035	14.3181	14.3351	1.19741	0.0073978
slr0063	slr0063	24	24	24	slr0063 pilus biogenesis protein homologous to general secretion pathway protein E		1	24	24	24	40.9	40.9	40.9	75.111	672	18.792	18.7754	18.7793	18.7822	18.6549	18.6329	18.6164	18.6347	0.902795	0.00177413
slr0064	slr0064	5	5	5	slr0064 hypothetical protein		1	5	5	5	14.6	14.6	14.6	43.002	384	14.5991	14.6237	14.704	14.6423	14.6442	14.6871	14.7152	14.6822	1.02805	0.359347
slr0065	slr0065	4	4	4	slr0065 hypothetical protein		1	4	4	4	29.7	29.7	29.7	23.616	212	14.0585	14.0759	13.8261	13.9868	14.0583	13.8085	13.8362	13.901	0.942248	0.489256
slr0066	slr0066	9	9	9	slr0066 riboflavin biosynthesis protein RibD		1	9	9	9	25.8	25.8	25.8	39.995	368	17.2205	17.2373	17.3281	17.262	17.2852	17.2451	17.4398	17.3234	1.04345	0.431246
slr0067	slr0067	10	10	10	slr0067 MRP protein homolog		1	10	10	10	30.6	30.6	30.6	37.131	353	16.8585	16.9167	16.9781	16.9178	17.0098	16.946	16.9765	16.9774	1.04223	0.223167
slr0069	slr0069	4	4	4	slr0069 unknown protein		1	4	4	4	21	21	21	25.572	219	14.383	14.2793	14.3375	14.3332	14.4998	14.4158	14.4306	14.4487	1.08336	0.0445831
slr0070	slr0070	8	8	8	slr0070 methionyl-tRNA formyltransferase		1	8	8	8	35.2	35.2	35.2	35.941	330	17.2962	17.2341	17.2894	17.2732	17.3595	17.3493	17.3726	17.3605	1.06235	0.0359047
slr0072	slr0072	6	6	6	slr0072 glucose inhibited division protein B		1	6	6	6	26.1	26.1	26.1	28.79	264	15.1621	15.1562	15.2197	15.1794	15.2477	15.2561	15.1696	15.2245	1.03177	0.263299
slr0073	slr0073	10	10	10	slr0073 two-component sensor histidine kinase		1	10	10	10	33	33	33	35	315	18.2151	18.261	18.2158	18.2306	18.2399	18.2274	18.2104	18.2259	0.996754	0.80438
slr0074	slr0074	14	14	14	slr0074 ABC transporter subunit		1	14	14	14	38.1	38.1	38.1	52.795	480	17.2277	17.2246	17.1328	17.1951	17.1885	17.2281	17.1667	17.1944	0.99955	0.986646
slr0075	slr0075	9	9	9	slr0075 ABC transporter ATP-binding protein		1	9	9	9	43.4	43.4	43.4	28.419	256	16.0512	16.0512	16.0559	16.0528	16.0711	16.0911	16.0937	16.0853	1.02279	0.0392426
slr0076	slr0076	13	13	13	slr0076 hypothetical protein		1	13	13	13	38.2	38.2	38.2	50.001	453	17.5448	17.5545	17.5664	17.5552	17.615	17.5887	17.6254	17.6097	1.0385	0.0201225
slr0077	slr0077	6	6	6	slr0077 cysteine desulfurase		1	6	6	6	18.3	18.3	18.3	46.411	420	16.0738	16.0028	16.1766	16.0844	16.1732	16.1106	16.0778	16.1206	1.02537	0.573596
slr0078	slr0078	5	5	5	slr0078 putative 6-pyruvoyl tetrahydrobiopterin synthase		1	5	5	5	54.3	54.3	54.3	14.537	129	15.0874	15.1427	15.1183	15.1161	15.1108	15.1388	15.1553	15.135	1.01314	0.414763
slr0079	slr0079	12	12	12	slr0079 probable general secretion pathway protein E		1	12	12	12	18.2	18.2	18.2	90.135	813	16.2367	16.1287	16.1587	16.1747	16.3422	16.1664	16.3808	16.2965	1.0881	0.198659
slr0080	slr0080	5	5	5	slr0080 ribonuclease H		1	5	5	5	28.1	28.1	28.1	17.856	160	15.3456	15.3253	15.1418	15.2709	15.3068	15.1913	15.1716	15.2232	0.967498	0.575937
slr0081	slr0081	4	4	4	slr0081 two-component response regulator OmpR subfamily		1	4	4	4	16.4	16.4	16.4	29.926	262	16.2511	16.176	16.2132	16.2134	16.0159	16.0182	15.9448	15.993	0.858315	0.00254204
slr0082	slr0082	11	11	11	slr0082 hypothetical protein		1	11	11	11	27.8	27.8	27.8	49.362	443	14.8708	14.876	14.874	14.8736	14.931	14.8901	14.8928	14.9046	1.02176	0.141261
slr0083	slr0083	14	14	14	slr0083 RNA helicase Light		1	14	14	14	33.9	33.9	33.9	55.119	492	17.0929	17.1136	17.2014	17.136	16.8704	16.9333	16.886	16.8966	0.847094	0.00699247
slr0084	slr0084	5	5	5	slr0084 amidotransferase HisH		1	5	5	5	32.9	32.9	32.9	22.497	210	16.2896	16.3003	16.2877	16.2925	16.1904	16.2699	16.2149	16.2251	0.954297	0.0990948
slr0086	slr0086	6	6	6	slr0086 similar to DnaK protein		1	6	6	6	11.7	11.7	11.7	59.184	531	15.2469	15.2792	15.3061	15.2774	15.3245	15.2642	15.2735	15.2874	1.00697	0.713191
slr0088	slr0088	11	11	11	slr0088 beta-carotene ketolase		1	11	11	11	17.7	17.7	17.7	59.4	542	16.9959	17.0221	17.0551	17.0244	17.0981	17.0888	17.0708	17.0859	1.04359	0.0512481
slr0089	slr0089	7	7	7	slr0089 gamma-tocopherol methyltransferase		1	7	7	7	23.7	23.7	23.7	35.57	317	16.0242	16.0849	16.0662	16.0584	16.1294	16.1493	16.1673	16.1487	1.06455	0.0189967
slr0091	slr0091	2	2	2	slr0091 aldehyde dehydrogenase		1	2	2	2	3.5	3.5	3.5	51.187	456	14.7601	14.9983	14.7981	14.8522	14.7266	14.8237	14.3856	14.6453	0.866424	0.2633
slr0093	slr0093	10	10	10	slr0093 DnaJ protein, heat shock protein 40, molecular chaperone		1	10	10	10	28	28	28	36.365	332	17.2582	17.2517	17.0708	17.1936	17.2608	17.275	17.2603	17.2654	1.05102	0.362873
slr0104	slr0104	10	10	10	slr0104 hypothetical protein		1	10	10	10	15.2	15.2	15.2	90.254	811	16.0761	16.164	16.1213	16.1205	16.2716	16.2704	16.2929	16.2783	1.11559	0.0185077
slr0105	slr0105	18	18	18	slr0105 hypothetical protein		1	18	18	18	40.9	40.9	40.9	51.93	462	17.7328	17.7177	17.6748	17.7084	18.0539	18.0025	17.9703	18.0089	1.23155	0.000901095
slr0106	slr0106	10	10	10	slr0106 unknown protein		1	10	10	10	36.3	36.3	36.3	25.879	234	17.0512	17.1215	17.1251	17.0993	17.2537	17.3216	17.3021	17.2925	1.14328	0.00391226
slr0108	slr0108	1	1	1	slr0108 unknown protein		1	1	1	1	4.8	4.8	4.8	47.079	418	12.7313	12.8155	12.8523	12.7997	12.7042	12.7626	12.6389	12.7019	0.93445	0.125342
slr0110	slr0110	7	7	7	slr0110 hypothetical protein		1	7	7	7	41.2	41.2	41.2	23.086	211	17.0876	17.0372	17.0928	17.0725	17.164	17.0678	17.0926	17.1081	1.02497	0.363599
slr0111	slr0111	7	7	7	slr0111 unknown protein		1	7	7	7	28.9	28.9	28.9	19.377	173	16.9321	16.9189	16.8994	16.9168	16.8639	16.8778	16.8692	16.8703	0.968298	0.0256392
slr0112	slr0112	4	4	4	slr0112 unknown protein		1	4	4	4	21.6	21.6	21.6	19.219	185	14.7683	14.9415	14.7754	14.8284	14.7955	14.7843	14.9056	14.8285	1.00008	0.998731
slr0114	slr0114	6	6	6	slr0114 putative PP2C-type protein phosphatase		1	6	6	6	9.8	9.8	9.8	56.722	510	16.5387	16.5265	16.5614	16.5422	16.3675	16.4002	16.4161	16.3946	0.90276	0.00168106
slr0115	slr0115	4	4	4	slr0115 response regulator for energy transfer from phycobilisomes to photosystems		1	4	4	4	18.7	18.7	18.7	27.276	241	14.9924	14.9374	14.9572	14.9623	14.8697	14.8786	14.7611	14.8365	0.916472	0.062732
slr0116	slr0116	7	7	7	slr0116 phycocyanobilin:ferredoxin oxidoreductase		1	7	7	7	23.8	23.8	23.8	28.129	248	16.8262	16.7918	16.9082	16.8421	16.7822	16.8193	16.7752	16.7922	0.966015	0.284013
slr0118	slr0118	20	20	20	slr0118 thiamine biosynthesis protein ThiC		1	20	20	20	44.2	44.2	44.2	51.137	459	18.3112	18.3284	18.3958	18.3451	18.3347	18.3632	18.3526	18.3502	1.00352	0.86619
slr0120	slr0120	3	3	3	slr0120 probable tRNA/rRNA methyltransferase		1	3	3	3	12.1	12.1	12.1	26.916	240	15.4974	15.516	15.5694	15.5276	15.6012	15.6441	15.6083	15.6179	1.06456	0.0319164
slr0121	slr0121	4	4	4	slr0121 hypothetical protein		1	4	4	4	8.5	8.5	8.5	52.995	495	15.5657	15.6838	15.7145	15.6546	15.9865	15.9878	16.0215	15.9986	1.26925	0.0128203
slr0143	slr0143	2	2	2	slr0143 WD-repeat protein, Hat protein, involved in the control of a high-affinity transport system for inorganic carbon		1	2	2	2	1.3	1.3	1.3	131.91	1191	13.1371	13.2019	13.1392	13.1594	13.2695	13.2896	13.2508	13.27	1.07967	0.0187954
slr0144	slr0144	4	4	4	slr0144 hypothetical protein		1	4	4	4	21	21	21	29.599	262	16.2046	16.0897	16.0223	16.1056	16.0542	15.8822	15.9498	15.962	0.905317	0.121139
slr0145	slr0145	4	4	4	slr0145 unknown protein		1	4	4	4	32.4	32.4	32.4	15.045	136	14.467	14.3945	14.458	14.4398	14.4459	14.1685	14.2981	14.3042	0.910258	0.227674
slr0146	slr0146	3	3	3	slr0146 hypothetical protein		1	3	3	3	24.7	24.7	24.7	19.69	170	14.9182	15.1129	15.0128	15.0146	14.9463	14.9385	14.9114	14.9321	0.94438	0.278026
slr0147	slr0147	8	8	8	slr0147 hypothetical protein		1	8	8	8	38.5	38.5	38.5	24.358	221	16.0579	16.0051	15.9672	16.01	15.9475	15.9475	15.9747	15.9566	0.963622	0.169854
slr0148	slr0148	7	7	7	slr0148 hypothetical protein		1	7	7	7	36.2	36.2	36.2	17.823	160	17.5069	17.4823	17.5562	17.5151	17.5313	17.5344	17.4798	17.5151	1.00001	0.999633
slr0149	slr0149	10	10	10	slr0149 hypothetical protein		1	10	10	10	50.6	50.6	50.6	18.386	156	16.5631	16.6544	16.5189	16.5788	16.292	16.4348	16.407	16.3779	0.870021	0.0278004
slr0150	slr0150	3	3	3	slr0150 ferredoxin, petF-like protein		1	3	3	3	31.1	31.1	31.1	10.793	103	16.1865	16.3539	16.0887	16.2097	15.932	16.2312	16.1513	16.1048	0.929906	0.426483
slr0151	slr0151	12	12	12	slr0151 unknown protein		1	12	12	12	44.4	44.4	44.4	34.915	320	17.7181	17.7456	17.772	17.7452	17.5731	17.6247	17.6044	17.6007	0.904702	0.00262398
slr0152	slr0152	4	4	4	slr0152 serine/threonine protein kinase		1	4	4	4	5.9	5.9	5.9	70.659	631	14.9346	15.0136	14.959	14.9691	14.9149	14.9362	14.8762	14.9091	0.959268	0.114577
slr0156	slr0156	34	27	27	slr0156 ClpB protein		1	34	27	27	38.9	32.4	32.4	101.39	898	18.1008	18.0983	18.1761	18.1251	18.1758	18.1599	18.157	18.1642	1.02752	0.261964
slr0161	slr0161	11	11	11	slr0161 twitching motility protein PilT		1	11	11	11	30.9	30.9	30.9	40.615	369	17.4973	17.5219	17.5407	17.52	17.6795	17.6303	17.6153	17.6417	1.08804	0.00943396
slr0162	slr0162	4	4	4	slr0162 a part of pilC, pilin biogenesis protein, required for twitching motility		1	4	4	4	32.7	32.7	32.7	17.776	165	14.8447	14.8036	14.89	14.8461	15.0098	14.8871	14.882	14.9263	1.05718	0.1904
slr0163	slr0163	3	3	3	slr0163 a part of pilC, pilin biogenesis protein, required for twitching motility		1	3	3	3	16.6	16.6	16.6	26.764	247	14.6157	14.5581	14.5762	14.5833	14.7538	14.7256	14.6485	14.7093	1.09123	0.0372919
slr0164	slr0164	8	8	8	slr0164 ATP-dependent Clp protease proteolytic subunit		1	8	8	8	42.7	42.7	42.7	24.881	225	16.8839	16.8834	16.8613	16.8762	16.8817	16.8115	16.8127	16.8353	0.972028	0.213592
slr0165	slr0165	12	12	11	slr0165 ATP-dependent Clp protease proteolytic subunit		1	12	12	11	49	49	44.1	22.397	202	18.8502	18.7953	18.6584	18.7679	18.9745	18.9316	18.8741	18.9267	1.11635	0.089987
slr0168	slr0168	7	7	7	slr0168 unknown protein		1	7	7	7	15.6	15.6	15.6	68.369	643	16.4289	16.3854	16.4633	16.4258	16.5078	16.4863	16.5323	16.5088	1.05918	0.045391
slr0169	slr0169	6	6	6	slr0169 hypothetical protein		1	6	6	6	25.4	25.4	25.4	22.745	213	17.2409	17.2696	17.2721	17.2609	17.1477	17.2092	17.1538	17.1703	0.939108	0.0261416
slr0171	slr0171	4	4	4	slr0171 photosystem I assembly related protein Ycf37		1	4	4	4	22.9	22.9	22.9	20.137	175	16.206	16.1715	16.2048	16.1941	16.2696	16.2524	16.2554	16.2592	1.04614	0.015781
slr0172	slr0172	6	6	6	slr0172 hypothetical protein		1	6	6	6	51	51	51	17.27	155	17.4208	17.4986	17.4803	17.4666	17.4285	17.4919	17.4627	17.461	0.996143	0.861159
slr0179	slr0179	1	1	1	slr0179 hypothetical protein		1	1	1	1	2.2	2.2	2.2	40.411	357	14.4769	14.4279	14.5537	14.4862	14.5392	14.5813	14.4495	14.5234	1.02611	0.524566
slr0181	slr0181	2	2	2	slr0181 hypothetical protein		1	2	2	2	6.2	6.2	6.2	29.414	260	13.1782	12.9684	13.2787	13.1418	13.1614	13.1329	13.3789	13.2244	1.05895	0.529743
slr0184	slr0184	4	4	4	slr0184 unknown protein		1	4	4	4	19.4	19.4	19.4	23.734	206	14.0624	14.1099	14.1135	14.0953	14.0097	14.1288	14.1315	14.09	0.99639	0.912816
slr0185	slr0185	8	8	8	slr0185 orotate phosphoribosyltransferase		1	8	8	8	43.4	43.4	43.4	21.372	198	17.9913	17.8985	17.6734	17.8544	17.92	17.8037	17.7522	17.8253	0.980012	0.802315
slr0186	slr0186	18	18	18	slr0186 2-isopropylmalate synthase		1	18	18	18	45.4	45.4	45.4	57.413	533	18.0447	18.0347	17.9348	18.0047	17.9558	17.9249	17.9905	17.9571	0.96752	0.316207
slr0191	slr0191	12	12	12	slr0191 amidase enhancer, periplasmic protein		1	12	12	12	24.9	24.9	24.9	59.327	535	16.2134	16.2343	16.2806	16.2428	16.2897	16.3231	16.27	16.2942	1.03633	0.114652
slr0192	slr0192	3	3	3	slr0192 hypothetical protein		1	3	3	3	27.2	27.2	27.2	12.766	114	13.9725	14.0475	13.824	13.948	13.8018	13.898	13.8065	13.8354	0.924952	0.223709
slr0193	slr0193	5	5	5	slr0193 RNA-binding protein		1	5	5	5	50.3	50.3	50.3	16.616	151	17.5922	17.5937	17.5241	17.57	17.4194	17.4605	17.4909	17.4569	0.924603	0.0220523
slr0194	slr0194	10	10	10	slr0194 ribose 5-phosphate isomerase		1	10	10	10	41.3	41.3	41.3	24.752	235	18.3154	18.3302	18.3901	18.3452	18.3339	18.3191	18.3513	18.3348	0.99279	0.703979
slr0197	slr0197	9	9	9	slr0197 competence protein		1	9	9	9	14.8	14.8	14.8	61.255	553	16.8682	16.8915	16.8274	16.8624	16.7887	16.8953	16.8277	16.8372	0.982711	0.534594
slr0201	slr0201	7	7	7	slr0201 heterodisulfide reductase subunit B		1	7	7	7	25.2	25.2	25.2	32.571	301	16.6114	16.5351	16.5713	16.5726	16.6748	16.5737	16.5768	16.6084	1.02516	0.426309
slr0207	slr0207	10	10	10	slr0207 hypothetical protein		1	10	10	10	18	18	18	62.713	540	16.0311	16.0654	16.2052	16.1005	16.0463	16.0644	16.0832	16.0646	0.975424	0.572074
slr0208	slr0208	6	6	6	slr0208 hypothetical protein		1	6	6	6	34.7	34.7	34.7	29.871	259	16.5044	16.4812	16.5307	16.5054	16.5215	16.4267	16.4244	16.4575	0.967327	0.272073
slr0209	slr0209	12	12	12	slr0209 unknown protein		1	12	12	12	42.2	42.2	42.2	40.765	348	17.6713	17.6186	17.6805	17.6568	17.624	17.5779	17.643	17.615	0.971414	0.200111
slr0210	slr0210	4	4	4	slr0210 two-component sensor histidine kinase		1	4	4	4	8.9	8.9	8.9	46.789	417	16.5639	16.6861	16.5253	16.5918	16.3645	16.6509	16.5452	16.5202	0.951614	0.509639
slr0211	slr0211	7	7	7	slr0211 hypothetical protein		1	7	7	7	19.1	19.1	19.1	46.145	403	15.9158	15.9591	16.0711	15.982	16.0999	16.0947	16.1666	16.1204	1.10068	0.076892
slr0212	slr0212	30	30	30	slr0212 5-methyltetrahydrofolate--homocysteine methyltransferase		1	30	30	30	27.4	27.4	27.4	132.54	1195	19.1109	19.0593	19.057	19.0758	19.0166	19.0111	18.9504	18.9927	0.944074	0.0411418
slr0213	slr0213	11	11	11	slr0213 GMP synthetase		1	11	11	11	25.8	25.8	25.8	61.008	542	16.7449	16.8	16.7576	16.7675	16.638	16.7175	16.7278	16.6944	0.950596	0.106363
slr0220	slr0220	25	25	25	slr0220 glycyl-tRNA synthetase beta chain		1	25	25	25	35.6	35.6	35.6	80.05	722	18.6012	18.5499	18.6376	18.5962	18.5112	18.4663	18.473	18.4835	0.924837	0.0284136
slr0222	slr0222	11	11	11	slr0222 two-component hybrid sensor and regulator		1	11	11	11	8.9	8.9	8.9	134.97	1178	17.018	17.0205	17.002	17.0135	16.9753	17.0274	17.0237	17.0088	0.996734	0.810952
slr0226	slr0226	9	9	9	slr0226 unknown protein		1	9	9	9	27.4	27.4	27.4	50.848	482	16.729	16.705	16.6568	16.6969	16.5196	16.5771	16.6699	16.5889	0.927834	0.116376
slr0228	slr0228	21	21	20	slr0228 cell division protein FtsH		1	21	21	20	34.6	34.6	32.4	68.495	627	18.9469	18.9561	18.9263	18.9431	18.9381	18.9693	18.9634	18.9569	1.00965	0.34639
slr0229	slr0229	4	4	4	slr0229 3-hydroxyisobutyrate dehydrogenase		1	4	4	4	15.9	15.9	15.9	29.93	290	14.4465	14.3726	14.323	14.3807	14.1336	14.145	14.1244	14.1343	0.843025	0.0183606
slr0232	slr0232	1	1	1	slr0232 hypothetical protein		1	1	1	1	5	5	5	23.781	218	12.1679	12.1988	12.1917	12.1861	12.2372	12.356	12.3518	12.315	1.09344	0.0731557
slr0233	slr0233	3	3	3	slr0233 thioredoxin M		1	3	3	3	26.7	26.7	26.7	11.802	105	13.8365	13.592	13.9948	13.8078	13.9134	13.6824	13.7038	13.7665	0.971824	0.783217
slr0236	slr0236	3	3	3	slr0236 similar to glutathione S-transferase		1	3	3	3	20.7	20.7	20.7	25.007	222	13.6244	13.715	13.5505	13.63	13.5837	13.6237	13.5068	13.5714	0.960232	0.380025
slr0237	slr0237	11	11	10	slr0237 glycogen operon protein GlgX homolog		1	11	11	10	14.6	14.6	13.5	83.5	746	17.1837	17.1679	17.1358	17.1625	17.1736	17.1729	17.1921	17.1795	1.01189	0.356394
slr0238	slr0238	3	3	3	slr0238 hypothetical protein		1	3	3	3	15.7	15.7	15.7	15.538	140	14.5278	14.5215	14.6277	14.559	14.7105	14.6311	14.775	14.7055	1.10692	0.0553106
slr0239	slr0239	3	3	3	slr0239 precorrin-4 C11-methyltransferase		1	3	3	3	18.6	18.6	18.6	28.769	264	13.9259	13.9022	13.9625	13.9302	14.0049	13.8728	14.0361	13.9713	1.02887	0.505833
slr0242	slr0242	5	5	5	slr0242 bacterioferritin comigratory protein homolog		1	5	5	5	45	45	45	17.584	160	15.8633	15.9379	15.9808	15.9273	15.9057	15.9062	15.9443	15.9187	0.994054	0.831827
slr0244	slr0244	13	13	13	slr0244 hypothetical protein		1	13	13	13	54.2	54.2	54.2	31.204	284	18.3834	18.4183	18.4911	18.431	18.335	18.3906	18.3312	18.3523	0.946921	0.116016
slr0245	slr0245	5	5	5	slr0245 Histone deacetylase family protein		1	5	5	5	25.3	25.3	25.3	33.649	304	14.0905	14.0993	14.2464	14.1454	14.2834	14.2365	14.2528	14.2576	1.08084	0.149116
slr0249	slr0249	1	1	1	slr0249 hypothetical protein		1	1	1	1	7.3	7.3	7.3	14.032	124	11.3648	11.4488	11.5873	11.467	11.5363	11.7134	11.5232	11.591	1.08974	0.237345
slr0250	slr0250	4	4	4	slr0250 hypothetical protein		1	4	4	4	30.3	30.3	30.3	19.183	178	14.9264	14.881	14.7353	14.8476	14.9295	14.8529	14.8884	14.8903	1.03003	0.546289
slr0251	slr0251	6	6	6	slr0251 ATP-binding protein of ABC transporter		1	6	6	6	33.3	33.3	33.3	27.861	252	15.2195	15.2122	15.1698	15.2005	15.265	15.1144	15.1751	15.1848	0.989212	0.762404
slr0254	slr0254	3	3	3	slr0254 hypothetical protein		1	3	3	3	13.5	13.5	13.5	30.393	266	13.5026	13.5491	13.4785	13.5101	13.6068	13.6482	13.612	13.6223	1.08092	0.0150069
slr0257	slr0257	4	4	4	slr0257 periplasmic carboxyl-terminal protease		1	4	4	4	7.1	7.1	7.1	50.345	462	14.9174	14.9508	14.971	14.9464	15.0588	15.0935	15.1099	15.0874	1.10266	0.00291111
slr0260	slr0260	5	5	5	slr0260 cob(I)alamin adenosyltransferase		1	5	5	5	24.1	24.1	24.1	22.645	203	15.9601	16.028	15.9583	15.9821	15.6944	15.9586	15.881	15.8447	0.909106	0.215963
slr0261	slr0261	15	15	15	slr0261 NADH dehydrogenase subunit 7		1	15	15	15	39.8	39.8	39.8	44.347	384	17.9879	18.0201	17.9258	17.978	18.0992	18.098	18.0941	18.0971	1.08608	0.0495549
slr0262	slr0262	1	1	1	slr0262 unknown protein		1	1	1	1	8.2	8.2	8.2	14.505	134	15.2757	15.2183	15.3011	15.265	15.2287	15.2117	15.2295	15.2233	0.971486	0.226506
slr0264	slr0264	1	1	1	slr0264 hypothetical protein		1	1	1	1	2.4	2.4	2.4	41.029	369	15.0967	15.2918	14.7714	15.0533	14.7462	15.3789	15.1467	15.0906	1.02619	0.883898
slr0267	slr0267	3	3	3	slr0267 hypothetical protein		1	3	3	3	9.3	9.3	9.3	31.201	279	14.9688	14.8984	14.9982	14.9551	15.0065	14.9264	14.9703	14.9677	1.00878	0.754982
slr0270	slr0270	2	2	2	slr0270 hypothetical protein		1	2	2	2	16	16	16	12.566	106	12.1124	12.1424	12.1258	12.1269	12.2635	12.1719	12.1252	12.1869	1.04246	0.275681
slr0280	slr0280	16	16	16	slr0280 hypothetical protein		1	16	16	16	34.6	34.6	34.6	65.405	610	17.0785	17.1301	17.1603	17.123	17.0853	17.1512	17.1154	17.1173	0.996081	0.862207
slr0287	slr0287	7	7	7	slr0287 hypothetical protein		1	7	7	7	42.4	42.4	42.4	13.615	118	16.3641	16.3032	16.3973	16.3549	16.3599	16.3251	16.3976	16.3609	1.00417	0.871103
slr0288	slr0288	25	25	25	slr0288 glutamate--ammonia ligase		1	25	25	25	36.9	36.9	36.9	79.209	724	19.34	19.2741	19.3154	19.3099	19.0657	19.0346	19.0031	19.0345	0.826227	0.000485587
slr0291	slr0291	2	2	2	slr0291 hypothetical protein		1	2	2	2	17.4	17.4	17.4	17.221	144	12.2471	12.3366	12.0063	12.1967	12.233	12.0606	12.2121	12.1686	0.980721	0.81862
slr0293	slr0293	11	11	11	slr0293 glycine dehydrogenase		1	11	11	11	13.7	13.7	13.7	107.32	983	16.3801	16.2978	16.2639	16.3139	16.5217	16.4441	16.4504	16.472	1.11584	0.0242407
slr0294	slr0294	5	5	5	slr0294 unknown protein		1	5	5	5	30.2	30.2	30.2	18.041	159	14.5244	14.7348	14.7328	14.664	15.2383	15.2353	15.2193	15.2309	1.48135	0.0143184
slr0298	slr0298	2	2	2	slr0298 FraH protein homolog		1	2	2	2	22.4	22.4	22.4	22.159	210	14.7291	14.9265	14.7696	14.8084	14.5518	14.8352	14.779	14.722	0.941867	0.463977
slr0300	slr0300	4	4	4	slr0300 hypothetical protein		1	4	4	4	20.6	20.6	20.6	21.945	194	15.632	15.6266	15.5862	15.6149	15.479	15.4893	15.4958	15.488	0.915791	0.00742281
slr0301	slr0301	22	22	22	slr0301 phosphoenolpyruvate synthase		1	22	22	22	26.5	26.5	26.5	89.928	818	17.9981	17.9888	17.9524	17.9797	17.9484	17.9745	17.9618	17.9616	0.987489	0.333275
slr0303	slr0303	5	5	5	slr0303 hypothetical protein		1	5	5	5	17.1	17.1	17.1	35.264	322	15.4166	15.4883	15.6458	15.5169	15.5854	15.6183	15.6401	15.6146	1.07008	0.283493
slr0304	slr0304	1	1	1	slr0304 hypothetical protein		1	1	1	1	3.3	3.3	3.3	37.905	336	12.6273	12.6398	12.6411	12.6361	12.4374	12.4846	12.7242	12.5487	0.941261	0.429051
slr0306	slr0306	1	1	1	slr0306 unknown protein		1	1	1	1	1.4	1.4	1.4	55.3	506	11.9886	12.1296	12.2861	12.1348	12.3566	12.3433	12.1212	12.2737	1.10108	0.294181
slr0309	slr0309	4	4	4	slr0309 probable methyltransferase		1	4	4	4	8.9	8.9	8.9	54.476	473	14.0328	14.0384	14.2051	14.0921	13.9202	13.9465	13.9559	13.9409	0.900473	0.11115
slr0312	slr0312	6	6	6	slr0312 two-component response regulator NarL subfamily		1	6	6	6	24.9	24.9	24.9	22.752	209	15.5657	15.54	15.6443	15.5833	15.5516	15.4917	15.5961	15.5465	0.974807	0.44588
slr0315	slr0315	9	9	9	slr0315 probable oxidoreductase		1	9	9	9	44.3	44.3	44.3	25.897	244	15.5767	15.5166	15.5839	15.5591	15.4579	15.4786	15.4482	15.4616	0.93466	0.0303112
slr0316	slr0316	1	1	1	slr0316 hypothetical protein		1	1	1	1	3	3	3	28.752	263	13.4272	13.3552	13.4618	13.4147	13.2821	13.3578	13.2959	13.312	0.931234	0.0632559
slr0317	slr0317	7	7	7	slr0317 hypothetical protein		1	7	7	7	31.4	31.4	31.4	31.495	287	15.1843	15.3056	15.1934	15.2277	15.185	15.2102	15.1369	15.1774	0.965675	0.337566
slr0319	slr0319	7	7	7	slr0319 beta-lactamase		1	7	7	7	27	27	27	34.777	304	14.8258	14.8989	14.9896	14.9047	15.4404	15.4082	15.4165	15.4217	1.43094	0.0064979
slr0320	slr0320	10	10	10	slr0320 hypothetical protein		1	10	10	10	18.3	18.3	18.3	60.644	531	17.2959	17.2482	17.2423	17.2621	17.1936	17.1651	17.1277	17.1621	0.933042	0.0178192
slr0321	slr0321	7	7	7	slr0321 GTP-binding protein ERA homolog		1	7	7	7	28.3	28.3	28.3	34.791	315	17.7594	17.6909	17.7046	17.7183	17.5904	17.5857	17.5396	17.5719	0.903502	0.006238
slr0322	slr0322	37	37	36	slr0322 two-component hybrid sensor and regulator		1	37	37	36	34.3	34.3	33.6	120.56	1095	18.5877	18.627	18.7134	18.6427	18.6311	18.6687	18.6667	18.6555	1.00893	0.769129
slr0323	slr0323	16	16	16	slr0323 putative alpha-mannosidase		1	16	16	16	18.9	18.9	18.9	120.44	1042	17.7988	17.7686	17.9108	17.8261	17.8938	17.796	17.8868	17.8589	1.023	0.575806
slr0325	slr0325	5	5	5	slr0325 hypothetical protein		1	5	5	5	39.8	39.8	39.8	18.346	161	14.7273	14.7526	14.6874	14.7224	14.6842	14.6004	14.6496	14.6447	0.947551	0.0688714
slr0326	slr0326	7	7	7	slr0326 hypothetical protein		1	7	7	7	46.3	46.3	46.3	16.949	147	16.8148	16.7919	16.7655	16.7907	16.8217	16.8482	16.8163	16.8287	1.02669	0.101555
slr0327	slr0327	3	3	3	slr0327 iron(III) ABC transporter, permease protein		1	3	3	3	5	5	5	61.597	557	11.9623	11.8512	11.9788	11.9308	12.4429	12.2542	12.1758	12.2909	1.28356	0.027728
slr0328	slr0328	3	3	3	slr0328 low molecular weight phosphotyrosine protein phosphatase		1	3	3	3	26.8	26.8	26.8	17.47	157	15.4126	15.3703	15.3753	15.3861	15.3485	15.3652	15.3438	15.3525	0.977011	0.111604
slr0329	slr0329	2	2	2	slr0329 glucokinase		1	2	2	2	8.6	8.6	8.6	34.607	327	12.4289	12.5206	12.5547	12.5014	12.3902	12.4356	12.4861	12.4373	0.956542	0.247336
slr0331	slr0331	3	3	3	slr0331 NADH dehydrogenase subunit 4 (involved in photosystem-1 cyclic electron flow)		1	3	3	3	8.8	8.8	8.8	57.51	525	15.5485	15.4673	15.8849	15.6336	15.7588	15.7427	15.7011	15.7342	1.07225	0.514473
slr0333	slr0333	4	4	4	slr0333 unknown protein		1	4	4	4	33	33	33	11.406	106	15.9051	15.9031	15.8262	15.8781	15.9346	15.9228	15.7888	15.882	1.00271	0.946292
slr0334	slr0334	4	4	4	slr0334 unknown protein		1	4	4	4	18.2	18.2	18.2	11.631	110	13.3401	13.3371	13.1471	13.2748	13.4519	13.4301	13.4799	13.454	1.13225	0.100373
slr0335	slr0335	52	52	52	slr0335 phycobilisome core-membrane linker polypeptide		1	52	52	52	67.3	67.3	67.3	100.29	896	21.8047	21.7812	21.7191	21.7683	21.8062	21.7784	21.77	21.7849	1.01154	0.597204
slr0337	slr0337	3	3	3	slr0337 hypothetical protein		1	3	3	3	3.8	3.8	3.8	84.193	729	14.4999	14.4771	14.3756	14.4509	14.5145	14.3737	14.4563	14.4482	0.998122	0.963657
slr0338	slr0338	11	11	11	slr0338 probable oxidoreductase		1	11	11	11	33.4	33.4	33.4	39.042	356	16.3395	16.33	16.3343	16.3346	16.5386	16.5094	16.554	16.534	1.14825	0.00311258
slr0341	slr0341	3	3	3	slr0341 unknown protein		1	3	3	3	7.9	7.9	7.9	35.076	318	13.1155	13.1335	12.9782	13.0758	13.284	13.2707	13.2154	13.2567	1.13361	0.049721
slr0342	slr0342	4	4	4	slr0342 cytochrome b6		1	4	4	4	18	18	18	25.054	222	16.2595	16.2739	16.2381	16.2572	16.5095	16.4581	16.507	16.4915	1.1764	0.00074472
slr0343	slr0343	1	1	1	slr0343 cytochrome b6-f complex subunit 4		1	1	1	1	6.2	6.2	6.2	17.444	160	15.6842	15.6548	15.8379	15.7256	15.917	15.9221	15.9107	15.9166	1.14151	0.0776667
slr0344	slr0344	4	4	4	slr0344 probable glycosyltransferase		1	4	4	4	6.8	6.8	6.8	54.301	473	15.0797	15.1555	15.0674	15.1008	15.1241	15.1809	15.098	15.1343	1.02349	0.415467
slr0345	slr0345	2	2	2	slr0345 unknown protein		1	2	2	2	14.1	14.1	14.1	15.174	135	14.749	14.683	14.5812	14.6711	14.5835	14.5225	14.4442	14.5167	0.89855	0.0736263
slr0346	slr0346	4	4	4	slr0346 ribonuclease III		1	4	4	4	18.9	18.9	18.9	27.106	244	15.831	15.8519	15.9477	15.8769	15.8052	15.7942	15.8834	15.8276	0.966438	0.344257
slr0348	slr0348	12	12	12	slr0348 hypothetical protein		1	12	12	12	32	32	32	45.581	406	17.2236	17.2616	17.2698	17.2517	17.2857	17.2862	17.2498	17.2739	1.01552	0.300551
slr0351	slr0351	4	4	4	slr0351 hypothetical protein		1	4	4	4	13.8	13.8	13.8	46.483	412	15.6118	15.6235	15.6235	15.6196	15.4569	15.6321	15.6197	15.5695	0.965903	0.468957
slr0355	slr0355	5	5	5	slr0355 hypothetical protein		1	5	5	5	15.7	15.7	15.7	35.387	331	16.1141	16.218	16.1884	16.1735	16.3689	16.3581	16.3548	16.3606	1.13846	0.0244447
slr0356	slr0356	1	1	1	slr0356 hypothetical protein		1	1	1	1	5.6	5.6	5.6	21.434	196	13.1512	13.1501	12.9875	13.0963	13.2567	13.2678	13.3065	13.277	1.13345	0.0706206
slr0357	slr0357	12	12	12	slr0357 histidyl-tRNA synthetase		1	12	12	12	36.7	36.7	36.7	49.171	447	16.8262	16.8381	16.7958	16.82	16.8914	16.9039	16.8579	16.8844	1.04563	0.0261976
slr0358	slr0358	4	4	4	slr0358 unknown protein		1	4	4	4	13.1	13.1	13.1	42.416	374	14.1975	14.3393	14.3086	14.2818	14.4014	14.3549	14.3844	14.3802	1.07062	0.139913
slr0359	slr0359	4	4	4	slr0359 hypothetical protein		1	4	4	4	3.1	3.1	3.1	141.66	1244	12.441	12.6524	12.3911	12.4948	12.6007	12.5316	12.7959	12.6428	1.10801	0.259068
slr0360	slr0360	1	1	1	slr0360 hypothetical protein		1	1	1	1	1.5	1.5	1.5	56.728	535	11.9255	11.9069	11.9065	11.913	12.0425	12.0373	11.9248	12.0015	1.06329	0.144264
slr0361	slr0361	5	5	5	slr0361 probable ribosomal large subunit pseudouridine synthase B		1	5	5	5	20.9	20.9	20.9	28.228	249	15.1288	15.1203	15.0484	15.0991	14.8434	14.9857	14.8732	14.9007	0.871508	0.0252101
slr0362	slr0362	3	3	3	slr0362 hypothetical protein		1	3	3	3	17.8	17.8	17.8	19.356	174	15.3333	15.5541	15.4167	15.4347	17.3826	15.3986	15.5352	16.1055	1.59187	0.404557
slr0363	slr0363	2	2	2	slr0363 hypothetical protein		1	2	2	2	16.2	16.2	16.2	21.664	191	13.0438	12.8563	12.8757	12.9253	13.1256	13.049	13.0446	13.0731	1.10786	0.115852
slr0364	slr0364	7	7	7	slr0364 hypothetical protein		1	7	7	7	3.3	3.3	3.3	308.79	3029	14.7289	14.814	14.8551	14.7993	15.2306	15.2495	15.1791	15.2197	1.3383	0.00177759
slr0366	slr0366	8	8	8	slr0366 unknown protein		1	8	8	8	5.2	5.2	5.2	179.71	1742	16.0337	16.0507	16.0572	16.0472	16.3989	16.2911	16.3069	16.3323	1.21849	0.0110209
slr0369	slr0369	10	10	10	slr0369 RND multidrug efflux transporter		1	10	10	10	12.8	12.8	12.8	111.91	1030	16.6131	16.6079	16.5977	16.6063	16.5262	16.5576	16.5461	16.5433	0.957279	0.00930344
slr0370	slr0370	9	9	9	slr0370 succinate-semialdehyde dehydrogenase (NADP+)		1	9	9	9	25.6	25.6	25.6	48.748	454	16.4477	16.4761	16.5091	16.4777	16.3982	16.4399	16.4366	16.4249	0.964091	0.0814475
slr0373	slr0373	1	1	1	slr0373 hypothetical protein		1	1	1	1	7.9	7.9	7.9	14.044	126	11.5462	11.5116	11.7309	11.5963	11.6846	11.6913	11.7203	11.6987	1.0736	0.269785
slr0374	slr0374	22	22	22	slr0374 hypothetical protein		1	22	22	22	43.1	43.1	43.1	56.441	501	19.0214	18.9242	18.8852	18.9436	19.0354	18.976	18.9508	18.9874	1.03081	0.419534
slr0376	slr0376	5	5	5	slr0376 hypothetical protein		1	5	5	5	44.8	44.8	44.8	12.857	116	15.9661	16.0536	16.0455	16.0218	16.4178	16.1779	16.154	16.2499	1.17136	0.101698
slr0377	slr0377	3	3	3	slr0377 unknown protein		1	3	3	3	9.3	9.3	9.3	45.914	409	13.0733	13.0373	12.9363	13.0156	13.3261	13.0781	13.2262	13.2101	1.14433	0.0958897
slr0378	slr0378	6	6	6	slr0378 similar to 7-beta-(4-carbaxybutanamido)cephalosporanic acid acylase		1	6	6	6	11.5	11.5	11.5	77.955	704	14.3735	14.2351	14.3974	14.3353	14.56	14.2988	14.2979	14.3856	1.03543	0.650448
slr0379	slr0379	4	4	4	slr0379 thymidylate kinase		1	4	4	4	24.6	24.6	24.6	26.758	236	14.5997	14.6085	14.7284	14.6455	14.5447	14.4942	14.3862	14.475	0.888532	0.0533195
slr0380	slr0380	5	5	5	slr0380 hypothetical protein		1	5	5	5	13.1	13.1	13.1	50.62	459	15.0658	15.0824	15.1785	15.1089	14.6615	14.7754	14.7953	14.7441	0.776543	0.00286416
slr0381	slr0381	4	4	4	slr0381 lactoylglutathione lyase		1	4	4	4	49.6	49.6	49.6	14.665	131	16.3781	16.3818	16.4516	16.4039	16.4916	16.4661	16.4377	16.4652	1.0434	0.109326
slr0383	slr0383	2	2	2	slr0383 hypothetical protein		1	2	2	2	8.6	8.6	8.6	21.044	186	14.4037	14.3174	14.2901	14.3371	14.3781	14.3354	14.2039	14.3058	0.978552	0.647538
slr0384	slr0384	6	6	6	slr0384 sulfoquinovosyldiacylglycerol biosynthesis protein SqdX		1	6	6	6	14.3	14.3	14.3	41.451	378	15.5354	15.6481	15.5867	15.5901	15.7289	15.8366	15.8587	15.8081	1.16313	0.0147094
slr0386	slr0386	12	12	12	slr0386 unknown protein		1	12	12	12	28.9	28.9	28.9	46.743	412	16.4468	16.4548	16.4184	16.44	16.4549	16.5034	16.5112	16.4898	1.03515	0.086718
slr0387	slr0387	7	7	7	slr0387 cysteine desulfurase NifS		1	7	7	7	21.5	21.5	21.5	41.682	386	15.3094	15.2929	15.403	15.3351	15.3286	15.3047	15.2535	15.2956	0.972987	0.39642
slr0388	slr0388	4	4	4	slr0388 hypothetical protein		1	4	4	4	18.3	18.3	18.3	25.62	224	12.8119	12.8642	13.1929	12.9563	13.0071	13.0068	12.9855	12.9998	1.03059	0.750528
slr0394	slr0394	17	17	17	slr0394 phosphoglycerate kinase		1	17	17	17	46	46	46	41.67	400	20.0057	20.0044	20.0188	20.0097	20.0752	20.0586	20.1039	20.0792	1.04942	0.0242948
slr0395	slr0395	3	3	3	slr0395 nitrate assimilation transcriptional activator, LysR family protein		1	3	3	3	12.9	12.9	12.9	34.847	309	11.5398	11.4247	11.7076	11.5573	11.568	11.4621	11.5457	11.5253	0.978013	0.743735
slr0397	slr0397	6	6	6	slr0397 hypothetical protein		1	6	6	6	42.4	42.4	42.4	21.05	191	15.338	15.3421	15.2646	15.3149	15.264	15.2689	15.2942	15.2757	0.973192	0.2561
slr0398	slr0398	4	4	4	slr0398 unknown protein		1	4	4	4	27.4	27.4	27.4	17.633	157	16.9836	17.0175	17.1154	17.0389	17.0627	17.0437	17.04	17.0488	1.00692	0.826166
slr0399	slr0399	12	12	12	slr0399 chaperon-like protein for quinone binding in photosystem II		1	12	12	12	36.2	36.2	36.2	36.519	326	17.8893	17.9066	17.9329	17.9096	17.9463	17.9267	17.9387	17.9372	1.01934	0.148362
slr0400	slr0400	1	1	1	slr0400 hypothetical protein		1	1	1	1	5.9	5.9	5.9	33.397	305	11.0462	11.3703	11.4671	11.2945	11.064	11.1837	10.9767	11.0748	0.858709	0.221054
slr0401	slr0401	4	4	4	slr0401 periplasmic polyamine-binding protein of ABC transporter		1	4	4	4	8.9	8.9	8.9	43.406	384	16.7549	16.7592	16.7278	16.7473	17.0475	17.0218	17.0231	17.0308	1.21714	3.10251e-05
slr0402	slr0402	2	2	2	slr0402 hypothetical protein		1	2	2	2	11.9	11.9	11.9	21.188	194	13.7609	13.9143	13.8335	13.8362	13.861	13.8634	13.7936	13.8393	1.00215	0.954417
slr0404	slr0404	7	7	7	slr0404 hypothetical protein		1	7	7	7	27.6	27.6	27.6	34.864	333	16.0685	15.9118	16.5074	16.1626	16.1263	16.1918	16.8141	16.3774	1.16055	0.491025
slr0406	slr0406	4	4	4	slr0406 dihydroorotase		1	4	4	4	11.7	11.7	11.7	38.126	342	15.0233	15.0968	15.1628	15.0943	15.084	15.0782	15.1298	15.0973	1.00209	0.949561
slr0407	slr0407	3	3	3	slr0407 hypothetical protein		1	3	3	3	13.3	13.3	13.3	30.585	270	13.89	13.7691	13.9712	13.8768	13.8197	13.7588	13.809	13.7958	0.945443	0.300391
slr0408	slr0408	3	3	3	slr0408 unknown protein		1	3	3	3	0.8	0.8	0.8	442.44	4199	13.6818	13.5862	13.6797	13.6492	13.73	13.7902	14.3088	13.943	1.22584	0.248938
slr0415	slr0415	6	6	6	slr0415 Na+/H+ antiporter		1	6	6	6	8	8	8	75.547	698	16.0972	16.1324	16.1753	16.135	16.2358	16.1738	16.1101	16.1732	1.02689	0.430353
slr0416;sll1630	slr0416	6;1	6;1	6;1	slr0416 unknown protein		2	6	6	6	44.5	44.5	44.5	16.354	146	15.4393	15.4303	15.3461	15.4052	15.3179	15.2851	15.3501	15.3177	0.941139	0.0788284
slr0417	slr0417	25	25	24	slr0417 DNA gyrase subunit A		1	25	25	24	26.9	26.9	25.9	95.072	860	18.759	18.736	18.8059	18.7669	18.6275	18.587	18.6131	18.6092	0.896428	0.00570623
slr0418	slr0418	4	4	4	slr0418 putative transcripton factor DevT homolog		1	4	4	4	11.9	11.9	11.9	33.767	303	15.6756	15.8383	15.9312	15.8151	15.6675	15.8326	15.7638	15.7546	0.958975	0.539273
slr0420	slr0420	8	8	8	slr0420 hypothetical protein		1	8	8	8	41.4	41.4	41.4	24.472	227	16.665	16.7424	16.7469	16.7181	16.9536	17.0581	16.9984	17.0033	1.21862	0.00223254
slr0421	slr0421	2	2	2	slr0421 unknown protein		1	2	2	2	12	12	12	27.534	249	11.9645	12.1179	12.1994	12.094	12.0641	11.9207	12.0248	12.0032	0.939022	0.336758
slr0426	slr0426	14	14	14	slr0426 GTP cyclohydrolase I		1	14	14	14	65.4	65.4	65.4	26.639	234	18.0058	18.0485	18.0633	18.0392	18.1634	18.2312	18.2458	18.2135	1.12839	0.00689779
slr0427	slr0427	6	6	6	slr0427 putative competence-damage protein		1	6	6	6	16.8	16.8	16.8	44.707	416	14.8251	14.8353	14.7922	14.8175	14.948	14.831	14.9331	14.904	1.06178	0.131376
slr0431	slr0431	5	5	5	slr0431 hypothetical protein		1	5	5	5	26.8	26.8	26.8	27.011	250	15.349	15.4052	15.2622	15.3388	15.4122	15.3853	15.351	15.3828	1.03099	0.409001
slr0434	slr0434	9	9	9	slr0434 elongation factor P		1	9	9	9	51.3	51.3	51.3	20.406	187	17.2634	17.3063	17.386	17.3186	17.3329	17.3379	17.337	17.3359	1.01209	0.676916
slr0435	slr0435	5	5	5	slr0435 biotin carboxyl carrier protein of acetyl-CoA carboxylase		1	5	5	5	55.8	55.8	55.8	16.313	154	16.726	16.7599	16.8074	16.7644	16.8101	16.8277	16.8012	16.813	1.03422	0.167249
slr0436	slr0436	8	8	8	slr0436 carbon dioxide concentrating mechanism protein CcmO		1	8	8	8	31	31	31	32.296	297	16.0879	16.1487	16.1979	16.1448	16.2191	16.199	16.2393	16.2191	1.05283	0.132655
slr0438	slr0438	2	2	2	slr0438 hypothetical protein		1	2	2	2	16.8	16.8	16.8	11.391	107	14.2608	14.2726	14.2428	14.2587	14.4084	14.3807	14.5889	14.4593	1.14914	0.0891323
slr0439	slr0439	9	9	9	slr0439 unknown protein		1	9	9	9	22.2	22.2	22.2	54.61	501	16.3352	16.3707	16.2969	16.3343	16.3674	16.3747	16.3887	16.3769	1.02998	0.176103
slr0440	slr0440	6	6	6	slr0440 hypothetical protein		1	6	6	6	26.6	26.6	26.6	30.336	267	15.1048	15.0011	14.7364	14.9474	14.9995	14.9233	14.9181	14.947	0.999689	0.997158
slr0442	slr0442	20	20	20	slr0442 unknown protein		1	20	20	20	38.5	38.5	38.5	62.907	611	18.4185	18.4056	18.4691	18.4311	18.4452	18.4227	18.4464	18.4381	1.00489	0.760798
slr0443	slr0443	3	3	3	slr0443 hypothetical protein		1	3	3	3	25.6	25.6	25.6	14.608	125	14.5161	14.4364	14.138	14.3635	14.4915	14.3218	14.3678	14.3937	1.02117	0.826879
slr0444	slr0444	12	12	12	slr0444 3-phosphoshikimate 1-carboxyvinyltransferase		1	12	12	12	44	44	44	43.702	416	17.9204	17.904	17.9647	17.9297	17.9683	17.9714	17.9724	17.9707	1.02885	0.151223
slr0445	slr0445	3	3	3	slr0445 hypothetical protein		1	3	3	3	20	20	20	23.796	210	14.513	14.5294	14.4061	14.4829	14.5422	14.5412	14.433	14.5055	1.01579	0.691693
slr0446	slr0446	5	5	5	slr0446 DNA polymerase III delta subunit		1	5	5	5	16.9	16.9	16.9	35.957	319	13.3797	13.4793	13.5006	13.4532	13.4275	13.4861	13.5741	13.4959	1.03004	0.49335
slr0447	slr0447	19	19	19	slr0447 periplasmic protein, ABC-type urea transport system substrate-binding protein		1	19	19	19	50.4	50.4	50.4	48.359	446	17.5423	17.4941	17.5971	17.5445	17.539	17.5083	17.5513	17.5328	0.991948	0.744944
slr0448	slr0448	6	6	6	slr0448 DNA repair protein RadA		1	6	6	6	12.3	12.3	12.3	54.191	505	15.4096	15.2574	15.5299	15.399	15.2661	15.2656	15.2276	15.2531	0.903832	0.202974
slr0451	slr0451	16	16	16	slr0451 putative helicase		1	16	16	16	15	15	15	113.38	1006	17.7534	17.7421	17.8466	17.7807	17.8218	17.8226	17.825	17.8231	1.02984	0.328568
slr0452	slr0452	12	12	12	slr0452 dihydroxyacid dehydratase		1	12	12	12	28	28	28	58.646	561	18.7454	18.7113	18.7091	18.7219	18.6784	18.6505	18.6379	18.6556	0.955089	0.0168211
slr0453	slr0453	31	31	31	slr0453 hypothetical protein		1	31	31	31	47.7	47.7	47.7	92.447	821	19.0928	19.0914	19.111	19.0984	19.0386	19.047	19.0516	19.0458	0.964193	0.00412663
slr0454	slr0454	11	11	11	slr0454 RND multidrug efflux transporter		1	11	11	11	12.8	12.8	12.8	95.545	890	16.2896	16.2705	16.3623	16.3075	16.1895	16.2796	16.3348	16.268	0.972988	0.485967
slr0455	slr0455	10	10	10	slr0455 hypothetical protein		1	10	10	10	64.6	64.6	64.6	14.5	130	18.1184	18.1111	18.0263	18.0853	18.0607	18.0369	17.986	18.0278	0.96097	0.2001
slr0457	slr0457	1	1	1	slr0457 tRNA pseudouridine synthase B		1	1	1	1	3.4	3.4	3.4	32.113	296	11.1469	11.186	11.4585	11.2638	11.3585	11.4254	11.4345	11.4062	1.10371	0.281115
slr0459	slr0459	4	4	4	slr0459 hypothetical protein		1	4	4	4	12.4	12.4	12.4	52.307	474	13.0855	13.2929	13.2015	13.1933	13.2156	13.1869	13.3286	13.2437	1.03555	0.536482
slr0467	slr0467	7	7	7	slr0467 conserved component of ABC transporter for natural amino acids		1	7	7	7	33.3	33.3	33.3	29.062	267	15.6503	15.6831	15.3544	15.5626	15.339	15.5915	15.5469	15.4925	0.952545	0.62111
slr0468	slr0468	9	9	9	slr0468 unknown protein		1	9	9	9	21.3	21.3	21.3	51.302	436	16.0174	16.0284	15.9842	16.01	15.8745	15.7543	15.7769	15.8019	0.86566	0.0202135
slr0469	slr0469	11	11	11	slr0469 30S ribosomal protein S4		1	11	11	11	58.9	58.9	58.9	23.183	202	18.611	18.5752	18.5472	18.5778	18.7822	18.7122	18.6937	18.7294	1.11078	0.0129907
slr0473	slr0473	11	11	11	slr0473 cyanobacterial phytochrome 1, two-component sensor histidine kinase		1	11	11	11	15.8	15.8	15.8	84.232	748	16.3326	16.3279	16.4749	16.3785	16.4024	16.4094	16.5041	16.4386	1.04256	0.368229
slr0474	slr0474	4	4	4	slr0474 two-component response regulator CheY subfamily, regulator for phytochrome 1 (Cph1)		1	4	4	4	29.3	29.3	29.3	16.609	147	15.4014	15.436	15.4434	15.4269	15.4433	15.4911	15.5608	15.4984	1.05079	0.160397
slr0476	slr0476	7	7	7	slr0476 unknown protein		1	7	7	7	52.2	52.2	52.2	14.394	136	16.6081	16.617	16.7435	16.6562	16.6635	16.6666	16.6729	16.6677	1.00798	0.817785
slr0477	slr0477	4	4	4	slr0477 phosphoribosylglycinamide formyltransferase		1	4	4	4	18	18	18	23.538	217	15.2722	15.3795	15.4745	15.3754	15.397	15.4429	15.4083	15.416	1.02857	0.562139
slr0479	slr0479	2	2	2	slr0479 hypothetical protein		1	2	2	2	9.6	9.6	9.6	28.179	240	13.7681	13.8878	13.8822	13.846	13.6856	13.7666	13.5995	13.6839	0.893732	0.0619043
slr0480	slr0480	10	10	10	slr0480 hypothetical protein YCF46		1	10	10	10	22	22	22	55.974	499	16.9589	16.9704	17.0257	16.985	16.8388	16.905	16.885	16.8763	0.927415	0.0188598
slr0482	slr0482	2	2	2	slr0482 unknown protein		1	2	2	2	12.7	12.7	12.7	28.342	252	12.7556	12.7449	12.8236	12.7747	12.5125	12.7144	12.5273	12.5847	0.876619	0.0853009
slr0483	slr0483	5	5	5	slr0483 hypothetical protein		1	5	5	5	30.2	30.2	30.2	16.885	149	17.583	17.6581	17.7295	17.6569	17.7108	17.6905	17.7045	17.7019	1.0317	0.398856
slr0484	slr0484	18	18	18	slr0484 two-component sensor histidine kinase		1	18	18	18	26.5	26.5	26.5	75.884	675	17.6681	17.6476	17.6576	17.6578	17.6606	17.6444	17.6288	17.6446	0.990935	0.305668
slr0487	slr0487	6	6	6	slr0487 hypothetical protein		1	6	6	6	33.7	33.7	33.7	18.601	163	15.9483	15.9508	15.9675	15.9555	15.9507	15.9841	16.037	15.9906	1.02459	0.29603
slr0488	slr0488	1	1	1	slr0488 virulence factor MviN homolog.		1	1	1	1	1.9	1.9	1.9	57.052	533	14.437	14.5756	14.583	14.5318	14.5733	14.6622	14.7772	14.6709	1.10119	0.143639
slr0492	slr0492	1	1	1	slr0492 O-succinylbenzoic acid-CoA ligase		1	1	1	1	2.6	2.6	2.6	55.172	497	8.8891	8.85808	9.22736	8.99152	9.13038	9.47817	9.30953	9.30603	1.24359	0.11441
slr0493	slr0493	5	5	5	slr0493 similar to mannose-1-phosphate guanylyltransferase		1	5	5	5	38.3	38.3	38.3	14.427	128	15.6777	15.6914	15.7333	15.7008	15.5815	15.5575	15.577	15.572	0.914631	0.00777526
slr0496	slr0496	2	2	2	slr0496 unknown protein		1	2	2	2	22.9	22.9	22.9	12.266	109	12.7111	12.7894	12.8032	12.7679	12.7583	12.8314	12.8162	12.802	1.02391	0.404166
slr0500	slr0500	4	4	4	slr0500 imidazoleglycerol-phosphate dehydratase		1	4	4	4	12.9	12.9	12.9	23.063	210	15.6868	15.5555	15.6151	15.6191	15.8148	15.7847	15.7904	15.7967	1.13093	0.0365365
slr0502	slr0502	10	10	10	slr0502 cobalamin synthesis protein cobW homolog		1	10	10	10	32.4	32.4	32.4	38.955	352	16.4848	16.483	16.4295	16.4658	16.4807	16.4719	16.4588	16.4705	1.00326	0.825731
slr0503	slr0503	12	12	12	slr0503 hypothetical protein YCF66		1	12	12	12	38.6	38.6	38.6	37.633	337	16.5813	16.6268	16.6191	16.6091	16.653	16.5582	16.6567	16.6226	1.00942	0.728384
slr0505	slr0505	2	2	2	slr0505 hypothetical protein		1	2	2	2	11.1	11.1	11.1	21.535	190	12.1233	12.1236	12.1902	12.1457	12.0924	11.929	11.9675	11.9963	0.901637	0.0763321
slr0506	slr0506	17	17	17	slr0506 light-dependent NADPH-protochlorophyllide oxidoreductase		1	17	17	17	56.8	56.8	56.8	36.061	322	19.2217	19.199	19.2304	19.217	19.284	19.2635	19.2468	19.2648	1.03365	0.0294403
slr0510	slr0510	3	3	3	slr0510 hypothetical protein		1	3	3	3	4.6	4.6	4.6	57.126	505	15.1299	15.1305	15.2099	15.1567	15.0941	15.1133	15.4361	15.2145	1.04086	0.658215
slr0513	slr0513	12	12	12	slr0513 iron transport system substrate-binding protein, periplasmic protein		1	12	12	12	46.5	46.5	46.5	38.155	346	17.5029	17.5903	17.5063	17.5332	17.6958	17.7486	17.7045	17.7163	1.13535	0.00978967
slr0514	slr0514	5	5	5	slr0514 unknown protein		1	5	5	5	22	22	22	28.832	264	15.068	14.9682	14.9298	14.9887	15.2391	15.2497	15.3014	15.2634	1.20978	0.0106962
slr0516	slr0516	6	6	6	slr0516 hypothetical protein		1	6	6	6	34.9	34.9	34.9	17.867	166	16.1611	16.2239	16.1101	16.165	16.2866	16.1873	16.3068	16.2602	1.06821	0.12753
slr0518	slr0518	3	3	3	slr0518 similar to alpha-L-arabinofuranosidase B		1	3	3	3	18.1	18.1	18.1	20.485	177	13.8428	13.8036	14.0308	13.8924	13.7884	13.5736	13.6839	13.682	0.864324	0.0889161
slr0519	slr0519	1	1	1	slr0519 hypothetical protein		1	1	1	1	29.7	29.7	29.7	9.9211	91	11.5573	11.4833	11.4508	11.4971	11.6292	11.5967	11.6251	11.617	1.08666	0.0514264
slr0520	slr0520	9	9	9	slr0520 phosphoribosyl formylglycinamidine synthase		1	9	9	9	50	50	50	24.428	224	16.585	16.6023	16.5748	16.5874	16.507	16.4619	16.5035	16.4908	0.935273	0.00895454
slr0523	slr0523	5	5	5	slr0523 similar to dethiobiotin synthetase		1	5	5	5	24.5	24.5	24.5	25.805	237	15.1831	15.2212	15.3802	15.2615	15.2198	15.2172	15.2206	15.2192	0.971128	0.5563
slr0525	slr0525	5	5	5	slr0525 Mg-protoporphyrin IX methyl transferase		1	5	5	5	26.5	26.5	26.5	25.08	230	16.4546	16.4993	16.3739	16.4426	16.5444	16.5356	16.5417	16.5406	1.07026	0.115548
slr0526	slr0526	4	4	4	slr0526 3-methyl-2-oxobutanoate hydroxymethyltransferase		1	4	4	4	14.6	14.6	14.6	27.786	260	15.329	15.2842	15.2704	15.2945	15.2141	15.2166	15.185	15.2052	0.939997	0.0194904
slr0527	slr0527	4	4	4	slr0527 transcription regulator ExsB homolog		1	4	4	4	27.6	27.6	27.6	24.972	232	14.4989	14.6332	14.6324	14.5882	14.2771	14.4659	14.474	14.4057	0.881182	0.0882252
slr0528	slr0528	9	9	9	slr0528 UDP-N-acetylmuramoylalanyl-D-glutamate--2, 6-diaminopimelate ligase		1	9	9	9	19	19	19	54.6	505	15.8306	15.7845	15.6893	15.7681	15.7471	15.7014	15.7368	15.7284	0.972847	0.445481
slr0529	slr0529	4	4	4	slr0529 glucosylglycerol transport system substrate-binding protein		1	4	4	4	10	10	10	46.472	421	15.5677	15.7334	16.1407	15.8139	15.7507	15.9217	15.9093	15.8606	1.03286	0.814933
slr0531	slr0531	1	1	1	slr0531 glucosylglycerol transport system permease protein		1	1	1	1	5	5	5	32.829	298	13.3395	13.3868	13.5655	13.4306	13.5839	13.4067	13.5433	13.5113	1.05753	0.410205
slr0533	slr0533	3	3	3	slr0533 two-component sensor histidine kinase		1	3	3	3	8.6	8.6	8.6	44.993	405	14.6092	14.4629	14.4679	14.5133	14.4818	14.3369	14.3395	14.3861	0.915571	0.133532
slr0534	slr0534	26	26	26	slr0534 probable transglycosylase		1	26	26	26	40.9	40.9	40.9	95.979	847	17.8386	17.8618	17.8378	17.8461	17.9093	17.9909	17.964	17.9547	1.07823	0.0350548
slr0535	slr0535	13	13	13	slr0535 protease		1	13	13	13	30.3	30.3	30.3	65.878	613	16.0061	16.0244	16.0641	16.0316	15.9887	16.0749	16.0864	16.05	1.01286	0.635833
slr0536	slr0536	10	10	10	slr0536 uroporphyrinogen decarboxylase		1	10	10	10	37.7	37.7	37.7	39.152	350	17.3922	17.4399	17.3481	17.3934	17.3842	17.3065	17.33	17.3402	0.963827	0.205853
slr0537	slr0537	9	9	9	slr0537 putative sugar kinase		1	9	9	9	33.3	33.3	33.3	35.183	333	17.6156	17.6773	17.777	17.69	17.5525	17.6329	17.6798	17.6218	0.95381	0.321752
slr0541	slr0541	2	2	2	slr0541 probable amidotransferase		1	2	2	2	8.5	8.5	8.5	25.741	236	15.7555	15.7252	15.6619	15.7142	15.6997	15.7036	15.6528	15.6854	0.980233	0.430357
slr0542	slr0542	9	9	8	slr0542 ATP-dependent protease ClpP		1	9	9	8	51.5	51.5	48	21.741	198	18.7159	18.7337	18.7286	18.726	18.7897	18.7695	18.7766	18.7786	1.0371	0.00281479
slr0543	slr0543	20	20	20	slr0543 tryptophan synthase beta subunit		1	20	20	20	47.8	47.8	47.8	45.07	412	17.8465	17.8758	17.7845	17.8356	17.8119	17.8378	17.8216	17.8238	0.991824	0.707985
slr0544	slr0544	4	4	4	slr0544 ATP-binding protein of ABC transporter		1	4	4	4	17.3	17.3	17.3	28.974	266	15.7807	15.8444	15.9543	15.8598	15.9478	15.9561	15.9894	15.9644	1.07522	0.1688
slr0545	slr0545	4	4	4	slr0545 hypothetical protein		1	4	4	4	18.5	18.5	18.5	34.632	314	14.2253	14.3032	14.2836	14.2707	14.3654	14.4587	14.3668	14.3969	1.09143	0.03448
slr0546	slr0546	9	9	9	slr0546 indole-3-glycerol phosphate synthase		1	9	9	9	30.5	30.5	30.5	32.952	295	16.729	16.7835	16.7564	16.7563	16.9673	16.8994	16.9308	16.9325	1.12992	0.00257932
slr0549	slr0549	10	10	10	slr0549 aspartate beta-semialdehyde dehydrogenese		1	10	10	10	49.1	49.1	49.1	29.512	269	17.9682	18.028	18.0163	18.0041	18.2494	18.2412	18.24	18.2435	1.1805	0.00488214
slr0550	slr0550	5	5	5	slr0550 dihydrodipicolinate synthase		1	5	5	5	19.9	19.9	19.9	31.821	301	15.5234	15.6106	15.4424	15.5255	15.9465	15.9225	15.961	15.9433	1.33597	0.0101986
slr0551	slr0551	19	19	19	slr0551 hypothetical protein		1	19	19	19	35.2	35.2	35.2	70.426	640	17.1079	17.1286	17.139	17.1252	17.2944	17.3227	17.3286	17.3152	1.14082	0.000190694
slr0552	slr0552	12	12	12	slr0552 hypothetical protein		1	12	12	12	58.2	58.2	58.2	26.721	244	18.2004	18.214	18.2412	18.2186	18.672	18.655	18.6511	18.6594	1.35738	5.61403e-05
slr0553	slr0553	8	8	8	slr0553 hypothetical protein		1	8	8	8	41.8	41.8	41.8	22.52	201	16.1076	16.0738	16.0494	16.077	16.408	16.4012	16.42	16.4097	1.25944	0.00112341
slr0556	slr0556	3	3	3	slr0556 hypothetical protein		1	3	3	3	13.3	13.3	13.3	24.038	218	14.9663	14.8791	14.9724	14.9392	15.0166	15.0209	14.9872	15.0082	1.04898	0.138067
slr0557	slr0557	25	25	25	slr0557 valyl-tRNA synthetase		1	25	25	25	39.6	39.6	39.6	102.74	910	18.5519	18.5453	18.5982	18.5651	18.538	18.5259	18.4884	18.5174	0.967499	0.100815
slr0559	slr0559	12	12	12	slr0559 periplasmic binding protein of ABC transporter for natural amino acids		1	12	12	12	44.9	44.9	44.9	46.672	454	18.1199	18.1409	18.0693	18.11	18.3114	18.2676	18.2408	18.2733	1.11978	0.0052716
slr0565	slr0565	5	5	5	slr0565 hypothetical protein		1	5	5	5	24.9	24.9	24.9	35.381	325	17.7052	17.6887	17.5962	17.6634	17.7696	17.7272	17.744	17.747	1.05966	0.120043
slr0569	slr0569	12	12	12	slr0569 unknown protein		1	12	12	12	27.2	27.2	27.2	56.747	497	17.0311	17.0306	17.09	17.0506	16.9565	16.9739	16.9932	16.9745	0.948679	0.0411168
slr0573	slr0573	1	1	1	slr0573 unknown protein		1	1	1	1	10.9	10.9	10.9	16.889	147	11.3866	11.3841	11.2941	11.3549	10.8435	11.002	10.923	10.9228	0.741171	0.00247127
slr0574	slr0574	5	5	5	slr0574 cytochrome P450		1	5	5	5	14.4	14.4	14.4	50.578	444	15.6935	15.7443	16.0039	15.8139	15.9359	15.9545	15.9695	15.9533	1.10148	0.283401
slr0575	slr0575	5	5	5	slr0575 hypothetical protein		1	5	5	5	35.3	35.3	35.3	20.32	184	15.4314	15.3758	15.5203	15.4425	15.5576	15.6103	15.6298	15.5992	1.11478	0.0455571
slr0580	slr0580	8	8	8	slr0580 aluminum resistance protein homolog		1	8	8	8	25.3	25.3	25.3	44.668	415	15.828	15.822	15.9284	15.8595	15.8352	15.7875	15.8105	15.8111	0.966986	0.295167
slr0581	slr0581	3	3	3	slr0581 unknown protein		1	3	3	3	38.2	38.2	38.2	11.781	110	15.3735	15.4007	15.3637	15.3793	15.1371	15.276	15.298	15.237	0.906097	0.0995272
slr0582	slr0582	1	1	1	slr0582 unknown protein		1	1	1	1	14.3	14.3	14.3	14.669	126	10.9545	10.7611	10.8041	10.8399	11.093	11.0664	11.1716	11.1103	1.2062	0.0257789
slr0583	slr0583	6	6	6	slr0583 similar to GDP-fucose synthetase		1	6	6	6	32.6	32.6	32.6	35.232	310	16.4927	16.4172	16.4733	16.4611	16.5305	16.4325	16.4919	16.485	1.01668	0.549599
slr0585	slr0585	21	21	21	slr0585 argininosuccinate synthetase		1	21	21	21	62.5	62.5	62.5	44.484	400	19.2234	19.1932	19.124	19.1802	19.1463	19.0956	19.0958	19.1126	0.954218	0.135019
slr0586	slr0586	6	6	6	slr0586 hypothetical protein		1	6	6	6	25.3	25.3	25.3	29.636	257	16.078	16.0779	16.123	16.093	16.3275	16.2714	16.2865	16.2951	1.15041	0.000899615
slr0587	slr0587	2	2	2	slr0587 unknown protein		1	2	2	2	45.5	45.5	45.5	11.829	110	7.36511	7.04596	8.25187	7.55431	7.75698	12.4251	7.5556	9.24588	3.23007	0.399851
slr0588	slr0588	1	1	1	slr0588 hypothetical protein		1	1	1	1	5.4	5.4	5.4	14.238	130	13.8498	13.8664	13.7941	13.8367	14.1259	14.0136	13.9491	14.0295	1.14295	0.0486767
slr0589	slr0589	1	1	1	slr0589 hypothetical protein		1	1	1	1	8.2	8.2	8.2	20.818	184	13.2254	13.1492	13.1221	13.1656	13.0854	13.1289	12.9591	13.0578	0.928044	0.159941
slr0591	slr0591	6	6	6	slr0591 ribonucleoside-diphosphate reductase beta chain		1	6	6	6	19.4	19.4	19.4	41.603	355	15.6524	15.7269	15.7173	15.6989	15.7078	15.6593	15.6525	15.6732	0.98236	0.43217
slr0593	slr0593	1	1	1	slr0593 cAMP binding membrane protein		1	1	1	1	2.8	2.8	2.8	46.226	434	13.9762	14.0113	14.1431	14.0435	13.744	13.838	13.7997	13.7939	0.841109	0.0217575
slr0594	slr0594	2	2	2	slr0594 hypothetical protein		1	2	2	2	4.9	4.9	4.9	43.055	407	15.0979	15.1474	15.2145	15.1533	15.1704	15.2215	15.226	15.2059	1.0372	0.260599
slr0596	slr0596	5	5	5	slr0596 hypothetical protein		1	5	5	5	18.7	18.7	18.7	30.223	273	16.1116	16.0444	16.3577	16.1713	16.1946	16.2148	16.1837	16.1977	1.01849	0.80779
slr0597	slr0597	21	21	21	slr0597 phosphoribosyl aminoimidazole carboxy formyl formyltransferase/inosinemonophosphate cyclohydrolase (PUR-H(J))		1	21	21	21	50.8	50.8	50.8	59.326	553	18.2001	18.2046	18.1814	18.1954	18.2027	18.2489	18.2191	18.2236	1.01975	0.161205
slr0598	slr0598	2	2	2	slr0598 hypothetical protein		1	2	2	2	19.6	19.6	19.6	11.92	102	16.026	16.1915	16.3082	16.1752	16.0213	16.2265	16.1525	16.1334	0.971412	0.703076
slr0599	slr0599	9	9	9	slr0599 serine/threonine kinase		1	9	9	9	20.4	20.4	20.4	58.141	535	17.2987	17.3032	17.3519	17.3179	17.387	17.4052	17.4138	17.402	1.06001	0.0236557
slr0600	slr0600	7	7	7	slr0600 NADP-thioredoxin reductase		1	7	7	7	27.6	27.6	27.6	35.993	326	17.3118	17.3256	17.2051	17.2809	17.2514	17.367	17.5135	17.3773	1.06914	0.339545
slr0601	slr0601	2	2	2	slr0601 unknown protein		1	2	2	2	20.3	20.3	20.3	13.48	128	13.3433	13.3814	13.5149	13.4132	13.8954	13.7499	13.7007	13.782	1.29125	0.00953232
slr0602	slr0602	3	3	3	slr0602 unknown protein		1	3	3	3	20.2	20.2	20.2	14.418	129	15.0309	15.0318	15.0379	15.0335	14.5078	14.5729	14.5523	14.5443	0.712408	0.00135789
slr0603	slr0603	11	11	11	slr0603 DNA polymerase III alpha subunit [Contains: Ssp dnaE intein]		1	11	11	11	12	12	12	101.62	897	17.0782	17.0686	17.1622	17.103	17.0562	17.0757	17.0109	17.0476	0.96233	0.204165
slr0604	slr0604	11	11	11	slr0604 GTP-binding protein		1	11	11	11	23.4	23.4	23.4	66.967	603	16.1086	16.0412	16.0319	16.0606	16.0768	16.0702	16.0955	16.0808	1.01414	0.4953
slr0605	slr0605	12	12	12	slr0605 hypothetical protein		1	12	12	12	45.5	45.5	45.5	36.538	319	17.6735	17.5333	17.4209	17.5426	17.7852	17.6998	17.6941	17.7264	1.13589	0.113983
slr0606	slr0606	10	10	10	slr0606 hypothetical protein		1	10	10	10	35	35	35	34.766	317	18.7255	18.6768	18.5851	18.6625	18.5556	18.5974	18.5347	18.5626	0.9331	0.120904
slr0607	slr0607	2	2	2	slr0607 hypothetical protein		1	2	2	2	15.5	15.5	15.5	14.377	129	15.3164	15.2748	15.0849	15.2254	14.8488	14.8719	14.7835	14.8348	0.762804	0.0211703
slr0608	slr0608	9	9	9	slr0608 histidine biosynthesis bifunctional protein HisIE		1	9	9	9	44.2	44.2	44.2	23.945	215	17.2403	17.1671	17.1958	17.2011	17.2337	17.1451	17.1701	17.183	0.987531	0.622711
slr0609	slr0609	8	8	8	slr0609 hypothetical protein		1	8	8	8	19.8	19.8	19.8	43.263	383	16.4086	16.4339	16.3967	16.4131	16.3595	16.3401	16.3708	16.3568	0.961751	0.0177272
slr0611	slr0611	10	10	10	slr0611 solanesyl diphosphate synthase		1	10	10	10	34.1	34.1	34.1	35.725	323	17.1781	17.169	17.2692	17.2054	17.2311	17.2197	17.1881	17.213	1.00525	0.842507
slr0612	slr0612	2	2	2	slr0612 probable pseudouridine synthase		1	2	2	2	15.2	15.2	15.2	26.177	230	12.4936	12.5275	12.5629	12.528	12.4604	12.5889	12.5329	12.5274	0.999577	0.989355
slr0613	slr0613	4	4	4	slr0613 hypothetical protein		1	4	4	4	27.7	27.7	27.7	18.297	173	14.6615	14.6852	14.8103	14.719	14.7413	14.7496	14.7887	14.7599	1.02873	0.474461
slr0615	slr0615	5	5	5	slr0615 ATP-binding protein of ABC transporter		1	5	5	5	7.6	7.6	7.6	64.292	580	12.8131	12.9486	12.8674	12.8763	12.8479	12.9681	12.9139	12.91	1.02357	0.55745
slr0617	slr0617	4	4	4	slr0617 unknown protein		1	4	4	4	10	10	10	45.788	451	13.6149	13.782	13.7658	13.7209	13.3938	13.7041	13.5807	13.5595	0.894168	0.214321
slr0618	slr0618	1	1	1	slr0618 cobyric acid synthase		1	1	1	1	3	3	3	58.198	527	12.2957	12.3069	12.016	12.2062	12.0833	12.223	11.9776	12.0946	0.92556	0.404544
slr0619	slr0619	8	8	8	slr0619 hypothetical protein		1	8	8	8	23.9	23.9	23.9	38.287	348	15.5346	15.5446	15.5599	15.5463	15.3651	15.4407	15.3712	15.3923	0.898741	0.0171498
slr0623	slr0623	5	5	5	slr0623 thioredoxin		1	5	5	5	58.9	58.9	58.9	11.748	107	19.9851	19.907	19.8894	19.9271	19.8099	19.7925	19.8805	19.8276	0.93333	0.0674108
slr0624	slr0624	6	6	6	slr0624 UDP-N-acetylglucosamine 2-epimerase		1	6	6	6	22.1	22.1	22.1	40.643	371	15.7562	15.6884	15.8342	15.7596	15.733	15.6652	15.7161	15.7048	0.962715	0.329098
slr0625	slr0625	4	4	4	slr0625 hypothetical protein		1	4	4	4	10.1	10.1	10.1	52.715	487	13.9735	14.0367	14.1509	14.0537	14.0878	14.0636	13.9799	14.0438	0.99311	0.88013
slr0626	slr0626	8	8	8	slr0626 probable glycosyltransferase		1	8	8	8	27.4	27.4	27.4	44.369	398	15.9948	16.0369	15.9596	15.9971	15.9369	15.9684	15.9343	15.9465	0.965575	0.137909
slr0628	slr0628	4	4	4	slr0628 30S ribosomal protein S14		1	4	4	4	30	30	30	11.854	100	15.8329	15.8113	15.9704	15.8715	15.8895	15.7109	15.7149	15.7718	0.933177	0.267134
slr0630	slr0630	2	2	2	slr0630 hypothetical protein		1	2	2	2	9.1	9.1	9.1	24.769	219	14.1953	14.2883	14.3229	14.2688	14.2392	14.312	14.6098	14.387	1.08539	0.410477
slr0633	slr0633	6	6	6	slr0633 thiamine biosynthesis protein ThiG		1	6	6	6	11.4	11.4	11.4	70.27	656	16.7638	16.7531	16.8925	16.8031	16.8901	16.8562	16.8856	16.8773	1.05275	0.235963
slr0634	slr0634	6	5	5	slr0634 unknown protein		1	6	5	5	29.2	25.5	25.5	21.728	192	15.4313	15.6371	15.3881	15.4855	15.3766	15.6734	15.5433	15.5311	1.0321	0.712839
slr0635	slr0635	9	9	9	slr0635 hypothetical protein		1	9	9	9	30.4	30.4	30.4	35.538	312	16.8096	16.8019	16.8883	16.8333	16.8976	16.9293	16.8808	16.9026	1.04919	0.112222
slr0637	slr0637	8	8	8	slr0637 hypothetical protein		1	8	8	8	34.9	34.9	34.9	29.017	261	16.2025	16.1294	16.1005	16.1441	16.1161	16.0495	16.0815	16.0824	0.958102	0.173785
slr0638	slr0638	9	9	9	slr0638 glycyl-tRNA synthetase alpha chain		1	9	9	9	32.4	32.4	32.4	34.363	299	16.6998	16.6934	16.7823	16.7252	16.7862	16.7765	16.7438	16.7688	1.03072	0.26529
slr0640	slr0640	4	4	4	slr0640 two-component sensor histidine kinase		1	4	4	4	8.8	8.8	8.8	49.203	441	13.5062	13.4855	13.512	13.5012	13.3247	13.3596	13.4086	13.3643	0.909457	0.0214705
slr0643	slr0643	4	4	4	slr0643 hypothetical protein		1	4	4	4	9.1	9.1	9.1	54.357	493	15.1374	15.204	14.9552	15.0989	15.0942	15.1169	15.1227	15.1113	1.00863	0.883355
slr0644	slr0644	4	4	4	slr0644 nitrogen regulation protein NifR3 homolog		1	4	4	4	12.4	12.4	12.4	39.255	355	14.9839	15.0492	14.9518	14.995	14.7466	14.8817	14.837	14.8217	0.886861	0.0281797
slr0645	slr0645	12	12	12	slr0645 hypothetical protein		1	12	12	12	63.6	63.6	63.6	22.785	206	18.1226	18.0715	18.1012	18.0984	18.2016	18.1343	18.1332	18.1564	1.04097	0.109764
slr0646	slr0646	5	5	5	slr0646 probable D-alanyl-D-alanine carboxypeptidase		1	5	5	5	12.1	12.1	12.1	53.027	486	15.5847	15.5761	15.5271	15.5626	16.1198	16.0571	16.0922	16.0897	1.44099	3.23843e-05
slr0649	slr0649	13	13	13	slr0649 methionyl-tRNA synthetase		1	13	13	13	32.3	32.3	32.3	61.442	532	16.5001	16.4967	16.6241	16.5403	16.5248	16.5309	16.5246	16.5267	0.990636	0.776935
slr0650	slr0650	7	7	7	slr0650 hypothetical protein		1	7	7	7	31.8	31.8	31.8	22.501	201	17.3904	17.3193	17.2961	17.3353	17.3729	17.3108	17.3191	17.3343	0.999307	0.978378
slr0651	slr0651	3	3	3	slr0651 hypothetical protein		1	3	3	3	24.4	24.4	24.4	14.057	127	13.9809	13.9838	14.0888	14.0178	13.9745	14.0532	14.0721	14.0333	1.01077	0.756243
slr0652	slr0652	7	7	7	slr0652 phosphorybosilformimino-5-amino- phosphorybosil-4-imidazolecarboxamideisomerase		1	7	7	7	33.6	33.6	33.6	27.35	256	17.2408	17.1945	17.2683	17.2345	17.0188	17.0838	17.0891	17.0639	0.888453	0.00547752
slr0653	slr0653	17	17	17	slr0653 principal RNA polymerase sigma factor SigA		1	17	17	17	39.8	39.8	39.8	49.935	425	17.708	17.6849	17.7081	17.7003	17.6386	17.6178	17.6095	17.622	0.94714	0.00262778
slr0654	slr0654	2	2	2	slr0654 unknown protein		1	2	2	2	7.1	7.1	7.1	28.428	253	16.7534	16.8127	16.8793	16.8152	16.8094	16.8782	16.8255	16.8377	1.01572	0.626338
slr0655	slr0655	1	1	1	slr0655 hypothetical protein		1	1	1	1	10	10	10	20.793	180	9.63926	9.2546	8.95872	9.28419	9.15373	9.08209	8.96589	9.06724	0.86038	0.386983
slr0656	slr0656	4	4	4	slr0656 hypothetical protein		1	4	4	4	9	9	9	46.699	398	13.9208	13.9707	13.8247	13.9054	14.0075	14.1015	13.981	14.03	1.09019	0.0931404
slr0657	slr0657	17	17	17	slr0657 aspartate kinase		1	17	17	17	38.2	38.2	38.2	63.533	600	16.8202	16.8005	16.7589	16.7932	16.8084	16.7567	16.7958	16.787	0.995687	0.806852
slr0658	slr0658	7	7	7	slr0658 unknown protein		1	7	7	7	21.5	21.5	21.5	37.593	331	15.3881	15.3997	15.4259	15.4046	15.3807	15.3659	15.4005	15.3823	0.984716	0.213518
slr0659	slr0659	14	14	14	slr0659 oligopeptidase A		1	14	14	14	23.6	23.6	23.6	80.296	713	18.4735	18.4667	18.4993	18.4798	18.5888	18.5622	18.6603	18.6038	1.08968	0.0402104
slr0661	slr0661	8	8	8	slr0661 pyrroline-5-carboxylate reductase		1	8	8	8	34.1	34.1	34.1	27.883	267	17.299	17.3424	17.4523	17.3646	17.447	17.4628	17.5314	17.4804	1.08361	0.109471
slr0662	slr0662	20	20	19	slr0662 arginine decarboxylase		1	20	20	19	24	24	22.9	78.238	695	18.0461	18.0053	18.0854	18.0456	17.9082	17.9417	17.8837	17.9112	0.911035	0.0115297
slr0664	slr0664	3	3	3	slr0664 hypothetical protein		1	3	3	3	25.8	25.8	25.8	13.679	120	13.5349	13.483	13.2601	13.426	13.4911	13.5612	13.582	13.5448	1.0858	0.292388
slr0665	slr0665	37	37	37	slr0665 aconitate hydratase		1	37	37	37	48.6	48.6	48.6	93.551	868	19.4579	19.4496	19.4451	19.4509	19.3859	19.3769	19.3876	19.3834	0.954342	0.000189458
slr0666	slr0666	6	6	6	slr0666 unknown protein		1	6	6	6	22.2	22.2	22.2	32.245	275	15.4666	15.4641	15.5306	15.4871	15.0522	15.0151	15.0253	15.0308	0.728869	0.000354285
slr0667	slr0667	1	1	1	slr0667 unknown protein		1	1	1	1	6.4	6.4	6.4	20.509	173	12.9807	12.9895	13.0621	13.0107	13.0715	13.0672	12.9301	13.0229	1.00849	0.832663
slr0670	slr0670	9	9	9	slr0670 hypothetical protein		1	9	9	9	46	46	46	32.676	291	16.7644	16.7668	16.7972	16.7762	16.7944	16.7905	16.7911	16.792	1.01105	0.270903
slr0676	slr0676	5	5	5	slr0676 adenylylsulfate kinase		1	5	5	5	40.7	40.7	40.7	19.674	177	16.934	17.012	16.8524	16.9328	16.7027	16.8233	16.7717	16.7659	0.890767	0.0486216
slr0677	slr0677	5	5	5	slr0677 biopolymer transport ExbB like protein		1	5	5	5	22	22	22	25.074	227	15.7912	15.9252	15.8253	15.8472	15.7454	15.8803	15.8864	15.8374	0.993193	0.87985
slr0678	slr0678	3	3	3	slr0678 biopolymer transport ExbD like protein		1	3	3	3	13	13	13	28.439	269	14.721	14.794	14.8703	14.7951	14.8702	14.8453	14.918	14.8779	1.05903	0.186272
slr0679	slr0679	3	3	3	slr0679 sun protein		1	3	3	3	7.8	7.8	7.8	49.729	446	13.607	13.7203	13.7389	13.6887	13.971	13.9201	13.8711	13.9207	1.17448	0.0129074
slr0681	slr0681	4	4	4	slr0681 probable sodium/calcium exchanger protein		1	4	4	4	7.6	7.6	7.6	38.986	368	15.3301	15.3728	15.347	15.35	15.6108	15.5821	15.489	15.5606	1.15718	0.020336
slr0682	slr0682	8	8	8	slr0682 histidinol dehydrogenase		1	8	8	8	24.4	24.4	24.4	45.137	409	16.2137	16.149	16.1864	16.183	16.2372	16.1257	16.1675	16.1768	0.995695	0.878216
slr0686	slr0686	2	2	2	slr0686 hypothetical protein		1	2	2	2	20.2	20.2	20.2	13.373	119	11.5202	11.4875	11.4261	11.4779	11.457	11.517	11.4754	11.4831	1.00363	0.88237
slr0687	slr0687	2	2	2	slr0687 probable two-component response regulator		1	2	2	2	3.3	3.3	3.3	54.709	481	13.1176	13.2696	13.0084	13.1319	13.0788	12.9816	12.9388	12.9997	0.912489	0.220541
slr0688	slr0688	7	7	7	slr0688 hypothetical protein		1	7	7	7	18.4	18.4	18.4	37.956	343	16.2868	16.3245	16.3279	16.3131	16.2001	16.1125	16.1882	16.167	0.903682	0.0189158
slr0689	slr0689	11	11	11	slr0689 hypothetical protein		1	11	11	11	32.9	32.9	32.9	42.546	398	16.3198	16.3508	16.3011	16.3239	16.2907	16.369	16.3052	16.3216	0.998429	0.940278
slr0692	slr0692	18	18	18	slr0692 hypothetical protein YCF45		1	18	18	18	36.5	36.5	36.5	65.942	589	17.4087	17.4978	17.3112	17.4059	17.2771	17.4412	17.4007	17.373	0.977442	0.675959
slr0695	slr0695	9	9	9	slr0695 hypothetical protein		1	9	9	9	57.2	57.2	57.2	19.049	173	16.8507	16.9297	16.9033	16.8946	16.8857	16.9431	17.0262	16.9516	1.04036	0.30653
slr0697	slr0697	13	13	13	slr0697 5-oxoprolinase homolog		1	13	13	13	13.4	13.4	13.4	136.05	1252	16.5305	16.5514	16.52	16.534	16.5345	16.5398	16.5752	16.5498	1.01104	0.376686
slr0698	slr0698	3	3	3	slr0698 hypothetical protein		1	3	3	3	15.6	15.6	15.6	18.016	154	16.396	16.3516	16.1386	16.2954	16.417	16.3654	16.3546	16.379	1.05966	0.40421
slr0699	slr0699	4	4	4	slr0699 unknown protein		1	4	4	4	23.6	23.6	23.6	16.261	140	13.8218	13.8674	14.0182	13.9025	13.8947	13.8722	13.8442	13.8703	0.97798	0.646553
slr0707	slr0707	22	22	22	slr0707 DNA polymerase I		1	22	22	22	23.5	23.5	23.5	110.29	986	17.6407	17.7088	17.5716	17.6404	17.5181	17.6198	17.5623	17.5668	0.950256	0.215908
slr0708	slr0708	9	9	9	slr0708 periplasmic protein, function unknown		1	9	9	9	38.1	38.1	38.1	44.68	402	15.5902	15.5641	15.5191	15.5578	15.4933	15.5392	15.5065	15.513	0.969407	0.156755
slr0709	slr0709	2	2	2	slr0709 hypothetical protein		1	2	2	2	23.8	23.8	23.8	13.834	130	15.0474	15.0827	15.0423	15.0575	15.0344	14.9591	14.9245	14.9726	0.942902	0.106153
slr0710	slr0710	7	7	7	slr0710 glutamate dehydrogenase (NADP+)		1	7	7	7	19.9	19.9	19.9	47.312	428	17.0429	17.0349	16.9066	16.9948	16.9772	16.9349	16.9141	16.942	0.964076	0.359407
slr0711	slr0711	2	2	2	slr0711 hypothetical protein		1	2	2	2	17.5	17.5	17.5	15.94	137	14.8961	14.9416	14.9792	14.939	14.8969	14.9439	14.9587	14.9332	0.995975	0.858079
slr0713	slr0713	3	3	3	slr0713 tRNA-guanine transglycosylase		1	3	3	3	11.5	11.5	11.5	41.498	374	15.125	15.1354	15.1469	15.1358	15.0849	15.1202	15.1247	15.1099	0.982225	0.165086
slr0719	slr0719	6	6	6	slr0719 unknown protein		1	6	6	6	24.7	24.7	24.7	42.301	388	16.3601	16.3558	16.4212	16.379	16.2205	16.2509	16.3055	16.259	0.920157	0.0222104
slr0721	slr0721	8	8	8	slr0721 malic enzyme		1	8	8	8	21.6	21.6	21.6	48.699	463	16.9968	16.9751	17.0292	17.0004	17.0626	16.9559	16.9749	16.9978	0.998231	0.948715
slr0722	slr0722	3	3	3	slr0722 hypothetical protein		1	3	3	3	16.7	16.7	16.7	25.992	240	10.8671	11.1771	10.7603	10.9349	10.6073	10.5867	10.4617	10.5519	0.766865	0.078216
slr0723	slr0723	7	7	7	slr0723 hypothetical protein		1	7	7	7	21.5	21.5	21.5	41.429	363	16.1007	16.0698	16.1754	16.1153	16.1444	16.0681	16.1564	16.123	1.00534	0.863202
slr0724	slr0724	2	2	2	slr0724 HtaR suppressor protein homolog		1	2	2	2	24.5	24.5	24.5	12.245	110	8.67731	8.56469	8.80076	8.68092	8.16574	8.98768	8.76407	8.63916	0.971474	0.883025
slr0727	slr0727	8	8	8	slr0727 unknown protein		1	8	8	8	25.3	25.3	25.3	39.2	324	15.9291	15.8677	15.8682	15.8883	16.1751	16.0632	16.0482	16.0955	1.15443	0.0195768
slr0728	slr0728	2	2	2	slr0728 hypothetical protein		1	2	2	2	4.7	4.7	4.7	39.788	358	14.1538	14.1701	14.1922	14.172	14.2536	14.3708	14.3163	14.3136	1.10308	0.0417347
slr0729	slr0729	6	6	6	slr0729 hypothetical protein		1	6	6	6	57.4	57.4	57.4	10.946	101	17.8802	17.8736	17.825	17.8596	18.0533	17.9956	18.0326	18.0272	1.12317	0.00231504
slr0730	slr0730	2	2	2	slr0730 hypothetical protein		1	2	2	2	16.7	16.7	16.7	15.153	132	15.3808	15.5225	15.6122	15.5052	15.6234	15.7903	15.7786	15.7307	1.16925	0.061921
slr0731	slr0731	11	11	11	slr0731 hypothetical protein		1	11	11	11	24.1	24.1	24.1	44.716	402	17.3258	17.2771	17.2728	17.2919	17.187	17.2044	17.2052	17.1989	0.937548	0.0221417
slr0734	slr0734	4	4	4	slr0734 hypothetical protein		1	4	4	4	11.8	11.8	11.8	41.08	372	14.726	14.6828	14.7407	14.7165	14.8523	14.8408	14.8557	14.8496	1.09665	0.0123985
slr0737	slr0737	11	11	11	slr0737 photosystem I subunit II		1	11	11	11	57.4	57.4	57.4	15.644	141	20.1229	20.1729	20.1855	20.1604	20.2874	20.2824	19.9442	20.1713	1.00757	0.932946
slr0738	slr0738	18	18	18	slr0738 anthranilate synthetase alpha-subunit		1	18	18	18	38.4	38.4	38.4	57.146	508	17.8123	17.8094	17.8682	17.83	17.7906	17.7917	17.7531	17.7785	0.964925	0.0985899
slr0739	slr0739	7	7	7	slr0739 geranylgeranyl pyrophosphate synthase		1	7	7	7	26.2	26.2	26.2	32.373	302	16.4516	16.4518	16.7018	16.535	16.4649	16.4907	16.5097	16.4884	0.968216	0.633978
slr0740	slr0740	5	5	5	slr0740 hypothetical protein		1	5	5	5	38.9	38.9	38.9	14.495	131	15.9286	15.8909	15.9004	15.9066	15.6744	15.7125	15.6771	15.688	0.859387	0.000204358
slr0741	slr0741	7	7	7	slr0741 transcriptional regulator		1	7	7	7	31.2	31.2	31.2	25.767	224	15.0724	15.1705	15.105	15.1159	15.0518	15.1829	15.186	15.1402	1.01697	0.673373
slr0742	slr0742	2	2	2	slr0742 hypothetical protein		1	2	2	2	14.8	14.8	14.8	19.493	176	12.0239	12.1285	11.8788	12.0104	12.3201	12.2191	12.0976	12.2123	1.15021	0.106384
slr0743	slr0743	18	18	18	slr0743 similar to N utilization substance protein		1	18	18	18	41.7	41.7	41.7	51.33	458	17.2755	17.2498	17.2281	17.2511	17.2693	17.2092	17.233	17.2372	0.990383	0.566145
slr0744	slr0744	44	44	44	slr0744 translation initiation factor IF-2		1	44	44	44	46.1	46.1	46.1	108.12	1001	19.3105	19.3477	19.3812	19.3465	19.5417	19.5571	19.5502	19.5497	1.15125	0.00767425
slr0746	slr0746	5	5	5	slr0746 glucosylglycerolphosphate phosphatase		1	5	5	5	18	18	18	46.542	422	14.8395	14.6617	14.7702	14.7571	14.692	14.5497	14.5891	14.6103	0.903209	0.0957968
slr0747	slr0747	4	4	4	slr0747 glucosylglycerol transport system ATP-binding protein		1	4	4	4	9.9	9.9	9.9	40.755	363	15.212	15.2172	15.2652	15.2315	15.2936	15.2538	15.271	15.2728	1.02907	0.12278
slr0748	slr0748	3	3	3	slr0748 hypothetical protein		1	3	3	3	13	13	13	26.527	230	14.8765	14.8548	14.9849	14.9054	14.7984	14.8507	14.7701	14.8064	0.933679	0.11742
slr0749	slr0749	4	4	4	slr0749 light-independent protochlorophyllide reductase iron protein subunit ChlL		1	4	4	4	21.2	21.2	21.2	34.044	311	13.933	13.8322	13.7523	13.8392	13.9833	13.891	13.9474	13.9405	1.07279	0.183376
slr0750	slr0750	8	8	8	slr0750 light-independent protochlorophyllide reductase subunit ChlN		1	8	8	8	23	23	23	52.474	469	16.496	16.5914	16.5999	16.5624	16.6246	16.6492	16.6438	16.6392	1.05467	0.141597
slr0752	slr0752	13	13	13	slr0752 enolase		1	13	13	13	50	50	50	46.528	432	18.012	18.0566	17.942	18.0035	18.0526	18.0235	17.915	17.997	0.995522	0.909841
slr0753	slr0753	2	2	2	slr0753 probable transport protein		1	2	2	2	5.6	5.6	5.6	48.003	449	14.1969	14.0737	14.3484	14.2063	13.5057	13.5094	13.5648	13.5266	0.624296	0.0101118
slr0755	slr0755	3	3	3	slr0755 hypothetical protein		1	3	3	3	18.4	18.4	18.4	21.543	185	13.523	13.4137	13.1944	13.377	13.2566	13.3059	13.1268	13.2298	0.902965	0.271236
slr0756	slr0756	3	3	3	slr0756 circadian clock protein KaiA homolog		1	3	3	3	9.4	9.4	9.4	34.893	299	14.6784	14.5557	14.7865	14.6735	14.5996	14.6626	14.6166	14.6263	0.96776	0.556877
slr0757	slr0757	5	5	5	slr0757 circadian clock protein KaiB homolog		1	5	5	5	41.9	41.9	41.9	11.935	105	16.0666	15.9351	16.396	16.1326	16.065	16.0055	16.1189	16.0631	0.952992	0.666444
slr0758	slr0758	16	16	16	slr0758 circadian clock protein KaiC homolog		1	16	16	16	33.5	33.5	33.5	58.294	519	18.0295	18.0547	18.0412	18.0418	18.0385	18.0293	18.0141	18.0273	0.989982	0.226607
slr0765	slr0765	9	9	9	slr0765 hypothetical protein		1	9	9	9	15.9	15.9	15.9	68.874	617	15.5193	15.5507	15.5484	15.5394	15.7438	15.7179	15.7468	15.7362	1.14608	0.000142282
slr0769	slr0769	2	2	2	slr0769 hypothetical protein		1	2	2	2	10.3	10.3	10.3	21.913	204	14.3485	14.3347	14.2086	14.2973	14.3284	14.3772	14.3458	14.3505	1.03757	0.35552
slr0770	slr0770	2	2	2	slr0770 hypothetical protein		1	2	2	2	26.4	26.4	26.4	12.017	106	12.7681	12.716	12.5968	12.6936	13.018	12.9045	13.1049	13.0092	1.24449	0.0154643
slr0771	slr0771	1	1	1	slr0771 hypothetical protein		1	1	1	1	9.9	9.9	9.9	12.552	111	11.1134	11.0046	10.8741	10.9974	10.6904	10.8506	10.9197	10.8202	0.88444	0.141643
slr0772	slr0772	14	14	14	slr0772 light-independent protochlorophyllide reductase subunit ChlB		1	14	14	14	34.1	34.1	34.1	56.951	508	16.8645	16.9136	16.7864	16.8548	16.8937	16.9457	16.9518	16.9304	1.05375	0.167331
slr0773	slr0773	2	2	2	slr0773 hypothetical protein		1	2	2	2	12.8	12.8	12.8	24.118	226	13.0547	13.1145	13.1778	13.1157	13.3667	13.314	13.3634	13.348	1.17476	0.0109767
slr0774	slr0774	12	12	12	slr0774 protein-export membrane protein SecD		1	12	12	12	38.1	38.1	38.1	48.177	452	17.8578	17.8814	17.8144	17.8512	17.9426	17.9475	17.9476	17.9459	1.06787	0.039461
slr0775	slr0775	4	4	4	slr0775 protein-export membrane protein SecF		1	4	4	4	17.1	17.1	17.1	34.667	315	16.5943	16.6081	16.4471	16.5498	16.5203	16.6775	16.617	16.6049	1.03892	0.469409
slr0776	slr0776	13	13	13	slr0776 UDP-3-o-[3-hydroxymyristoyl] glucosamine n-acyltransferase		1	13	13	13	49.4	49.4	49.4	36.193	344	17.677	17.6651	17.6544	17.6655	17.7309	17.7013	17.7384	17.7235	1.04103	0.0184996
slr0780	slr0780	4	4	4	slr0780 hypothetical protein		1	4	4	4	21.7	21.7	21.7	19.173	161	13.6325	13.6324	13.5844	13.6164	13.6421	13.4751	13.396	13.5044	0.925285	0.259713
slr0782	slr0782	16	16	16	slr0782 putative flavin-containing monoamine oxidase		1	16	16	16	40.8	40.8	40.8	51.404	471	17.4289	17.3809	17.4098	17.4065	17.3649	17.3393	17.2924	17.3322	0.9498	0.0514847
slr0783	slr0783	7	7	7	slr0783 triosephosphate isomerase		1	7	7	7	38.4	38.4	38.4	26.158	242	17.4321	17.3932	17.4748	17.4334	17.2217	17.3404	17.277	17.2797	0.89895	0.0258868
slr0784	slr0784	2	2	2	slr0784 hypothetical protein		1	2	2	2	5.3	5.3	5.3	37.941	340	13.5853	13.6868	13.6689	13.647	13.6937	13.6513	13.6012	13.6487	1.00121	0.968176
slr0787	slr0787	3	3	3	slr0787 hypothetical protein		1	3	3	3	9.4	9.4	9.4	38.532	339	13.9036	13.9711	14.4129	14.0959	14.0684	14.009	13.8602	13.9792	0.922316	0.551734
slr0793	slr0793	4	4	4	slr0793 cation efflux system protein involved in nickel and cobalt tolerance		1	4	4	4	21.9	21.9	21.9	22.047	215	12.097	12.4968	12.4861	12.36	13.5466	13.4849	13.5263	13.5193	2.23347	0.0114542
slr0797	slr0797	1	1	1	slr0797 cobalt-transporting P-type ATPase (cobalt efflux pump) involved in cobalt tolerance		1	1	1	1	1.1	1.1	1.1	68.716	642	13.0536	12.9557	12.9015	12.9703	13.2619	13.1128	13.0913	13.1553	1.13686	0.058685
slr0798	slr0798	10	10	10	slr0798 zinc-transporting P-type ATPase (zinc efflux pump) involved in zinc tolerance		1	10	10	10	16.2	16.2	16.2	76.883	721	17.073	17.0714	17.0599	17.0681	16.4671	16.4701	16.3607	16.4326	0.643713	0.00287913
slr0806	slr0806	9	9	9	slr0806 hypothetical protein		1	9	9	9	19.6	19.6	19.6	47.989	439	17.0854	17.0718	17.1151	17.0908	17.141	17.106	17.154	17.1337	1.0302	0.0900151
slr0807	slr0807	2	2	2	slr0807 probable o-sialoglycoprotein endopeptidase		1	2	2	2	10.1	10.1	10.1	37.099	348	13.4269	13.4742	13.4499	13.4503	13.2707	13.3654	13.0776	13.2379	0.863061	0.125422
slr0808	slr0808	5	5	5	slr0808 16S rRNA processing protein RimM homolog		1	5	5	5	25.9	25.9	25.9	20.715	185	15.0133	14.9873	14.9907	14.9971	14.9395	14.9328	14.9053	14.9259	0.951829	0.00678782
slr0809	slr0809	12	12	12	slr0809 dTDP-glucose 4,6-dehydratase		1	12	12	12	38.4	38.4	38.4	36.942	328	17.8897	17.8576	17.8544	17.8672	17.7941	17.8203	17.7838	17.7994	0.954063	0.0123422
slr0813	slr0813	2	2	2	slr0813 hypothetical protein		1	2	2	2	7.5	7.5	7.5	43.586	389	13.0663	13.0603	13.1168	13.0811	13.0839	13.1505	13.0605	13.0983	1.01199	0.627112
slr0815	slr0815	4	4	4	slr0815 hypothetical protein		1	4	4	4	29.8	29.8	29.8	13.766	121	15.022	14.8605	15.0527	14.9784	15.1457	15.0265	15.0265	15.0662	1.06275	0.296648
slr0816	slr0816	6	6	6	slr0816 hypothetical protein		1	6	6	6	41.3	41.3	41.3	18.919	167	15.4752	15.6838	15.4365	15.5318	15.3745	15.6875	15.6229	15.5617	1.02089	0.820072
slr0818	slr0818	8	8	8	slr0818 hypothetical protein		1	8	8	8	20.6	20.6	20.6	50.417	451	16.3335	16.3102	16.2891	16.3109	16.2798	16.2867	16.2952	16.2872	0.983685	0.197703
slr0821	slr0821	2	2	2	slr0821 hypothetical protein		1	2	2	2	23.1	23.1	23.1	9.7249	91	16.477	16.4623	16.4243	16.4545	16.4334	16.4648	16.4179	16.4387	0.989094	0.491631
slr0822	slr0822	6	5	5	slr0822 cation-transporting P-type ATPase PacL		1	6	5	5	6.2	5.4	5.4	103.65	953	15.5467	15.5587	15.8351	15.6468	15.6286	15.6782	15.6896	15.6655	1.01302	0.862673
slr0823	slr0823	6	6	6	slr0823 photosystem I assembly related protein		1	6	6	6	38.7	38.7	38.7	19.878	173	16.8061	16.7507	16.8807	16.8125	16.7948	16.8289	16.7708	16.7982	0.99013	0.753284
slr0825	slr0825	13	13	13	slr0825 probable peptidase		1	13	13	13	24.6	24.6	24.6	70.175	637	17.3357	17.367	17.3553	17.3526	17.3538	17.3045	17.2982	17.3188	0.976839	0.18617
slr0829	slr0829	14	14	14	slr0829 unknown protein		1	14	14	14	18.2	18.2	18.2	94.106	829	16.4729	16.5379	16.5663	16.5257	16.6531	16.6386	16.7107	16.6675	1.10327	0.0175979
slr0833	slr0833	7	7	7	slr0833 replicative DNA helicase [Contains: Ssp dnaB intein]		1	7	7	7	9.1	9.1	9.1	97.812	872	15.5597	15.6234	15.8497	15.6776	15.5292	15.6501	15.709	15.6294	0.967168	0.668475
slr0835	slr0835	9	9	9	slr0835 MoxR protein homolog		1	9	9	9	36.6	36.6	36.6	33.452	303	16.1263	16.1442	16.2004	16.157	16.305	16.3129	16.3013	16.3064	1.10913	0.0196732
slr0836	slr0836	7	7	7	slr0836 dTDP-glucose 4,6-dehydratase		1	7	7	7	21.9	21.9	21.9	38.487	342	17.0322	16.9665	17.0913	17.03	17.0768	17.0218	16.9903	17.0297	0.999764	0.994231
slr0838	slr0838	6	6	6	slr0838 phosphoribosyl formylglycinamidine cyclo-ligase		1	6	6	6	24	24	24	36.164	341	15.6671	15.6987	15.8491	15.7383	15.7816	15.6895	15.7728	15.748	1.00669	0.888822
slr0839	slr0839	6	6	6	slr0839 ferrochelatase		1	6	6	6	21.4	21.4	21.4	43.924	387	17.2684	17.2034	17.4316	17.3011	17.2415	17.194	17.3008	17.2454	0.962112	0.512818
slr0841	slr0841	9	9	9	slr0841 periplasmic protein, function unknown		1	9	9	9	42.6	42.6	42.6	31.566	291	16.6221	16.6315	16.6579	16.6372	16.5851	16.6055	16.5913	16.594	0.9705	0.0361731
slr0842	slr0842	9	9	9	slr0842 hypothetical protein		1	9	9	9	23.8	23.8	23.8	45.468	404	16.5013	16.4901	16.5538	16.5151	16.5089	16.488	16.5148	16.5039	0.992294	0.640193
slr0844	slr0844	3	3	3	slr0844 NADH dehydrogenase subunit 5		1	3	3	3	3.7	3.7	3.7	74.399	681	16.503	16.3673	16.8243	16.5649	16.6257	16.5748	16.6382	16.6129	1.03385	0.758073
slr0845	slr0845	2	2	2	slr0845 hypothetical protein		1	2	2	2	10.5	10.5	10.5	21.833	190	13.6888	13.746	13.7179	13.7176	13.8129	13.8153	13.9018	13.8433	1.09109	0.0304898
slr0847	slr0847	2	2	2	slr0847 phosphopantetheine adenylyltransferase		1	2	2	2	11.9	11.9	11.9	17.593	159	15.4141	15.4452	15.5589	15.4727	15.3183	15.4115	15.3357	15.3552	0.921733	0.099587
slr0848	slr0848	16	16	16	slr0848 hypothetical protein		1	16	16	16	62.5	62.5	62.5	31.79	277	17.4066	17.4732	17.5215	17.4671	17.4885	17.5194	17.576	17.5279	1.04308	0.225697
slr0851	slr0851	1	1	1	slr0851 type 2 NADH dehydrogenase		1	1	1	1	2.5	2.5	2.5	49.133	445	15.6448	15.7123	16.35	15.9024	15.9728	16.0171	16.1238	16.0379	1.09848	0.610234
slr0852	slr0852	2	2	2	slr0852 hypothetical protein		1	2	2	2	28.9	28.9	28.9	16.445	142	13.7657	13.7352	13.6006	13.7005	13.6762	13.7971	13.6977	13.7237	1.01621	0.732588
slr0854	slr0854	11	11	11	slr0854 DNA photolyase		1	11	11	11	24.8	24.8	24.8	56.025	488	16.8931	16.8531	16.937	16.8944	16.9907	16.9759	16.9433	16.97	1.05376	0.0686758
slr0861	slr0861	12	12	12	slr0861 glycinamide ribonucleotide transformylase		1	12	12	12	37.6	37.6	37.6	42.424	391	17.4648	17.5025	17.4113	17.4595	17.4396	17.4628	17.4092	17.4372	0.984652	0.516095
slr0862	slr0862	8	8	8	slr0862 probable sugar kinase		1	8	8	8	22.7	22.7	22.7	36.363	326	15.8962	15.9803	15.8876	15.9213	15.943	16.0123	16.012	15.9891	1.04811	0.14907
slr0863	slr0863	12	12	12	slr0863 hypothetical protein		1	12	12	12	33	33	33	50.369	463	17.3154	17.3536	17.2291	17.2994	17.0223	17.0835	17.0697	17.0585	0.846256	0.0104512
slr0864	slr0864	11	11	11	slr0864 ATP-binding protein of ABC transporter		1	11	11	11	22.8	22.8	22.8	65.027	574	15.7933	15.8851	15.8028	15.827	15.6529	15.7284	15.7153	15.6989	0.914992	0.0284188
slr0865	slr0865	4	4	4	slr0865 hypothetical protein		1	4	4	4	11.9	11.9	11.9	37.963	337	14.7142	14.6878	14.7752	14.7257	14.6403	14.6445	14.7126	14.6658	0.95929	0.161764
slr0867	slr0867	2	2	2	slr0867 unknown protein		1	2	2	2	16.3	16.3	16.3	15.036	135	13.802	14.0036	13.4003	13.7353	13.5845	13.7965	13.6651	13.682	0.96376	0.798719
slr0869	slr0869	38	38	38	slr0869 hypothetical protein		1	38	38	38	53.3	53.3	53.3	92.531	812	18.9393	18.9273	18.8891	18.9186	19.2604	19.2206	19.1906	19.2239	1.23568	0.000413031
slr0870	slr0870	4	4	4	slr0870 hypothetical protein		1	4	4	4	35.8	35.8	35.8	13.761	120	15.6511	15.6272	15.7765	15.6849	15.7412	15.6837	15.7389	15.7213	1.0255	0.52617
slr0872	slr0872	11	11	11	slr0872 hypothetical protein		1	11	11	11	28.2	28.2	28.2	41.515	372	16.8641	16.8234	16.9181	16.8685	16.7179	16.7045	16.707	16.7098	0.895817	0.0264069
slr0875	slr0875	2	2	2	slr0875 large-conductance mechanosensitive channel		1	2	2	2	28.3	28.3	28.3	15.805	145	15.9386	15.9611	15.8623	15.9207	15.7691	15.9888	15.8382	15.8654	0.962401	0.498675
slr0876	slr0876	19	19	19	slr0876 hypothetical protein		1	19	19	19	56.7	56.7	56.7	45.252	409	17.847	17.8811	17.8842	17.8708	17.9204	17.929	17.9647	17.938	1.04774	0.0209248
slr0877	slr0877	14	14	14	slr0877 glutamyl-tRNA(Gln) amidotransferase subunit A		1	14	14	14	46.4	46.4	46.4	51.47	483	17.8362	17.8012	17.8558	17.8311	17.8718	17.8518	17.8473	17.857	1.01809	0.24365
slr0878	slr0878	3	3	3	slr0878 hypothetical protein		1	3	3	3	14.7	14.7	14.7	25.987	245	14.6759	14.6758	14.7736	14.7085	14.7925	14.6784	14.7442	14.7383	1.02092	0.554903
slr0879	slr0879	5	5	5	slr0879 glycine decarboxylase complex H-protein		1	5	5	5	58.3	58.3	58.3	14.58	132	16.1868	16.186	16.1348	16.1692	16.2628	16.2044	16.2139	16.227	1.04092	0.0813903
slr0880	slr0880	6	6	6	slr0880 similar to fibronectin binding protein		1	6	6	6	12.2	12.2	12.2	67.417	590	15.4675	15.4315	15.4798	15.4596	15.4504	15.3769	15.4013	15.4095	0.965889	0.136777
slr0881	slr0881	2	2	2	slr0881 unknown protein		1	2	2	2	16.5	16.5	16.5	12.174	103	13.711	13.6109	13.6371	13.653	13.6279	13.5254	13.4923	13.5485	0.930134	0.114223
slr0882	slr0882	10	10	10	slr0882 hypothetical protein YCF84		1	10	10	10	25.6	25.6	25.6	44.441	394	16.4627	16.4308	16.4096	16.4344	16.3781	16.3727	16.3347	16.3618	0.950955	0.0250206
slr0883	slr0883	2	2	2	slr0883 hypothetical protein		1	2	2	2	3.7	3.7	3.7	53.11	481	14.8579	14.7946	14.8927	14.8484	15.0426	15.0185	15.0428	15.0346	1.13779	0.0170793
slr0884	slr0884	9	9	9	slr0884 glyceraldehyde 3-phosphate dehydrogenase 1 (NAD+)		1	9	9	9	34.7	34.7	34.7	37.919	354	16.6713	16.666	16.7679	16.7017	16.6053	16.6222	16.6927	16.6401	0.958183	0.224318
slr0885	slr0885	2	2	2	slr0885 hypothetical protein		1	2	2	2	9.9	9.9	9.9	21.836	191	15.4713	15.4484	15.4225	15.4474	15.383	15.3863	15.3518	15.3737	0.950205	0.0164275
slr0886	slr0886	2	2	2	slr0886 3-oxoacyl-[acyl-carrier protein] reductase		1	2	2	2	9.7	9.7	9.7	25.723	247	15.3947	15.4016	15.4251	15.4071	15.2339	15.2009	15.1788	15.2046	0.869006	0.00122535
slr0889	slr0889	3	3	3	slr0889 hypothetical protein		1	3	3	3	8.6	8.6	8.6	45.957	408	14.7533	14.7341	14.8442	14.7772	14.8031	14.7888	14.8718	14.8212	1.03099	0.36331
slr0891	slr0891	12	12	12	slr0891 N-acetylmuramoyl-L-alanine amidase		1	12	12	12	25	25	25	64.376	591	17.5507	17.567	17.393	17.5036	17.7694	17.7364	17.6698	17.7252	1.16603	0.0378731
slr0897	slr0897	5	5	5	slr0897 probable endoglucanase		1	5	5	5	4.4	4.4	4.4	112.13	1070	13.3462	13.5931	13.2847	13.408	13.6023	13.7318	13.652	13.662	1.19252	0.0995535
slr0898	slr0898	29	29	29	slr0898 ferredoxin--nitrite reductase		1	29	29	29	59.6	59.6	59.6	55.926	502	19.9241	19.9062	19.9057	19.912	19.8429	19.8518	19.8353	19.8434	0.953536	0.00112069
slr0899	slr0899	6	6	6	slr0899 cyanate lyase		1	6	6	6	54.4	54.4	54.4	16.532	149	16.5377	16.6045	16.4831	16.5418	16.6341	16.6457	16.6419	16.6406	1.07089	0.105152
slr0900	slr0900	10	10	10	slr0900 molybdopterin biosynthesis MoeA protein		1	10	10	10	26.9	26.9	26.9	43.393	390	17.0851	17.0756	17.0789	17.0798	17.0503	16.9474	16.9587	16.9855	0.936667	0.100341
slr0902	slr0902	5	5	5	slr0902 molybdenum cofactor biosynthesis protein C, fused to molybdopterin-guanine dinucleotide biosynthesis protein MobA		1	5	5	5	16.7	16.7	16.7	38.379	347	14.8644	14.8822	14.9173	14.8879	14.8565	14.8962	14.8507	14.8678	0.986145	0.394661
slr0903	slr0903	1	1	1	slr0903 molybdopterin (MPT) converting factor, subunit 2		1	1	1	1	6.2	6.2	6.2	16.461	145	10.9224	10.7792	10.6854	10.7957	10.6197	10.6757	10.4805	10.592	0.868331	0.0885418
slr0904	slr0904	10	10	10	slr0904 competence protein ComM homolog		1	10	10	10	23	23	23	55.133	509	16.7328	16.7192	16.8327	16.7616	16.7361	16.7644	16.8591	16.7865	1.01744	0.654147
slr0906	slr0906	14	14	14	slr0906 photosystem II core light harvesting protein		1	14	14	14	36.7	36.7	36.7	55.902	507	19.5166	19.572	19.5275	19.5387	19.4971	19.5525	19.5434	19.531	0.994677	0.765409
slr0907	slr0907	22	22	22	slr0907 unknown protein		1	22	22	22	25.6	25.6	25.6	115.38	1014	18.1663	18.071	17.8569	18.0314	18.0699	18.0374	17.9916	18.033	1.00109	0.988085
slr0909	slr0909	10	10	10	slr0909 unknown protein		1	10	10	10	25.3	25.3	25.3	52.495	450	17.1394	17.151	17.2457	17.1787	17.1825	17.1934	17.1375	17.1712	0.994808	0.855226
slr0912	slr0912	7	7	7	slr0912 unknown protein		1	7	7	7	31.8	31.8	31.8	29.351	258	15.6284	15.693	15.6538	15.6584	15.5865	15.572	15.5915	15.5833	0.949282	0.0468502
slr0913	slr0913	4	4	4	slr0913 unknown protein		1	4	4	4	8.3	8.3	8.3	61.837	539	14.8117	14.8194	15.0909	14.9073	14.9224	14.8803	14.7975	14.8668	0.97227	0.712708
slr0914	slr0914	4	4	4	slr0914 unknown protein		1	4	4	4	6.9	6.9	6.9	69.458	598	14.3393	14.4011	14.5838	14.4414	14.3594	14.4017	14.432	14.3977	0.970154	0.617435
slr0915	slr0915	4	4	4	slr0915 putative endonuclease [encoded in trnfM-intron: 2791054 - 2791708]		1	4	4	4	24	24	24	17.305	150	16.2568	16.2747	16.1865	16.2393	16.1565	16.1696	16.1094	16.1452	0.936825	0.0518157
slr0917	slr0917	4	4	4	slr0917 7-keto-8-aminopelargonic acid synthetase		1	4	4	4	11.9	11.9	11.9	47.748	437	15.3273	15.2676	15.4729	15.3559	15.4237	15.2443	15.383	15.3503	0.996097	0.948275
slr0918	slr0918	4	4	4	slr0918 methionine aminopeptidase		1	4	4	4	19.8	19.8	19.8	27.235	253	15.8673	15.9206	15.9725	15.9201	16.0038	16.0467	16.0476	16.0327	1.08112	0.0474835
slr0922	slr0922	5	5	5	slr0922 peptidyl-tRNA hydrolase		1	5	5	5	26.8	26.8	26.8	21.524	194	15.2401	15.2457	15.1303	15.2054	15.1743	15.1907	15.1907	15.1853	0.98617	0.647787
slr0923	slr0923	6	6	6	slr0923 hypothetical protein YCF65		1	6	6	6	53.6	53.6	53.6	12.638	112	17.6312	17.5906	17.6269	17.6162	17.6641	17.6225	17.631	17.6392	1.01606	0.272468
slr0924	slr0924	4	4	4	slr0924 periplasmic protein, function unknown		1	4	4	4	24.8	24.8	24.8	26.113	242	15.485	15.477	15.4162	15.4594	15.3413	15.3241	15.2861	15.3172	0.906103	0.00778182
slr0925	slr0925	8	8	8	slr0925 single-stranded DNA-binding protein		1	8	8	8	75.2	75.2	75.2	13.656	121	17.4602	17.4638	17.3583	17.4274	17.428	17.4589	17.4624	17.4498	1.01561	0.591176
slr0927;sll0849	slr0927;sll0849	5;5	5;5	5;5	slr0927 photosystem II reaction center D2 protein;sll0849 photosystem II reaction center D2 protein		2	5	5	5	20.5	20.5	20.5	39.492	352	19.5866	19.5708	19.654	19.6038	19.5829	19.557	19.5588	19.5662	0.974297	0.275636
slr0929	slr0929	6	6	6	slr0929 chromosome partitioning protein, ParA family		1	6	6	6	36.4	36.4	36.4	21.699	195	16.4257	16.4021	16.4561	16.428	16.4429	16.4263	16.4714	16.4469	1.01321	0.408018
slr0930	slr0930	10	10	10	slr0930 hypothetical protein		1	10	10	10	29.1	29.1	29.1	49.359	436	16.4213	16.3927	16.5475	16.4538	16.3049	16.3484	16.3806	16.3447	0.927128	0.13437
slr0935	slr0935	4	4	4	slr0935 hypothetical protein		1	4	4	4	35.5	35.5	35.5	16.411	152	16.8644	17.0238	16.6491	16.8458	16.7738	16.8672	16.8477	16.8296	0.988831	0.897
slr0936	slr0936	5	5	5	slr0936 nicotinate-nucleotide pyrophosphorylase		1	5	5	5	18.6	18.6	18.6	31.973	295	15.7804	15.8139	15.8151	15.8031	15.9768	15.8725	15.9066	15.9186	1.08335	0.0502137
slr0937	slr0937	9	9	9	slr0937 unknown protein		1	9	9	9	23.7	23.7	23.7	46.1	417	14.6496	14.7371	14.8192	14.7353	15.0091	15.0422	15.0333	15.0282	1.2251	0.0231603
slr0938	slr0938	9	9	8	slr0938 probable UDP-N-acetylmuramyl tripeptide synthetase		1	9	9	8	22.4	22.4	20.3	50.226	459	16.4701	16.4896	16.6885	16.5494	16.5616	16.5677	16.5551	16.5615	1.00839	0.8789
slr0940	slr0940	16	16	16	slr0940 zeta-carotene desaturase		1	16	16	16	37.6	37.6	37.6	54.369	489	17.0672	17.1008	17.1935	17.1205	17.1904	17.188	17.1921	17.1902	1.04947	0.206319
slr0941	slr0941	3	3	3	slr0941 hypothetical protein		1	3	3	3	27.2	27.2	27.2	17.215	147	14.4345	14.4313	14.4206	14.4288	14.4491	14.4695	14.5401	14.4862	1.04061	0.170021
slr0942	slr0942	8	8	8	slr0942 alcohol dehydrogenase [NADP+]		1	8	8	8	28.1	28.1	28.1	36.014	327	16.8818	16.9142	16.8837	16.8932	16.9243	16.9702	16.9753	16.9566	1.04491	0.0382622
slr0943	slr0943	12	12	12	slr0943 fructose-bisphosphate aldolase, class I		1	12	12	12	47	47	47	33.149	300	17.8542	17.8772	18.0458	17.9257	17.9107	17.9331	17.9355	17.9265	1.0005	0.991521
slr0946	slr0946	2	2	2	slr0946 arsenate reductase		1	2	2	2	16	16	16	14.443	131	11.8324	12.0689	11.8452	11.9155	11.8589	11.9081	12.0967	11.9546	1.02748	0.729951
slr0947	slr0947	10	10	10	slr0947 response regulator for energy transfer from phycobilisomes to photosystems		1	10	10	10	48.3	48.3	48.3	26.264	234	16.9903	16.9876	16.9554	16.9777	16.9549	16.9228	16.8721	16.9166	0.95849	0.110255
slr0948	slr0948	7	7	7	slr0948 hypothetical protein		1	7	7	7	38.6	38.6	38.6	23.83	215	17.1455	17.1096	17.1773	17.1441	17.1075	17.0134	17.0625	17.0611	0.944102	0.0747202
slr0949	slr0949	2	2	2	slr0949 Integral membrane protein of the ABC-type Nat permease for neutral amino acids NatD		1	2	2	2	8	8	8	31.133	286	15.0373	15.0494	15.0017	15.0295	15.0082	15.0784	14.9875	15.0247	0.996679	0.886823
slr0950	slr0950	4	4	4	slr0950 hemolysin-like protein		1	4	4	4	19.3	19.3	19.3	30.026	274	14.4027	14.4355	14.4487	14.4289	14.3931	14.363	14.314	14.3567	0.951161	0.067728
slr0951	slr0951	7	7	7	slr0951 4-diphosphocytidyl-2C-methyl-D-erythritol synthase		1	7	7	7	37.8	37.8	37.8	24.643	230	15.5847	15.661	15.7591	15.6683	15.5383	15.561	15.5968	15.5654	0.931143	0.169186
slr0952	slr0952	13	13	13	slr0952 fructose-1,6-bisphosphatase		1	13	13	13	51.3	51.3	51.3	38.262	347	16.8896	16.8372	16.7568	16.8278	16.9171	16.8198	16.8687	16.8685	1.02859	0.446617
slr0953	slr0953	2	2	2	slr0953 sucrose-phosphate phosphatase		1	2	2	2	9	9	9	27.762	244	14.0684	14.0304	13.9815	14.0268	14.0048	13.9685	13.9875	13.987	0.972787	0.250429
slr0955	slr0955	10	10	10	slr0955 probable tRNA/rRNA methyltransferase		1	10	10	10	29.4	29.4	29.4	42.844	384	16.0865	16.1135	16.1176	16.1059	16.7278	16.673	16.6775	16.6928	1.50199	6.51997e-05
slr0958	slr0958	13	13	13	slr0958 cysteinyl-tRNA synthetase		1	13	13	13	29	29	29	53.967	483	18.3444	18.2978	18.2481	18.2968	18.2729	18.25	18.2492	18.2574	0.973072	0.289972
slr0959	slr0959	4	4	4	slr0959 hypothetical protein		1	4	4	4	13.8	13.8	13.8	57.992	529	14.8736	14.9419	14.9206	14.9121	14.8762	14.9931	14.9453	14.9382	1.0183	0.551382
slr0960	slr0960	1	1	1	slr0960 unknown protein		1	1	1	1	6.8	6.8	6.8	17.41	146	12.5025	12.4491	12.2999	12.4172	12.2444	12.2503	12.2405	12.2451	0.887553	0.104642
slr0962	slr0962	12	12	12	slr0962 unknown protein		1	12	12	12	18	18	18	51.836	477	17.9703	17.9495	18.0381	17.986	18.0728	18.0309	18.0803	18.0613	1.05364	0.0870432
slr0963	slr0963	28	28	28	slr0963 ferredoxin-sulfite reductase		1	28	28	28	49.9	49.9	49.9	71.44	635	19.4718	19.4874	19.4483	19.4692	19.4625	19.5566	19.5344	19.5178	1.03429	0.222535
slr0964	slr0964	2	2	2	slr0964 hypothetical protein		1	2	2	2	7.5	7.5	7.5	32.538	308	11.5386	11.6998	11.6472	11.6285	11.8078	11.528	11.7861	11.7073	1.05612	0.494139
slr0965	slr0965	10	10	10	slr0965 DNA polymerase III beta subunit		1	10	10	10	38.6	38.6	38.6	42.087	391	17.4373	17.4036	17.5672	17.4694	17.5425	17.5061	17.5414	17.53	1.04291	0.347989
slr0966	slr0966	7	7	7	slr0966 tryptophan synthase alpha chain		1	7	7	7	36.4	36.4	36.4	28.023	264	15.8649	15.9025	15.8563	15.8746	15.7433	15.7754	15.8039	15.7742	0.932806	0.0123499
slr0967	slr0967	2	2	2	slr0967 hypothetical protein		1	2	2	2	27.3	27.3	27.3	15.469	150	12.4983	12.462	12.5403	12.5002	12.5432	12.5004	12.6653	12.5697	1.04931	0.296831
slr0969	slr0969	9	9	9	slr0969 precorrin methylase		1	9	9	9	17.5	17.5	17.5	67.61	627	16.2031	16.2868	16.1255	16.2052	16.1136	16.3035	16.3164	16.2445	1.02765	0.652782
slr0971	slr0971	9	9	9	slr0971 hypothetical protein		1	9	9	9	25.5	25.5	25.5	49.667	451	15.4265	15.5086	15.5043	15.4798	15.3693	15.4686	15.4663	15.4347	0.969232	0.348053
slr0974	slr0974	9	9	9	slr0974 initiation factor IF-3		1	9	9	9	57.1	57.1	57.1	20.559	177	17.6253	17.7178	17.6667	17.67	17.6701	17.7573	17.782	17.7365	1.04718	0.202617
slr0977	slr0977	1	1	1	slr0977 ABC transporter, permease component		1	1	1	1	4.3	4.3	4.3	31.542	276	14.6528	14.6295	14.6327	14.6383	14.6431	14.6412	14.7309	14.6717	1.02343	0.376342
slr0978	slr0978	1	1	1	slr0978 hypothetical protein		1	1	1	1	5.2	5.2	5.2	15.99	135	10.7991	11.0305	10.8132	10.881	10.9631	10.9452	11.1159	11.0081	1.09212	0.247477
slr0982	slr0982	10	10	10	slr0982 probable polysaccharide ABC transporter ATP binding subunit		1	10	10	10	20.9	20.9	20.9	47.863	430	15.9188	15.9413	15.8638	15.908	16.0136	15.9076	15.8738	15.9317	1.01655	0.654452
slr0983	slr0983	5	5	5	slr0983 glucose-1-phosphate cytidylyltransferase		1	5	5	5	17.2	17.2	17.2	28.793	256	14.6442	14.6115	14.7633	14.673	14.414	14.3044	14.4097	14.376	0.813957	0.00824476
slr0984	slr0984	10	10	10	slr0984 CDP-glucose 4,6-dehydratase		1	10	10	10	31.1	31.1	31.1	40.074	360	17.2614	17.1814	17.2637	17.2355	17.2084	17.0884	17.1196	17.1388	0.935184	0.103441
slr0985	slr0985	4	4	4	slr0985 dTDP-4-dehydrorhamnose 3,5-epimerase		1	4	4	4	24.9	24.9	24.9	20.942	189	15.4759	15.4122	15.6469	15.5117	15.4199	15.3028	15.2518	15.3248	0.878531	0.10279
slr0989	slr0989	7	7	7	slr0989 hypothetical protein		1	7	7	7	35.2	35.2	35.2	27.62	253	15.0579	15.0452	15.0215	15.0415	15.0272	14.9583	14.9844	14.99	0.964913	0.106831
slr0990	slr0990	5	5	5	slr0990 hypothetical protein		1	5	5	5	10.8	10.8	10.8	44.072	389	15.8547	15.8627	15.9704	15.8959	15.8571	15.9261	15.9438	15.909	1.00913	0.790101
slr0992	slr0992	2	2	2	slr0992 probable tRNA/rRNA methyltransferase		1	2	2	2	25.5	25.5	25.5	17.033	153	13.4706	13.5337	12.6212	13.2085	12.4039	12.4768	12.5212	12.4673	0.598247	0.126153
slr0993	slr0993	1	1	1	slr0993 putative peptidase		1	1	1	1	1.1	1.1	1.1	75.376	715				#DIV/0!				#DIV/0!	#DIV/0!	#DIV/0!
slr1019	slr1019	1	1	1	slr1019 phenazine biosynthetic protein PhzF homolog		1	1	1	1	5.7	5.7	5.7	34.109	314	12.3124	12.2508	12.3881	12.3171	11.4835	11.5316	11.7949	11.6033	0.609735	0.00940831
slr1020	slr1020	16	16	16	slr1020 sulfolipid biosynthesis protein SqdB		1	16	16	16	48	48	48	43.202	383	19.4272	19.4044	19.9335	19.5884	19.5598	19.5203	19.4716	19.5172	0.951893	0.721693
slr1022	slr1022	12	12	12	slr1022 N-acetylornithine aminotransferase		1	12	12	12	34.7	34.7	34.7	46.567	429	17.2917	17.2973	17.3721	17.3204	17.3507	17.3204	17.3023	17.3245	1.00284	0.898301
slr1024	slr1024	5	5	4	slr1024 fibrillin		1	5	5	4	20.7	20.7	16.4	23.648	213	15.9596	16.0539	16.1836	16.0657	16.1986	16.1704	16.1696	16.1795	1.08208	0.219768
slr1028	slr1028	6	6	6	slr1028 unknown protein		1	6	6	6	1.9	1.9	1.9	418.28	3972	15.3307	15.3778	15.3144	15.341	15.3714	15.3839	15.3887	15.3813	1.02836	0.16046
slr1030	slr1030	19	19	19	slr1030 magnesium protoporphyrin IX chelatase subunit I		1	19	19	19	56	56	56	39.463	357	18.2059	18.1895	18.2418	18.2124	18.2226	18.1626	18.198	18.1944	0.987609	0.483551
slr1031	slr1031	10	10	10	slr1031 tyrosyl tRNA synthetase		1	10	10	10	26	26	26	44.901	404	16.6604	16.7069	16.5111	16.6261	16.4702	16.6331	16.598	16.5671	0.959894	0.487478
slr1032	slr1032	4	4	4	slr1032 unknown protein		1	4	4	4	51.3	51.3	51.3	13.04	117	12.9704	13.0031	12.9483	12.974	12.6766	12.7665	12.8419	12.7617	0.863182	0.0363693
slr1033	slr1033	5	5	5	slr1033 unknown protein		1	5	5	5	12.4	12.4	12.4	64.181	565	15.7326	15.6862	15.6765	15.6984	15.7221	15.6412	15.6362	15.6665	0.978118	0.395223
slr1034	slr1034	6	6	6	slr1034 hypothetical protein YCF41		1	6	6	6	41.1	41.1	41.1	14.408	129	17.2079	17.2607	17.256	17.2415	17.2864	17.3344	17.2957	17.3055	1.04531	0.0471144
slr1035	slr1035	5	5	5	slr1035 hypothetical protein		1	5	5	5	18.9	18.9	18.9	19.903	175	15.4645	15.6317	15.5808	15.559	15.4831	15.4451	15.526	15.4847	0.949812	0.27215
slr1037	slr1037	5	5	5	slr1037 two-component response regulator CheY subfamily		1	5	5	5	33.6	33.6	33.6	14.322	131	15.4065	15.3793	15.4461	15.4106	15.4102	15.3715	15.3669	15.3829	0.980934	0.314315
slr1039	slr1039	4	4	4	slr1039 hypothetical protein		1	4	4	4	20.2	20.2	20.2	26.104	233	15.6156	15.6404	15.5806	15.6122	15.712	15.7443	15.6691	15.7085	1.069	0.0279036
slr1041	slr1041	5	5	5	slr1041 two-component response regulator PatA subfamily		1	5	5	5	14.9	14.9	14.9	43.923	388	16.2695	16.3013	16.3017	16.2908	16.2611	16.2637	16.2458	16.2569	0.976726	0.0660215
slr1042	slr1042	8	8	8	slr1042 two-component response regulator CheY subfamily		1	8	8	8	65.3	65.3	65.3	13.675	121	17.3781	17.4078	17.4283	17.4047	17.3451	17.3612	17.3353	17.3472	0.960893	0.0392053
slr1043	slr1043	3	3	3	slr1043 similar to chemotaxis protein CheW		1	3	3	3	18.2	18.2	18.2	20.682	187	14.2759	14.2279	14.0916	14.1985	14.2191	14.2004	14.1845	14.2014	1.00201	0.963271
slr1044	slr1044	16	16	16	slr1044 methyl-accepting chemotaxis protein, required for the biogenesis of thick pilli		1	16	16	16	22	22	22	93.209	869	17.6826	17.6874	17.7129	17.6943	17.8316	17.7885	17.7966	17.8056	1.08017	0.00341917
slr1046	slr1046	7	7	7	slr1046 putative TatA protein		1	7	7	7	31	31	31	13.673	126	16.5926	16.7	16.5254	16.606	16.669	16.6165	16.625	16.6368	1.0216	0.613059
slr1047	slr1047	8	8	8	slr1047 hypothetical protein		1	8	8	8	16.4	16.4	16.4	52.819	464	14.4053	14.4103	14.4141	14.4099	14.6509	14.5548	14.5752	14.5937	1.13584	0.0236682
slr1048	slr1048	14	14	14	slr1048 hypothetical protein		1	14	14	14	14.1	14.1	14.1	116.21	1006	16.0862	16.0333	16.1368	16.0854	15.9812	15.969	15.9841	15.9781	0.92831	0.0663695
slr1051	slr1051	12	12	12	slr1051 enoyl-[acyl-carrier-protein] reductase		1	12	12	12	70.5	70.5	70.5	27.625	258	18.7509	18.6636	18.6503	18.6883	18.7674	18.657	18.7333	18.7192	1.02169	0.53257
slr1052	slr1052	6	6	6	slr1052 hypothetical protein		1	6	6	6	37.6	37.6	37.6	19.47	170	15.9535	15.6282	16.1635	15.9151	15.9807	15.7757	15.8554	15.8706	0.969639	0.809569
slr1053	slr1053	7	7	7	slr1053 unknown protein		1	7	7	7	31.5	31.5	31.5	29.848	267	16.222	16.2776	16.19	16.2299	16.2013	16.2938	16.2652	16.2534	1.01648	0.563105
slr1055	slr1055	37	37	37	slr1055 magnesium protoporphyrin IX chelatase subunit H		1	37	37	37	32.7	32.7	32.7	148.55	1331	18.4211	18.4134	18.4685	18.4344	18.4104	18.4433	18.4211	18.4249	0.993496	0.664883
slr1056	slr1056	13	13	13	slr1056 unknown protein		1	13	13	13	17.1	17.1	17.1	77.837	672	16.7863	16.7697	16.7511	16.769	16.8081	16.8161	16.8306	16.8183	1.03471	0.0207958
slr1063	slr1063	7	7	7	slr1063 probable glycosyltransferase		1	7	7	7	9.4	9.4	9.4	79.962	689	15.857	15.7809	15.7585	15.7988	15.8118	15.763	15.7926	15.7891	0.993321	0.789537
slr1064	slr1064	7	7	7	slr1064 probable glycosyltransferase		1	7	7	7	18	18	18	41.848	367	15.3101	15.2195	15.1998	15.2431	15.1821	15.1531	15.1225	15.1525	0.93914	0.0987882
slr1065	slr1065	5	5	5	slr1065 probable glycosyltransferase		1	5	5	5	16.2	16.2	16.2	37.772	321	17.0694	17.0509	16.9938	17.038	16.8105	16.8212	16.7137	16.7818	0.837269	0.0052825
slr1066	slr1066	11	11	11	slr1066 unknown protein		1	11	11	11	30.4	30.4	30.4	45.95	401	17.8815	17.8378	17.9061	17.8751	17.6386	17.6463	18.0799	17.7883	0.941575	0.613037
slr1067	slr1067	9	9	9	slr1067 UDP-glucose 4-epimerase		1	9	9	9	26.5	26.5	26.5	37.495	340	16.2401	16.1817	16.1246	16.1821	16.0499	16.1539	16.1327	16.1122	0.952654	0.203198
slr1070	slr1070	3	3	3	slr1070 unknown protein		1	3	3	3	14.7	14.7	14.7	33.16	285	14.176	14.289	14.1868	14.2173	14.063	14.0497	14.0013	14.038	0.883125	0.0213746
slr1071	slr1071	5	5	5	slr1071 unknown protein		1	5	5	5	21.6	21.6	21.6	30.875	268	17.505	17.5007	17.4434	17.483	17.5152	17.4639	17.4722	17.4837	1.0005	0.978984
slr1072	slr1072	2	2	2	slr1072 GDP-D-mannose dehydratase		1	2	2	2	2.8	2.8	2.8	35.702	320	14.2284	14.1587	14.0886	14.1586	14.1533	14.1592	14.1096	14.1407	0.987684	0.711411
slr1073	slr1073	2	2	2	slr1073 unknown protein		1	2	2	2	7.3	7.3	7.3	43.527	384	13.3945	13.2683	13.3463	13.3364	13.3055	13.1135	13.2097	13.2095	0.915824	0.139811
slr1076	slr1076	6	6	6	slr1076 probable glycosyltransferase		1	6	6	6	16.5	16.5	16.5	43.374	381	16.2589	16.2411	16.3816	16.2939	16.2557	16.2383	16.2775	16.2572	0.974876	0.496722
slr1077	slr1077	4	4	4	slr1077 probable glycosyltransferase		1	4	4	4	12.4	12.4	12.4	43.52	386	14.3565	14.2276	14.3384	14.3075	13.7973	13.8977	14.0347	13.9099	0.759132	0.0129974
slr1079	slr1079	1	1	1	slr1079 unknown protein		1	1	1	1	6.1	6.1	6.1	19.037	164				#DIV/0!				#DIV/0!	#DIV/0!	#DIV/0!
slr1081	slr1081	6	6	6	slr1081 hypothetical protein		1	6	6	6	32.9	32.9	32.9	23.888	210	15.7789	15.8645	15.912	15.8518	15.7556	15.8139	15.7743	15.7813	0.9523	0.204372
slr1083	slr1083	3	3	3	slr1083 hypothetical protein		1	3	3	3	20.4	20.4	20.4	20.978	181	13.9705	13.9746	14.0511	13.9987	14.1202	14.1396	14.1681	14.1426	1.10487	0.016167
slr1085	slr1085	6	6	6	slr1085 probable glycosyltransferase		1	6	6	6	14.2	14.2	14.2	47.383	424	16.1539	16.1441	16.2879	16.1953	16.1916	16.213	16.204	16.2029	1.00526	0.885919
slr1087	slr1087	3	3	3	slr1087 hypothetical protein		1	3	3	3	9.7	9.7	9.7	39.395	361	15.2991	15.1529	15.6254	15.3592	15.2289	15.285	15.3382	15.284	0.94924	0.647707
slr1090	slr1090	7	7	7	slr1090 GTP-binding protein		1	7	7	7	22.8	22.8	22.8	39.206	368	15.8135	15.7446	15.7975	15.7852	15.7497	15.6702	15.7329	15.7176	0.954251	0.103156
slr1094	slr1094	6	6	6	slr1094 hypothetical protein		1	6	6	6	29.5	29.5	29.5	29.518	261	15.3028	15.2742	15.5803	15.3858	15.6198	15.5465	15.6588	15.6084	1.16685	0.139432
slr1095	slr1095	4	4	4	slr1095 hypothetical protein		1	4	4	4	21.4	21.4	21.4	25.034	215	14.0429	13.9309	14.0214	13.9984	13.9454	13.8648	13.9517	13.9207	0.947533	0.156814
slr1096	slr1096	20	20	20	slr1096 dihydrolipoamide dehydrogenase		1	20	20	20	60.5	60.5	60.5	50.832	474	18.6949	18.7534	18.6396	18.696	18.6741	18.7825	18.7738	18.7435	1.03344	0.377593
slr1097	slr1097	5	5	5	slr1097 hypothetical protein		1	5	5	5	30.7	30.7	30.7	19.003	163	15.7223	15.7821	16.0911	15.8652	15.7009	15.7722	15.7849	15.7527	0.924993	0.430243
slr1098	slr1098	2	2	2	slr1098 hypothetical protein		1	2	2	2	6	6	6	27.675	252	15.0107	14.8846	14.934	14.9431	14.8664	14.8946	14.8797	14.8802	0.957354	0.224947
slr1099	slr1099	6	6	6	slr1099 3-octaprenyl-4-hydroxybenzoate carboxy-lyase		1	6	6	6	31.1	31.1	31.1	22.172	206	15.7184	15.7169	15.7465	15.7273	15.7043	15.7931	15.7332	15.7435	1.01132	0.607863
slr1100	slr1100	4	4	4	slr1100 hypothetical protein		1	4	4	4	40.5	40.5	40.5	14.893	126	13.712	13.7241	13.7314	13.7225	13.6142	13.5879	13.4988	13.5669	0.897776	0.0437095
slr1101	slr1101	1	1	1	slr1101 hypothetical protein		1	1	1	1	7.5	7.5	7.5	17.83	161	12.1205	12.3709	12.092	12.1945	11.9268	12.259	12.052	12.0793	0.923246	0.430026
slr1102	slr1102	21	20	20	slr1102 hypothetical protein		1	21	20	20	23.9	23.1	23.1	96.638	853	18.3178	18.3477	18.1815	18.2823	18.2852	18.3968	18.376	18.3527	1.04996	0.325369
slr1103	slr1103	21	21	20	slr1103 hypothetical protein		1	21	21	20	35.1	35.1	34.1	79.83	706	17.7073	17.7426	17.465	17.6383	17.5113	17.635	17.6109	17.5857	0.964212	0.622384
slr1104	slr1104	16	16	16	slr1104 hypothetical protein		1	16	16	16	27.6	27.6	27.6	69.333	613	17.8967	17.9299	17.9284	17.9183	17.9359	17.911	17.9382	17.9284	1.00698	0.511714
slr1105	slr1105	17	17	17	slr1105 GTP-binding protein TypA/BipA homolog		1	17	17	17	37.5	37.5	37.5	61.821	558	17.9528	17.9603	18.0384	17.9838	17.8524	17.8585	17.853	17.8546	0.914333	0.0414526
slr1106	slr1106	17	17	17	slr1106 prohibitin		1	17	17	17	59.6	59.6	59.6	30.569	282	18.6743	18.6547	18.6945	18.6745	18.6494	18.6289	18.6276	18.6353	0.973216	0.0547539
slr1107	slr1107	4	4	4	slr1107 unknown protein		1	4	4	4	9	9	9	50.979	444	12.9869	12.9691	13.1413	13.0324	13.361	13.1475	13.2334	13.2473	1.16062	0.0610544
slr1109	slr1109	6	6	6	slr1109 similar to ankyrin		1	6	6	6	16.8	16.8	16.8	46.817	441	15.6074	15.6733	15.6908	15.6572	15.4922	15.5134	15.5202	15.5086	0.902136	0.0195666
slr1110	slr1110	3	3	3	slr1110 hypothetical protein		1	3	3	3	26	26	26	21.664	192	16.2622	16.2956	16.2487	16.2689	16.2073	16.2508	16.2331	16.2304	0.973702	0.111221
slr1114	slr1114	2	2	2	slr1114 hypothetical protein		1	2	2	2	4.4	4.4	4.4	65.519	585	13.2751	13.252	13.3792	13.3021	12.7821	12.7871	12.7231	12.7641	0.688728	0.0011468
slr1115	slr1115	2	2	2	slr1115 probable methyltransferase		1	2	2	2	8.6	8.6	8.6	28.672	257	14.1641	14.2509	14.2811	14.232	13.962	14.3532	14.2416	14.1856	0.96831	0.733923
slr1116	slr1116	3	3	3	slr1116 hypothetical protein		1	3	3	3	17.3	17.3	17.3	20.103	173	15.8435	15.8485	15.8284	15.8401	15.6762	15.6336	15.6164	15.6421	0.871725	0.00417464
slr1117	slr1117	3	3	3	slr1117 hypothetical protein		1	3	3	3	11.5	11.5	11.5	28.845	253	14.6198	14.6002	14.5638	14.5946	14.4633	14.4771	14.3873	14.4426	0.89997	0.015423
slr1118	slr1118	1	1	1	slr1118 probable UDP-N-acetyl-D-mannosaminuronic acid transferase		1	1	1	1	7.2	7.2	7.2	28.135	251	15.2221	15.5724	16.0186	15.6043	15.6411	15.7389	15.8014	15.7271	1.08885	0.650122
slr1119	slr1119	2	2	2	slr1119 hypothetical protein		1	2	2	2	9.9	9.9	9.9	26.646	233	11.5177	11.4759	11.34	11.4445	11.5687	11.5121	11.4961	11.5256	1.05783	0.267148
slr1122	slr1122	5	5	5	slr1122 hypothetical protein		1	5	5	5	18.4	18.4	18.4	28.176	250	14.4019	14.3617	14.2775	14.347	14.4686	14.3636	14.3837	14.4053	1.04118	0.299666
slr1123	slr1123	8	8	8	slr1123 guanylate kinase		1	8	8	8	41.9	41.9	41.9	21.427	191	16.3022	16.3255	16.3312	16.3196	16.2581	16.2795	16.2881	16.2752	0.969705	0.0242573
slr1124	slr1124	10	10	10	slr1124 phosphoglycerate mutase		1	10	10	10	27.8	27.8	27.8	49.344	443	17.3185	17.3515	17.2551	17.3083	17.33	17.2748	17.3273	17.3107	1.00164	0.947827
slr1125	slr1125	9	9	9	slr1125 probable glucosyl transferase		1	9	9	9	27.9	27.9	27.9	43.534	402	17.3182	17.2848	17.3453	17.3161	17.3157	17.3348	17.3407	17.3304	1.00995	0.512624
slr1127	slr1127	2	2	2	slr1127 unknown protein		1	2	2	2	21.7	21.7	21.7	28.171	263	12.158	12.2669	12.3465	12.2571	12.4962	12.1534	12.4364	12.362	1.07539	0.443109
slr1128	slr1128	20	20	20	slr1128 hypothetical protein		1	20	20	20	66.7	66.7	66.7	35.727	321	18.0793	18.0678	18.115	18.0874	18.17	18.1717	18.1971	18.1796	1.06605	0.00877862
slr1129	slr1129	25	25	25	slr1129 ribonuclease E		1	25	25	25	46.6	46.6	46.6	74.944	674	17.8307	17.8476	17.7947	17.8243	17.761	17.7717	17.7886	17.7738	0.965565	0.0635527
slr1133	slr1133	14	14	14	slr1133 L-argininosuccinate lyase		1	14	14	14	29.7	29.7	29.7	50.947	461	17.959	17.9561	17.9112	17.9421	17.94	17.9325	17.9248	17.9324	0.993308	0.600681
slr1135	slr1135	1	1	1	slr1135 unknown protein		1	1	1	1	1.3	1.3	1.3	85.345	715	10.3012	10.4292	10.3817	10.3707	10.3818	10.528	10.6484	10.5194	1.10859	0.184391
slr1137	slr1137	3	3	3	slr1137 cytochrome c oxidase subunit I		1	3	3	3	6	6	6	61.348	551	14.3045	14.3298	14.2709	14.3017	14.341	14.3639	14.3849	14.3633	1.04358	0.0487393
slr1138	slr1138	1	1	1	slr1138 cytochrome c oxidase subunit III		1	1	1	1	3.9	3.9	3.9	26.083	233	12.0635	12.4288	12.2416	12.2446	12.2689	12.2617	12.8335	12.4547	1.15671	0.401366
slr1139	slr1139	5	5	5	slr1139 thioredoxin		1	5	5	5	52.3	52.3	52.3	12.171	109	17.4074	17.4894	17.2399	17.3789	17.1458	17.3123	17.2872	17.2484	0.913542	0.227829
slr1140	slr1140	12	12	12	slr1140 DegT/DnrJ/EryC1/StrS family protein		1	12	12	12	45.5	45.5	45.5	41.559	378	17.4992	17.5203	17.5668	17.5288	17.5578	17.5661	17.5808	17.5683	1.02773	0.178151
slr1142	slr1142	4	4	4	slr1142 hypothetical protein		1	4	4	4	25.4	25.4	25.4	19.357	169	14.7303	14.8023	14.7207	14.7511	14.7953	14.9321	14.9908	14.9061	1.11341	0.0994618
slr1143	slr1143	12	12	12	slr1143 hypothetical protein		1	12	12	12	36.7	36.7	36.7	38.761	343	16.7603	16.7695	16.6749	16.7349	16.7919	16.8322	16.8281	16.8174	1.05883	0.0955533
slr1145	slr1145	2	2	2	slr1145 Monocomponent sodium-dependent glutamate permease GltS		1	2	2	2	4.2	4.2	4.2	42.922	402	13.3	13.3957	13.374	13.3566	13.3429	13.2788	13.4571	13.3596	1.00211	0.96237
slr1147	slr1147	1	1	1	slr1147 two-component sensor histidine kinase		1	1	1	1	2.3	2.3	2.3	47.575	434	11.1859	11.3782	11.1112	11.2251	11.3548	11.4948	11.5583	11.4693	1.18446	0.0751758
slr1149	slr1149	10	10	10	slr1149 ATP-binding protein of ABC transporter		1	10	10	10	18.3	18.3	18.3	67.374	601	15.1867	15.1994	15.2315	15.2058	15.2238	15.2263	15.2943	15.2481	1.02975	0.20543
slr1150	slr1150	3	3	3	slr1150 unknown protein		1	3	3	3	19.4	19.4	19.4	18.995	170	14.8505	14.7541	14.759	14.7878	14.3568	14.5902	14.5346	14.4938	0.815636	0.0365301
slr1152	slr1152	3	3	3	slr1152 hypothetical protein		1	3	3	3	12.1	12.1	12.1	36.224	331	15.5633	15.4564	15.7033	15.5744	15.8352	15.659	15.9796	15.8246	1.18942	0.10377
slr1159	slr1159	14	14	14	slr1159 glycinamide ribonucleotide synthetase		1	14	14	14	44.4	44.4	44.4	44.016	419	17.4218	17.5235	17.3664	17.4372	17.3401	17.4679	17.4133	17.4071	0.979325	0.637761
slr1160	slr1160	6	6	6	slr1160 periplasmic protein, function unknown		1	6	6	6	28.9	28.9	28.9	22.261	204	16.9632	17.0072	16.971	16.9804	17.2841	17.2732	17.2517	17.2697	1.222	0.000133485
slr1161	slr1161	5	5	5	slr1161 hypothetical protein		1	5	5	5	31.2	31.2	31.2	22.952	199	15.7848	15.7481	15.7043	15.7457	15.8505	15.775	15.8032	15.8096	1.04524	0.117329
slr1162	slr1162	3	3	3	slr1162 unknown protein		1	3	3	3	14	14	14	36.863	314	16.9628	16.8274	16.7259	16.8387	16.6473	16.5722	16.5309	16.5834	0.837836	0.0462769
slr1164	slr1164	4	4	4	slr1164 ribonucleotide reductase subunit alpha		1	4	4	4	5.5	5.5	5.5	85.636	767	14.5124	14.5175	14.432	14.4873	14.5524	14.5241	14.8553	14.6439	1.11471	0.274756
slr1165	slr1165	13	13	13	slr1165 sulfate adenylyltransferase		1	13	13	13	33.8	33.8	33.8	43.695	390	18.1975	18.2704	18.1993	18.2224	18.2316	18.2582	18.2484	18.2461	1.01652	0.432958
slr1166	slr1166	3	3	3	slr1166 UDP-glucose:tetrahydrobiopterin glucosyltransferase		1	3	3	3	12.1	12.1	12.1	39.289	354	13.9206	13.8305	13.6816	13.8109	13.8349	13.8243	13.6172	13.7588	0.964514	0.627574
slr1167	slr1167	6	6	6	slr1167 glycerol dehydrogenase		1	6	6	6	17.8	17.8	17.8	39.779	371	15.6633	15.6198	15.735	15.6727	15.4117	15.4405	15.4378	15.43	0.84515	0.0136517
slr1169	slr1169	8	8	8	slr1169 unknown protein		1	8	8	8	45	45	45	30.966	278	14.2136	14.2349	14.1458	14.1981	14.1429	14.2067	14.3066	14.2187	1.01439	0.73014
slr1171	slr1171	4	4	4	slr1171 glutathione peroxidase-like NADPH peroxidase,glutathione peroxidase		1	4	4	4	37.3	37.3	37.3	18.452	169	17.5115	17.5848	17.535	17.5437	17.4567	17.5941	17.5667	17.5392	0.996832	0.928868
slr1173	slr1173	9	9	9	slr1173 hypothetical protein		1	9	9	9	25.7	25.7	25.7	52.541	463	16.748	16.7305	16.6979	16.7255	16.5652	16.5551	16.6067	16.5757	0.901381	0.00230061
slr1176	slr1176	23	23	23	slr1176 glucose-1-phosphate adenylyltransferase		1	23	23	23	58.5	58.5	58.5	49.366	439	19.4607	19.479	19.4542	19.4646	19.4053	19.4799	19.6245	19.5032	1.0271	0.610472
slr1177	slr1177	2	2	2	slr1177 hypothetical protein		1	2	2	2	7.8	7.8	7.8	30.757	282	15.7029	15.6408	15.6247	15.6561	15.7823	15.6988	15.7335	15.7382	1.05853	0.0732734
slr1178	slr1178	3	3	3	slr1178 hypothetical protein		1	3	3	3	32.3	32.3	32.3	16.61	155	14.8535	14.866	14.8649	14.8615	14.7595	14.7585	14.747	14.755	0.928857	4.68625e-05
slr1179	slr1179	10	10	10	slr1179 hypothetical protein		1	10	10	10	31.4	31.4	31.4	41.357	376	16.8544	16.7692	16.6	16.7412	16.8192	16.7094	16.7533	16.7606	1.01357	0.827842
slr1183	slr1183	3	3	3	slr1183 hypothetical protein		1	3	3	3	14.4	14.4	14.4	21.315	194	13.2513	13.1154	13.1405	13.1691	13.1785	13.0287	13.0467	13.0847	0.943179	0.25255
slr1185	slr1185	3	3	3	slr1185 cytochrome b6-f complex alternative iron-sulfur subunit (Rieske iron sulfur protein)		1	3	3	3	21.9	21.9	21.9	18.685	178	15.3054	15.3407	15.2505	15.2989	15.3368	15.3151	15.1545	15.2688	0.979368	0.668884
slr1186	slr1186	2	2	2	slr1186 hypothetical protein		1	2	2	2	12.8	12.8	12.8	16.498	148	14.3846	14.204	14.3514	14.3133	14.7212	14.6427	14.6165	14.6602	1.27175	0.0106185
slr1187	slr1187	2	2	2	slr1187 unknown protein		1	2	2	2	5.2	5.2	5.2	35.872	346	11.2742	11.465	11.1849	11.308	11.0452	10.9576	11.0558	11.0195	0.818753	0.0587762
slr1188	slr1188	6	6	6	slr1188 hypothetical protein		1	6	6	6	27.8	27.8	27.8	25.584	223	15.2609	15.2932	15.3689	15.3077	15.5077	15.4178	15.4339	15.4531	1.10609	0.0272093
slr1192	slr1192	3	3	3	slr1192 probable alcohol dehydrogenase		1	3	3	3	11.3	11.3	11.3	35.868	336	14.8437	14.7657	14.6055	14.7383	14.9477	14.7831	14.7987	14.8432	1.07542	0.301985
slr1194	slr1194	6	6	6	slr1194 hypothetical protein		1	6	6	6	30.2	30.2	30.2	25.17	222	15.677	15.6699	15.68	15.6756	15.7168	15.689	15.6469	15.6843	1.006	0.713677
slr1195	slr1195	2	2	2	slr1195 hypothetical protein		1	2	2	2	16.2	16.2	16.2	18.098	154	13.3916	13.4586	13.448	13.4327	13.2956	13.2501	13.3133	13.2863	0.903494	0.00658721
slr1196	slr1196	10	10	10	slr1196 periplasmic protein, function unknown		1	10	10	10	25.4	25.4	25.4	48.001	429	16.5786	16.5544	16.5504	16.5611	16.5655	16.5661	16.5627	16.5648	1.00252	0.721163
slr1197	slr1197	4	4	4	slr1197 SMF protein		1	4	4	4	11.8	11.8	11.8	43.629	398	14.5715	14.5537	14.5476	14.5576	14.5982	14.479	14.5194	14.5322	0.982522	0.545338
slr1198	slr1198	12	12	12	slr1198 antioxidant protein		1	12	12	12	64	64	64	23.559	211	19.1296	19.1235	19.1139	19.1223	19.0528	19.0696	19.1149	19.0791	0.970483	0.138021
slr1199	slr1199	2	2	2	slr1199 DNA mismatch repair protein MutL		1	2	2	2	3.6	3.6	3.6	63.668	563	13.8047	13.8297	13.9397	13.858	13.6346	13.7713	13.6671	13.691	0.890692	0.0460896
slr1201	slr1201	4	4	4	slr1201 urea transport system permease protein		1	4	4	4	9.3	9.3	9.3	45.084	410	15.8187	15.8155	15.8028	15.8123	15.8533	15.8656	15.8519	15.857	1.03143	0.00249357
slr1203	slr1203	3	3	3	slr1203 hypothetical protein		1	3	3	3	22.1	22.1	22.1	17.066	145	14.6859	14.6539	14.7744	14.7047	14.4168	14.5337	14.5445	14.4983	0.866693	0.01987
slr1204	slr1204	2	2	2	slr1204 protease		1	2	2	2	8.2	8.2	8.2	47.656	452	13.484	13.5558	13.5114	13.5171	13.8946	13.8961	13.7826	13.8578	1.26635	0.0035955
slr1205	slr1205	4	4	4	slr1205 similar to chlorobenzene dioxygenase, ferredoxin component		1	4	4	4	51.3	51.3	51.3	12.512	117	16.1188	16.1668	16.4754	16.2537	16.0601	16.1763	16.3004	16.1789	0.949508	0.605703
slr1206	slr1206	4	4	4	slr1206 hypothetical protein		1	4	4	4	16.6	16.6	16.6	24.064	211	14.9783	15.035	15.1677	15.0603	14.881	14.8621	14.8637	14.8689	0.87574	0.0746633
slr1207	slr1207	14	14	14	slr1207 hypothetical protein		1	14	14	14	28.4	28.4	28.4	55.776	514	16.9235	16.9691	16.9755	16.956	17.1221	17.1044	17.0953	17.1072	1.11049	0.00424019
slr1208	slr1208	17	17	17	slr1208 probable oxidoreductase		1	17	17	17	36.1	36.1	36.1	71.553	657	18.0504	18.0244	17.975	18.0166	17.9332	17.8965	17.8931	17.9076	0.927249	0.0206601
slr1209	slr1209	1	1	1	slr1209 hypothetical protein		1	1	1	1	11	11	11	12.374	109	12.0705	11.8479	12.0815	12	12.2214	12.042	12.2046	12.156	1.11422	0.182067
slr1210	slr1210	3	3	3	slr1210 unknown protein		1	3	3	3	19.4	19.4	19.4	14.936	129	15.2807	15.1688	15.0896	15.1797	15.0463	15.1952	15.1925	15.1447	0.976048	0.661882
slr1211	slr1211	4	4	4	slr1211 cobalt-chelatase subunit CobN		1	4	4	4	3.4	3.4	3.4	123.11	1092	15.5653	15.611	15.6954	15.6239	15.6618	15.692	15.6727	15.6755	1.03639	0.307297
slr1212	slr1212	7	7	7	slr1212 similar to two-component sensor histidine kinase		1	7	7	7	8.8	8.8	8.8	97.342	844	16.1775	16.1179	16.2257	16.1737	16.0399	16.02	16.0478	16.0359	0.908917	0.0399383
slr1213	slr1213	1	1	1	slr1213 two-component response regulator AraC subfamily		1	1	1	1	5.4	5.4	5.4	27.405	241	16.3237	16.6621	17.1452	16.7103	15.8781	16.6316	16.6045	16.3714	0.790625	0.379218
slr1214	slr1214	2	2	2	slr1214 two-component response regulator PatA subfamily		1	2	2	2	8.6	8.6	8.6	42.547	372	13.5087	13.6299	13.537	13.5586	13.5388	13.6313	13.6268	13.599	1.0284	0.443776
slr1216	slr1216	8	8	8	slr1216 Mg2+ transport protein		1	8	8	8	19.4	19.4	19.4	51.1	463	16.6043	16.6334	16.6709	16.6362	16.5367	16.5817	16.5414	16.5533	0.944131	0.0295169
slr1218	slr1218	3	3	3	slr1218 hypothetical protein YCF39		1	3	3	3	22.2	22.2	22.2	17.678	158	16.6276	16.6374	16.8726	16.7126	16.8026	16.8645	16.8255	16.8309	1.08546	0.275327
slr1219	slr1219	4	4	4	slr1219 urease accessory protein E		1	4	4	4	38.7	38.7	38.7	15.867	142	12.4222	12.1971	12.193	12.2708	12.0592	12.2678	12.0369	12.1213	0.901594	0.229741
slr1220	slr1220	10	10	10	slr1220 hypothetical protein		1	10	10	10	37.5	37.5	37.5	36.009	317	17.6838	17.7339	17.779	17.7322	17.7058	17.7586	17.7403	17.7349	1.00187	0.937017
slr1223	slr1223	13	13	13	slr1223 hypothetical protein		1	13	13	13	40.4	40.4	40.4	33.193	307	17.7561	17.7378	18.0643	17.8527	17.6392	17.8295	17.5888	17.6858	0.890753	0.27264
slr1224	slr1224	10	10	10	slr1224 ATP-binding protein of sugar ABC transporter		1	10	10	10	24.8	24.8	24.8	45.183	408	17.7319	17.7418	17.7351	17.7363	17.7784	17.8039	17.8034	17.7952	1.04173	0.0124888
slr1225	slr1225	7	7	7	slr1225 serine/threonine kinase		1	7	7	7	17.6	17.6	17.6	53.872	495	15.1077	15.0766	15.1373	15.1072	15.1172	15.0889	15.1291	15.1117	1.00314	0.842936
slr1226	slr1226	13	13	13	slr1226 phosphoribosyl aminoidazole succinocarboxamide synthetase		1	13	13	13	57.6	57.6	57.6	29.737	264	17.6484	17.6425	17.7037	17.6649	17.5572	17.5752	17.5808	17.5711	0.937073	0.0289248
slr1227	slr1227	16	16	16	slr1227 chloroplastic outer envelope membrane protein homolog		1	16	16	16	23.5	23.5	23.5	92.306	861	18.0805	18.1048	18.0554	18.0802	18.6943	18.6882	18.6388	18.6738	1.50898	1.78994e-05
slr1228	slr1228	17	17	17	slr1228 peptide-chain-release factor 3		1	17	17	17	36.6	36.6	36.6	61.189	547	16.7187	16.7428	16.6449	16.7021	16.6637	16.667	16.6798	16.6702	0.978093	0.391397
slr1230	slr1230	7	7	7	slr1230 hypothetical protein		1	7	7	7	27.2	27.2	27.2	31.234	287	15.6696	15.6583	15.7111	15.6797	15.5375	15.5044	15.5295	15.5238	0.89757	0.00246539
slr1232	slr1232	4	4	4	slr1232 unknown protein		1	4	4	4	30.9	30.9	30.9	19.443	178	14.6379	14.524	14.5596	14.5738	14.4731	14.5164	14.6852	14.5582	0.989253	0.844395
slr1233	slr1233	26	26	26	slr1233 succinate dehydrogenase flavoprotein subunit		1	26	26	26	52.7	52.7	52.7	63.701	575	18.2471	18.1965	18.1526	18.1987	18.2393	18.233	18.2032	18.2252	1.01849	0.443879
slr1234	slr1234	4	4	4	slr1234 protein kinase C inhibitor		1	4	4	4	37.7	37.7	37.7	12.456	114	15.944	16.03	15.9758	15.9832	15.8353	15.9226	15.984	15.9139	0.953094	0.253337
slr1235	slr1235	4	4	4	slr1235 hypothetical protein		1	4	4	4	21.5	21.5	21.5	32.776	293	14.0414	13.9685	14.0053	14.005	13.9214	13.9775	13.9659	13.9549	0.965871	0.141334
slr1236	slr1236	2	2	2	slr1236 hypothetical protein		1	2	2	2	12.4	12.4	12.4	19.109	177	14.9829	15.0523	14.9595	14.9982	14.9446	15.0339	15.0284	15.0023	1.0028	0.924682
slr1237	slr1237	1	1	1	slr1237 cytosine deaminase		1	1	1	1	2	2	2	49.783	450	12.1388	12.1954	12.4322	12.2555	12.0411	12.0625	12.1762	12.0932	0.893633	0.205704
slr1238	slr1238	12	12	12	slr1238 glutathione synthetase		1	12	12	12	53.8	53.8	53.8	35.068	320	16.7279	16.7831	16.7044	16.7385	16.5962	16.7112	16.7733	16.6936	0.969355	0.491787
slr1239	slr1239	14	14	14	slr1239 pyridine nucleotide transhydrogenase alpha subunit		1	14	14	14	28.9	28.9	28.9	56.049	530	17.6547	17.6327	17.7336	17.6736	17.7509	17.7473	17.7486	17.7489	1.05358	0.133028
slr1240	slr1240	9	9	9	slr1240 unknown protein		1	9	9	9	30.2	30.2	30.2	21.06	179	17.4482	17.4701	17.2794	17.3992	17.3677	17.4031	17.367	17.3793	0.986248	0.773894
slr1243	slr1243	23	23	23	slr1243 unknown protein		1	23	23	23	19.6	19.6	19.6	123.59	1064	17.3236	17.3579	17.3718	17.3511	17.395	17.3862	17.3943	17.3919	1.02864	0.0997458
slr1247	slr1247	12	12	12	slr1247 phosphate-binding periplasmic protein precursor (PBP)		1	12	12	12	43.8	43.8	43.8	35.289	333	17.7432	17.6504	17.6989	17.6975	16.6233	16.6748	16.5359	16.6113	0.471018	7.14659e-05
slr1248	slr1248	3	3	3	slr1248 phosphate transport system permease protein PstC homolog		1	3	3	3	5.8	5.8	5.8	34.798	328	14.9018	14.854	14.8735	14.8764	13.9907	14.0905	14.0348	14.0387	0.559516	0.000163714
slr1250	slr1250	7	7	7	slr1250 phosphate transport ATP-binding protein PstB homolog		1	7	7	7	35.4	35.4	35.4	29.909	271	16.3721	16.339	16.4446	16.3852	16.1192	16.1107	16.2711	16.167	0.85962	0.0320808
slr1251	slr1251	7	7	7	slr1251 peptidyl-prolyl cis-trans isomerase		1	7	7	7	47.6	47.6	47.6	18.404	170	18.1299	18.1607	18.1492	18.1466	18.321	18.1505	18.1333	18.2016	1.03885	0.456115
slr1254	slr1254	17	17	17	slr1254 phytoene dehydrogenase (phytoene desaturase)		1	17	17	17	40.5	40.5	40.5	52.92	472	19.0556	19.0201	19.0248	19.0335	19.073	19.0508	19.04	19.0546	1.01471	0.228159
slr1255	slr1255	5	5	5	slr1255 phytoene synthase		1	5	5	5	15.4	15.4	15.4	38.707	337	15.7071	15.7047	15.534	15.6486	15.8129	15.8111	15.7139	15.7793	1.09481	0.136715
slr1256	slr1256	4	4	4	slr1256 urease gamma subunit		1	4	4	4	57	57	57	11.056	100	15.5519	15.6153	15.5403	15.5692	15.5752	15.7528	15.8445	15.7242	1.11345	0.181672
slr1257	slr1257	7	7	7	slr1257 unknown protein		1	7	7	7	20.7	20.7	20.7	43.437	397	14.9041	14.9952	14.9181	14.9391	15.1351	15.1348	15.1028	15.1242	1.13689	0.0136885
slr1258	slr1258	6	6	6	slr1258 unknown protein		1	6	6	6	37.8	37.8	37.8	27.099	251	16.4939	16.4829	16.437	16.4713	16.247	16.2434	16.1774	16.2226	0.841669	0.00126974
slr1259	slr1259	7	7	7	slr1259 hypothetical protein		1	7	7	7	48.3	48.3	48.3	25.747	232	15.5952	15.6191	15.5479	15.5874	15.3509	15.4335	15.4296	15.4047	0.881031	0.00688576
slr1260	slr1260	3	3	3	slr1260 hypothetical protein		1	3	3	3	24.3	24.3	24.3	19.685	177	14.8439	14.9292	14.8515	14.8749	14.5263	14.7014	14.5888	14.6055	0.829677	0.0181876
slr1261	slr1261	9	9	9	slr1261 hypothetical protein		1	9	9	9	59.8	59.8	59.8	19.068	179	16.8744	16.8222	16.6716	16.7894	16.5531	16.5497	16.5395	16.5474	0.84559	0.0571357
slr1263	slr1263	12	12	12	slr1263 hypothetical protein		1	12	12	12	28.1	28.1	28.1	51.701	470	16.5153	16.6487	16.5996	16.5879	16.7246	16.7481	16.7501	16.7409	1.11192	0.053637
slr1265	slr1265	26	26	26	slr1265 RNA polymerase gamma-subunit		1	26	26	26	50	50	50	70.977	626	19.4691	19.4233	19.4361	19.4428	19.3792	19.3571	19.3754	19.3706	0.951142	0.0187684
slr1266	slr1266	1	1	1	slr1266 hypothetical protein		1	1	1	1	10.3	10.3	10.3	19.529	185	10.1186	10.5607	10.4141	10.3644	10.2485	10.269	10.4951	10.3376	0.981538	0.870038
slr1267	slr1267	3	3	3	slr1267 cell division protein FtsW		1	3	3	3	7.1	7.1	7.1	43.038	393	13.0014	13.3362	13.212	13.1832	13.5122	13.2114	13.3316	13.3517	1.12388	0.268955
slr1269	slr1269	4	4	4	slr1269 gamma-glutamyltranspeptidase		1	4	4	4	9.7	9.7	9.7	55.988	518	13.8936	13.7803	13.8567	13.8436	13.6834	13.5521	13.6781	13.6378	0.867113	0.0215651
slr1270	slr1270	14	14	14	slr1270 periplasmic protein, function unknown		1	14	14	14	38.4	38.4	38.4	57.734	526	16.9259	17.0088	17.0479	16.9942	17.335	17.3646	17.3613	17.3536	1.28294	0.00683402
slr1271	slr1271	8	8	8	slr1271 probable UDP-N-acetyl-D-mannosaminuronic acid transferase		1	8	8	8	42.3	42.3	42.3	28.126	246	16.4705	16.4401	16.3927	16.4344	16.3629	16.3748	16.3858	16.3745	0.959295	0.108082
slr1272	slr1272	8	8	8	slr1272 probable porin; major outer membrane protein		1	8	8	8	41.3	41.3	41.3	28.029	254	16.1233	16.1307	16.1047	16.1195	16.807	16.776	16.768	16.7837	1.58459	6.05313e-06
slr1273	slr1273	5	5	5	slr1273 hypothetical protein		1	5	5	5	39.7	39.7	39.7	15.714	146	17.9412	17.903	17.9357	17.9266	17.938	17.9414	17.9433	17.9409	1.00994	0.353529
slr1274	slr1274	10	10	10	slr1274 probable fimbrial assembly protein PilM, required for motility		1	10	10	10	28.6	28.6	28.6	40.879	367	17.6708	17.6721	17.7439	17.6956	17.9208	17.8816	17.8433	17.8819	1.13781	0.00488595
slr1275	slr1275	4	4	4	slr1275 hypothetical protein		1	4	4	4	27.8	27.8	27.8	30.034	284	16.9211	16.8945	16.9497	16.9218	17.1006	17.0609	17.0786	17.0801	1.11595	0.00191714
slr1276	slr1276	4	4	4	slr1276 hypothetical protein		1	4	4	4	23.6	23.6	23.6	30.067	275	14.761	14.6874	14.9228	14.7904	14.8072	14.7475	14.8203	14.7917	1.00088	0.987409
slr1277	slr1277	16	16	16	slr1277 pilus assembly protein homologous to general secretion pathway protein D		1	16	16	16	24.8	24.8	24.8	84.641	785	18.0552	18.1239	18.0898	18.0896	18.3186	18.3592	18.3338	18.3372	1.18721	0.0011776
slr1280	slr1280	11	11	11	slr1280 NADH dehydrogenase subunit NdhK		1	11	11	11	39.9	39.9	39.9	27.345	248	17.679	17.6953	17.6379	17.6707	17.8515	17.7483	17.9055	17.8351	1.12068	0.056533
slr1281	slr1281	4	4	4	slr1281 NADH dehydrogenase subunit I		1	4	4	4	29.1	29.1	29.1	20.593	179	15.8111	15.804	15.769	15.7947	15.8232	15.7998	15.8239	15.8156	1.01464	0.2548
slr1282	slr1282	3	3	2	slr1282 putative transposase [ISY508b: 1877114 - 1878081]		1	3	3	2	22.7	22.7	16.8	13.932	119	11.8296	11.8037	11.7569	11.7968	11.75	11.9028	12.0175	11.8901	1.06682	0.351756
slr1285	slr1285	1	1	1	slr1285 two-component sensor histidine kinase		1	1	1	1	1.9	1.9	1.9	52.622	464	12.3627	12.3815	12.2948	12.3464	12.4616	12.415	12.4079	12.4282	1.05834	0.069504
slr1287	slr1287	4	4	4	slr1287 hypothetical protein		1	4	4	4	14.3	14.3	14.3	35.927	336	14.3614	14.4115	14.4994	14.4241	14.3018	14.3615	14.3562	14.3398	0.943253	0.160113
slr1288	slr1288	1	1	1	slr1288 hypothetical protein		1	1	1	1	7.2	7.2	7.2	21.017	194	10.5374	11.004	10.756	10.7658	11.13	11.096	11.3731	11.1997	1.35092	0.0637461
slr1289	slr1289	17	17	17	slr1289 isocitrate dehydrogenase (NADP+)		1	17	17	17	40.6	40.6	40.6	52.258	475	18.392	18.3841	18.3172	18.3644	18.3492	18.3538	18.3063	18.3364	0.980764	0.384752
slr1293	slr1293	4	4	4	slr1293 similar to phytoene dehydrogenase		1	4	4	4	9.5	9.5	9.5	55.339	507	15.0422	15.0798	14.9722	15.0314	14.5253	15.1204	15.0922	14.9126	0.920953	0.603992
slr1295	slr1295	14	14	14	slr1295 iron transport system substrate-binding protein		1	14	14	14	41.7	41.7	41.7	39.37	360	18.7543	18.7785	18.7491	18.7606	18.9838	18.9381	18.9117	18.9445	1.13593	0.00577124
slr1298	slr1298	5	5	5	slr1298 unknown protein		1	5	5	5	6.9	6.9	6.9	84.275	755	15.3381	15.676	15.2901	15.4347	15.3696	15.2562	15.3208	15.3155	0.920673	0.432137
slr1299	slr1299	16	16	16	slr1299 UDP-glucose dehydrogenase		1	16	16	16	48.3	48.3	48.3	49.097	453	18.0147	18.0153	17.9464	17.9921	17.911	17.9472	17.8972	17.9185	0.950223	0.0635806
slr1300	slr1300	3	3	3	slr1300 similar to 2-octaprenyl-6-methoxyphenol hydroxylase		1	3	3	3	8	8	8	45.623	414	12.3792	12.4587	12.4017	12.4132	12.545	12.51	12.68	12.5783	1.12125	0.0680957
slr1301	slr1301	28	28	28	slr1301 hypothetical protein		1	28	28	28	57.2	57.2	57.2	61.692	535	18.5711	18.5436	18.6064	18.5737	18.703	18.6332	18.6298	18.6553	1.05821	0.0569098
slr1302	slr1302	11	11	11	slr1302 protein involved in constitutive low affinity CO2 uptake		1	11	11	11	34.8	34.8	34.8	43.441	382	17.1612	17.1524	17.1054	17.1396	17.136	17.1456	17.0785	17.12	0.986502	0.511829
slr1303	slr1303	1	1	1	slr1303 hypothetical protein		1	1	1	1	2.2	2.2	2.2	48.062	410	12.4929	12.3869	12.3293	12.4031	12.5526	12.2206	12.3282	12.3671	0.975394	0.763712
slr1305	slr1305	3	3	3	slr1305 two-component response regulator		1	3	3	3	2.7	2.7	2.7	96.226	840	14.9429	14.9591	15.0553	14.9858	14.9077	14.99	14.9277	14.9418	0.969977	0.369782
slr1306	slr1306	2	2	2	slr1306 hypothetical protein		1	2	2	2	3.9	3.9	3.9	54.27	485	12.6621	12.6657	12.7249	12.6842	12.6979	12.6892	12.7339	12.707	1.0159	0.41283
slr1307	slr1307	3	3	3	slr1307 hypothetical protein		1	3	3	3	12.8	12.8	12.8	22.896	195	14.332	14.374	14.5014	14.4025	14.3077	14.3645	14.3417	14.338	0.956294	0.333152
slr1312	slr1312	14	13	13	slr1312 arginine decarboxylase		1	14	13	13	25.3	24.1	24.1	74.476	659	17.5737	17.5841	17.5484	17.5687	17.6203	17.5758	17.5816	17.5926	1.01665	0.251067
slr1315	slr1315	3	3	3	slr1315 hypothetical protein		1	3	3	3	18.8	18.8	18.8	23.093	202	14.3173	14.3604	14.2717	14.3165	14.2307	14.3246	14.3251	14.2935	0.984197	0.601876
slr1319	slr1319	2	2	2	slr1319 iron(III) dicitrate transport system substrate-binding protein		1	2	2	2	7.9	7.9	7.9	34.867	315	14.3168	14.2978	14.3425	14.3191	14.2809	14.3792	14.4082	14.3561	1.02602	0.442498
slr1322	slr1322	17	17	17	slr1322 putative modulator of DNA gyrase; TldD		1	17	17	17	47.9	47.9	47.9	53.129	489	18.1537	18.1731	18.088	18.1383	18.1452	18.1098	18.1022	18.1191	0.986758	0.554322
slr1324	slr1324	8	8	8	slr1324 two-component hybrid sensor and regulator		1	8	8	8	22.4	22.4	22.4	46.784	420	14.0379	14.1767	14.1212	14.112	14.084	14.1776	14.1066	14.1227	1.0075	0.838643
slr1325	slr1325	15	15	15	slr1325 GTP pyrophosphokinase		1	15	15	15	20.5	20.5	20.5	86.567	760	17.1737	17.2336	17.329	17.2454	17.43	17.4364	17.4273	17.4313	1.13748	0.0539553
slr1329	slr1329	23	23	23	slr1329 ATP synthase beta subunit		1	23	23	23	68.7	68.7	68.7	51.732	483	19.3388	19.3588	19.3276	19.3417	19.4245	19.3695	19.4854	19.4265	1.06049	0.118471
slr1330	slr1330	5	5	5	slr1330 ATP synthase epsilon chain of CF(1)		1	5	5	5	45.6	45.6	45.6	14.58	136	17.7736	17.778	17.7756	17.7757	17.8132	17.8395	17.8008	17.8178	1.02961	0.0646485
slr1331	slr1331	9	9	9	slr1331 periplasmic processing protease		1	9	9	9	23.6	23.6	23.6	56.893	513	15.5666	15.6375	15.6516	15.6185	15.9551	15.9322	15.965	15.9507	1.25894	0.00274974
slr1332	slr1332	1	1	1	slr1332 beta ketoacyl-acyl carrier protein synthase		1	1	1	1	3.7	3.7	3.7	43.249	404	8.67742	8.76643	8.92453	8.78946	8.82151	8.76746	8.97635	8.85511	1.04655	0.530744
slr1334	slr1334	15	15	15	slr1334 phosphoglucomutase/phosphomannomutase		1	15	15	15	31.4	31.4	31.4	52.678	490	18.247	18.194	18.1656	18.2022	18.0505	18.0494	18.0345	18.0448	0.896657	0.0185031
slr1336	slr1336	2	2	2	slr1336 H+/Ca2+ exchanger		1	2	2	2	4.8	4.8	4.8	39.311	372	15.2958	15.3374	15.401	15.3447	15.5368	15.4723	15.4478	15.4856	1.10258	0.0261796
slr1338	slr1338	8	8	8	slr1338 hypothetical protein		1	8	8	8	40	40	40	22.438	200	17.281	17.288	17.2417	17.2702	17.3909	17.3598	17.3479	17.3662	1.06879	0.00788893
slr1339	slr1339	6	6	6	slr1339 hypothetical protein		1	6	6	6	36.2	36.2	36.2	17.329	152	16.1872	16.5247	16.0961	16.2693	16.3058	16.4958	16.2914	16.3643	1.06808	0.56226
slr1340	slr1340	4	4	4	slr1340 unknown protein		1	4	4	4	29.8	29.8	29.8	19.392	178	14.0367	14.0019	14.0323	14.0236	13.9924	13.9425	14.0705	14.0018	0.984999	0.623415
slr1342	slr1342	10	10	10	slr1342 hypothetical protein		1	10	10	10	30.3	30.3	30.3	48.519	445	16.7644	16.7269	16.8198	16.7704	16.7753	16.6828	16.7018	16.72	0.965663	0.266011
slr1343	slr1343	7	7	7	slr1343 hypothetical protein		1	7	7	7	18.1	18.1	18.1	58.141	504	15.5889	15.5689	15.6319	15.5966	15.5703	15.5268	15.5618	15.553	0.970231	0.136284
slr1347	slr1347	8	8	8	slr1347 beta-type carbonic anhydrase localized in the carboxysome		1	8	8	8	36.3	36.3	36.3	34.806	311	16.6093	16.6019	16.6287	16.6133	16.5165	16.4743	16.6357	16.5422	0.951881	0.277352
slr1348	slr1348	5	5	5	slr1348 serine acetyltransferase		1	5	5	5	24.9	24.9	24.9	27.336	249	15.1756	15.3874	14.97	15.1777	15.2378	15.4679	15.4221	15.3759	1.14734	0.244391
slr1349	slr1349	25	25	25	slr1349 glucose-6-phosphate isomerase		1	25	25	25	52.4	52.4	52.4	58.356	531	19.1871	19.1695	19.2156	19.1907	19.2316	19.2065	19.2137	19.2173	1.01859	0.178363
slr1350	slr1350	1	1	1	slr1350 acyl-lipid desaturase (delta 12)		1	1	1	1	6.8	6.8	6.8	40.495	351	11.6254	11.7757	11.9186	11.7732	12.1322	12.1835	12.0633	12.1263	1.2773	0.0380647
slr1351	slr1351	7	7	7	slr1351 UDP-N-acetylmuramoylalanyl-D-glutamyl-2 6-diaminopimelate--D-alanyl-D-alanine ligase		1	7	7	7	19.2	19.2	19.2	48.239	454	16.0827	16.0313	16.0664	16.0601	15.9978	15.984	15.9505	15.9774	0.944285	0.0162757
slr1353	slr1353	3	3	3	slr1353 hypothetical protein		1	3	3	3	14.8	14.8	14.8	31.283	291	17.2586	17.0483	17.5042	17.2704	17.327	17.1274	17.2434	17.2326	0.974162	0.811395
slr1356	slr1356	12	12	12	slr1356 30S ribosomal protein S1		1	12	12	12	37.2	37.2	37.2	36.57	328	18.5309	18.5331	18.5542	18.5394	18.4929	18.4967	18.4484	18.4793	0.959225	0.0423384
slr1362	slr1362	5	5	5	slr1362 hypothetical protein		1	5	5	5	34.6	34.6	34.6	14.794	133	15.1389	15.1662	15.1176	15.1409	15.2169	15.1691	15.167	15.1843	1.03056	0.115444
slr1363	slr1363	18	18	18	slr1363 hypothetical protein		1	18	18	18	32.6	32.6	32.6	58.901	500	17.83	17.8712	17.847	17.8494	17.7801	17.8148	17.7967	17.7972	0.96449	0.0299809
slr1364	slr1364	9	9	9	slr1364 biotin synthetase		1	9	9	9	25.7	25.7	25.7	39.349	362	15.918	15.9836	15.9916	15.9644	15.8981	15.9369	15.9923	15.9424	0.984909	0.57526
slr1367	slr1367	29	29	27	slr1367 glycogen phosphorylase		1	29	29	27	37.5	37.5	35.7	98.304	855	19.2026	19.2001	19.2199	19.2075	19.204	19.2025	19.2021	19.2029	0.996767	0.53208
slr1368	slr1368	4	4	4	slr1368 precorrin decarbocylase		1	4	4	4	16.3	16.3	16.3	24.777	227	15.9044	15.9368	16.0164	15.9525	15.8224	15.8207	15.8753	15.8394	0.924609	0.0564192
slr1369	slr1369	2	2	2	slr1369 phosphatidate cytidylyltransferase		1	2	2	2	4.8	4.8	4.8	31.875	293	12.7076	12.7201	12.812	12.7466	13.0681	12.998	13.0982	13.0548	1.23817	0.00233829
slr1376	slr1376	2	2	2	slr1376 hypothetical protein		1	2	2	2	19.1	19.1	19.1	12.879	110	14.8723	14.9643	14.9759	14.9375	15.0291	15.0834	15.0951	15.0692	1.09559	0.0355841
slr1377	slr1377	9	9	9	slr1377 leader peptidase I (signal peptidase I)		1	9	9	9	49.1	49.1	49.1	24.733	218	16.6988	16.7351	16.598	16.6773	16.4607	16.5534	16.574	16.5294	0.902531	0.0529093
slr1378	slr1378	5	5	5	slr1378 hypothetical protein		1	5	5	5	23.2	23.2	23.2	26.989	237	14.1505	14.1682	14.1548	14.1578	14.0706	14.0694	14.13	14.09	0.95408	0.0683396
slr1379	slr1379	6	6	6	slr1379 quinol oxidase subunit I		1	6	6	6	14.3	14.3	14.3	53.852	483	16.065	16.0573	16.1698	16.0974	16.0514	16.0916	16.1079	16.0836	0.990524	0.755144
slr1380	slr1380	1	1	1	slr1380 quinol oxidase subunit II		1	1	1	1	2.1	2.1	2.1	37.225	336	11.678	11.8382	11.9479	11.8214	11.836	11.7754	11.8961	11.8358	1.01006	0.877917
slr1384	slr1384	2	2	2	slr1384 hypothetical protein		1	2	2	2	5.6	5.6	5.6	42.583	391	16.4787	16.4139	16.4166	16.4364	16.5831	16.5545	16.5197	16.5524	1.08373	0.0149362
slr1385	slr1385	6	6	6	slr1385 unknown protein		1	6	6	6	19.6	19.6	19.6	35.64	322	17.256	17.1943	17.0721	17.1742	17.2295	17.1332	17.143	17.1686	0.996121	0.933466
slr1390	slr1390	18	17	17	slr1390 cell division protein FtsH		1	18	17	17	33.3	31.2	31.2	69.303	642	16.7443	16.8652	16.8573	16.8223	16.7497	16.7918	16.7388	16.7601	0.957839	0.248761
slr1391	slr1391	2	2	2	slr1391 unknown protein		1	2	2	2	15.4	15.4	15.4	16.806	156	14.1784	14.201	14.1709	14.1834	14.2772	14.2476	14.2637	14.2628	1.0566	0.00311512
slr1393	slr1393	15	15	15	slr1393 phytochrome-like protein, two-component sensor histidine kinase		1	15	15	15	20.3	20.3	20.3	109.53	974	17.148	17.1449	17.223	17.172	17.1542	17.1069	17.1391	17.1334	0.973614	0.273931
slr1395	slr1395	6	6	6	slr1395 hypothetical protein		1	6	6	6	19.6	19.6	19.6	40.525	358	15.6306	15.6325	15.6154	15.6261	15.5879	15.5814	15.496	15.5551	0.95195	0.134158
slr1396	slr1396	2	2	2	slr1396 unknown protein		1	2	2	2	11.2	11.2	11.2	24.034	205	14.1746	14.2904	13.677	14.0473	13.317	13.3792	13.1424	13.2795	0.587321	0.0416602
slr1397	slr1397	3	3	3	slr1397 unknown protein		1	3	3	3	15.9	15.9	15.9	22.967	207	15.4339	15.3985	15.5138	15.4487	15.5233	15.4635	15.5064	15.4977	1.03454	0.292053
slr1398	slr1398	5	5	5	slr1398 unknown protein		1	5	5	5	20.4	20.4	20.4	28.331	250	15.1193	15.0703	15.1629	15.1175	15.1043	15.0968	15.1231	15.108	0.993497	0.763504
slr1400	slr1400	2	2	2	slr1400 two-component hybrid sensor and regulator		1	2	2	2	5	5	5	42.043	380	15.5324	15.3141	15.8199	15.5555	15.5952	15.4766	15.5993	15.557	1.00109	0.992582
slr1403	slr1403	7	7	7	slr1403 unknown protein		1	7	7	7	2.7	2.7	2.7	311.51	3016	15.4851	15.4927	15.5049	15.4942	14.9379	14.8608	14.9592	14.9193	0.671315	0.00198977
slr1406	slr1406	2	2	2	slr1406 periplasmic protein, function unknown		1	2	2	2	22.7	22.7	22.7	18.752	181	14.0469	14.0168	14.2581	14.1073	13.9825	13.9399	13.7809	13.9011	0.866818	0.105201
slr1407	slr1407	7	7	7	slr1407 unknown protein		1	7	7	7	28.7	28.7	28.7	32.018	289	16.7483	16.6922	16.7775	16.7393	16.3093	16.2948	16.2844	16.2962	0.735506	0.00169452
slr1409	slr1409	12	12	12	slr1409 periplasmic WD-repeat protein		1	12	12	12	55.5	55.5	55.5	35.759	326	16.8737	16.8689	16.8133	16.852	16.6752	16.6825	16.6328	16.6635	0.877547	0.00194403
slr1410	slr1410	8	8	8	slr1410 periplasmic WD-repeat protein		1	8	8	8	25.4	25.4	25.4	35.989	334	16.6427	16.656	16.6197	16.6395	16.5349	16.4493	16.4639	16.4827	0.897046	0.016598
slr1411	slr1411	6	6	6	slr1411 hypothetical protein		1	6	6	6	15.2	15.2	15.2	45.731	422	14.8576	15.0075	14.7703	14.8785	14.7406	14.8682	14.7578	14.7889	0.93978	0.33957
slr1413	slr1413	3	3	3	slr1413 hypothetical protein		1	3	3	3	8.7	8.7	8.7	52.956	481	15.8659	15.8412	15.8926	15.8666	15.8011	15.8334	15.7778	15.8041	0.957628	0.0466607
slr1414	slr1414	4	4	4	slr1414 two-component sensor histidine kinase		1	4	4	4	14.8	14.8	14.8	39.38	359	14.9712	14.9991	14.8402	14.9368	14.8744	14.9266	14.8376	14.8795	0.961041	0.375834
slr1415	slr1415	4	4	4	slr1415 hypothetical protein		1	4	4	4	16	16	16	42.314	382	13.2028	13.4003	13.3044	13.3025	13.6121	13.6216	13.7238	13.6525	1.27457	0.0103551
slr1416	slr1416	5	5	5	slr1416 similar to MorR protein		1	5	5	5	18.9	18.9	18.9	33.097	297	15.0972	15.0945	15.0767	15.0895	15.0312	15.081	15.0463	15.0528	0.974904	0.115701
slr1417	slr1417	3	3	3	slr1417 hypothetical protein YCF57		1	3	3	3	32.2	32.2	32.2	12.929	118	15.5649	15.6415	15.7107	15.639	15.8788	15.8855	15.8949	15.8864	1.18703	0.0265391
slr1418	slr1418	7	7	7	slr1418 dihydroorotate dehydrogenase		1	7	7	7	21.3	21.3	21.3	41.559	381	15.4796	15.6053	15.6517	15.5789	15.7046	15.7224	15.6805	15.7025	1.08947	0.131351
slr1419	slr1419	7	7	7	slr1419 hypothetical protein		1	7	7	7	45.3	45.3	45.3	17.683	159	16.9155	16.9051	16.8514	16.8907	16.7148	16.7437	16.721	16.7265	0.892427	0.00640184
slr1420	slr1420	3	3	3	slr1420 probable sugar kinase		1	3	3	3	5.4	5.4	5.4	46.308	425	14.2271	14.0242	14.1116	14.121	12.179	12.2588	12.2106	12.2161	0.267051	0.000217162
slr1421	slr1421	1	1	1	slr1421 unknown protein		1	1	1	1	14	14	14	12.2	107	14.2574	14.3285	14.4773	14.3544	14.176	14.1077	14.2091	14.1643	0.876523	0.0813124
slr1423	slr1423	6	6	6	slr1423 UDP-N-acetylmuramate-alanine ligase		1	6	6	6	14.3	14.3	14.3	54.513	505	15.3738	15.3831	15.3799	15.379	15.559	15.4565	15.54	15.5185	1.10156	0.0463964
slr1424	slr1424	7	7	7	slr1424 UDP-N-acetylenolpyruvoylglucosamine reductase		1	7	7	7	22.4	22.4	22.4	34.586	317	15.4354	15.4454	15.4473	15.4427	15.5085	15.447	15.6129	15.5228	1.05711	0.239327
slr1425;ssr5092	slr1425	3;1	3;1	3;1	slr1425 hypothetical protein		2	3	3	3	26.5	26.5	26.5	13.083	117	14.8816	14.9083	14.7749	14.8549	14.8255	14.8084	14.7822	14.8054	0.966275	0.349044
slr1426	slr1426	4	4	4	slr1426 recombination protein RecR		1	4	4	4	18.5	18.5	18.5	25.504	232	15.4294	15.3818	15.8298	15.547	15.3413	15.4176	15.4638	15.4076	0.907877	0.43188
slr1428	slr1428	5	5	5	slr1428 hypothetical protein		1	5	5	5	14.6	14.6	14.6	70.186	624	16.4286	16.3835	16.4472	16.4198	16.3887	16.3584	16.3549	16.3673	0.964304	0.0902108
slr1429	slr1429	2	2	2	slr1429 hypothetical protein		1	2	2	2	6.9	6.9	6.9	32.818	289	13.3655	13.4064	13.4037	13.3919	13.4884	13.286	13.3345	13.3697	0.984725	0.753461
slr1431	slr1431	3	3	3	slr1431 hypothetical protein		1	3	3	3	10.5	10.5	10.5	52.88	475	12.1066	12.2871	12.0731	12.1556	12.1977	12.1755	12.1582	12.1772	1.01505	0.778003
slr1434	slr1434	3	3	3	slr1434 pyridine nucleotide transhydrogenase beta subunit		1	3	3	3	7.9	7.9	7.9	49.943	480	15.385	15.345	15.4248	15.3849	15.4104	15.3804	15.4054	15.3987	1.00962	0.621702
slr1435	slr1435	8	8	8	slr1435 PmbA protein homolog		1	8	8	8	23.9	23.9	23.9	46.378	427	15.9797	16.0044	16.0405	16.0082	15.7629	15.7763	15.8106	15.7833	0.855625	0.000718473
slr1437	slr1437	1	1	1	slr1437 unknown protein		1	1	1	1	9.8	9.8	9.8	12.671	112	15.5373	15.5593	15.5664	15.5543	15.5454	15.5067	15.5207	15.5242	0.979358	0.107503
slr1438	slr1438	9	9	9	slr1438 hypothetical protein		1	9	9	9	41.9	41.9	41.9	33.029	289	16.5668	16.5419	16.4506	16.5198	16.4933	16.4471	16.4475	16.4627	0.9612	0.243387
slr1440	slr1440	1	1	1	slr1440 hypothetical protein		1	1	1	1	6.3	6.3	6.3	16.517	143	14.8567	14.879	15.0474	14.9277	14.7653	14.7645	14.8038	14.7779	0.901346	0.124738
slr1443	slr1443	2	2	2	slr1443 serine/threonine kinase		1	2	2	2	3.1	3.1	3.1	68.699	614	14.3035	14.3658	14.2038	14.291	14.2974	14.3039	14.2842	14.2952	1.00285	0.938746
slr1444	slr1444	6	6	6	slr1444 hypothetical protein		1	6	6	6	20.1	20.1	20.1	38.669	333	15.2932	15.3449	15.3642	15.3341	15.2313	15.1985	15.2544	15.2281	0.929148	0.0187515
slr1448	slr1448	5	5	5	slr1448 fructokinase		1	5	5	5	25.1	25.1	25.1	33.09	307	14.5996	14.6977	14.583	14.6268	14.5105	14.6737	14.5558	14.58	0.968099	0.485374
slr1449	slr1449	2	2	2	slr1449 hypothetical protein		1	2	2	2	8.1	8.1	8.1	23.731	197	13.6044	13.5561	13.7285	13.6297	13.6878	13.6648	13.6903	13.6809	1.03617	0.423663
slr1450	slr1450	1	1	1	slr1450 unknown protein		1	1	1	1	12.5	12.5	12.5	11.258	104	10.8867	11.1226	10.6585	10.8893	10.5512	10.6162	10.503	10.5568	0.79418	0.124036
slr1452	slr1452	10	10	10	slr1452 sulfate transport system substrate-binding protein		1	10	10	10	30.4	30.4	30.4	38.042	352	17.6137	17.4939	17.5998	17.5691	17.5898	17.5228	17.5467	17.5531	0.988962	0.732084
slr1453	slr1453	1	1	1	slr1453 sulfate transport system permease protein		1	1	1	1	3.8	3.8	3.8	31.351	286	12.1706	12.332	12.2008	12.2345	12.1549	12.2224	12.1795	12.1856	0.966705	0.435749
slr1454	slr1454	2	2	2	slr1454 sulfate transport system permease protein		1	2	2	2	11.2	11.2	11.2	30.364	276	12.6834	12.7735	12.7768	12.7446	12.6676	12.8237	12.5836	12.6916	0.963977	0.544267
slr1455	slr1455	3	3	3	slr1455 sulfate transport system ATP-binding protein		1	3	3	3	7.9	7.9	7.9	39.194	355	13.4874	13.5667	13.418	13.4907	13.3804	13.3401	13.3037	13.3414	0.901702	0.0539578
slr1459	slr1459	12	11	11	slr1459 phycobilisome core component		1	12	11	11	79.9	75.7	75.7	18.892	169	19.5007	19.4974	19.5281	19.5087	19.5183	19.4981	19.4551	19.4905	0.987424	0.448876
slr1461	slr1461	1	1	1	slr1461 hypothetical protein		1	1	1	1	5.6	5.6	5.6	21.865	198	15.1147	14.8964	14.8666	14.9592	15.2133	14.9989	15.0091	15.0738	1.08262	0.336902
slr1462	slr1462	6	6	6	slr1462 hypothetical protein		1	6	6	6	12.8	12.8	12.8	62.672	561	15.433	15.438	15.4416	15.4375	15.5734	15.5462	15.4873	15.5356	1.07038	0.0596652
slr1463	slr1463	36	36	36	slr1463 elongation factor EF-G		1	36	36	36	74	74	74	76.749	695	19.7147	19.7207	19.6589	19.6981	19.6624	19.6575	19.641	19.6537	0.96968	0.14216
slr1464	slr1464	3	3	3	slr1464 hypothetical protein		1	3	3	3	11.7	11.7	11.7	29.299	265	13.2991	13.5182	13.0326	13.2833	13.3074	13.2596	13.1656	13.2442	0.973261	0.811127
slr1467	slr1467	2	2	2	slr1467 precorrin isomerase		1	2	2	2	9.9	9.9	9.9	24.62	222	14.2444	14.2728	14.2938	14.2703	14.2337	14.1975	14.2459	14.2257	0.969551	0.0941127
slr1468	slr1468	2	2	2	slr1468 hypothetical protein		1	2	2	2	15.4	15.4	15.4	16.75	149	15.2392	15.3119	15.208	15.253	15.0964	15.1698	15.1629	15.143	0.926579	0.0505688
slr1470	slr1470	5	5	5	slr1470 hypothetical protein		1	5	5	5	24.4	24.4	24.4	14.902	131	17.1517	17.2011	17.2186	17.1905	17.2832	17.2786	17.2757	17.2792	1.06344	0.04591
slr1471	slr1471	9	9	9	slr1471 hypothetical protein		1	9	9	9	20.3	20.3	20.3	42.626	384	18.3891	18.3709	18.437	18.399	18.4275	18.4105	18.4395	18.4259	1.01879	0.307061
slr1472	slr1472	2	2	2	slr1472 hypothetical protein		1	2	2	2	14	14	14	18.701	164	12.5421	12.5437	12.3555	12.4805	12.4237	12.38	12.3645	12.3894	0.93883	0.279572
slr1474	slr1474	1	1	1	slr1474 hypothetical protein		1	1	1	1	4.1	4.1	4.1	30.437	269	11.1494	11.2645	11.3892	11.2677	11.5398	11.5767	11.6141	11.5769	1.23901	0.0370081
slr1476	slr1476	5	5	5	slr1476 aspartate carbamoyltransferase		1	5	5	5	15.7	15.7	15.7	36.393	331	15.8217	15.8154	15.9486	15.8619	15.9194	15.8837	15.8815	15.8949	1.0231	0.531776
slr1478	slr1478	2	2	2	slr1478 hypothetical protein		1	2	2	2	5.4	5.4	5.4	35.411	317	13.1807	13.1861	13.1842	13.1837	13.2232	13.1316	13.1471	13.1673	0.988722	0.621863
slr1485	slr1485	5	5	5	slr1485 putative phosphatidylinositol phosphate kinase, salt-induced periplasmic protein		1	5	5	5	15.8	15.8	15.8	37.586	349	13.5007	13.5994	13.6304	13.5768	14.0926	14.0143	14.0591	14.0553	1.39325	0.00133232
slr1492	slr1492	3	3	3	slr1492 iron(III) dicitrate transport system substrate-binding protein		1	3	3	3	17	17	17	34.027	311	12.9	12.958	12.797	12.885	12.8176	12.7096	12.9906	12.8393	0.968779	0.659211
slr1493	slr1493	1	1	1	slr1493 hypothetical protein		1	1	1	1	5.6	5.6	5.6	13.585	124	9.76443	9.47047	9.71777	9.65089	9.21212	9.07472	9.19832	9.16172	0.712435	0.0186248
slr1495	slr1495	4	4	4	slr1495 hypothetical protein		1	4	4	4	7.1	7.1	7.1	62.002	549	13.9467	14.0182	14.0372	14.0007	13.9136	14.0374	14.0264	13.9925	0.994308	0.873602
slr1498	slr1498	4	4	4	slr1498 putative hydrogenase expression/formation protein HypD		1	4	4	4	11.5	11.5	11.5	40.633	374	12.6372	12.606	12.7592	12.6675	12.8266	12.7025	12.6114	12.7135	1.03246	0.58854
slr1501	slr1501	5	5	5	slr1501 probable acetyltransferase		1	5	5	5	23.6	23.6	23.6	24.988	225	16.7524	16.7815	16.699	16.7443	16.8762	16.8726	16.7488	16.8326	1.06308	0.159636
slr1503	slr1503	3	3	3	slr1503 hypothetical protein		1	3	3	3	14.8	14.8	14.8	36.512	330	13.0198	13.1501	12.9886	13.0528	13.0875	13.1674	13.0132	13.0894	1.02564	0.612537
slr1505	slr1505	10	10	10	slr1505 unknown protein		1	10	10	10	49.5	49.5	49.5	22.551	198	16.5681	16.5025	16.4559	16.5089	16.6656	16.5969	16.5647	16.609	1.07191	0.0860953
slr1506	slr1506	17	17	17	slr1506 hypothetical protein		1	17	17	17	30	30	30	63.773	577	18.4376	18.4039	18.374	18.4051	18.5433	18.4929	18.4993	18.5118	1.07675	0.0122908
slr1507	slr1507	8	8	8	slr1507 hypothetical protein		1	8	8	8	28.1	28.1	28.1	38.063	338	16.1793	16.2598	16.0541	16.1644	16.2372	16.3706	16.333	16.3136	1.10896	0.11676
slr1508	slr1508	6	6	6	slr1508 probable glycosyltransferase		1	6	6	6	15.2	15.2	15.2	43.275	389	16.0008	15.9568	16.0678	16.0085	15.9898	15.9848	15.9749	15.9832	0.982622	0.515946
slr1509	slr1509	1	1	1	slr1509 membrane subunit of a Ktr-like ion transport system		1	1	1	1	2.3	2.3	2.3	48.286	444	11.5637	11.6788	11.725	11.6558	11.754	11.6352	11.7565	11.7152	1.04206	0.396801
slr1510	slr1510	9	9	9	slr1510 fatty acid/phospholipid synthesis protein PlsX		1	9	9	9	33.3	33.3	33.3	37.285	348	17.1455	17.161	17.154	17.1535	17.2838	17.2435	17.222	17.2498	1.06899	0.0278814
slr1511	slr1511	8	8	8	slr1511 3-oxoacyl-[acyl-carrier-protein] synthase III		1	8	8	8	26.7	26.7	26.7	35.166	330	18.1129	18.0365	18.0568	18.0688	18.2767	18.2121	18.202	18.2303	1.11844	0.00784154
slr1512	slr1512	3	3	3	slr1512 sodium-dependent bicarbonate transporter		1	3	3	3	11	11	11	39.647	374	15.705	15.9019	15.9372	15.848	16.0442	16.2076	16.2375	16.1631	1.24406	0.0299289
slr1513	slr1513	5	5	5	slr1513 periplasmic protein, function unknown		1	5	5	5	43.6	43.6	43.6	12.007	110	18.002	18.1639	18.3021	18.156	18.1698	18.2255	18.2448	18.2134	1.04061	0.580283
[truncated: 631 more rows]

## Sheet: Table S4B
Table S4B. List of all quantified proteins.
Protein IDs	Majority protein IDs	Peptide counts (all)	Peptide counts (razor+unique)	Peptide counts (unique)	Description of majority protein		Number of proteins	Peptides	Razor + unique peptides	Unique peptides	Sequence coverage [%]	Unique + razor sequence coverage [%]	Unique sequence coverage [%]	Mol. weight [kDa]	Sequence length	Log_WT-1	Log_WT-2	Log_WT-3	Average_WT	Log_ClpX-1	Log_ClpX-2	Log_ClpX-3	Average_ClpX	Ratio(ClpX/WT)	p value
sll0002	sll0002	15	15	15	sll0002 penicillin-binding protein		1	15	15	15	20.3	20.3	20.3	92.611	860	17.5872	17.5843	17.6285	17.6	17.9829	17.8019	17.9108	17.8985	1.22988	0.0233249
sll0005	sll0005	15	15	15	sll0005 hypothetical protein		1	15	15	15	23.3	23.3	23.3	77.347	681	16.7544	16.8472	16.901	16.8342	17.2524	17.2847	17.2942	17.2771	1.35933	0.00573425
sll0006	sll0006	14	14	14	sll0006 putative aminotransferase		1	14	14	14	39.8	39.8	39.8	43.979	394	17.6736	17.6473	17.5837	17.6349	17.6477	17.6514	17.6042	17.6344	0.999688	0.989183
sll0007	sll0007	3	3	3	sll0007 hypothetical protein		1	3	3	3	20.4	20.4	20.4	21.249	191	14.8218	14.8693	14.9492	14.8801	14.6252	14.7519	14.6631	14.6801	0.870539	0.019333
sll0008	sll0008	5	5	5	sll0008 unknown protein		1	5	5	5	36.1	36.1	36.1	19.022	169	16.133	16.1856	16.2752	16.1979	16.1909	16.2008	16.1408	16.1775	0.985938	0.686058
sll0016	sll0016	7	7	7	sll0016 probable membrane-bound lytic transglycosylase A		1	7	7	7	23.2	23.2	23.2	42.115	383	18.0082	17.9389	18.3675	18.1049	18.2054	18.185	18.2382	18.2095	1.07522	0.513994
sll0017	sll0017	14	14	14	sll0017 glutamate-1-semialdehyde aminomutase		1	14	14	14	47.6	47.6	47.6	45.891	433	18.8408	18.8111	18.7729	18.8083	18.8691	18.7864	18.8694	18.8417	1.02341	0.385985
sll0018	sll0018	14	14	14	sll0018 fructose-bisphosphate aldolase, class II		1	14	14	14	48.2	48.2	48.2	38.972	359	20.0876	20.0983	20.0445	20.0768	20.1627	20.1299	20.1414	20.1447	1.04816	0.0336182
sll0019	sll0019	9	9	9	sll0019 1-deoxy-d-xylulose 5-phosphate reductoisomerase		1	9	9	9	32	32	32	42.532	394	16.473	16.5048	16.5559	16.5112	16.5603	16.5694	16.5889	16.5729	1.04367	0.112917
sll0020	sll0020	40	40	37	sll0020 ATP-dependent Clp protease ATPase subunit		1	40	40	37	53.6	53.6	49.8	91.173	821	19.9078	19.914	19.9339	19.9186	19.8724	19.8777	19.8623	19.8708	0.967455	0.0114989
sll0021	sll0021	6	6	6	sll0021 probable exonuclease		1	6	6	6	15.6	15.6	15.6	45.939	416	15.8645	15.8305	15.8599	15.8516	15.9315	15.9557	15.9746	15.9539	1.07347	0.00363505
sll0022	sll0022	7	7	7	sll0022 unknown protein		1	7	7	7	33.7	33.7	33.7	26.643	249	15.5307	15.5151	15.4119	15.4859	15.4139	15.5493	15.489	15.4841	0.998749	0.974964
sll0023	sll0023	7	7	7	sll0023 hypothetical protein		1	7	7	7	22.1	22.1	22.1	51.653	447	15.9651	15.9314	15.8725	15.923	15.8681	15.8588	15.7759	15.8343	0.940373	0.0906258
sll0024	sll0024	2	2	2	sll0024 unknown protein		1	2	2	2	7.7	7.7	7.7	32.318	273	13.7001	13.7118	13.8198	13.7439	13.8025	13.6796	13.6909	13.7243	0.986513	0.738308
sll0026	sll0026	1	1	1	sll0026 NADH dehydrogenase subunit 5 (involved in constitutive, low affinity CO2 uptake)		1	1	1	1	1.1	1.1	1.1	69.363	634	11.9526	11.9377	11.795	11.8951	11.8942	11.9219	12.0052	11.9405	1.03195	0.499507
sll0027	sll0027	4	4	4	sll0027 NADH dehydrogenase subunit 4 (involved in constitutive, low affinity CO2 uptake)		1	4	4	4	7.9	7.9	7.9	55.159	507	15.1104	15.0925	15.2235	15.1421	15.1084	14.9784	15.0107	15.0325	0.926812	0.125162
sll0030	sll0030	1	1	1	sll0030 cmp operon transcriptional regulator, LysR family protein		1	1	1	1	4.9	4.9	4.9	34.099	304	11.8892	12.0832	12.2568	12.0764	12.0296	12.0903	12.2239	12.1146	1.02687	0.771537
sll0031	sll0031	1	1	1	sll0031 hypothetical protein		1	1	1	1	1.8	1.8	1.8	43.41	395	14.8407	14.7987	14.8213	14.8202	15.1124	15.1657	15.1125	15.1302	1.23967	0.000288597
sll0033	sll0033	10	10	10	sll0033 carotene isomerase		1	10	10	10	24	24	24	55.771	501	17.0004	17.0709	16.8935	16.9883	16.9007	17.0192	16.983	16.9676	0.985768	0.758989
sll0034	sll0034	4	4	4	sll0034 putative carboxypeptidase		1	4	4	4	16.7	16.7	16.7	28.593	258	14.1318	14.2216	14.1271	14.1602	14.3262	14.2053	14.2754	14.269	1.07833	0.0810553
sll0036	sll0036	9	9	9	sll0036 hypothetical protein		1	9	9	9	24	24	24	45.909	433	15.9084	15.8989	16.0611	15.9561	15.9071	15.8448	15.8617	15.8712	0.94284	0.242714
sll0037	sll0037	6	6	6	sll0037 hypothetical protein		1	6	6	6	23.2	23.2	23.2	38.339	336	15.6348	15.6352	15.7224	15.6641	15.5371	15.5307	15.5998	15.5559	0.927684	0.0452443
sll0038	sll0038	16	16	16	sll0038 positive phototaxis protein, two-component response regulator PatA subfamily		1	16	16	16	40.5	40.5	40.5	44.815	402	17.8531	17.8719	17.8657	17.8636	17.8808	17.8963	17.9252	17.9008	1.02614	0.0872945
sll0039	sll0039	7	7	7	sll0039 positive phototaxis protein, two-component response regulator CheY subfamily		1	7	7	7	42.9	42.9	42.9	13.181	119	15.8674	15.9726	15.9003	15.9135	15.8886	15.8612	15.8784	15.876	0.974392	0.351583
sll0040	sll0040	2	2	2	sll0040 positive phototaxis protein, homologous to chemotaxis protein CheW		1	2	2	2	26.5	26.5	26.5	16.214	147	15.3044	15.34	15.3339	15.3261	15.237	15.1725	15.1388	15.1827	0.905423	0.0261786
sll0041	sll0041	33	33	33	sll0041 phytochrome-like photoreceptor protein for positive phototaxis; homologous to methyl-accepting chemotaxis protein		1	33	33	33	40	40	40	108.33	1000	18.5067	18.5734	18.6024	18.5609	18.5174	18.5561	18.5342	18.5359	0.982856	0.481046
sll0042	sll0042	8	8	8	sll0042 methyl-accepting chemotaxis protein for positive phototaxis		1	8	8	8	63.8	63.8	63.8	17.707	163	16.1405	16.1457	16.1493	16.1452	16.1358	16.0923	16.0829	16.1037	0.971628	0.122441
sll0043	sll0043	25	24	24	sll0043 positive phototaxis protein, homologous to chemotaxis protein CheA, two-component hybrid histidine kinase		1	25	24	24	19.3	18.7	18.7	153.1	1402	17.6864	17.7422	17.8031	17.7439	17.6781	17.7791	17.7751	17.7441	1.00013	0.996937
sll0044	sll0044	1	1	1	sll0044 unknown protein		1	1	1	1	5.6	5.6	5.6	17.733	161	13.7614	13.7069	13.5427	13.6704	13.6953	13.5985	13.4511	13.5816	0.940365	0.411386
sll0045	sll0045	4	4	4	sll0045 sucrose phosphate synthase		1	4	4	4	4.9	4.9	4.9	81.411	720	15.204	15.1285	15.0777	15.1367	15.0534	15.1307	15.1409	15.1083	0.980486	0.571839
sll0048	sll0048	13	13	13	sll0048 unknown protein		1	13	13	13	41.3	41.3	41.3	34.866	312	17.4671	17.56	17.6029	17.5433	17.5044	17.5317	17.5085	17.5149	0.980475	0.554288
sll0051	sll0051	7	7	7	sll0051 hypothetical protein		1	7	7	7	43.4	43.4	43.4	17.799	159	17.2456	17.2237	17.2306	17.2333	17.3816	17.3045	17.3364	17.3409	1.07742	0.032383
sll0053	sll0053	14	14	14	sll0053 biotin carboxylase		1	14	14	14	44.2	44.2	44.2	49.164	448	17.4094	17.3487	17.4337	17.3972	17.2869	17.314	17.2546	17.2851	0.925242	0.0267053
sll0055	sll0055	3	3	3	sll0055 processing protease		1	3	3	3	7	7	7	48.117	428	13.4016	13.5101	13.5671	13.4929	13.3931	13.3696	13.4841	13.4156	0.947815	0.272112
sll0057	sll0057	13	13	13	sll0057 heat shock protein GrpE		1	13	13	13	57.4	57.4	57.4	27.567	249	18.8097	18.8571	18.7373	18.8014	18.7786	18.9086	18.911	18.8661	1.04587	0.314565
sll0058	sll0058	21	21	21	sll0058 DnaK protein 1, heat shock protein 70, molecular chaperone		1	21	21	21	31.4	31.4	31.4	75.178	692	17.634	17.6518	17.6654	17.6504	17.7351	17.7102	17.7399	17.7284	1.05553	0.00381146
sll0063	sll0063	3	3	3	sll0063 hypothetical protein		1	3	3	3	7.3	7.3	7.3	43.113	395	14.2523	14.2254	14.2806	14.2528	14.1693	14.21	14.1957	14.1917	0.958538	0.0414314
sll0064	sll0064	3	3	3	sll0064 periplasmic protein, putative polar amino acid transport system substrate-binding protein		1	3	3	3	8	8	8	30.177	275	15.7459	15.696	15.8545	15.7654	16.0044	16.0148	16.0243	16.0145	1.18843	0.0319282
sll0065	sll0065	9	9	9	sll0065 acetolactate synthase small subunit		1	9	9	9	65.7	65.7	65.7	18.871	172	17.4152	17.3386	17.4688	17.4075	17.4234	17.4271	17.4295	17.4266	1.01333	0.663417
sll0066	sll0066	7	7	7	sll0066 unknown protein		1	7	7	7	27.6	27.6	27.6	34.168	315	15.7867	15.8099	15.7355	15.7774	15.6166	15.6922	15.6668	15.6585	0.920928	0.0190891
sll0067	sll0067	3	3	3	sll0067 glutathione S-transferase		1	3	3	3	14.1	14.1	14.1	20.377	184	16.3108	16.2905	16.3754	16.3256	16.1568	16.2296	16.203	16.1965	0.914392	0.0189624
sll0068	sll0068	18	18	18	sll0068 unknown protein		1	18	18	18	16	16	16	134.66	1209	17.837	17.7866	17.6193	17.7476	17.7362	17.7429	17.7294	17.7362	0.992095	0.877976
sll0069	sll0069	9	9	9	sll0069 hypothetical protein		1	9	9	9	41	41	41	28.901	256	16.959	16.9233	16.9511	16.9445	16.9684	16.9333	16.9979	16.9665	1.01541	0.377182
sll0070	sll0070	5	5	5	sll0070 phosphoribosylglycinamide formyltransferase		1	5	5	5	26.1	26.1	26.1	32.634	284	15.3217	15.3599	15.3409	15.3408	15.3493	15.2984	15.1094	15.2524	0.940523	0.348778
sll0071	sll0071	3	3	3	sll0071 hypothetical protein		1	3	3	3	9	9	9	38	333	13.2387	13.169	12.8423	13.0833	13.511	13.0512	13.386	13.3161	1.17505	0.274962
sll0072	sll0072	5	5	5	sll0072 hypothetical protein		1	5	5	5	30.4	30.4	30.4	25.799	227	14.6614	14.7904	14.6145	14.6888	14.5459	14.7301	14.6388	14.6383	0.965586	0.536473
sll0078	sll0078	19	19	19	sll0078 threonyl-tRNA synthetase		1	19	19	19	32.7	32.7	32.7	68.872	603	18.1122	18.0688	18.0685	18.0832	18.1388	18.1415	18.1569	18.1457	1.04432	0.0361191
sll0080	sll0080	7	7	7	sll0080 N-acetyl-gamma-glutamyl-phosphate reductase		1	7	7	7	24.8	24.8	24.8	38.209	351	16.359	16.3256	16.3291	16.3379	16.3529	16.3908	16.3429	16.3622	1.01695	0.256306
sll0082	sll0082	1	1	1	sll0082 hypothetical protein		1	1	1	1	11.9	11.9	11.9	13.848	118	11.6516	11.5724	11.7706	11.6649	11.3792	11.7183	11.7518	11.6165	0.966995	0.739394
sll0083	sll0083	3	3	3	sll0083 phosphoheptose isomerase		1	3	3	3	25.8	25.8	25.8	21.137	194	11.6915	11.6863	11.504	11.6273	11.4436	11.616	11.3747	11.4781	0.90176	0.19158
sll0085	sll0085	3	3	3	sll0085 unknown protein		1	3	3	3	9.9	9.9	9.9	46.427	403	12.9541	13.0132	12.6878	12.8851	12.6279	12.8688	12.8635	12.7867	0.934112	0.486541
sll0086	sll0086	12	12	12	sll0086 putative arsenical pump-driving ATPase		1	12	12	12	33.1	33.1	33.1	44.626	396	17.5409	17.5357	17.5671	17.5479	17.7749	17.6952	17.6884	17.7195	1.12632	0.0166364
sll0088	sll0088	2	2	2	sll0088 hypothetical protein		1	2	2	2	12.9	12.9	12.9	27.37	240	13.9388	13.9784	14.0231	13.9801	13.8651	13.8849	13.9257	13.8919	0.940712	0.0480984
sll0094	sll0094	8	8	8	sll0094 two-component sensor histidine kinase		1	8	8	8	17.3	17.3	17.3	51.781	457	17.0141	17.0735	17.084	17.0572	16.8443	16.9644	16.9384	16.9157	0.906573	0.0393851
sll0095	sll0095	2	2	2	sll0095 hypothetical protein		1	2	2	2	3.2	3.2	3.2	60.723	531	15.981	15.9757	15.9457	15.9675	15.8956	15.8838	15.849	15.8761	0.938643	0.00788514
sll0096	sll0096	10	10	10	sll0096 hypothetical protein		1	10	10	10	24.6	24.6	24.6	49.777	448	16.3213	16.3675	16.4402	16.3763	16.6204	16.6161	16.6116	16.616	1.18074	0.0197747
sll0098	sll0098	5	5	5	sll0098 hypothetical protein		1	5	5	5	16.9	16.9	16.9	38.856	350	15.1116	15.193	15.0849	15.1299	15.1651	15.1743	15.1025	15.1473	1.01216	0.68482
sll0099	sll0099	3	3	3	sll0099 precorrin-6y C5, 15-methyltransferase (decarboxylating)		1	3	3	3	5.9	5.9	5.9	46.276	425	12.7267	12.688	12.6143	12.6763	12.8446	12.7902	12.6806	12.7718	1.0684	0.186768
sll0100	sll0100	3	3	3	sll0100 N-acyl-L-amino acid amidohydrolase		1	3	3	3	8.4	8.4	8.4	42.656	393	13.6439	13.7941	13.691	13.7097	13.7227	13.8488	13.8989	13.8234	1.08204	0.174899
sll0102	sll0102	11	11	11	sll0102 hypothetical protein		1	11	11	11	33.5	33.5	33.5	40.096	358	16.7019	16.6756	16.6425	16.6733	16.5957	16.6561	16.6446	16.6321	0.971854	0.178378
sll0103	sll0103	13	13	13	sll0103 hypothetical protein		1	13	13	13	31.7	31.7	31.7	45.849	420	17.6444	17.6486	17.7224	17.6718	17.6762	17.702	17.7156	17.6979	1.01828	0.421751
sll0108	sll0108	3	3	3	sll0108 ammonium/methylammonium permease		1	3	3	3	9.7	9.7	9.7	53.58	507	17.0608	16.9947	16.8875	16.981	17.111	16.9765	17.0596	17.0491	1.04831	0.350341
sll0109	sll0109	2	2	2	sll0109 chorismate mutase		1	2	2	2	22.8	22.8	22.8	14.401	127	13.8358	13.783	13.8071	13.8086	13.7264	13.8077	13.8971	13.8104	1.00124	0.975152
sll0135	sll0135	7	7	7	sll0135 putative 5-methylthioadenosine phosphorylase		1	7	7	7	30.8	30.8	30.8	34.483	318	15.978	15.9855	16.0234	15.9956	15.8833	15.958	16.0338	15.9584	0.974511	0.487235
sll0136	sll0136	13	13	13	sll0136 aminopeptidase P		1	13	13	13	39.7	39.7	39.7	49.5	441	17.2516	17.2894	17.32	17.287	17.2483	17.2308	17.215	17.2314	0.962185	0.0885303
sll0141	sll0141	6	6	6	sll0141 hypothetical protein		1	6	6	6	13.7	13.7	13.7	50.992	467	14.3931	14.4271	14.3493	14.3899	14.827	14.8083	14.7944	14.8099	1.33795	0.000802427
sll0142	sll0142	7	7	7	sll0142 probable cation efflux system protein		1	7	7	7	6	6	6	115.19	1075	16.7045	16.7361	16.7762	16.7389	16.8471	16.9206	16.9299	16.8992	1.11748	0.00983957
sll0144	sll0144	8	8	8	sll0144 uridine monophosphate kinase		1	8	8	8	33.5	33.5	33.5	27.651	260	17.9192	17.8445	18.0412	17.935	17.8404	17.832	17.8675	17.8466	0.940577	0.261089
sll0145	sll0145	11	11	11	sll0145 ribosome releasing factor		1	11	11	11	51.1	51.1	51.1	20.186	182	17.7179	17.6773	17.6635	17.6862	17.6861	17.6335	17.68	17.6666	0.986474	0.446243
sll0147	sll0147	12	12	12	sll0147 hypothetical protein		1	12	12	12	20.7	20.7	20.7	76.269	668	17.1071	17.0953	17.1163	17.1062	17.0203	16.9821	17.0171	17.0065	0.933214	0.00573442
sll0148	sll0148	15	15	15	sll0148 hypothetical protein		1	15	15	15	28.7	28.7	28.7	78.5	735	17.3149	17.3708	17.5831	17.4229	17.5026	17.5765	17.6708	17.5833	1.11759	0.182953
sll0149	sll0149	12	12	12	sll0149 hypothetical protein		1	12	12	12	23.6	23.6	23.6	65.813	584	16.8487	16.8957	16.7033	16.8159	16.7103	16.7658	16.7081	16.7281	0.940935	0.265255
sll0154	sll0154	7	7	7	sll0154 hypothetical protein		1	7	7	7	16	16	16	51.007	462	16.5746	16.6604	16.7544	16.6631	16.7251	16.7883	16.7989	16.7708	1.07746	0.16235
sll0157	sll0157	3	3	3	sll0157 hypothetical protein		1	3	3	3	23.4	23.4	23.4	28.098	256	14.6745	14.7016	14.5778	14.6513	14.7145	14.6063	14.5334	14.618	0.977206	0.636722
sll0158	sll0158	24	24	24	sll0158 1,4-alpha-glucan branching enzyme		1	24	24	24	40.3	40.3	40.3	89.526	770	18.5729	18.5353	18.6302	18.5795	18.5707	18.5811	18.5768	18.5762	0.997714	0.915893
sll0160	sll0160	1	1	1	sll0160 hypothetical protein		1	1	1	1	3.6	3.6	3.6	25.73	224	11.3244	11.3849	11.6044	11.4379	11.4918	11.2419	11.4466	11.3934	0.969668	0.71827
sll0162	sll0162	9	9	9	sll0162 hypothetical protein		1	9	9	9	55.7	55.7	55.7	22.688	194	16.0593	16.1335	16.0913	16.0947	16.1279	16.0933	16.2319	16.151	1.0398	0.315873
sll0163	sll0163	30	30	30	sll0163 WD-repeat protein		1	30	30	30	18.9	18.9	18.9	189.93	1693	18.5803	18.5591	18.5877	18.5757	18.5826	18.55	18.5246	18.5524	0.983978	0.305189
sll0166	sll0166	10	10	10	sll0166 a fusion protein between uroporphyrinogen-III C-methyltransferase (CobA/CorA) and uroporphyrinogen-III synthase (HemD)		1	10	10	10	21.2	21.2	21.2	58.689	538	16.3874	16.3466	16.4881	16.4074	16.4853	16.5205	16.5293	16.5117	1.07501	0.120384
sll0167	sll0167	1	1	1	sll0167 unknown protein		1	1	1	1	10.4	10.4	10.4	17.865	164	14.1793	14.1447	14.3069	14.2103	13.9758	14.0529	14.0226	14.0171	0.874666	0.0421856
sll0168	sll0168	1	1	1	sll0168 hypothetical protein		1	1	1	1	15.3	15.3	15.3	12.373	111	9.15222	8.77991	9.04761	8.99325	8.95975	8.01612	8.45224	8.47604	0.698722	0.189351
sll0169	sll0169	13	13	13	sll0169 cell division protein Ftn2 homolog		1	13	13	13	21.6	21.6	21.6	79.423	714	17.6902	17.7085	17.7545	17.7177	17.7039	17.7425	17.7345	17.7269	1.00642	0.706172
sll0170	sll0170	34	34	33	sll0170 DnaK protein 2, heat shock protein 70, molecular chaperone		1	34	34	33	56	56	54.9	67.613	636	19.7944	19.8266	19.8188	19.8132	19.8608	19.8509	19.8464	19.8527	1.02772	0.0391305
sll0171	sll0171	7	7	7	sll0171 probable aminomethyltransferase		1	7	7	7	18.8	18.8	18.8	41.036	372	16.7533	16.7463	16.8024	16.7673	16.783	16.8161	16.8317	16.8102	1.03019	0.135473
sll0172	sll0172	3	3	3	sll0172 periplasmic protein, function unknown		1	3	3	3	25	25	25	16.347	152	14.7676	14.7235	14.831	14.7741	14.6833	14.6663	14.6579	14.6692	0.929881	0.0710042
sll0173	sll0173	7	7	7	sll0173 virginiamycin B hydrolase, periplasmic protein		1	7	7	7	29.8	29.8	29.8	38.545	352	16.9542	16.9133	16.9473	16.9383	16.9277	16.8668	16.9075	16.9007	0.974297	0.16963
sll0174	sll0174	1	1	1	sll0174 hypothetical protein		1	1	1	1	2.8	2.8	2.8	30.551	284	13.8936	13.9675	13.9327	13.9313	13.8539	13.7755	13.8115	13.8136	0.921674	0.019523
sll0175	sll0175	9	9	9	sll0175 hypothetical protein		1	9	9	9	15.4	15.4	15.4	59.249	540	17.7553	17.5995	18.1162	17.8237	17.8022	17.7607	17.8368	17.7999	0.983663	0.89144
sll0176	sll0176	5	5	5	sll0176 hypothetical protein		1	5	5	5	55.1	55.1	55.1	12.02	107	15.31	15.3668	15.241	15.3059	15.0824	15.2407	15.1928	15.172	0.911307	0.0909755
sll0178	sll0178	9	9	9	sll0178 hypothetical protein		1	9	9	9	6.8	6.8	6.8	151.89	1319	14.8353	14.8572	14.8811	14.8578	15.0543	15.0809	15.0273	15.0542	1.14577	0.000727073
sll0179	sll0179	10	10	10	sll0179 glutamyl-tRNA synthetase		1	10	10	10	22.2	22.2	22.2	54.008	483	16.6474	16.7333	16.6629	16.6812	16.6649	16.7395	16.746	16.7168	1.02498	0.391655
sll0180	sll0180	17	17	17	sll0180 hypothetical protein		1	17	17	17	43.9	43.9	43.9	53.966	501	17.7654	17.7917	17.7793	17.7788	17.6179	17.6711	17.7274	17.6721	0.928753	0.0705289
sll0182	sll0182	8	8	8	sll0182 ABC transporter ATP-binding protein		1	8	8	8	16.6	16.6	16.6	74.272	661	17.8124	17.7797	17.8157	17.8026	17.7266	17.6854	17.6257	17.6792	0.91806	0.038176
sll0183	sll0183	2	2	2	sll0183 hypothetical protein		1	2	2	2	9.7	9.7	9.7	27.402	259	13.5914	13.3393	14.0765	13.669	13.9347	13.8364	13.9173	13.8961	1.17046	0.404217
sll0184	sll0184	7	7	7	sll0184 group2 RNA polymerase sigma factor SigC		1	7	7	7	17.1	17.1	17.1	46.581	404	16.105	16.0544	16.0993	16.0862	16.0899	15.9312	16.0216	16.0142	0.951328	0.253622
sll0185	sll0185	14	14	14	sll0185 hypothetical protein		1	14	14	14	32.7	32.7	32.7	46.993	419	17.5206	17.4649	17.5048	17.4968	17.47	17.3607	17.3638	17.3982	0.933948	0.0940114
sll0188	sll0188	7	7	7	sll0188 unknown protein		1	7	7	7	20.2	20.2	20.2	52.391	501	15.9844	16.0366	16.0806	16.0339	16.1183	16.1443	16.0659	16.1095	1.05382	0.106858
sll0189	sll0189	1	1	1	sll0189 hypothetical protein		1	1	1	1	10.7	10.7	10.7	16.96	150	11.1877	11.4016	11.2127	11.2674	11.4839	11.2521	11.3759	11.3706	1.0742	0.338631
sll0191	sll0191	5	5	5	sll0191 unknown protein		1	5	5	5	16.9	16.9	16.9	28.923	249	16.4121	16.3666	16.4196	16.3994	16.3031	16.2831	16.2381	16.2748	0.917217	0.0084152
sll0192	sll0192	3	3	3	sll0192 hypothetical protein		1	3	3	3	6.4	6.4	6.4	46.318	423	14.5304	14.6272	14.5597	14.5724	14.6845	14.6333	14.6681	14.662	1.06404	0.0690362
sll0195	sll0195	2	2	2	sll0195 probable ATP-dependent protease		1	2	2	2	10.3	10.3	10.3	24.539	214	14.3008	14.324	14.9212	14.5154	14.4455	14.676	14.5441	14.5552	1.02799	0.866629
sll0198	sll0198	1	1	1	sll0198 hypothetical protein		1	1	1	1	5.8	5.8	5.8	21.336	191	13.2622	13.1415	13.2601	13.2212	13.2162	13.1531	13.1974	13.1889	0.977855	0.519158
sll0199	sll0199	5	5	5	sll0199 plastocyanin		1	5	5	5	61.1	61.1	61.1	13.146	126	19.6605	19.6043	19.5509	19.6052	19.6657	19.6147	19.5798	19.6201	1.01036	0.731691
sll0200;sll0650;sll0699;sll1256;sll1436;sll1983;slr0856;slr1715;slr1936;slr2112;slr7104;sll1397;slr1357;slr1075;slr0352;sll1998;sll0431;slr1524;slr8045;sll8043;slr0704;slr0230;ssr1175	sll0200;sll0650;sll0699;sll1256;sll1436;sll1983;slr0856;slr1715;slr1936;slr2112;slr7104;sll1397;slr1357;slr1075;slr0352;sll1998;sll0431;slr1524;slr8045;sll8043;slr0704;slr0230;ssr1175	6;6;6;6;6;6;6;6;6;6;6;5;5;5;5;5;5;5;5;5;4;4;4	6;6;6;6;6;6;6;6;6;6;6;5;5;5;5;5;5;5;5;5;4;4;4	6;6;6;6;6;6;6;6;6;6;6;5;5;5;5;5;5;5;5;5;4;4;4	sll0200 putative transposase [ISY100s: 2524547 - 2525492];sll0650 putative transposase [ISY100j: 421739 - 422684];sll0699 putative transposase [ISY100i: 123475 - 124420];sll1256 putative transposase [ISY100p: 1725405 - 1726350];sll1436 putative transposase		23	6	6	6	33.6	33.6	33.6	13.96	119	15.9121	15.9013	15.8171	15.8768	15.8372	15.7999	15.7783	15.8051	0.951537	0.124872
sll0202	sll0202	13	13	13	sll0202 glucose inhibited division protein		1	13	13	13	19.4	19.4	19.4	70.89	635	16.6812	16.6826	16.6162	16.66	16.7309	16.712	16.67	16.7043	1.03118	0.19574
sll0204	sll0204	7	7	7	sll0204 glucose inhibited division protein		1	7	7	7	16.7	16.7	16.7	50.102	456	14.697	14.6971	14.7802	14.7248	14.5698	14.6837	14.6157	14.6231	0.931949	0.0800305
sll0207	sll0207	7	7	7	sll0207 glucose-1-phosphate thymidylyltransferase		1	7	7	7	17.3	17.3	17.3	42.803	393	16.4375	16.5094	16.506	16.4843	16.6027	16.546	16.5357	16.5614	1.05493	0.0703344
sll0208	sll0208	8	8	8	sll0208 hypothetical protein		1	8	8	8	26.4	26.4	26.4	26.177	231	17.1091	17.1154	17.0449	17.0898	17.4637	17.3213	17.3615	17.3822	1.22467	0.00850761
sll0209	sll0209	10	10	10	sll0209 hypothetical protein		1	10	10	10	28.8	28.8	28.8	37.65	340	17.2199	17.2528	17.2586	17.2438	17.1043	17.0955	17.1077	17.1025	0.906729	0.00420863
sll0216	sll0216	2	2	2	sll0216 hypothetical protein		1	2	2	2	10	10	10	23.86	210	15.0956	15.1252	15.2636	15.1615	15.1488	15.1082	15.0796	15.1122	0.966438	0.449776
sll0219	sll0219	1	1	1	sll0219 flavoprotein		1	1	1	1	2.5	2.5	2.5	65.596	594	8.57699	9.363	9.01323	8.98441	9.40579	9.61658	9.95444	9.65894	1.59608	0.0795194
sll0220	sll0220	17	17	17	sll0220 L-glutamine:D-fructose-6-P amidotransferase		1	17	17	17	33.6	33.6	33.6	69.606	631	17.1505	17.1799	17.1637	17.1647	17.0885	17.1116	17.1038	17.1013	0.957018	0.00502746
sll0221	sll0221	4	4	4	sll0221 bacterioferritin comigratory protein		1	4	4	4	22.3	22.3	22.3	20.376	184	14.0522	14.0526	14.2243	14.1097	14.0359	13.9435	13.8911	13.9569	0.899474	0.104369
sll0222	sll0222	6	6	6	sll0222 putative purple acid phosphatase		1	6	6	6	25.8	25.8	25.8	36.013	326	17.2766	17.2307	17.1291	17.2122	17.3708	17.3131	17.3	17.328	1.0836	0.0996376
sll0223	sll0223	2	2	2	sll0223 NADH dehydrogenase subunit 2		1	2	2	2	3.3	3.3	3.3	55.354	521	14.3385	14.3611	14.2359	14.3118	14.6816	14.6571	14.6146	14.6511	1.2651	0.00446369
sll0224	sll0224	11	11	11	sll0224 amino-acid ABC transporter binding protein		1	11	11	11	44.6	44.6	44.6	32.829	298	17.5585	17.5912	17.6175	17.5891	17.8727	17.8454	17.8448	17.8543	1.20183	0.000749578
sll0226	sll0226	5	5	5	sll0226 photosystem I assembly related protein		1	5	5	5	25.5	25.5	25.5	20.453	188	14.6793	14.776	14.9345	14.7966	14.7764	14.8523	14.8584	14.829	1.02273	0.713856
sll0227	sll0227	7	7	7	sll0227 peptidyl-prolyl cis-trans isomerase B, periplasmic protein		1	7	7	7	32.1	32.1	32.1	26.58	246	16.9189	16.9059	17.0166	16.9472	16.9141	16.8944	16.8829	16.8971	0.965888	0.285986
sll0228	sll0228	5	5	5	sll0228 arginase		1	5	5	5	20.9	20.9	20.9	33.463	306	16.3569	16.4724	16.4779	16.4357	16.3262	16.437	16.419	16.3941	0.971525	0.470982
sll0230	sll0230	5	5	5	sll0230 hypothetical protein		1	5	5	5	61.4	61.4	61.4	10.944	101	15.6356	15.7592	15.6942	15.6963	15.6913	15.7751	15.7586	15.7416	1.03189	0.366236
sll0236	sll0236	14	14	14	sll0236 unknown protein		1	14	14	14	31.7	31.7	31.7	63.918	558	16.8801	16.9467	16.8598	16.8955	16.9458	16.9873	16.9063	16.9465	1.03593	0.221589
sll0237	sll0237	6	6	6	sll0237 unknown protein		1	6	6	6	14.9	14.9	14.9	37.029	343	16.1397	16.1885	16.1594	16.1625	16.2838	16.2377	16.2511	16.2575	1.06808	0.00853986
sll0242	sll0242	3	3	3	sll0242 unknown protein		1	3	3	3	4.2	4.2	4.2	102.32	929	15.8011	15.8213	16.037	15.8865	15.8463	15.8777	15.8868	15.8703	0.988853	0.851269
sll0243	sll0243	3	3	3	sll0243 unknown protein		1	3	3	3	5.5	5.5	5.5	46.721	416	14.746	14.8244	14.6445	14.7383	14.5221	14.5601	14.5062	14.5295	0.865234	0.046772
sll0244	sll0244	5	5	5	sll0244 UDP-glucose 4-epimerase		1	5	5	5	19.2	19.2	19.2	37.13	338	15.1609	15.0888	15.1088	15.1195	15.1414	15.0903	15.1284	15.1201	1.0004	0.983603
sll0245	sll0245	15	15	15	sll0245 probable GTP binding protein		1	15	15	15	54.8	54.8	54.8	39.317	363	18.2275	18.2116	18.2794	18.2395	18.153	18.1901	18.2036	18.1822	0.961085	0.0933067
sll0247	sll0247	3	3	3	sll0247 iron-stress chlorophyll-binding protein, homologous to psbC (CP43)		1	3	3	3	7.9	7.9	7.9	37.22	342	16.3145	16.2564	16.172	16.2476	15.6145	15.6429	15.6423	15.6333	0.653217	0.00314665
sll0248	sll0248	2	2	2	sll0248 flavodoxin		1	2	2	2	17.6	17.6	17.6	18.822	170	13.5856	13.6034	13.5695	13.5862	13.5818	13.4634	13.4402	13.4951	0.938837	0.168274
sll0250	sll0250	5	5	5	sll0250 pantothenate metabolism flavoprotein		1	5	5	5	14.4	14.4	14.4	43.419	402	16.702	16.6628	16.673	16.6793	16.6234	16.5951	16.5488	16.5891	0.939405	0.0340716
sll0253	sll0253	1	1	1	sll0253 hypothetical protein		1	1	1	1	5	5	5	20.143	179	14.6911	14.5663	14.5786	14.612	14.2918	14.3668	14.3538	14.3375	0.826711	0.00767376
sll0254	sll0254	9	9	9	sll0254 probable phytoene dehydrogenase Rieske iron-sulfur component		1	9	9	9	19.8	19.8	19.8	71.843	650	15.1951	15.2343	15.2569	15.2287	15.0419	15.0656	15.1989	15.1021	0.915994	0.109023
sll0258	sll0258	9	9	9	sll0258 cytochrome c550		1	9	9	9	69.4	69.4	69.4	17.884	160	18.6046	18.5611	18.5701	18.5786	18.6277	18.6002	18.668	18.6319	1.03768	0.097467
sll0260	sll0260	5	5	5	sll0260 hypothetical protein		1	5	5	5	15.2	15.2	15.2	49.227	448	14.967	14.9455	15.0078	14.9734	15.0031	14.9524	14.9465	14.9674	0.995804	0.824309
sll0261	sll0261	1	1	1	sll0261 hypothetical protein		1	1	1	1	2.1	2.1	2.1	62.291	568	11.6153	11.9257	11.8678	11.8029	11.8447	11.8281	11.7658	11.8128	1.0069	0.927872
sll0262	sll0262	1	1	1	sll0262 acyl-lipid desaturase (delta 6)		1	1	1	1	3.6	3.6	3.6	41.424	359	13.9524	13.8415	13.8452	13.8797	14.1055	13.9769	13.9298	14.004	1.08999	0.13221
sll0263	sll0263	2	2	2	sll0263 unknown protein		1	2	2	2	12.1	12.1	12.1	27.311	239	13.0204	12.8776	13.1664	13.0215	12.8227	12.5365	12.734	12.6978	0.798997	0.0526849
sll0264	sll0264	1	1	1	sll0264 probable dioxygenase Rieske iron-sulfur component		1	1	1	1	4.4	4.4	4.4	41.099	362	12.0466	12.2947	12.2793	12.2069	12.1864	12.2354	12.4071	12.2763	1.0493	0.543904
sll0267	sll0267	8	8	8	sll0267 unknown protein		1	8	8	8	4.8	4.8	4.8	173.63	1533	15.0304	15.119	15.0744	15.0746	15.1044	15.1769	15.1242	15.1352	1.04289	0.146693
sll0268	sll0268	3	3	3	sll0268 hypothetical protein		1	3	3	3	23	23	23	14.362	135	13.8477	13.9938	14.2747	14.0388	13.8541	13.9428	14.0143	13.9371	0.931928	0.510913
sll0269	sll0269	2	2	2	sll0269 hypothetical protein		1	2	2	2	21.2	21.2	21.2	14.97	137	16.2654	16.2507	16.2343	16.2501	16.0824	16.149	16.1715	16.1343	0.922856	0.0382599
sll0271	sll0271	13	13	12	sll0271 N utilization substance protein B homolog		1	13	13	12	50.2	50.2	47.6	30.59	275	17.0525	17.1363	17.1841	17.1243	17.1195	17.1935	17.2354	17.1828	1.0414	0.318301
sll0272	sll0272	3	3	3	sll0272 hypothetical protein		1	3	3	3	41.1	41.1	41.1	15.78	141	13.6424	13.7945	13.6261	13.6877	13.7951	13.7573	13.8086	13.787	1.07127	0.198946
sll0273	sll0273	6	6	6	sll0273 Na+/H+ antiporter		1	6	6	6	9.6	9.6	9.6	58.116	540	15.9176	15.9259	15.9097	15.9177	16.0141	16.0003	16.2462	16.0869	1.12437	0.167597
sll0274	sll0274	7	7	7	sll0274 hypothetical protein		1	7	7	7	37.8	37.8	37.8	21.473	196	16.4902	16.5011	16.4442	16.4785	16.4591	16.4616	16.4764	16.4657	0.991131	0.543823
sll0280	sll0280	1	1	1	sll0280 unknown protein		1	1	1	1	3.5	3.5	3.5	43.226	367	11.959	12.1705	12.7941	12.3079	12.1925	12.2697	12.4543	12.3055	0.998374	0.993558
sll0281	sll0281	4	4	4	sll0281 unknown protein		1	4	4	4	10	10	10	43.031	390	14.9428	14.8389	14.9907	14.9242	14.83	14.8274	14.7794	14.8123	0.925377	0.116959
sll0283	sll0283	7	7	7	sll0283 hypothetical protein		1	7	7	7	20.4	20.4	20.4	47.541	412	16.1887	16.1462	16.0814	16.1388	16.0789	16.1549	16.1139	16.1159	0.984277	0.584694
sll0284	sll0284	5	5	5	sll0284 hypothetical protein		1	5	5	5	10.4	10.4	10.4	64.697	579	15.3453	15.4109	15.4401	15.3988	15.6003	15.595	15.6003	15.5985	1.14851	0.0187955
sll0286	sll0286	2	2	2	sll0286 hypothetical protein YCF52		1	2	2	2	19.9	19.9	19.9	19.788	171	13.9692	14.0056	13.9914	13.9887	13.9628	13.9618	13.9958	13.9735	0.989481	0.378102
sll0288	sll0288	8	8	8	sll0288 septum site-determining protein MinC		1	8	8	8	34	34	34	26.841	247	16.9592	16.9122	16.8311	16.9008	16.8415	16.8364	16.8476	16.8418	0.959924	0.254986
sll0289	sll0289	10	10	10	sll0289 septum site-determining protein MinD		1	10	10	10	46.6	46.6	46.6	29.047	266	16.6905	16.7115	16.6085	16.6702	16.6819	16.6444	16.6408	16.6557	0.990001	0.702156
sll0290	sll0290	23	23	23	sll0290 polyphosphate kinase		1	23	23	23	37.6	37.6	37.6	82.606	728	18.3709	18.4063	18.3602	18.3791	17.9288	17.959	17.8577	17.9152	0.724997	0.00107202
sll0293	sll0293	2	2	2	sll0293 unknown protein		1	2	2	2	14.1	14.1	14.1	18.583	170	16.128	16.1454	16.2432	16.1722	16.1657	16.1093	16.1167	16.1306	0.971578	0.376453
sll0294	sll0294	2	2	2	sll0294 hypothetical protein		1	2	2	2	6.5	6.5	6.5	45.574	400	10.8864	10.8044	11.3525	11.0144	10.8461	10.5067	10.9534	10.7687	0.843408	0.324701
sll0295	sll0295	3	3	3	sll0295 hypothetical protein		1	3	3	3	11.2	11.2	11.2	31.248	268	14.9508	14.9607	14.9151	14.9422	14.8587	14.8274	14.7756	14.8206	0.919171	0.019798
sll0296	sll0296	2	2	2	sll0296 hypothetical protein		1	2	2	2	11.3	11.3	11.3	20.996	186	12.7859	12.8766	12.7927	12.8184	12.8425	12.7494	12.747	12.7796	0.973474	0.417181
sll0300	sll0300	3	3	3	sll0300 riboflavin synthase alpha chain		1	3	3	3	11.1	11.1	11.1	24.378	226	14.5187	14.5108	14.701	14.5768	14.5973	14.5295	14.556	14.5609	0.989029	0.826368
sll0301	sll0301	6	6	6	sll0301 hypothetical protein		1	6	6	6	37.3	37.3	37.3	18.611	169	16.8639	16.8683	16.7767	16.8363	17.0076	16.8906	16.871	16.9231	1.06199	0.179213
sll0306	sll0306	12	12	11	sll0306 RNA polymerase group 2 sigma factor		1	12	12	11	33.6	33.6	31.3	39.354	345	16.6063	16.5868	16.6285	16.6072	16.7804	16.6656	16.6991	16.7151	1.07763	0.0737215
sll0309	sll0309	2	2	2	sll0309 unknown protein		1	2	2	2	9.9	9.9	9.9	26.949	232	13.7809	13.6704	13.7569	13.7361	13.7743	13.5759	13.6657	13.672	0.956546	0.401455
sll0312	sll0312	5	5	5	sll0312 probable oligopeptides ABC transporter permease protein		1	5	5	5	13.4	13.4	13.4	37.906	337	15.4681	15.4844	15.4688	15.4738	15.5015	15.4966	15.4902	15.4961	1.0156	0.0319754
sll0314	sll0314	10	10	10	sll0314 periplasmic protein, function unknown		1	10	10	10	34.7	34.7	34.7	35.444	314	16.3608	16.3669	16.3978	16.3752	16.5731	16.4768	16.4339	16.4946	1.08632	0.0917815
sll0318	sll0318	4	4	4	sll0318 hypothetical protein		1	4	4	4	21.7	21.7	21.7	24.151	212	14.9985	15.0878	15.095	15.0605	15.0287	15.0441	15.1419	15.0716	1.00773	0.8254
sll0319	sll0319	7	7	7	sll0319 periplasmic protein, function unknown		1	7	7	7	32.7	32.7	32.7	32.315	297	15.6648	15.7729	15.7863	15.7414	16.136	16.0751	16.1302	16.1138	1.29452	0.0034437
sll0320	sll0320	6	6	6	sll0320 probable ribonuclease D		1	6	6	6	33.6	33.6	33.6	24.403	217	16.2676	16.2856	16.3426	16.2986	16.2546	16.2605	16.2983	16.2711	0.981127	0.368673
sll0321	sll0321	3	3	3	sll0321 unknown protein		1	3	3	3	6	6	6	56.04	498	12.9266	13.2046	12.9136	13.0149	12.7811	13.1995	13.2643	13.0817	1.04733	0.731284
sll0325	sll0325	8	8	8	sll0325 hypothetical protein		1	8	8	8	19.4	19.4	19.4	55.546	496	16.0777	16.0419	16.1431	16.0876	16.0075	15.9758	16.0102	15.9978	0.9397	0.0796784
sll0328	sll0328	1	1	1	sll0328 unknown protein		1	1	1	1	5	5	5	15.712	139	14.8247	14.8792	14.959	14.8876	15.4162	15.29	15.3005	15.3356	1.36411	0.00134806
sll0329	sll0329	14	14	14	sll0329 6-phosphogluconate dehydrogenase		1	14	14	14	38.8	38.8	38.8	52.873	482	17.9734	18.0121	18.0736	18.0197	18.0251	18.0169	18.0375	18.0265	1.00472	0.839357
sll0335	sll0335	11	11	11	sll0335 hypothetical protein		1	11	11	11	28.5	28.5	28.5	53.732	481	16.2149	16.1307	16.2471	16.1976	15.9874	15.9965	15.9519	15.9786	0.859191	0.0145068
sll0336	sll0336	10	10	10	sll0336 acetyl-CoA carboxylase beta subunit		1	10	10	10	36.2	36.2	36.2	36.396	326	17.934	17.8778	18.0089	17.9402	17.8986	17.8895	17.8488	17.879	0.958424	0.243373
sll0337	sll0337	7	7	7	sll0337 phosphate sensor, two-component sensor histidine kinase		1	7	7	7	16.2	16.2	16.2	43.634	383	15.7255	15.7516	15.7237	15.7336	15.6349	15.6079	15.6631	15.6353	0.934126	0.0110868
sll0350	sll0350	4	4	4	sll0350 hypothetical protein		1	4	4	4	7.1	7.1	7.1	87.543	803	13.7579	13.7841	13.8071	13.783	13.8226	13.8432	13.9121	13.8593	1.05428	0.0875936
sll0359	sll0359	8	8	8	sll0359 hypothetical protein		1	8	8	8	64.1	64.1	64.1	14.082	128	19.0403	19.008	18.965	19.0044	19.009	19.0001	19.1322	19.0471	1.03002	0.438731
sll0360	sll0360	1	1	1	sll0360 hypothetical protein		1	1	1	1	5.1	5.1	5.1	30.733	277	14.765	14.7768	14.725	14.7556	14.4213	14.4977	14.5054	14.4748	0.823139	0.00214826
sll0361	sll0361	5	5	5	sll0361 hypothetical protein		1	5	5	5	44.2	44.2	44.2	17.187	156	15.3304	15.432	15.3131	15.3585	15.3464	15.3617	15.4091	15.3724	1.00966	0.760834
sll0362	sll0362	26	26	26	sll0362 alanyl-tRNA synthetase		1	26	26	26	31.5	31.5	31.5	96.14	877	18.5961	18.6014	18.6629	18.6201	18.6518	18.622	18.6271	18.6337	1.00941	0.606714
sll0368	sll0368	11	11	11	sll0368 uracil phosphoribosyltransferase		1	11	11	11	66.9	66.9	66.9	19.946	178	17.6834	17.7123	17.6723	17.6893	17.6424	17.6925	17.6599	17.6649	0.983232	0.269043
sll0369	sll0369	2	2	2	sll0369 unknown protein		1	2	2	2	10.6	10.6	10.6	15.913	142	14.5404	14.6131	14.6614	14.605	14.6207	14.7689	14.6836	14.6911	1.06149	0.198586
sll0370	sll0370	36	36	36	sll0370 carbamoyl-phosphate synthase, pyrimidine-specific, large chain		1	36	36	36	36.8	36.8	36.8	121.62	1105	19.2155	19.2413	19.266	19.2409	19.1437	19.1747	19.2128	19.1771	0.956714	0.0669005
sll0373	sll0373	10	10	10	sll0373 gamma-glutamyl phosphate reductase		1	10	10	10	27.3	27.3	27.3	46.349	433	17.1122	17.09	17.0954	17.0992	17.1831	17.1684	17.1608	17.1707	1.05084	0.00156917
sll0374	sll0374	6	6	6	sll0374 urea transport system ATP-binding protein		1	6	6	6	24.9	24.9	24.9	27.424	249	15.3082	15.2942	15.2817	15.2947	15.2467	15.2727	15.278	15.2658	0.980156	0.0826026
sll0376	sll0376	1	1	1	sll0376 unknown protein		1	1	1	1	11.9	11.9	11.9	11.372	101	10.4196	10.5294	10.4201	10.4564	10.502	10.7576	10.5488	10.6028	1.10684	0.195214
sll0377	sll0377	30	30	30	sll0377 transcription-repair coupling factor		1	30	30	30	27.6	27.6	27.6	130.48	1162	17.954	17.9671	18.0161	17.9791	17.9328	17.932	17.964	17.943	0.975281	0.189817
sll0379	sll0379	9	9	9	sll0379 acyl-[acyl-carrier-protein]--UDP-N-acetylglucosamine o-acyltransferase		1	9	9	9	38	38	38	32.073	295	15.9775	16.0899	16.0655	16.0443	16.1678	16.14	16.1532	16.1537	1.07878	0.0781014
sll0380	sll0380	2	2	2	sll0380 probable glycosyltransferase		1	2	2	2	8.2	8.2	8.2	41.173	365	12.8031	12.8841	12.7801	12.8225	12.8033	12.8177	12.7066	12.7759	0.96821	0.378233
sll0381	sll0381	5	5	5	sll0381 hypothetical protein		1	5	5	5	17.3	17.3	17.3	30.985	294	16.249	16.2674	16.2968	16.271	16.4713	16.4452	16.4395	16.452	1.13362	0.000770412
sll0383	sll0383	1	1	1	sll0383 cobalamin biosynthesis protein M		1	1	1	1	4.7	4.7	4.7	22.798	214	12.0337	11.7973	12.1286	11.9865	12.1186	12.1252	12.028	12.0906	1.0748	0.404459
sll0384	sll0384	1	1	1	sll0384 unknown protein		1	1	1	1	3.1	3.1	3.1	28.752	257	11.4238	11.26	11.4187	11.3675	11.516	11.5529	11.6156	11.5615	1.14392	0.0485699
sll0385	sll0385	2	2	2	sll0385 ATP-binding protein of ABC transporter		1	2	2	2	11.6	11.6	11.6	30.854	284	11.7831	12.0025	11.875	11.8868	11.63	11.7904	11.8488	11.7564	0.913552	0.226164
sll0394	sll0394	2	2	2	sll0394 unknown protein		1	2	2	2	12.5	12.5	12.5	22.731	208	13.5818	13.6313	13.5274	13.5802	13.7361	13.5706	13.6153	13.6407	1.04283	0.365974
sll0395	sll0395	7	7	7	sll0395 phosphoglycerate mutase		1	7	7	7	36.3	36.3	36.3	23.752	212	16.8931	16.9318	16.9606	16.9285	17.0001	16.8857	16.9712	16.9523	1.01665	0.587022
sll0396	sll0396	7	7	7	sll0396 two-component response regulator OmpR subfamily		1	7	7	7	32.6	32.6	32.6	25.97	224	17.0499	17.0182	17.0336	17.0339	17.0465	17.0355	17.0358	17.0393	1.00375	0.62672
sll0400	sll0400	2	2	2	sll0400 hypothetical protein		1	2	2	2	14	14	14	18.27	164	13.4521	13.5328	13.2783	13.4211	13.4038	13.4897	13.3991	13.4308	1.00678	0.912555
sll0401	sll0401	9	9	9	sll0401 citrate synthase		1	9	9	9	22.8	22.8	22.8	44.422	394	17.003	16.9522	17.0036	16.9863	17.0034	16.902	16.9114	16.9389	0.96773	0.285516
sll0402	sll0402	14	14	14	sll0402 aspartate aminotransferase		1	14	14	14	47.3	47.3	47.3	42.352	389	17.2436	17.279	17.2442	17.2556	17.2495	17.2458	17.2414	17.2456	0.993089	0.483914
sll0404	sll0404	11	11	11	sll0404 glycolate oxidase subunit GlcD		1	11	11	11	28.7	28.7	28.7	53.032	492	16.5238	16.5399	16.5286	16.5308	16.577	16.5808	16.5357	16.5645	1.02364	0.133912
sll0405	sll0405	2	2	2	sll0405 unknown protein		1	2	2	2	6.1	6.1	6.1	28.985	261	13.8544	13.8311	13.9221	13.8692	14.0258	13.8875	13.8624	13.9252	1.03959	0.401602
sll0406	sll0406	4	4	4	sll0406 unknown protein		1	4	4	4	28.6	28.6	28.6	18.248	161	14.2615	14.3833	14.2945	14.3131	14.3605	14.313	14.4378	14.3704	1.04055	0.327191
sll0408	sll0408	14	14	14	sll0408 peptidyl-prolyl cis-trans isomerase		1	14	14	14	41.8	41.8	41.8	43.909	402	18.7506	18.7535	18.6635	18.7225	18.7093	18.7414	18.7103	18.7203	0.998469	0.948999
sll0409	sll0409	2	2	2	sll0409 similar to O-succinylbenzoate-CoA synthase		1	2	2	2	5.9	5.9	5.9	35.633	320	12.2331	12.317	12.4204	12.3235	12.4097	12.389	12.4556	12.4181	1.06776	0.216273
sll0410	sll0410	4	4	4	sll0410 hypothetical protein		1	4	4	4	22.3	22.3	22.3	18.873	166	15.1945	15.211	15.1425	15.1827	15.3016	15.176	15.1878	15.2218	1.02751	0.449047
sll0412	sll0412	4	4	4	sll0412 hypothetical protein		1	4	4	4	9.5	9.5	9.5	47.506	419	14.7942	14.8488	14.8745	14.8392	14.8435	14.8055	14.8326	14.8272	0.991754	0.68103
sll0413	sll0413	4	4	4	sll0413 hypothetical protein		1	4	4	4	16.9	16.9	16.9	23.086	207	14.9659	14.9939	15.1015	15.0204	15.0832	15.0685	15.0498	15.0672	1.03293	0.375964
sll0414	sll0414	13	13	13	sll0414 hypothetical protein		1	13	13	13	53.5	53.5	53.5	31.501	286	17.9903	18.0229	17.9918	18.0017	17.8313	17.8623	17.8367	17.8434	0.896114	0.000399796
sll0415	sll0415	3	3	3	sll0415 ATP-binding protein of ABC transporter		1	3	3	3	12.1	12.1	12.1	39.5	354	14.6884	14.6094	14.5994	14.6324	14.4826	14.4798	14.7526	14.5717	0.958781	0.577808
sll0416	sll0416	29	29	29	sll0416 60 kDa chaperonin 2, GroEL2, molecular chaperone		1	29	29	29	61.2	61.2	61.2	57.774	552	19.655	19.6685	19.735	19.6862	19.6573	19.6778	19.7323	19.6892	1.00205	0.933794
sll0418	sll0418	5	5	5	sll0418 2-methyl-6-phytylbenzoquinone methyltransferase		1	5	5	5	15.1	15.1	15.1	34.947	318	16.3937	16.3664	16.4341	16.3981	16.3729	16.4351	16.4292	16.4124	1.01	0.634082
sll0420	sll0420	4	4	4	sll0420 urease beta subunit		1	4	4	4	48.6	48.6	48.6	11.382	105	15.7201	15.6933	15.8128	15.7421	15.8833	15.8906	15.8985	15.8908	1.1086	0.0524874
sll0421	sll0421	18	18	18	sll0421 adenylosuccinate lyase		1	18	18	18	45	45	45	48.42	431	18.6127	18.5999	18.7366	18.6498	18.6968	18.6847	18.6427	18.6747	1.01745	0.635047
sll0422	sll0422	14	14	14	sll0422 asparaginase		1	14	14	14	50.2	50.2	50.2	34.894	329	18.7204	18.6706	18.5979	18.663	18.7488	18.6875	18.6641	18.7002	1.02611	0.446747
sll0424	sll0424	5	5	5	sll0424 hypothetical protein		1	5	5	5	8.6	8.6	8.6	59.38	534	14.7558	14.8353	14.8994	14.8302	14.7408	14.6993	14.7326	14.7242	0.929197	0.115273
sll0426	sll0426	1	1	1	sll0426 unknown protein		1	1	1	1	9.2	9.2	9.2	13.331	120	10.681	10.9407	10.5305	10.7174	10.6123	10.4555	10.5822	10.55	0.890472	0.296951
sll0427	sll0427	11	11	11	sll0427 photosystem II manganese-stabilizing polypeptide		1	11	11	11	64.6	64.6	64.6	29.911	274	19.6407	19.619	19.5413	19.6003	19.4557	19.4511	19.4604	19.4557	0.904626	0.0399292
sll0430	sll0430	28	28	28	sll0430 HtpG, heat shock protein 90, molecular chaperone		1	28	28	28	50.5	50.5	50.5	75.029	658	18.4262	18.3733	18.347	18.3822	18.3809	18.3613	18.3562	18.3661	0.988933	0.568524
sll0436	sll0436	4	4	4	sll0436 hypothetical protein		1	4	4	4	23.8	23.8	23.8	17.447	151	16.845	16.8834	16.856	16.8615	16.8483	16.8379	16.7333	16.8065	0.962603	0.269905
sll0441	sll0441	11	11	11	sll0441 unknown protein		1	11	11	11	27.4	27.4	27.4	53.885	460	16.3701	16.415	16.357	16.3807	16.3361	16.3943	16.3409	16.3571	0.983768	0.409026
sll0443	sll0443	12	12	12	sll0443 unknown protein		1	12	12	12	32.4	32.4	32.4	51.061	469	17.092	17.1395	17.156	17.1292	17.2994	17.2802	17.3013	17.2936	1.12076	0.00756978
sll0445	sll0445	6	6	6	sll0445 unknown protein		1	6	6	6	12.3	12.3	12.3	54.394	495	16.6574	16.6196	16.7977	16.6915	16.7478	16.6817	16.6966	16.7087	1.01197	0.788926
sll0446	sll0446	33	33	33	sll0446 unknown protein		1	33	33	33	36.8	36.8	36.8	120.98	1072	18.2886	18.3526	18.1935	18.2782	18.4492	18.475	18.4914	18.4719	1.14363	0.0447082
sll0447	sll0447	9	9	9	sll0447 unknown protein		1	9	9	9	36.1	36.1	36.1	28.065	241	17.4438	17.3745	17.3993	17.4059	17.6426	17.5545	17.5379	17.5783	1.127	0.0160467
sll0448	sll0448	1	1	1	sll0448 unknown protein		1	1	1	1	2	2	2	45.112	401	13.0256	13.0701	13.2546	13.1168	13.5423	13.4234	13.3865	13.4507	1.26044	0.0216728
sll0449	sll0449	3	3	3	sll0449 unknown protein		1	3	3	3	8.6	8.6	8.6	42.661	372	15.156	15.1843	15.1717	15.1707	15.4723	15.488	15.5099	15.4901	1.24779	3.5539e-05
sll0450	sll0450	2	2	2	sll0450 cytochrome b subunit of nitric oxide reductase		1	2	2	2	4.3	4.3	4.3	81.292	736	13.8169	13.7049	13.9271	13.8163	13.4661	13.4628	13.3566	13.4285	0.764289	0.0117905
sll0451	sll0451	3	3	3	sll0451 hypothetical protein		1	3	3	3	21.4	21.4	21.4	17.612	154	14.6744	14.8028	14.609	14.6954	14.7132	14.6778	14.7325	14.7079	1.00869	0.84998
sll0454	sll0454	15	15	15	sll0454 phenylalanyl-tRNA synthetase alpha chain		1	15	15	15	52	52	52	37.124	331	17.6178	17.7014	17.6641	17.6611	17.5144	17.5158	17.7881	17.6061	0.962597	0.61184
sll0455	sll0455	7	7	7	sll0455 homoserine dehydrogenase		1	7	7	7	17.3	17.3	17.3	45.486	433	16.4573	16.4004	16.4154	16.4244	16.4627	16.3851	16.3855	16.4111	0.990857	0.693525
sll0456	sll0456	6	6	6	sll0456 hypothetical protein		1	6	6	6	23.1	23.1	23.1	37.436	333	16.8994	17.0348	16.4743	16.8028	16.5584	16.671	16.6304	16.6199	0.880935	0.392296
sll0459	sll0459	24	24	24	sll0459 excinuclease ABC subunit B		1	24	24	24	36.6	36.6	36.6	76.848	669	17.3231	17.2885	17.3984	17.3367	17.2983	17.2652	17.3657	17.3097	0.981522	0.573327
sll0461	sll0461	10	10	10	sll0461 gamma-glutamyl phosphate reductase		1	10	10	10	25.2	25.2	25.2	45.772	420	16.8146	16.811	16.8379	16.8212	16.8765	16.8813	16.8456	16.8678	1.03283	0.0327179
sll0462	sll0462	1	1	1	sll0462 hypothetical protein		1	1	1	1	5.7	5.7	5.7	40.73	366	13.0776	12.9456	12.9074	12.9769	13.0382	13.0543	12.6599	12.9175	0.959674	0.701388
sll0467	sll0467	5	5	5	sll0467 S-adenosylmethionine:tRNA ribosyltransferase-isomerase		1	5	5	5	16.1	16.1	16.1	41.186	366	15.0718	15.0482	15.0509	15.057	15.1756	15.1016	15.1253	15.1342	1.05496	0.0589246
sll0469	sll0469	12	12	12	sll0469 ribose-phosphate pyrophosphokinase		1	12	12	12	49.2	49.2	49.2	36.395	333	17.1006	17.1375	17.3225	17.1869	17.1122	17.1618	17.1892	17.1544	0.977714	0.68982
sll0470	sll0470	4	4	4	sll0470 hypothetical protein		1	4	4	4	24.2	24.2	24.2	20.719	186	14.8608	14.8979	14.7334	14.8307	14.5502	14.4703	14.506	14.5089	0.800057	0.0117278
sll0471	sll0471	3	3	3	sll0471 hypothetical protein		1	3	3	3	5.4	5.4	5.4	76.398	684	14.8477	14.9609	15.0585	14.9557	15.2442	15.2893	15.2489	15.2608	1.23549	0.0319783
sll0477	sll0477	3	3	3	sll0477 putative biopolymer transport ExbB-like protein		1	3	3	3	9.4	9.4	9.4	28.18	254	14.8967	15.0326	15.1988	15.0427	15.1177	15.1613	15.5833	15.2874	1.18486	0.244177
sll0480	sll0480	15	15	15	sll0480 probable aminotransferase		1	15	15	15	47.6	47.6	47.6	45.087	412	18.4854	18.4679	18.4685	18.4739	18.4365	18.4358	18.4206	18.431	0.970646	0.00528364
sll0481	sll0481	1	1	1	sll0481 unknown protein		1	1	1	1	6.5	6.5	6.5	17.362	155	13.8658	13.9858	13.8398	13.8971	13.6258	13.7515	13.6411	13.6728	0.855998	0.0206454
sll0482	sll0482	7	7	7	sll0482 unknown protein		1	7	7	7	21.8	21.8	21.8	42.959	385	15.6672	15.5936	15.8309	15.6973	15.6603	15.6628	15.7163	15.6798	0.987985	0.829907
sll0484	sll0484	4	4	4	sll0484 ATP-binding protein of ABC transporter		1	4	4	4	19.2	19.2	19.2	26.671	245	14.7265	14.7099	14.7671	14.7345	14.6981	14.5806	14.5744	14.6177	0.922241	0.0847652
sll0485	sll0485	6	6	6	sll0485 two-component response regulator NarL subfamily		1	6	6	6	17.1	17.1	17.1	34.124	299	15.7817	15.7823	15.7918	15.7853	15.8134	15.7097	15.7353	15.7528	0.977733	0.4068
sll0486	sll0486	2	2	2	sll0486 circadian clock protein KaiB homolog		1	2	2	2	18.6	18.6	18.6	11.657	102	14.3472	14.3916	14.5426	14.4271	14.3363	14.4539	14.4317	14.4073	0.986373	0.792027
sll0487	sll0487	11	11	11	sll0487 hypothetical protein		1	11	11	11	25.9	25.9	25.9	45.847	402	16.6512	16.6203	16.6565	16.6427	16.7452	16.6978	16.6835	16.7088	1.04693	0.0498614
[truncated: 2,375 more rows]
