# Supplementary material for: Proteomic analysis of the regulatory networks of ClpX in a model cyanobacterium Synechocystis sp. PCC 6803
Source: Front Plant Sci. 2022 Sep 29;13:994056. doi: 10.3389/fpls.2022.994056 (PMC9560874; doi:10.3389/fpls.2022.994056)
Supplement: Supplementary file 6 [file Table_5.xlsx]

## Sheet: Table S5
Table S5. List of differentially expressed proteins in Synechocystis sp. PCC 6803
Protein IDs	Majority protein IDs	Peptide counts (unique)	Description	Ratio(ClpX/WT)	p-Value	Regulated type
slr6075;slr6016	slr6075;slr6016	8;8	unknown protein;unknown protein	1.27641	0.00011767	up-regulated
slr6071;slr6012	slr6071;slr6012	37;37	unknown protein;unknown protein	1.40204	0.000383324	up-regulated
slr6073;slr6014	slr6073;slr6014	12;12	unknown protein;unknown protein	1.29685	0.00618176	up-regulated
slr6074;slr6015	slr6074;slr6015	10;10	unknown protein;unknown protein	1.38681	0.00029997	up-regulated
slr0869	slr0869	38	hypothetical protein	1.23568	0.000413031	up-regulated
sll7090	sll7090	25	unknown protein	1.26662	0.000187022	up-regulated
sll7066	sll7066	23	unknown protein	1.21633	0.02294	up-regulated
sll7063	sll7063	22	unknown protein	1.35908	0.00206125	up-regulated
sll0533	sll0533	20	trigger factor	1.3008	0.00133717	up-regulated
sll7085	sll7085	18	unknown protein	1.33493	0.000212877	up-regulated
slr0105	slr0105	18	hypothetical protein	1.23155	0.000901095	up-regulated
slr1919	slr1919	17	hypothetical protein	1.32485	0.00474564	up-regulated
slr1227	slr1227	16	chloroplastic outer envelope membrane protein homolog	1.50898	1.78994e-05	up-regulated
sll0002	sll0002	15	penicillin-binding protein	1.22988	0.0233249	up-regulated
sll0005	sll0005	15	hypothetical protein	1.35933	0.00573425	up-regulated
slr1788	slr1788	15	unknown protein	1.30346	0.000122909	up-regulated
sll1802	sll1802	14	50S ribosomal protein L2	1.22687	0.00476438	up-regulated
slr1270	slr1270	14	periplasmic protein, function unknown	1.28294	0.00683402	up-regulated
sll7065	sll7065	12	unknown protein	1.21232	0.0154927	up-regulated
slr0552	slr0552	12	hypothetical protein	1.35738	5.61403e-05	up-regulated
sll0224	sll0224	11	amino-acid ABC transporter binding protein	1.20183	0.000749578	up-regulated
sll7067	sll7067	11	unknown protein	1.23778	0.000381994	up-regulated
sll1679	sll1679	10	periplasmic protease HhoA	1.23629	0.00196102	up-regulated
slr0955	slr0955	10	probable tRNA/rRNA methyltransferase	1.50199	6.51997e-05	up-regulated
sll1002	sll1002	9	hypothetical protein YCF22	1.22459	0.0018251	up-regulated
sll1280	sll1280	9	hypothetical protein	1.43419	5.97276e-05	up-regulated
slr0937	slr0937	9	unknown protein	1.2251	0.0231603	up-regulated
slr1331	slr1331	9	periplasmic processing protease	1.25894	0.00274974	up-regulated
sll0208	sll0208	8	hypothetical protein	1.22467	0.00850761	up-regulated
sll1009	sll1009	8	unknown protein	2.41048	0.000215145	up-regulated
sll7087	sll7087	8	unknown protein	1.27431	0.000149997	up-regulated
slr0366	slr0366	8	unknown protein	1.21849	0.0110209	up-regulated
slr0420	slr0420	8	hypothetical protein	1.21862	0.00223254	up-regulated
slr0553	slr0553	8	hypothetical protein	1.25944	0.00112341	up-regulated
slr1272	slr1272	8	probable porin; major outer membrane protein	1.58459	6.05313e-06	up-regulated
slr1753	slr1753	8	hypothetical protein	1.22936	0.00150319	up-regulated
sll0319	sll0319	7	periplasmic protein, function unknown	1.29452	0.0034437	up-regulated
sll0689	sll0689	7	Na+/H+ antiporter	1.228	0.000538255	up-regulated
sll1807	sll1807	7	50S ribosomal protein L24	1.76663	0.000260519	up-regulated
sll1817	sll1817	7	30S ribosomal protein S11	1.27845	0.0124393	up-regulated
slr0319	slr0319	7	beta-lactamase	1.43094	0.0064979	up-regulated
slr0364	slr0364	7	hypothetical protein	1.3383	0.00177759	up-regulated
slr1564	slr1564	7	group 3 RNA polymerase sigma factor	1.28199	0.00607912	up-regulated
sll0141	sll0141	6	hypothetical protein	1.33795	0.000802427	up-regulated
sll1350	sll1350	6	hypothetical protein	1.2987	0.00653495	up-regulated
sll1378	sll1378	6	periplasmic protein, function unknown	1.81874	9.24473e-05	up-regulated
sll1949	sll1949	6	unknown protein	1.46734	0.00105074	up-regulated
slr1160	slr1160	6	periplasmic protein, function unknown	1.222	0.000133485	up-regulated
slr1841	slr1841	6	probable porin; major outer membrane protein	1.3748	2.05217e-05	up-regulated
sll0767	sll0767	5	50S ribosomal protein L20	1.45848	0.000737967	up-regulated
sll0834	sll0834	5	low affinity sulfate transporter	1.24753	0.00190778	up-regulated
sll1598	sll1598	5	Mn transporter MntC	1.27496	0.0206485	up-regulated
sll1885	sll1885	5	unknown protein	1.36532	0.000252241	up-regulated
slr0294	slr0294	5	unknown protein	1.48135	0.0143184	up-regulated
slr0514	slr0514	5	unknown protein	1.20978	0.0106962	up-regulated
slr0550	slr0550	5	dihydrodipicolinate synthase	1.33597	0.0101986	up-regulated
slr0646	slr0646	5	probable D-alanyl-D-alanine carboxypeptidase	1.44099	3.23843e-05	up-regulated
slr1485	slr1485	5	putative phosphatidylinositol phosphate kinase, salt-induced periplasmic protein	1.39325	0.00133232	up-regulated
slr1870	slr1870	5	hypothetical protein	1.21071	0.0145055	up-regulated
sll0555	sll0555	4	methionine aminopeptidase	1.24059	0.0121005	up-regulated
sll0777	sll0777	4	putative carboxypeptidase	1.38354	0.002933	up-regulated
sll7064	sll7064	4	unknown protein	1.26154	0.00431756	up-regulated
sll7086	sll7086	4	unknown protein	1.36	0.000408572	up-regulated
sll7089	sll7089	4	unknown protein	1.47611	0.000583576	up-regulated
slr0121	slr0121	4	hypothetical protein	1.26925	0.0128203	up-regulated
slr0401	slr0401	4	periplasmic polyamine-binding protein of ABC transporter	1.21714	3.10251e-05	up-regulated
slr0793	slr0793	4	cation efflux system protein involved in nickel and cobalt tolerance	2.23347	0.0114542	up-regulated
slr1415	slr1415	4	hypothetical protein	1.27457	0.0103551	up-regulated
slr1608	slr1608	4	putative glucose dehydrogenase-B, periplasmic protein	1.43691	0.000351629	up-regulated
slr1882	slr1882	4	riboflavin biosynthesis protein RibF	1.21063	0.0322916	up-regulated
sll0449	sll0449	3	unknown protein	1.24779	3.5539e-05	up-regulated
sll0471	sll0471	3	hypothetical protein	1.23549	0.0319783	up-regulated
sll1096	sll1096	3	30S ribosomal protein S12	1.31906	0.0189003	up-regulated
sll1736	sll1736	3	hypothetical protein	1.23063	0.0236009	up-regulated
slr0327	slr0327	3	iron(III) ABC transporter, permease protein	1.28356	0.027728	up-regulated
slr1512	slr1512	3	sodium-dependent bicarbonate transporter	1.24406	0.0299289	up-regulated
slr1661	slr1661	3	hypothetical protein	1.33317	0.0158527	up-regulated
slr1774	slr1774	3	unknown protein	1.27172	0.000220414	up-regulated
slr5111	slr5111	3	unknown protein	1.58316	0.00159399	up-regulated
sll0223	sll0223	2	NADH dehydrogenase subunit 2	1.2651	0.00446369	up-regulated
sll0932	sll0932	2	hypothetical protein	1.25454	0.00365233	up-regulated
sll1882	sll1882	2	unknown protein	1.28147	0.0414477	up-regulated
sll7070	sll7070	2	unknown protein	1.30053	0.0397902	up-regulated
slr0601	slr0601	2	unknown protein	1.29125	0.00953232	up-regulated
slr0770	slr0770	2	hypothetical protein	1.24449	0.0154643	up-regulated
slr1186	slr1186	2	hypothetical protein	1.27175	0.0106185	up-regulated
slr1204	slr1204	2	protease	1.26635	0.0035955	up-regulated
slr1369	slr1369	2	phosphatidate cytidylyltransferase	1.23817	0.00233829	up-regulated
slr7013	slr7013	2	hypothetical protein	1.26281	0.0258505	up-regulated
ssl1426	ssl1426	2	50S ribosomal protein L35	1.34871	0.00372151	up-regulated
ssl2598	ssl2598	2	photosystem II PsbH protein	2.13086	0.00129454	up-regulated
ssl6092	ssl6092	2	unknown protein	1.43361	0.00300116	up-regulated
ssr1789	ssr1789	2	CAB/ELIP/HLIP-related protein HliD	1.4403	0.00162228	up-regulated
ssr1951	ssr1951	2	hypothetical protein	1.20343	0.0165022	up-regulated
slr6039;sll0788	slr6039;sll0788	6;6	hypothetical protein;hypothetical protein	0.782808	0.00717834	down-regulated
sll1294	sll1294	35	methyl-accepting chemotaxis protein	0.774466	0.00454732	down-regulated
sll0654	sll0654	33	alkaline phosphatase	0.638796	0.000484645	down-regulated
slr0288	slr0288	25	glutamate--ammonia ligase	0.826227	0.000485587	down-regulated
slr1855	slr1855	25	unknown protein	0.795026	0.000381646	down-regulated
sll0290	sll0290	23	polyphosphate kinase	0.724997	0.00107202	down-regulated
sll0723	sll0723	22	unknown protein	0.756191	4.32393e-06	down-regulated
sll0656	sll0656	17	unknown protein	0.72507	0.00766342	down-regulated
sll1296	sll1296	15	two-component hybrid sensor and regulator	0.804367	0.0062174	down-regulated
sll0679	sll0679	13	periplasmic phosphate-binding protein of ABC transporter	0.558463	3.88681e-05	down-regulated
sll1536	sll1536	13	molybdopterin biosynthesis MoeB protein	0.816925	0.00571323	down-regulated
slr1945	slr1945	13	2,3-bisphosphoglycerate-independent phosphoglycerate mutase	0.816149	0.000163232	down-regulated
sll0680	sll0680	12	phosphate-binding periplasmic protein precursor (PBP)	0.398914	0.000106931	down-regulated
slr1247	slr1247	12	phosphate-binding periplasmic protein precursor (PBP)	0.471018	7.14659e-05	down-regulated
slr1852	slr1852	12	unknown protein	0.694024	0.00818314	down-regulated
sll1785	sll1785	11	periplasmic protein, function unknown	0.822347	0.0037748	down-regulated
slr1672	slr1672	11	glycerol kinase	0.397686	0.000187582	down-regulated
sll0683	sll0683	10	phosphate transport ATP-binding protein PstB homolog	0.289375	0.000437045	down-regulated
sll1552	sll1552	10	unknown protein	0.456577	8.49808e-05	down-regulated
slr0798	slr0798	10	zinc-transporting P-type ATPase (zinc efflux pump) involved in zinc tolerance	0.643713	0.00287913	down-regulated
sll0684	sll0684	9	phosphate transport ATP-binding protein PstB homolog	0.379579	0.000951086	down-regulated
slr1857	slr1857	9	isoamylase	0.772232	0.00369216	down-regulated
sll1304	sll1304	8	unknown protein	0.776521	0.0295305	down-regulated
slr1535	slr1535	8	hypothetical protein	0.561514	5.65985e-05	down-regulated
slr1860	slr1860	8	carbon metabolisms regulatory protein IcfG	0.807495	0.00342716	down-regulated
sll0754	sll0754	7	ribosome binding factor A	0.825081	0.00228797	down-regulated
slr1403	slr1403	7	unknown protein	0.671315	0.00198977	down-regulated
slr1407	slr1407	7	unknown protein	0.735506	0.00169452	down-regulated
slr1854	slr1854	7	unknown protein	0.707808	0.00189443	down-regulated
slr2016	slr2016	7	type 4 pilin-like protein, essential for motility	0.750224	4.73048e-05	down-regulated
sll0685	sll0685	6	hypothetical protein	0.630198	0.000238557	down-regulated
sll1305	sll1305	6	probable hydrolase	0.288281	0.000117475	down-regulated
sll1783	sll1783	6	hypothetical protein	0.760006	0.00215697	down-regulated
sll1784	sll1784	6	periplasmic protein, function unknown	0.811738	0.00879797	down-regulated
slr0666	slr0666	6	unknown protein	0.728869	0.000354285	down-regulated
slr1681	slr1681	6	unknown protein	0.80876	0.00245477	down-regulated
slr1851	slr1851	6	hypothetical protein	0.828784	0.0232887	down-regulated
slr2030	slr2030	6	hypothetical protein	0.804896	0.00311518	down-regulated
slr0380	slr0380	5	hypothetical protein	0.776543	0.00286416	down-regulated
slr0983	slr0983	5	glucose-1-phosphate cytidylyltransferase	0.813957	0.00824476	down-regulated
slr1853	slr1853	5	carboxymuconolactone decarboxylase	0.639225	0.000569778	down-regulated
ssl1911	ssl1911	5	glutamine synthetase inactivating factor IF7	0.559212	0.000967809	down-regulated
sll0470	sll0470	4	hypothetical protein	0.800057	0.0117278	down-regulated
sll0721	sll0721	4	unknown protein	0.807853	0.00158411	down-regulated
sll1118	sll1118	4	hypothetical protein	0.743966	0.000944384	down-regulated
sll1220	sll1220	4	putative diaphorase subunit of the bidirectional hydrogenase	0.803292	0.00185426	down-regulated
slr1077	slr1077	4	probable glycosyltransferase	0.759132	0.0129974	down-regulated
slr1576	slr1576	4	unknown protein	0.783522	0.000202329	down-regulated
slr1859	slr1859	4	anti-sigma f factor antagonist	0.666863	0.000244062	down-regulated
ssl2559	ssl2559	4	ferredoxin	0.706803	0.000606462	down-regulated
sll0247	sll0247	3	iron-stress chlorophyll-binding protein, homologous to psbC (CP43)	0.653217	0.00314665	down-regulated
sll0639	sll0639	3	hypothetical protein	0.787756	0.0114136	down-regulated
sll0681	sll0681	3	phosphate transport system permease protein PstC homolog	0.509139	0.0108182	down-regulated
sll0744	sll0744	3	hypothetical protein	0.831862	0.0256533	down-regulated
sll0745	sll0745	3	phosphofructokinase	0.822766	0.0340219	down-regulated
sll0783	sll0783	3	unknown protein	0.636073	0.000245058	down-regulated
sll1182	sll1182	3	cytochrome b6-f complex alternative iron-sulfur subunit (Rieske iron sulfur protein)	0.780029	0.0126917	down-regulated
sll1193	sll1193	3	hypothetical protein	0.80424	0.00451862	down-regulated
sll1293	sll1293	3	unknown protein	0.659729	0.0247411	down-regulated
sll1330	sll1330	3	two-component system response regulator OmpR subfamily	0.750973	0.00751941	down-regulated
sll5075	sll5075	3	hypothetical protein	0.831144	0.0302671	down-regulated
slr0602	slr0602	3	unknown protein	0.712408	0.00135789	down-regulated
slr1150	slr1150	3	unknown protein	0.815636	0.0365301	down-regulated
slr1248	slr1248	3	phosphate transport system permease protein PstC homolog	0.559516	0.000163714	down-regulated
slr1260	slr1260	3	hypothetical protein	0.829677	0.0181876	down-regulated
slr1420	slr1420	3	probable sugar kinase	0.267051	0.000217162	down-regulated
slr8022	slr8022	3	hypothetical protein	0.770692	0.0107744	down-regulated
ssl2296	ssl2296	3	pterin-4a-carbinolamine dehydratase	0.752725	0.0231188	down-regulated
ssr0657	ssr0657	3	hypothetical protein	0.741629	0.00189122	down-regulated
sll0450	sll0450	2	cytochrome b subunit of nitric oxide reductase	0.764289	0.0117905	down-regulated
sll0595	sll0595	2	unknown protein	0.80606	0.00292305	down-regulated
sll1590	sll1590	2	two-component sensor histidine kinase	0.687388	0.0276518	down-regulated
slr0607	slr0607	2	hypothetical protein	0.762804	0.0211703	down-regulated
slr0753	slr0753	2	probable transport protein	0.624296	0.0101118	down-regulated
slr1114	slr1114	2	hypothetical protein	0.688728	0.0011468	down-regulated
slr1396	slr1396	2	unknown protein	0.587321	0.0416602	down-regulated
slr1856	slr1856	2	phosphoprotein substrate of icfG gene cluster	0.817374	0.000490653	down-regulated
ssr1407	ssr1407	2	hypothetical protein	0.760368	0.0166232	down-regulated
