# Supplementary material for: Proteomic analysis of the regulatory networks of ClpX in a model cyanobacterium Synechocystis sp. PCC 6803
Source: Front Plant Sci. 2022 Sep 29;13:994056. doi: 10.3389/fpls.2022.994056 (PMC9560874; doi:10.3389/fpls.2022.994056)
Supplement: Supplementary file 7 [file Table_6.xlsx]

## Sheet: Table S6A
Table S6A. GO annotation of up-regulated DEPs.
Level	GO_ID	GO term	gene number	(percentage)	term discription
Level 2	GO:0005623	Cellular Component	12	23.1	cell
Level 2	GO:0044464	Cellular Component	12	23.1	cell part
Level 2	GO:0043226	Cellular Component	7	13.5	organelle
Level 2	GO:0044422	Cellular Component	3	5.8	organelle part
Level 2	GO:0016020	Cellular Component	10	19.2	membrane
Level 2	GO:0044425	Cellular Component	4	7.7	membrane part
Level 2	GO:0032991	Cellular Component	7	13.5	protein-containing complex
Level 2	GO:0003824	Molecular Function	29	55.8	catalytic activity
Level 2	GO:0005488	Molecular Function	25	48.1	binding
Level 2	GO:0005215	Molecular Function	9	17.3	transporter activity
Level 2	GO:0005198	Molecular Function	6	11.5	structural molecule activity
Level 2	GO:0140110	Molecular Function	1	1.9	transcription regulator activity
Level 2	GO:0004239	Molecular Function	1	1.9	obsolete methionyl aminopeptidase activity
Level 2	GO:0071840	Biological Process	2	3.8	cellular component organization or biogenesis
Level 2	GO:0009987	Biological Process	25	48.1	cellular process
Level 2	GO:0008152	Biological Process	33	63.5	metabolic process
Level 2	GO:0051179	Biological Process	11	21.2	localization
Level 2	GO:0050896	Biological Process	2	3.8	response to stimulus
Level 2	GO:0022610	Biological Process	1	1.9	biological adhesion
Level 2	GO:0065007	Biological Process	4	7.7	biological regulation
Level 2	GO:0050789	Biological Process	2	3.8	regulation of biological process
Level 3	GO:0005622	Cellular Component	8	15.4	intracellular
Level 3	GO:0044424	Cellular Component	8	15.4	intracellular part
Level 3	GO:0044446	Cellular Component	3	5.8	intracellular organelle part
Level 3	GO:0043229	Cellular Component	7	13.5	intracellular organelle
Level 3	GO:0031975	Cellular Component	4	7.7	envelope
Level 3	GO:0030312	Cellular Component	1	1.9	external encapsulating structure
Level 3	GO:0071944	Cellular Component	1	1.9	cell periphery
Level 3	GO:0042597	Cellular Component	3	5.8	periplasmic space
Level 3	GO:0043227	Cellular Component	1	1.9	membrane-bounded organelle
Level 3	GO:0031090	Cellular Component	1	1.9	organelle membrane
Level 3	GO:0043228	Cellular Component	6	11.5	non-membrane-bounded organelle
Level 3	GO:0098805	Cellular Component	1	1.9	whole membrane
Level 3	GO:0019867	Cellular Component	2	3.8	outer membrane
Level 3	GO:0034357	Cellular Component	1	1.9	photosynthetic membrane
Level 3	GO:0098796	Cellular Component	1	1.9	membrane protein complex
Level 3	GO:0031224	Cellular Component	3	5.8	intrinsic component of membrane
Level 3	GO:1990904	Cellular Component	6	11.5	ribonucleoprotein complex
Level 3	GO:0016787	Molecular Function	13	25	hydrolase activity
Level 3	GO:0016740	Molecular Function	9	17.3	transferase activity
Level 3	GO:0140096	Molecular Function	11	21.2	catalytic activity, acting on a protein
Level 3	GO:0016491	Molecular Function	4	7.7	oxidoreductase activity
Level 3	GO:0016829	Molecular Function	2	3.8	lyase activity
Level 3	GO:0140097	Molecular Function	1	1.9	catalytic activity, acting on DNA
Level 3	GO:0140098	Molecular Function	1	1.9	catalytic activity, acting on RNA
Level 3	GO:0016853	Molecular Function	1	1.9	isomerase activity
Level 3	GO:1901363	Molecular Function	12	23.1	heterocyclic compound binding
Level 3	GO:0097159	Molecular Function	12	23.1	organic cyclic compound binding
Level 3	GO:0043167	Molecular Function	12	23.1	ion binding
Level 3	GO:0005515	Molecular Function	3	5.8	protein binding
Level 3	GO:0008144	Molecular Function	6	11.5	drug binding
Level 3	GO:0036094	Molecular Function	6	11.5	small molecule binding
Level 3	GO:0097367	Molecular Function	4	7.7	carbohydrate derivative binding
Level 3	GO:0019808	Molecular Function	1	1.9	polyamine binding
Level 3	GO:1901681	Molecular Function	2	3.8	sulfur compound binding
Level 3	GO:0033218	Molecular Function	2	3.8	amide binding
Level 3	GO:0048037	Molecular Function	1	1.9	cofactor binding
Level 3	GO:0022857	Molecular Function	6	11.5	transmembrane transporter activity
Level 3	GO:0008565	Molecular Function	2	3.8	protein transporter activity
Level 3	GO:0003735	Molecular Function	6	11.5	structural constituent of ribosome
Level 3	GO:0016987	Molecular Function	1	1.9	sigma factor activity
Level 3	GO:0003700	Molecular Function	1	1.9	DNA-binding transcription factor activity
Level 3	GO:0044085	Biological Process	2	3.8	cellular component biogenesis
Level 3	GO:0071554	Biological Process	2	3.8	cell wall organization or biogenesis
Level 3	GO:0044237	Biological Process	23	44.2	cellular metabolic process
Level 3	GO:0050794	Biological Process	2	3.8	regulation of cellular process
Level 3	GO:0006457	Biological Process	1	1.9	protein folding
Level 3	GO:0032940	Biological Process	1	1.9	secretion by cell
Level 3	GO:0071704	Biological Process	28	53.8	organic substance metabolic process
Level 3	GO:0006807	Biological Process	26	50	nitrogen compound metabolic process
Level 3	GO:0044281	Biological Process	6	11.5	small molecule metabolic process
Level 3	GO:0009058	Biological Process	14	26.9	biosynthetic process
Level 3	GO:0044238	Biological Process	24	46.2	primary metabolic process
Level 3	GO:0055114	Biological Process	1	1.9	oxidation-reduction process
Level 3	GO:0009056	Biological Process	2	3.8	catabolic process
Level 3	GO:0019222	Biological Process	2	3.8	regulation of metabolic process
Level 3	GO:0032259	Biological Process	1	1.9	methylation
Level 3	GO:0051234	Biological Process	11	21.2	establishment of localization
Level 3	GO:0033036	Biological Process	3	5.8	macromolecule localization
Level 3	GO:0051641	Biological Process	1	1.9	cellular localization
Level 3	GO:0042221	Biological Process	2	3.8	response to chemical
Level 3	GO:0007155	Biological Process	1	1.9	cell adhesion
Level 3	GO:0065008	Biological Process	2	3.8	regulation of biological quality
Level 4	GO:0031968	Cellular Component	1	1.9	organelle outer membrane
Level 4	GO:0031967	Cellular Component	1	1.9	organelle envelope
Level 4	GO:0044391	Cellular Component	2	3.8	ribosomal subunit
Level 4	GO:0043231	Cellular Component	1	1.9	intracellular membrane-bounded organelle
Level 4	GO:0043232	Cellular Component	6	11.5	intracellular non-membrane-bounded organelle
Level 4	GO:0009521	Cellular Component	1	1.9	photosystem
Level 4	GO:0030313	Cellular Component	3	5.8	cell envelope
Level 4	GO:0030288	Cellular Component	3	5.8	outer membrane-bounded periplasmic space
Level 4	GO:0005618	Cellular Component	1	1.9	cell wall
Level 4	GO:0042170	Cellular Component	1	1.9	plastid membrane
Level 4	GO:0098588	Cellular Component	1	1.9	bounding membrane of organelle
Level 4	GO:0005840	Cellular Component	6	11.5	ribosome
Level 4	GO:0016021	Cellular Component	3	5.8	integral component of membrane
Level 4	GO:0016817	Molecular Function	2	3.8	hydrolase activity, acting on acid anhydrides
Level 4	GO:0008233	Molecular Function	8	15.4	peptidase activity
Level 4	GO:0017171	Molecular Function	3	5.8	serine hydrolase activity
Level 4	GO:0016810	Molecular Function	3	5.8	hydrolase activity, acting on carbon-nitrogen (but not peptide) bonds
Level 4	GO:0016772	Molecular Function	5	9.6	transferase activity, transferring phosphorus-containing groups
Level 4	GO:0004672	Molecular Function	2	3.8	protein kinase activity
Level 4	GO:0016757	Molecular Function	1	1.9	transferase activity, transferring glycosyl groups
Level 4	GO:0016741	Molecular Function	2	3.8	transferase activity, transferring one-carbon groups
Level 4	GO:0008173	Molecular Function	1	1.9	RNA methyltransferase activity
Level 4	GO:0003755	Molecular Function	1	1.9	peptidyl-prolyl cis-trans isomerase activity
Level 4	GO:0016614	Molecular Function	1	1.9	oxidoreductase activity, acting on CH-OH group of donors
Level 4	GO:0016651	Molecular Function	1	1.9	oxidoreductase activity, acting on NAD(P)H
Level 4	GO:0016830	Molecular Function	1	1.9	carbon-carbon lyase activity
Level 4	GO:0016835	Molecular Function	1	1.9	carbon-oxygen lyase activity
Level 4	GO:0000150	Molecular Function	1	1.9	recombinase activity
Level 4	GO:0016859	Molecular Function	1	1.9	cis-trans isomerase activity
Level 4	GO:0003676	Molecular Function	6	11.5	nucleic acid binding
Level 4	GO:1901265	Molecular Function	4	7.7	nucleoside phosphate binding
Level 4	GO:0005524	Molecular Function	4	7.7	ATP binding
Level 4	GO:0008658	Molecular Function	2	3.8	penicillin binding
Level 4	GO:0000166	Molecular Function	4	7.7	nucleotide binding
Level 4	GO:0032553	Molecular Function	4	7.7	ribonucleotide binding
Level 4	GO:0043169	Molecular Function	5	9.6	cation binding
Level 4	GO:0043168	Molecular Function	7	13.5	anion binding
Level 4	GO:0043177	Molecular Function	2	3.8	organic acid binding
Level 4	GO:0048038	Molecular Function	1	1.9	quinone binding
Level 4	GO:1901682	Molecular Function	1	1.9	sulfur compound transmembrane transporter activity
Level 4	GO:0015318	Molecular Function	2	3.8	inorganic molecular entity transmembrane transporter activity
Level 4	GO:0015075	Molecular Function	2	3.8	ion transmembrane transporter activity
Level 4	GO:0022804	Molecular Function	3	5.8	active transmembrane transporter activity
Level 4	GO:0022803	Molecular Function	1	1.9	passive transmembrane transporter activity
Level 4	GO:0015562	Molecular Function	1	1.9	efflux transmembrane transporter activity
Level 4	GO:0022884	Molecular Function	1	1.9	macromolecule transmembrane transporter activity
Level 4	GO:0008320	Molecular Function	1	1.9	protein transmembrane transporter activity
Level 4	GO:0042887	Molecular Function	1	1.9	amide transmembrane transporter activity
Level 4	GO:0042546	Biological Process	2	3.8	cell wall biogenesis
Level 4	GO:0070589	Biological Process	1	1.9	cellular component macromolecule biosynthetic process
Level 4	GO:0044036	Biological Process	1	1.9	cell wall macromolecule metabolic process
Level 4	GO:0034641	Biological Process	15	28.8	cellular nitrogen compound metabolic process
Level 4	GO:0006139	Biological Process	6	11.5	nucleobase-containing compound metabolic process
Level 4	GO:0055086	Biological Process	2	3.8	nucleobase-containing small molecule metabolic process
Level 4	GO:0072338	Biological Process	1	1.9	cellular lactam metabolic process
Level 4	GO:0046483	Biological Process	9	17.3	heterocycle metabolic process
Level 4	GO:0017144	Biological Process	5	9.6	drug metabolic process
Level 4	GO:0006725	Biological Process	7	13.5	cellular aromatic compound metabolic process
Level 4	GO:0044260	Biological Process	13	25	cellular macromolecule metabolic process
Level 4	GO:0051186	Biological Process	2	3.8	cofactor metabolic process
Level 4	GO:0006793	Biological Process	5	9.6	phosphorus metabolic process
Level 4	GO:0019637	Biological Process	3	5.8	organophosphate metabolic process
Level 4	GO:0006091	Biological Process	1	1.9	generation of precursor metabolites and energy
Level 4	GO:0015980	Biological Process	1	1.9	energy derivation by oxidation of organic compounds
Level 4	GO:0022900	Biological Process	1	1.9	electron transport chain
Level 4	GO:0044248	Biological Process	2	3.8	cellular catabolic process
Level 4	GO:0006082	Biological Process	1	1.9	organic acid metabolic process
Level 4	GO:0044255	Biological Process	1	1.9	cellular lipid metabolic process
Level 4	GO:0031323	Biological Process	2	3.8	regulation of cellular metabolic process
Level 4	GO:0015979	Biological Process	1	1.9	photosynthesis
Level 4	GO:0009306	Biological Process	1	1.9	protein secretion
Level 4	GO:0044249	Biological Process	14	26.9	cellular biosynthetic process
Level 4	GO:1901564	Biological Process	22	42.3	organonitrogen compound metabolic process
Level 4	GO:0019538	Biological Process	15	28.8	protein metabolic process
Level 4	GO:0006520	Biological Process	1	1.9	cellular amino acid metabolic process
Level 4	GO:1901576	Biological Process	14	26.9	organic substance biosynthetic process
Level 4	GO:1901360	Biological Process	9	17.3	organic cyclic compound metabolic process
Level 4	GO:0043170	Biological Process	20	38.5	macromolecule metabolic process
Level 4	GO:0060255	Biological Process	2	3.8	regulation of macromolecule metabolic process
Level 4	GO:1901135	Biological Process	3	5.8	carbohydrate derivative metabolic process
Level 4	GO:0006629	Biological Process	1	1.9	lipid metabolic process
Level 4	GO:0005975	Biological Process	1	1.9	carbohydrate metabolic process
Level 4	GO:1901575	Biological Process	1	1.9	organic substance catabolic process
Level 4	GO:0051171	Biological Process	2	3.8	regulation of nitrogen compound metabolic process
Level 4	GO:0044283	Biological Process	3	5.8	small molecule biosynthetic process
Level 4	GO:0006766	Biological Process	2	3.8	vitamin metabolic process
Level 4	GO:0009889	Biological Process	2	3.8	regulation of biosynthetic process
Level 4	GO:0080090	Biological Process	2	3.8	regulation of primary metabolic process
Level 4	GO:0006810	Biological Process	11	21.2	transport
Level 4	GO:0046907	Biological Process	1	1.9	intracellular transport
Level 4	GO:0045184	Biological Process	3	5.8	establishment of protein localization
Level 4	GO:0051649	Biological Process	1	1.9	establishment of localization in cell
Level 4	GO:0008104	Biological Process	3	5.8	protein localization
Level 4	GO:0070727	Biological Process	1	1.9	cellular macromolecule localization
Level 4	GO:0046677	Biological Process	2	3.8	response to antibiotic
Level 4	GO:0042592	Biological Process	1	1.9	homeostatic process
Level 4	GO:0031647	Biological Process	1	1.9	regulation of protein stability
Level 5	GO:0044444	Cellular Component	7	13.5	cytoplasmic part
Level 5	GO:0005737	Cellular Component	7	13.5	cytoplasm
Level 5	GO:0009579	Cellular Component	1	1.9	thylakoid
Level 5	GO:0044436	Cellular Component	1	1.9	thylakoid part
Level 5	GO:0009527	Cellular Component	1	1.9	plastid outer membrane
Level 5	GO:0009274	Cellular Component	1	1.9	peptidoglycan-based cell wall
Level 5	GO:0009526	Cellular Component	1	1.9	plastid envelope
Level 5	GO:0015935	Cellular Component	1	1.9	small ribosomal subunit
Level 5	GO:0015934	Cellular Component	1	1.9	large ribosomal subunit
Level 5	GO:0009523	Cellular Component	1	1.9	photosystem II
Level 5	GO:0016818	Molecular Function	2	3.8	hydrolase activity, acting on acid anhydrides, in phosphorus-containing anhydrides
Level 5	GO:0008236	Molecular Function	3	5.8	serine-type peptidase activity
Level 5	GO:0016812	Molecular Function	2	3.8	hydrolase activity, acting on carbon-nitrogen (but not peptide) bonds, in cyclic amides
Level 5	GO:0016811	Molecular Function	1	1.9	hydrolase activity, acting on carbon-nitrogen (but not peptide) bonds, in linear amides
Level 5	GO:0016301	Molecular Function	4	7.7	kinase activity
Level 5	GO:0016773	Molecular Function	4	7.7	phosphotransferase activity, alcohol group as acceptor
Level 5	GO:0016779	Molecular Function	2	3.8	nucleotidyltransferase activity
Level 5	GO:0016763	Molecular Function	1	1.9	transferase activity, transferring pentosyl groups
Level 5	GO:0008168	Molecular Function	2	3.8	methyltransferase activity
Level 5	GO:0070011	Molecular Function	6	11.5	peptidase activity, acting on L-amino acid peptides
Level 5	GO:0016901	Molecular Function	1	1.9	oxidoreductase activity, acting on the CH-OH group of donors, quinone or similar compound as acceptor
Level 5	GO:0003954	Molecular Function	1	1.9	NADH dehydrogenase activity
Level 5	GO:0016655	Molecular Function	1	1.9	oxidoreductase activity, acting on NAD(P)H, quinone or similar compound as acceptor
Level 5	GO:0071771	Molecular Function	1	1.9	aldehyde decarbonylase activity
Level 5	GO:0016836	Molecular Function	1	1.9	hydro-lyase activity
Level 5	GO:0003723	Molecular Function	3	5.8	RNA binding
Level 5	GO:0003677	Molecular Function	2	3.8	DNA binding
Level 5	GO:0035639	Molecular Function	4	7.7	purine ribonucleoside triphosphate binding
Level 5	GO:0017076	Molecular Function	4	7.7	purine nucleotide binding
Level 5	GO:0046872	Molecular Function	5	9.6	metal ion binding
Level 5	GO:0042301	Molecular Function	1	1.9	phosphate ion binding
Level 5	GO:0031406	Molecular Function	2	3.8	carboxylic acid binding
Level 5	GO:0032555	Molecular Function	4	7.7	purine ribonucleotide binding
Level 5	GO:0015116	Molecular Function	1	1.9	sulfate transmembrane transporter activity
Level 5	GO:0015103	Molecular Function	1	1.9	inorganic anion transmembrane transporter activity
Level 5	GO:0022890	Molecular Function	1	1.9	inorganic cation transmembrane transporter activity
Level 5	GO:0008509	Molecular Function	1	1.9	anion transmembrane transporter activity
Level 5	GO:0008324	Molecular Function	1	1.9	cation transmembrane transporter activity
Level 5	GO:0015291	Molecular Function	2	3.8	secondary active transmembrane transporter activity
Level 5	GO:0015399	Molecular Function	1	1.9	primary active transmembrane transporter activity
Level 5	GO:0015267	Molecular Function	1	1.9	channel activity
Level 5	GO:0015450	Molecular Function	1	1.9	P-P-bond-hydrolysis-driven protein transmembrane transporter activity
Level 5	GO:1904680	Molecular Function	1	1.9	peptide transmembrane transporter activity
Level 5	GO:0009273	Biological Process	2	3.8	peptidoglycan-based cell wall biogenesis
Level 5	GO:0044038	Biological Process	1	1.9	cell wall macromolecule biosynthetic process
Level 5	GO:0044271	Biological Process	11	21.2	cellular nitrogen compound biosynthetic process
Level 5	GO:0034654	Biological Process	3	5.8	nucleobase-containing compound biosynthetic process
Level 5	GO:0019219	Biological Process	2	3.8	regulation of nucleobase-containing compound metabolic process
Level 5	GO:0072521	Biological Process	2	3.8	purine-containing compound metabolic process
Level 5	GO:0043603	Biological Process	7	13.5	cellular amide metabolic process
Level 5	GO:0006518	Biological Process	6	11.5	peptide metabolic process
Level 5	GO:0044106	Biological Process	1	1.9	cellular amine metabolic process
Level 5	GO:0030653	Biological Process	1	1.9	beta-lactam antibiotic metabolic process
Level 5	GO:0044270	Biological Process	1	1.9	cellular nitrogen compound catabolic process
Level 5	GO:0042726	Biological Process	1	1.9	flavin-containing compound metabolic process
Level 5	GO:0018130	Biological Process	5	9.6	heterocycle biosynthetic process
Level 5	GO:0033013	Biological Process	1	1.9	tetrapyrrole metabolic process
Level 5	GO:0009235	Biological Process	1	1.9	cobalamin metabolic process
Level 5	GO:0046700	Biological Process	1	1.9	heterocycle catabolic process
Level 5	GO:0006771	Biological Process	1	1.9	riboflavin metabolic process
Level 5	GO:0046034	Biological Process	1	1.9	ATP metabolic process
Level 5	GO:0006119	Biological Process	1	1.9	oxidative phosphorylation
Level 5	GO:0016999	Biological Process	2	3.8	antibiotic metabolic process
Level 5	GO:0017001	Biological Process	2	3.8	antibiotic catabolic process
Level 5	GO:0090304	Biological Process	4	7.7	nucleic acid metabolic process
Level 5	GO:0019438	Biological Process	4	7.7	aromatic compound biosynthetic process
Level 5	GO:0034645	Biological Process	9	17.3	cellular macromolecule biosynthetic process
Level 5	GO:0044267	Biological Process	9	17.3	cellular protein metabolic process
Level 5	GO:0006259	Biological Process	1	1.9	DNA metabolic process
Level 5	GO:0051188	Biological Process	2	3.8	cofactor biosynthetic process
Level 5	GO:0006732	Biological Process	1	1.9	coenzyme metabolic process
Level 5	GO:0006796	Biological Process	5	9.6	phosphate-containing compound metabolic process
Level 5	GO:0006753	Biological Process	2	3.8	nucleoside phosphate metabolic process
Level 5	GO:0019693	Biological Process	2	3.8	ribose phosphate metabolic process
Level 5	GO:0006644	Biological Process	1	1.9	phospholipid metabolic process
Level 5	GO:0090407	Biological Process	2	3.8	organophosphate biosynthetic process
Level 5	GO:0045333	Biological Process	1	1.9	cellular respiration
Level 5	GO:0022904	Biological Process	1	1.9	respiratory electron transport chain
Level 5	GO:0072340	Biological Process	1	1.9	cellular lactam catabolic process
Level 5	GO:0043436	Biological Process	1	1.9	oxoacid metabolic process
Level 5	GO:0016053	Biological Process	1	1.9	organic acid biosynthetic process
Level 5	GO:0009110	Biological Process	2	3.8	vitamin biosynthetic process
Level 5	GO:0008654	Biological Process	1	1.9	phospholipid biosynthetic process
Level 5	GO:0031326	Biological Process	2	3.8	regulation of cellular biosynthetic process
Level 5	GO:1901566	Biological Process	11	21.2	organonitrogen compound biosynthetic process
Level 5	GO:0008652	Biological Process	1	1.9	cellular amino acid biosynthetic process
Level 5	GO:0006022	Biological Process	1	1.9	aminoglycan metabolic process
Level 5	GO:0051604	Biological Process	1	1.9	protein maturation
Level 5	GO:0006508	Biological Process	7	13.5	proteolysis
Level 5	GO:0046451	Biological Process	1	1.9	diaminopimelate metabolic process
Level 5	GO:1901605	Biological Process	1	1.9	alpha-amino acid metabolic process
Level 5	GO:0009308	Biological Process	1	1.9	amine metabolic process
Level 5	GO:1901565	Biological Process	1	1.9	organonitrogen compound catabolic process
Level 5	GO:1901362	Biological Process	5	9.6	organic cyclic compound biosynthetic process
Level 5	GO:1901137	Biological Process	2	3.8	carbohydrate derivative biosynthetic process
Level 5	GO:0009059	Biological Process	9	17.3	macromolecule biosynthetic process
Level 5	GO:0010556	Biological Process	2	3.8	regulation of macromolecule biosynthetic process
Level 5	GO:0008610	Biological Process	1	1.9	lipid biosynthetic process
Level 5	GO:1901361	Biological Process	1	1.9	organic cyclic compound catabolic process
Level 5	GO:0043412	Biological Process	3	5.8	macromolecule modification
Level 5	GO:0036211	Biological Process	2	3.8	protein modification process
Level 5	GO:0010468	Biological Process	2	3.8	regulation of gene expression
Level 5	GO:0051252	Biological Process	2	3.8	regulation of RNA metabolic process
Level 5	GO:0010467	Biological Process	10	19.2	gene expression
Level 5	GO:0006767	Biological Process	2	3.8	water-soluble vitamin metabolic process
Level 5	GO:0071705	Biological Process	4	7.7	nitrogen compound transport
Level 5	GO:0071702	Biological Process	5	9.6	organic substance transport
Level 5	GO:0006811	Biological Process	3	5.8	ion transport
Level 5	GO:0072348	Biological Process	1	1.9	sulfur compound transport
Level 5	GO:0055085	Biological Process	5	9.6	transmembrane transport
Level 5	GO:0046903	Biological Process	1	1.9	secretion
Level 5	GO:0015031	Biological Process	3	5.8	protein transport
Level 5	GO:0034613	Biological Process	1	1.9	cellular protein localization
Level 5	GO:0006886	Biological Process	1	1.9	intracellular protein transport
Level 5	GO:0048878	Biological Process	1	1.9	chemical homeostasis
Level 5	GO:0050821	Biological Process	1	1.9	protein stabilization
Level 6	GO:0044435	Cellular Component	1	1.9	plastid part
Level 6	GO:0009941	Cellular Component	1	1.9	chloroplast envelope
Level 6	GO:0031969	Cellular Component	1	1.9	chloroplast membrane
Level 6	GO:0016462	Molecular Function	2	3.8	pyrophosphatase activity
Level 6	GO:0070008	Molecular Function	1	1.9	serine-type exopeptidase activity
Level 6	GO:0004252	Molecular Function	2	3.8	serine-type endopeptidase activity
Level 6	GO:0008800	Molecular Function	2	3.8	beta-lactamase activity
Level 6	GO:0042242	Molecular Function	1	1.9	cobyrinic acid a,c-diamide synthase activity
Level 6	GO:0004140	Molecular Function	1	1.9	dephospho-CoA kinase activity
Level 6	GO:0008531	Molecular Function	1	1.9	riboflavin kinase activity
Level 6	GO:0070567	Molecular Function	1	1.9	cytidylyltransferase activity
Level 6	GO:0070566	Molecular Function	1	1.9	adenylyltransferase activity
Level 6	GO:0008238	Molecular Function	2	3.8	exopeptidase activity
Level 6	GO:0004175	Molecular Function	4	7.7	endopeptidase activity
Level 6	GO:0008237	Molecular Function	3	5.8	metallopeptidase activity
Level 6	GO:0050136	Molecular Function	1	1.9	NADH dehydrogenase (quinone) activity
Level 6	GO:0008840	Molecular Function	1	1.9	4-hydroxy-tetrahydrodipicolinate synthase
Level 6	GO:0019843	Molecular Function	1	1.9	rRNA binding
Level 6	GO:0005509	Molecular Function	2	3.8	calcium ion binding
Level 6	GO:0046914	Molecular Function	2	3.8	transition metal ion binding
Level 6	GO:0033293	Molecular Function	2	3.8	monocarboxylic acid binding
Level 6	GO:0032559	Molecular Function	4	7.7	adenyl ribonucleotide binding
Level 6	GO:0008271	Molecular Function	1	1.9	secondary active sulfate transmembrane transporter activity
Level 6	GO:0015077	Molecular Function	1	1.9	monovalent inorganic cation transmembrane transporter activity
Level 6	GO:0015298	Molecular Function	1	1.9	solute:cation antiporter activity
Level 6	GO:0015297	Molecular Function	1	1.9	antiporter activity
Level 6	GO:0015405	Molecular Function	1	1.9	P-P-bond-hydrolysis-driven transmembrane transporter activity
Level 6	GO:0022829	Molecular Function	1	1.9	wide pore channel activity
Level 6	GO:0009252	Biological Process	1	1.9	peptidoglycan biosynthetic process
Level 6	GO:0033014	Biological Process	1	1.9	tetrapyrrole biosynthetic process
Level 6	GO:0043604	Biological Process	6	11.5	amide biosynthetic process
Level 6	GO:0072522	Biological Process	1	1.9	purine-containing compound biosynthetic process
Level 6	GO:0006163	Biological Process	2	3.8	purine nucleotide metabolic process
Level 6	GO:0034032	Biological Process	1	1.9	purine nucleoside bisphosphate metabolic process
Level 6	GO:0043605	Biological Process	1	1.9	cellular amide catabolic process
Level 6	GO:0042727	Biological Process	1	1.9	flavin-containing compound biosynthetic process
Level 6	GO:0009231	Biological Process	1	1.9	riboflavin biosynthetic process
Level 6	GO:0006351	Biological Process	2	3.8	transcription, DNA-templated
Level 6	GO:2000112	Biological Process	2	3.8	regulation of cellular macromolecule biosynthetic process
Level 6	GO:0006412	Biological Process	6	11.5	translation
Level 6	GO:0006464	Biological Process	2	3.8	cellular protein modification process
Level 6	GO:0080120	Biological Process	1	1.9	CAAX-box protein maturation
Level 6	GO:0006310	Biological Process	1	1.9	DNA recombination
Level 6	GO:0009236	Biological Process	1	1.9	cobalamin biosynthetic process
Level 6	GO:0009108	Biological Process	1	1.9	coenzyme biosynthetic process
Level 6	GO:0015936	Biological Process	1	1.9	coenzyme A metabolic process
Level 6	GO:0016310	Biological Process	3	5.8	phosphorylation
Level 6	GO:0042773	Biological Process	1	1.9	ATP synthesis coupled electron transport
Level 6	GO:0030655	Biological Process	1	1.9	beta-lactam antibiotic catabolic process
Level 6	GO:0019752	Biological Process	1	1.9	carboxylic acid metabolic process
Level 6	GO:0046394	Biological Process	1	1.9	carboxylic acid biosynthetic process
Level 6	GO:2001141	Biological Process	2	3.8	regulation of RNA biosynthetic process
Level 6	GO:0006023	Biological Process	1	1.9	aminoglycan biosynthetic process
Level 6	GO:0043043	Biological Process	6	11.5	peptide biosynthetic process
Level 6	GO:0030203	Biological Process	1	1.9	glycosaminoglycan metabolic process
Level 6	GO:0046390	Biological Process	1	1.9	ribose phosphate biosynthetic process
Level 6	GO:0032774	Biological Process	2	3.8	RNA biosynthetic process
Level 6	GO:1901293	Biological Process	1	1.9	nucleoside phosphate biosynthetic process
Level 6	GO:0016070	Biological Process	3	5.8	RNA metabolic process
Level 6	GO:0009451	Biological Process	1	1.9	RNA modification
Level 6	GO:0006396	Biological Process	1	1.9	RNA processing
Level 6	GO:0009259	Biological Process	2	3.8	ribonucleotide metabolic process
Level 6	GO:0042364	Biological Process	2	3.8	water-soluble vitamin biosynthetic process
Level 6	GO:0009123	Biological Process	1	1.9	nucleoside monophosphate metabolic process
Level 6	GO:0009117	Biological Process	2	3.8	nucleotide metabolic process
Level 6	GO:0033865	Biological Process	1	1.9	nucleoside bisphosphate metabolic process
Level 6	GO:0016485	Biological Process	1	1.9	protein processing
Level 6	GO:1901607	Biological Process	1	1.9	alpha-amino acid biosynthetic process
Level 6	GO:0019877	Biological Process	1	1.9	diaminopimelate biosynthetic process
Level 6	GO:0006355	Biological Process	2	3.8	regulation of transcription, DNA-templated
Level 6	GO:0042886	Biological Process	3	5.8	amide transport
Level 6	GO:0015846	Biological Process	1	1.9	polyamine transport
Level 6	GO:0015833	Biological Process	3	5.8	peptide transport
Level 6	GO:0008643	Biological Process	1	1.9	carbohydrate transport
Level 6	GO:0006812	Biological Process	2	3.8	cation transport
Level 6	GO:0006820	Biological Process	1	1.9	anion transport
Level 6	GO:0008272	Biological Process	1	1.9	sulfate transport
Level 6	GO:0002790	Biological Process	1	1.9	peptide secretion
Level 6	GO:0050801	Biological Process	1	1.9	ion homeostasis

## Sheet: Table S6B
Table S6B. GO annotation of down-regulated DEPs.
Level	GO_ID	GO term	gene number	(percentage)	term discription
Level 2	GO:0005623	Cellular Component	11	22	cell
Level 2	GO:0044464	Cellular Component	11	22	cell part
Level 2	GO:0032991	Cellular Component	6	12	protein-containing complex
Level 2	GO:0016020	Cellular Component	16	32	membrane
Level 2	GO:0044425	Cellular Component	12	24	membrane part
Level 2	GO:0003824	Molecular Function	32	64	catalytic activity
Level 2	GO:0005215	Molecular Function	10	20	transporter activity
Level 2	GO:0016209	Molecular Function	2	4	antioxidant activity
Level 2	GO:0005488	Molecular Function	28	56	binding
Level 2	GO:0004871	Molecular Function	5	10	obsolete signal transducer activity
Level 2	GO:0060089	Molecular Function	3	6	molecular transducer activity
Level 2	GO:0140110	Molecular Function	2	4	transcription regulator activity
Level 2	GO:0009987	Biological Process	22	44	cellular process
Level 2	GO:0008152	Biological Process	29	58	metabolic process
Level 2	GO:0022610	Biological Process	1	2	biological adhesion
Level 2	GO:0071840	Biological Process	1	2	cellular component organization or biogenesis
Level 2	GO:0050896	Biological Process	7	14	response to stimulus
Level 2	GO:0040011	Biological Process	3	6	locomotion
Level 2	GO:0006118	Biological Process	4	8	obsolete electron transport
Level 2	GO:0051179	Biological Process	9	18	localization
Level 2	GO:0023052	Biological Process	6	12	signaling
Level 2	GO:0050789	Biological Process	9	18	regulation of biological process
Level 2	GO:0065007	Biological Process	9	18	biological regulation
Level 3	GO:0005622	Cellular Component	7	14	intracellular
Level 3	GO:0044424	Cellular Component	6	12	intracellular part
Level 3	GO:0034357	Cellular Component	1	2	photosynthetic membrane
Level 3	GO:0009358	Cellular Component	1	2	polyphosphate kinase complex
Level 3	GO:0044459	Cellular Component	3	6	plasma membrane part
Level 3	GO:0005886	Cellular Component	3	6	plasma membrane
Level 3	GO:0071944	Cellular Component	3	6	cell periphery
Level 3	GO:1902494	Cellular Component	4	8	catalytic complex
Level 3	GO:0098796	Cellular Component	4	8	membrane protein complex
Level 3	GO:0098636	Cellular Component	1	2	protein complex involved in cell adhesion
Level 3	GO:0043235	Cellular Component	1	2	receptor complex
Level 3	GO:1990351	Cellular Component	2	4	transporter complex
Level 3	GO:0031224	Cellular Component	11	22	intrinsic component of membrane
Level 3	GO:0016787	Molecular Function	9	18	hydrolase activity
Level 3	GO:0016491	Molecular Function	8	16	oxidoreductase activity
Level 3	GO:0051920	Molecular Function	1	2	peroxiredoxin activity
Level 3	GO:0016853	Molecular Function	2	4	isomerase activity
Level 3	GO:0016740	Molecular Function	8	16	transferase activity
Level 3	GO:0140096	Molecular Function	4	8	catalytic activity, acting on a protein
Level 3	GO:0016874	Molecular Function	2	4	ligase activity
Level 3	GO:0016829	Molecular Function	1	2	lyase activity
Level 3	GO:0004133	Molecular Function	1	2	glycogen debranching enzyme activity
Level 3	GO:0022857	Molecular Function	9	18	transmembrane transporter activity
Level 3	GO:0043167	Molecular Function	17	34	ion binding
Level 3	GO:0048037	Molecular Function	5	10	cofactor binding
Level 3	GO:0036094	Molecular Function	7	14	small molecule binding
Level 3	GO:0097159	Molecular Function	11	22	organic cyclic compound binding
Level 3	GO:1901363	Molecular Function	11	22	heterocyclic compound binding
Level 3	GO:0005515	Molecular Function	5	10	protein binding
Level 3	GO:0051540	Molecular Function	2	4	metal cluster binding
Level 3	GO:0008144	Molecular Function	6	12	drug binding
Level 3	GO:0097367	Molecular Function	6	12	carbohydrate derivative binding
Level 3	GO:0000156	Molecular Function	2	4	phosphorelay response regulator activity
Level 3	GO:0038023	Molecular Function	1	2	signaling receptor activity
Level 3	GO:0043856	Molecular Function	2	4	anti-sigma factor antagonist activity
Level 3	GO:0007154	Biological Process	8	16	cell communication
Level 3	GO:0007165	Biological Process	6	12	signal transduction
Level 3	GO:0044237	Biological Process	16	32	cellular metabolic process
Level 3	GO:0050794	Biological Process	9	18	regulation of cellular process
Level 3	GO:0051716	Biological Process	6	12	cellular response to stimulus
Level 3	GO:0019725	Biological Process	1	2	cellular homeostasis
Level 3	GO:0071704	Biological Process	18	36	organic substance metabolic process
Level 3	GO:0044238	Biological Process	16	32	primary metabolic process
Level 3	GO:0006807	Biological Process	12	24	nitrogen compound metabolic process
Level 3	GO:0009058	Biological Process	12	24	biosynthetic process
Level 3	GO:0044281	Biological Process	7	14	small molecule metabolic process
Level 3	GO:0009056	Biological Process	4	8	catabolic process
Level 3	GO:0019222	Biological Process	4	8	regulation of metabolic process
Level 3	GO:0055114	Biological Process	7	14	oxidation-reduction process
Level 3	GO:0007155	Biological Process	1	2	cell adhesion
Level 3	GO:0044085	Biological Process	1	2	cellular component biogenesis
Level 3	GO:0009605	Biological Process	3	6	response to external stimulus
Level 3	GO:0042330	Biological Process	3	6	taxis
Level 3	GO:0042221	Biological Process	4	8	response to chemical
Level 3	GO:0051234	Biological Process	9	18	establishment of localization
Level 3	GO:0065008	Biological Process	1	2	regulation of biological quality
Level 4	GO:0005737	Cellular Component	5	10	cytoplasm
Level 4	GO:0044444	Cellular Component	1	2	cytoplasmic part
Level 4	GO:0009579	Cellular Component	1	2	thylakoid
Level 4	GO:0044436	Cellular Component	1	2	thylakoid part
Level 4	GO:0009521	Cellular Component	1	2	photosystem
Level 4	GO:1990234	Cellular Component	2	4	transferase complex
Level 4	GO:1904949	Cellular Component	2	4	ATPase complex
Level 4	GO:0098797	Cellular Component	3	6	plasma membrane protein complex
Level 4	GO:1902495	Cellular Component	2	4	transmembrane transporter complex
Level 4	GO:0008305	Cellular Component	1	2	integrin complex
Level 4	GO:0098802	Cellular Component	1	2	plasma membrane receptor complex
Level 4	GO:0031226	Cellular Component	1	2	intrinsic component of plasma membrane
Level 4	GO:0016021	Cellular Component	11	22	integral component of membrane
Level 4	GO:0016817	Molecular Function	3	6	hydrolase activity, acting on acid anhydrides
Level 4	GO:0008233	Molecular Function	1	2	peptidase activity
Level 4	GO:0016798	Molecular Function	1	2	hydrolase activity, acting on glycosyl bonds
Level 4	GO:0016788	Molecular Function	2	4	hydrolase activity, acting on ester bonds
Level 4	GO:0016684	Molecular Function	1	2	oxidoreductase activity, acting on peroxide as acceptor
Level 4	GO:0016627	Molecular Function	1	2	oxidoreductase activity, acting on the CH-CH group of donors
Level 4	GO:0016679	Molecular Function	1	2	oxidoreductase activity, acting on diphenols and related substances as donors
Level 4	GO:0009055	Molecular Function	3	6	electron transfer activity
Level 4	GO:0015002	Molecular Function	1	2	heme-copper terminal oxidase activity
Level 4	GO:0016675	Molecular Function	1	2	oxidoreductase activity, acting on a heme group of donors
Level 4	GO:0016866	Molecular Function	1	2	intramolecular transferase activity
Level 4	GO:0016860	Molecular Function	1	2	intramolecular oxidoreductase activity
Level 4	GO:0016772	Molecular Function	7	14	transferase activity, transferring phosphorus-containing groups
Level 4	GO:0004672	Molecular Function	2	4	protein kinase activity
Level 4	GO:0016746	Molecular Function	1	2	transferase activity, transferring acyl groups
Level 4	GO:0004721	Molecular Function	1	2	phosphoprotein phosphatase activity
Level 4	GO:0016879	Molecular Function	1	2	ligase activity, forming carbon-nitrogen bonds
Level 4	GO:0016877	Molecular Function	1	2	ligase activity, forming carbon-sulfur bonds
Level 4	GO:0016835	Molecular Function	1	2	carbon-oxygen lyase activity
Level 4	GO:0015075	Molecular Function	7	14	ion transmembrane transporter activity
Level 4	GO:0015318	Molecular Function	9	18	inorganic molecular entity transmembrane transporter activity
Level 4	GO:0022804	Molecular Function	7	14	active transmembrane transporter activity
Level 4	GO:0015238	Molecular Function	1	2	drug transmembrane transporter activity
Level 4	GO:0005342	Molecular Function	1	2	organic acid transmembrane transporter activity
Level 4	GO:0022803	Molecular Function	1	2	passive transmembrane transporter activity
Level 4	GO:0043169	Molecular Function	8	16	cation binding
Level 4	GO:0043168	Molecular Function	10	20	anion binding
Level 4	GO:0016168	Molecular Function	1	2	chlorophyll binding
Level 4	GO:0050662	Molecular Function	1	2	coenzyme binding
Level 4	GO:0051536	Molecular Function	2	4	iron-sulfur cluster binding
Level 4	GO:0020037	Molecular Function	1	2	heme binding
Level 4	GO:0000166	Molecular Function	7	14	nucleotide binding
Level 4	GO:0032553	Molecular Function	6	12	ribonucleotide binding
Level 4	GO:1901265	Molecular Function	7	14	nucleoside phosphate binding
Level 4	GO:0005524	Molecular Function	6	12	ATP binding
Level 4	GO:0046906	Molecular Function	2	4	tetrapyrrole binding
Level 4	GO:0003676	Molecular Function	2	4	nucleic acid binding
Level 4	GO:0045152	Molecular Function	2	4	antisigma factor binding
Level 4	GO:0004888	Molecular Function	1	2	transmembrane signaling receptor activity
Level 4	GO:0006793	Biological Process	7	14	phosphorus metabolic process
Level 4	GO:0019637	Biological Process	4	8	organophosphate metabolic process
Level 4	GO:0046483	Biological Process	9	18	heterocycle metabolic process
Level 4	GO:0006139	Biological Process	8	16	nucleobase-containing compound metabolic process
Level 4	GO:0055086	Biological Process	3	6	nucleobase-containing small molecule metabolic process
Level 4	GO:0034641	Biological Process	9	18	cellular nitrogen compound metabolic process
Level 4	GO:0006725	Biological Process	9	18	cellular aromatic compound metabolic process
Level 4	GO:0044249	Biological Process	10	20	cellular biosynthetic process
Level 4	GO:0017144	Biological Process	3	6	drug metabolic process
Level 4	GO:0006091	Biological Process	4	8	generation of precursor metabolites and energy
Level 4	GO:0015980	Biological Process	2	4	energy derivation by oxidation of organic compounds
Level 4	GO:0022900	Biological Process	1	2	electron transport chain
Level 4	GO:0015979	Biological Process	1	2	photosynthesis
Level 4	GO:0044248	Biological Process	3	6	cellular catabolic process
Level 4	GO:0051186	Biological Process	2	4	cofactor metabolic process
Level 4	GO:0006082	Biological Process	2	4	organic acid metabolic process
Level 4	GO:0044260	Biological Process	6	12	cellular macromolecule metabolic process
Level 4	GO:0031323	Biological Process	4	8	regulation of cellular metabolic process
Level 4	GO:0044262	Biological Process	1	2	cellular carbohydrate metabolic process
Level 4	GO:0045454	Biological Process	1	2	cell redox homeostasis
Level 4	GO:1901135	Biological Process	3	6	carbohydrate derivative metabolic process
Level 4	GO:1901360	Biological Process	9	18	organic cyclic compound metabolic process
Level 4	GO:1901576	Biological Process	9	18	organic substance biosynthetic process
Level 4	GO:1901564	Biological Process	6	12	organonitrogen compound metabolic process
Level 4	GO:0019538	Biological Process	3	6	protein metabolic process
Level 4	GO:0043170	Biological Process	8	16	macromolecule metabolic process
Level 4	GO:0060255	Biological Process	4	8	regulation of macromolecule metabolic process
Level 4	GO:0005975	Biological Process	7	14	carbohydrate metabolic process
Level 4	GO:1901575	Biological Process	4	8	organic substance catabolic process
Level 4	GO:1901615	Biological Process	1	2	organic hydroxy compound metabolic process
Level 4	GO:0006066	Biological Process	1	2	alcohol metabolic process
Level 4	GO:0005996	Biological Process	2	4	monosaccharide metabolic process
Level 4	GO:0080090	Biological Process	4	8	regulation of primary metabolic process
Level 4	GO:0051171	Biological Process	4	8	regulation of nitrogen compound metabolic process
Level 4	GO:0044283	Biological Process	4	8	small molecule biosynthetic process
Level 4	GO:0009889	Biological Process	4	8	regulation of biosynthetic process
Level 4	GO:0044282	Biological Process	1	2	small molecule catabolic process
Level 4	GO:0022613	Biological Process	1	2	ribonucleoprotein complex biogenesis
Level 4	GO:0006935	Biological Process	3	6	chemotaxis
Level 4	GO:0042493	Biological Process	1	2	response to drug
Level 4	GO:0006810	Biological Process	9	18	transport
Level 4	GO:0035556	Biological Process	2	4	intracellular signal transduction
Level 4	GO:0042592	Biological Process	1	2	homeostatic process
Level 5	GO:0005829	Cellular Component	1	2	cytosol
Level 5	GO:0044445	Cellular Component	1	2	cytosolic part
Level 5	GO:0061695	Cellular Component	2	4	transferase complex, transferring phosphorus-containing groups
Level 5	GO:0098533	Cellular Component	2	4	ATPase dependent transmembrane transport complex
Level 5	GO:0043190	Cellular Component	2	4	ATP-binding cassette (ABC) transporter complex
Level 5	GO:0005887	Cellular Component	1	2	integral component of plasma membrane
Level 5	GO:0016818	Molecular Function	3	6	hydrolase activity, acting on acid anhydrides, in phosphorus-containing anhydrides
Level 5	GO:0004553	Molecular Function	1	2	hydrolase activity, hydrolyzing O-glycosyl compounds
Level 5	GO:0004518	Molecular Function	1	2	nuclease activity
Level 5	GO:0042578	Molecular Function	1	2	phosphoric ester hydrolase activity
Level 5	GO:0016635	Molecular Function	1	2	oxidoreductase activity, acting on the CH-CH group of donors, quinone or related compound as acceptor
Level 5	GO:0016681	Molecular Function	1	2	oxidoreductase activity, acting on diphenols and related substances as donors, cytochrome as acceptor
Level 5	GO:0008121	Molecular Function	1	2	ubiquinol-cytochrome-c reductase activity
Level 5	GO:0004129	Molecular Function	1	2	cytochrome-c oxidase activity
Level 5	GO:0016676	Molecular Function	1	2	oxidoreductase activity, acting on a heme group of donors, oxygen as acceptor
Level 5	GO:0016868	Molecular Function	1	2	intramolecular transferase activity, phosphotransferases
Level 5	GO:0016861	Molecular Function	1	2	intramolecular oxidoreductase activity, interconverting aldoses and ketoses
Level 5	GO:0016773	Molecular Function	5	10	phosphotransferase activity, alcohol group as acceptor
Level 5	GO:0016301	Molecular Function	5	10	kinase activity
Level 5	GO:0016775	Molecular Function	2	4	phosphotransferase activity, nitrogenous group as acceptor
Level 5	GO:0004673	Molecular Function	2	4	protein histidine kinase activity
Level 5	GO:0016779	Molecular Function	1	2	nucleotidyltransferase activity
Level 5	GO:0016776	Molecular Function	1	2	phosphotransferase activity, phosphate group as acceptor
Level 5	GO:0016747	Molecular Function	1	2	transferase activity, transferring acyl groups other than amino-acyl groups
Level 5	GO:0070011	Molecular Function	1	2	peptidase activity, acting on L-amino acid peptides
Level 5	GO:0016880	Molecular Function	1	2	acid-ammonia (or amide) ligase activity
Level 5	GO:0008641	Molecular Function	1	2	ubiquitin-like modifier activating enzyme activity
Level 5	GO:0016836	Molecular Function	1	2	hydro-lyase activity
Level 5	GO:0008509	Molecular Function	5	10	anion transmembrane transporter activity
Level 5	GO:0015103	Molecular Function	5	10	inorganic anion transmembrane transporter activity
Level 5	GO:0022853	Molecular Function	1	2	active ion transmembrane transporter activity
Level 5	GO:0008324	Molecular Function	2	4	cation transmembrane transporter activity
Level 5	GO:0022890	Molecular Function	2	4	inorganic cation transmembrane transporter activity
Level 5	GO:0005216	Molecular Function	1	2	ion channel activity
Level 5	GO:0005315	Molecular Function	6	12	inorganic phosphate transmembrane transporter activity
Level 5	GO:0046943	Molecular Function	1	2	carboxylic acid transmembrane transporter activity
Level 5	GO:0015399	Molecular Function	3	6	primary active transmembrane transporter activity
Level 5	GO:0015291	Molecular Function	6	12	secondary active transmembrane transporter activity
Level 5	GO:0042895	Molecular Function	1	2	antibiotic transmembrane transporter activity
Level 5	GO:0015267	Molecular Function	1	2	channel activity
Level 5	GO:0046872	Molecular Function	7	14	metal ion binding
Level 5	GO:0042301	Molecular Function	3	6	phosphate ion binding
Level 5	GO:0035639	Molecular Function	6	12	purine ribonucleoside triphosphate binding
Level 5	GO:0051287	Molecular Function	1	2	NAD binding
Level 5	GO:0051537	Molecular Function	2	4	2 iron, 2 sulfur cluster binding
Level 5	GO:0017076	Molecular Function	6	12	purine nucleotide binding
Level 5	GO:0032555	Molecular Function	6	12	purine ribonucleotide binding
Level 5	GO:0003677	Molecular Function	1	2	DNA binding
Level 5	GO:0006002	Biological Process	1	2	fructose 6-phosphate metabolic process
Level 5	GO:0006753	Biological Process	3	6	nucleoside phosphate metabolic process
Level 5	GO:0019693	Biological Process	2	4	ribose phosphate metabolic process
Level 5	GO:0090407	Biological Process	2	4	organophosphate biosynthetic process
Level 5	GO:0052646	Biological Process	1	2	alditol phosphate metabolic process
Level 5	GO:0046434	Biological Process	2	4	organophosphate catabolic process
Level 5	GO:0006796	Biological Process	6	12	phosphate-containing compound metabolic process
Level 5	GO:0006797	Biological Process	1	2	polyphosphate metabolic process
Level 5	GO:0006799	Biological Process	1	2	polyphosphate biosynthetic process
Level 5	GO:0034654	Biological Process	7	14	nucleobase-containing compound biosynthetic process
Level 5	GO:0090304	Biological Process	5	10	nucleic acid metabolic process
Level 5	GO:0034655	Biological Process	2	4	nucleobase-containing compound catabolic process
Level 5	GO:0019219	Biological Process	4	8	regulation of nucleobase-containing compound metabolic process
Level 5	GO:0018130	Biological Process	8	16	heterocycle biosynthetic process
Level 5	GO:0072527	Biological Process	1	2	pyrimidine-containing compound metabolic process
Level 5	GO:0046700	Biological Process	2	4	heterocycle catabolic process
Level 5	GO:0072521	Biological Process	1	2	purine-containing compound metabolic process
Level 5	GO:0072524	Biological Process	1	2	pyridine-containing compound metabolic process
Level 5	GO:0042558	Biological Process	1	2	pteridine-containing compound metabolic process
Level 5	GO:0044271	Biological Process	8	16	cellular nitrogen compound biosynthetic process
Level 5	GO:0044270	Biological Process	2	4	cellular nitrogen compound catabolic process
Level 5	GO:0019438	Biological Process	8	16	aromatic compound biosynthetic process
Level 5	GO:0019439	Biological Process	2	4	aromatic compound catabolic process
Level 5	GO:0046146	Biological Process	1	2	tetrahydrobiopterin metabolic process
Level 5	GO:0017000	Biological Process	1	2	antibiotic biosynthetic process
Level 5	GO:0016053	Biological Process	1	2	organic acid biosynthetic process
Level 5	GO:0051188	Biological Process	2	4	cofactor biosynthetic process
Level 5	GO:0031326	Biological Process	4	8	regulation of cellular biosynthetic process
Level 5	GO:0034645	Biological Process	4	8	cellular macromolecule biosynthetic process
Level 5	GO:0016999	Biological Process	1	2	antibiotic metabolic process
Level 5	GO:0046034	Biological Process	1	2	ATP metabolic process
Level 5	GO:0006757	Biological Process	1	2	ATP generation from ADP
Level 5	GO:0019684	Biological Process	1	2	photosynthesis, light reaction
Level 5	GO:0009767	Biological Process	1	2	photosynthetic electron transport chain
Level 5	GO:0006112	Biological Process	1	2	energy reserve metabolic process
Level 5	GO:0045333	Biological Process	1	2	cellular respiration
Level 5	GO:0044275	Biological Process	1	2	cellular carbohydrate catabolic process
Level 5	GO:0006732	Biological Process	2	4	coenzyme metabolic process
Level 5	GO:0044264	Biological Process	1	2	cellular polysaccharide metabolic process
Level 5	GO:0044267	Biological Process	2	4	cellular protein metabolic process
Level 5	GO:0051252	Biological Process	4	8	regulation of RNA metabolic process
Level 5	GO:1901137	Biological Process	2	4	carbohydrate derivative biosynthetic process
Level 5	GO:1901657	Biological Process	1	2	glycosyl compound metabolic process
Level 5	GO:0009116	Biological Process	1	2	nucleoside metabolic process
Level 5	GO:1901362	Biological Process	8	16	organic cyclic compound biosynthetic process
Level 5	GO:1901361	Biological Process	2	4	organic cyclic compound catabolic process
Level 5	GO:1901566	Biological Process	3	6	organonitrogen compound biosynthetic process
Level 5	GO:0009059	Biological Process	4	8	macromolecule biosynthetic process
Level 5	GO:0010556	Biological Process	4	8	regulation of macromolecule biosynthetic process
Level 5	GO:1901617	Biological Process	1	2	organic hydroxy compound biosynthetic process
Level 5	GO:0046165	Biological Process	1	2	alcohol biosynthetic process
Level 5	GO:0009112	Biological Process	1	2	nucleobase metabolic process
Level 5	GO:0036211	Biological Process	2	4	protein modification process
Level 5	GO:0010467	Biological Process	5	10	gene expression
Level 5	GO:0010468	Biological Process	4	8	regulation of gene expression
Level 5	GO:0005976	Biological Process	1	2	polysaccharide metabolic process
Level 5	GO:0009057	Biological Process	1	2	macromolecule catabolic process
Level 5	GO:0043412	Biological Process	2	4	macromolecule modification
Level 5	GO:0016052	Biological Process	3	6	carbohydrate catabolic process
Level 5	GO:0034404	Biological Process	3	6	nucleobase-containing small molecule biosynthetic process
Level 5	GO:0046365	Biological Process	1	2	monosaccharide catabolic process
Level 5	GO:0019318	Biological Process	2	4	hexose metabolic process
Level 5	GO:0006508	Biological Process	1	2	proteolysis
Level 5	GO:0043436	Biological Process	2	4	oxoacid metabolic process
Level 5	GO:0019751	Biological Process	1	2	polyol metabolic process
Level 5	GO:0042254	Biological Process	1	2	ribosome biogenesis
Level 5	GO:0015893	Biological Process	1	2	drug transport
Level 5	GO:0006811	Biological Process	8	16	ion transport
Level 5	GO:0071702	Biological Process	1	2	organic substance transport
Level 5	GO:0055085	Biological Process	7	14	transmembrane transport
Level 5	GO:0000160	Biological Process	2	4	phosphorelay signal transduction system
Level 6	GO:0005945	Cellular Component	1	2	6-phosphofructokinase complex
Level 6	GO:0016462	Molecular Function	3	6	pyrophosphatase activity
Level 6	GO:0004519	Molecular Function	1	2	endonuclease activity
Level 6	GO:0016791	Molecular Function	1	2	phosphatase activity
Level 6	GO:0004152	Molecular Function	1	2	dihydroorotate dehydrogenase activity
Level 6	GO:0004619	Molecular Function	1	2	phosphoglycerate mutase activity
Level 6	GO:0004476	Molecular Function	1	2	mannose-6-phosphate isomerase activity
Level 6	GO:0008443	Molecular Function	1	2	phosphofructokinase activity
Level 6	GO:0004370	Molecular Function	1	2	glycerol kinase activity
Level 6	GO:0019200	Molecular Function	1	2	carbohydrate kinase activity
Level 6	GO:0008976	Molecular Function	1	2	polyphosphate kinase activity
Level 6	GO:0070567	Molecular Function	1	2	cytidylyltransferase activity
Level 6	GO:0016407	Molecular Function	1	2	acetyltransferase activity
Level 6	GO:0016410	Molecular Function	1	2	N-acyltransferase activity
Level 6	GO:0008234	Molecular Function	1	2	cysteine-type peptidase activity
Level 6	GO:0004175	Molecular Function	1	2	endopeptidase activity
Level 6	GO:0000155	Molecular Function	2	4	phosphorelay sensor kinase activity
Level 6	GO:0016211	Molecular Function	1	2	ammonia ligase activity
Level 6	GO:0008124	Molecular Function	1	2	4-alpha-hydroxytetrahydrobiopterin dehydratase activity
Level 6	GO:0008514	Molecular Function	1	2	organic anion transmembrane transporter activity
Level 6	GO:0005261	Molecular Function	1	2	cation channel activity
Level 6	GO:0015114	Molecular Function	4	8	phosphate ion transmembrane transporter activity
Level 6	GO:0015105	Molecular Function	1	2	arsenite transmembrane transporter activity
Level 6	GO:0043225	Molecular Function	2	4	ATPase-coupled anion transmembrane transporter activity
Level 6	GO:0019829	Molecular Function	1	2	cation-transporting ATPase activity
Level 6	GO:0046873	Molecular Function	1	2	metal ion transmembrane transporter activity
Level 6	GO:0015077	Molecular Function	1	2	monovalent inorganic cation transmembrane transporter activity
Level 6	GO:0015142	Molecular Function	1	2	tricarboxylic acid transmembrane transporter activity
Level 6	GO:0042625	Molecular Function	1	2	ATPase coupled ion transmembrane transporter activity
Level 6	GO:0015405	Molecular Function	3	6	P-P-bond-hydrolysis-driven transmembrane transporter activity
Level 6	GO:0015137	Molecular Function	1	2	citrate transmembrane transporter activity
Level 6	GO:0022838	Molecular Function	1	2	substrate-specific channel activity
Level 6	GO:0046914	Molecular Function	3	6	transition metal ion binding
Level 6	GO:0005509	Molecular Function	3	6	calcium ion binding
Level 6	GO:0030554	Molecular Function	6	12	adenyl nucleotide binding
Level 6	GO:0032559	Molecular Function	6	12	adenyl ribonucleotide binding
Level 6	GO:0016310	Biological Process	3	6	phosphorylation
Level 6	GO:0072528	Biological Process	1	2	pyrimidine-containing compound biosynthetic process
Level 6	GO:0072525	Biological Process	1	2	pyridine-containing compound biosynthetic process
Level 6	GO:0072522	Biological Process	1	2	purine-containing compound biosynthetic process
Level 6	GO:0046112	Biological Process	1	2	nucleobase biosynthetic process
Level 6	GO:0042559	Biological Process	1	2	pteridine-containing compound biosynthetic process
Level 6	GO:0006206	Biological Process	1	2	pyrimidine nucleobase metabolic process
Level 6	GO:0019362	Biological Process	1	2	pyridine nucleotide metabolic process
Level 6	GO:0006220	Biological Process	1	2	pyrimidine nucleotide metabolic process
Level 6	GO:0006213	Biological Process	1	2	pyrimidine nucleoside metabolic process
Level 6	GO:0009108	Biological Process	2	4	coenzyme biosynthetic process
Level 6	GO:2001141	Biological Process	4	8	regulation of RNA biosynthetic process
Level 6	GO:2000112	Biological Process	4	8	regulation of cellular macromolecule biosynthetic process
Level 6	GO:0006754	Biological Process	1	2	ATP biosynthetic process
Level 6	GO:0006729	Biological Process	1	2	tetrahydrobiopterin biosynthetic process
Level 6	GO:0006096	Biological Process	1	2	glycolytic process
Level 6	GO:0044247	Biological Process	1	2	cellular polysaccharide catabolic process
Level 6	GO:0006733	Biological Process	1	2	oxidoreduction coenzyme metabolic process
Level 6	GO:0006351	Biological Process	4	8	transcription, DNA-templated
Level 6	GO:0006464	Biological Process	2	4	cellular protein modification process
Level 6	GO:1901293	Biological Process	2	4	nucleoside phosphate biosynthetic process
Level 6	GO:0009117	Biological Process	3	6	nucleotide metabolic process
Level 6	GO:0009123	Biological Process	2	4	nucleoside monophosphate metabolic process
Level 6	GO:1901292	Biological Process	2	4	nucleoside phosphate catabolic process
Level 6	GO:0009141	Biological Process	1	2	nucleoside triphosphate metabolic process
Level 6	GO:0009132	Biological Process	1	2	nucleoside diphosphate metabolic process
Level 6	GO:0046390	Biological Process	2	4	ribose phosphate biosynthetic process
Level 6	GO:0009259	Biological Process	2	4	ribonucleotide metabolic process
Level 6	GO:0006072	Biological Process	1	2	glycerol-3-phosphate metabolic process
Level 6	GO:1901659	Biological Process	1	2	glycosyl compound biosynthetic process
Level 6	GO:0032774	Biological Process	4	8	RNA biosynthetic process
Level 6	GO:0009163	Biological Process	1	2	nucleoside biosynthetic process
Level 6	GO:0006163	Biological Process	1	2	purine nucleotide metabolic process
Level 6	GO:0006396	Biological Process	1	2	RNA processing
Level 6	GO:0000272	Biological Process	1	2	polysaccharide catabolic process
Level 6	GO:0044042	Biological Process	1	2	glucan metabolic process
Level 6	GO:0016070	Biological Process	5	10	RNA metabolic process
Level 6	GO:0009119	Biological Process	1	2	ribonucleoside metabolic process
Level 6	GO:0046173	Biological Process	1	2	polyol biosynthetic process
Level 6	GO:0019320	Biological Process	1	2	hexose catabolic process
Level 6	GO:0006006	Biological Process	1	2	glucose metabolic process
Level 6	GO:0006013	Biological Process	1	2	mannose metabolic process
Level 6	GO:0046394	Biological Process	1	2	carboxylic acid biosynthetic process
Level 6	GO:0019752	Biological Process	1	2	carboxylic acid metabolic process
Level 6	GO:0034311	Biological Process	1	2	diol metabolic process
Level 6	GO:0006355	Biological Process	4	8	regulation of transcription, DNA-templated
Level 6	GO:0009060	Biological Process	1	2	aerobic respiration
Level 6	GO:0006364	Biological Process	1	2	rRNA processing
Level 6	GO:0006812	Biological Process	1	2	cation transport
Level 6	GO:0006820	Biological Process	7	14	anion transport
Level 6	GO:0034220	Biological Process	4	8	ion transmembrane transport
Level 6	GO:0042891	Biological Process	1	2	antibiotic transport
Level 6	GO:0015849	Biological Process	1	2	organic acid transport
Level 6	GO:0015711	Biological Process	1	2	organic anion transport
