# Supplementary material for: Proteomic analysis of the regulatory networks of ClpX in a model cyanobacterium Synechocystis sp. PCC 6803
Source: Front Plant Sci. 2022 Sep 29;13:994056. doi: 10.3389/fpls.2022.994056 (PMC9560874; doi:10.3389/fpls.2022.994056)
Supplement: Supplementary file 8 [file Table_7.xlsx]

## Sheet: Table S7A
Table S7A. Subcellular localization of up-regulated DEPs in Synechocystis sp. PCC 6803
Category	Protein ID	Protein description	Ratio	Regulated Type	P value
Unknown	slr0121	hypothetical protein	1.26925	Up	0.0128203
Unknown	sll1483	periplasmic protein, similar to transforming growth factor induced protein	1.30598	Up	0.0247471
Unknown	ssl6092	unknown protein	1.43361	Up	0.00300116
Unknown	slr0366	unknown protein	1.21849	Up	0.0110209
Unknown	slr1474	hypothetical protein	1.23901	Up	0.0370081
Unknown	sll7067	unknown protein	1.23778	Up	0.000381994
Unknown	slr1608	putative glucose dehydrogenase-B, periplasmic protein	1.43691	Up	0.000351629
Unknown	sll1002	hypothetical protein YCF22	1.22459	Up	0.0018251
Unknown	sll1068	unknown protein	1.25936	Up	0.00286418
Unknown	sll7063	unknown protein	1.35908	Up	0.00206125
Unknown	sll1949	unknown protein	1.46734	Up	0.00105074
Unknown	ssl1426	s50S ribosomal protein L35	1.34871	Up	0.00372151
Unknown	slr1272	probable porin; major outer membrane protein	1.58459	Up	6.05e-06
Unknown	sll1096	30S ribosomal protein S12	1.31906	Up	0.0189003
Unknown	slr1870	hypothetical protein	1.21071	Up	0.0145055
Unknown	sll0328	unknown protein	1.36411	Up	0.00134806
Unknown	sll7070	unknown protein	1.30053	Up	0.0397902
Unknown	sll0031	hypothetical protein	1.23967	Up	0.000288597
Unknown	slr0294	unknown protein	1.48135	Up	0.0143184
Unknown	sll7090	unknown protein	1.26662	Up	0.000187022
Unknown	sml0007	sml0007 photosystem II protein Y	2.29539	Up	0.000110615
Unknown	slr1512	sodium-dependent bicarbonate transporter	1.24406	Up	0.0299289
Unknown	sll0767	50S ribosomal protein L20	1.45848	Up	0.000737967
Unknown	ssl6035	sunknown protein	1.58813	Up	0.00946041
Unknown	ssl2100	sunknown protein	1.36445	Up	0.0276701
Unknown	slr1331	periplasmic processing protease	1.25894	Up	0.00274974
Unknown	ssr5106	hypothetical protein	1.62054	Up	0.00455797
Unknown	sll1378	periplasmic protein, function unknown	1.81874	Up	9.24e-05
Unknown	sll0449	unknown protein	1.24779	Up	3.55e-05
Unknown	sll7087	unknown protein	1.27431	Up	0.000149997
Unknown	slr0319	beta-lactamase	1.43094	Up	0.0064979
Unknown	sll0517	putative RNA binding protein	1.25672	Up	0.00853108
Unknown	sll1280	hypothetical protein	1.43419	Up	5.97e-05
Unknown	slr0514	unknown protein	1.20978	Up	0.0106962
Unknown	slr0364	hypothetical protein	1.3383	Up	0.00177759
Unknown	sll7064	unknown protein	1.26154	Up	0.00431756
Unknown	sll0448	unknown protein	1.26044	Up	0.0216728
Unknown	slr0793	cation efflux system protein involved in nickel and cobalt tolerance	2.23347	Up	0.0114542
Unknown	slr0601	unknown protein	1.29125	Up	0.00953232
Unknown	ssr1951	hypothetical protein	1.20343	Up	0.0165022
Unknown	smr0011	smr0011 50S ribosomal protein L34	1.67694	Up	0.000170423
Unknown	slr1956	unknown protein	1.33785	Up	0.00737778
Unknown	sll7065	unknown protein	1.21232	Up	0.0154927
Unknown	ssr5117	hypothetical protein	1.2318	Up	0.0226837
Unknown	sll0471	hypothetical protein	1.23549	Up	0.0319783
Unknown	ssl3127	similar to permease protein of ABC transporter;Integral membrane protein of the ABC-type, Nat permease for neutral amino acids	1.301	Up	0.0232663
Unknown	sll1598	Mn transporter MntC	1.27496	Up	0.0206485
Unknown	slr5111	unknown protein	1.58316	Up	0.00159399
Unknown	slr1753	hypothetical protein	1.22936	Up	0.00150319
Unknown	sll1885	unknown protein	1.36532	Up	0.000252241
Unknown	slr0420	hypothetical protein	1.21862	Up	0.00223254
Unknown	slr1270	periplasmic protein, function unknown	1.28294	Up	0.00683402
Unknown	slr0552	hypothetical protein	1.35738	Up	5.61e-05
Unknown	sll7086	unknown protein	1.36	Up	0.000408572
Unknown	slr1160	periplasmic protein, function unknown	1.222	Up	0.000133485
Unknown	sll7089	unknown protein	1.47611	Up	0.000583576
Unknown	sll7085	unknown protein	1.33493	Up	0.000212877
Unknown	sll7066	unknown protein	1.21633	Up	0.02294
Unknown	sll0319	periplasmic protein, function unknown	1.29452	Up	0.0034437
Unknown	slr7013	hypothetical protein	1.26281	Up	0.0258505
Unknown	slr0937	unknown protein	1.2251	Up	0.0231603
Unknown	sll0763	hypothetical protein	1.36087	Up	0.000919031
Unknown	slr0770	hypothetical protein	1.24449	Up	0.0154643
CytoplasmicMembrane	ssr1789	CAB/ELIP/HLIP-related protein HliD	1.4403	Up	0.00162228
CytoplasmicMembrane	slr1774	unknown protein	1.27172	Up	0.000220414
CytoplasmicMembrane	slr1369	phosphatidate cytidylyltransferase	1.23817	Up	0.00233829
CytoplasmicMembrane	sll1678	similar to spore maturation protein A	1.3139	Up	0.00923671
CytoplasmicMembrane	slr1350	acyl-lipid desaturase (delta 12)	1.2773	Up	0.0380647
CytoplasmicMembrane	sll1736	hypothetical protein	1.23063	Up	0.0236009
CytoplasmicMembrane	slr1186	hypothetical protein	1.27175	Up	0.0106185
CytoplasmicMembrane	ssr1386	NADH dehydrogenase subunit NdhL	1.27007	Up	0.0235961
CytoplasmicMembrane	sll0005	hypothetical protein	1.35933	Up	0.00573425
CytoplasmicMembrane	sll0223	NADH dehydrogenase subunit 2	1.2651	Up	0.00446369
CytoplasmicMembrane	slr0582	unknown protein	1.2062	Up	0.0257789
CytoplasmicMembrane	sll1350	hypothetical protein	1.2987	Up	0.00653495
CytoplasmicMembrane	smr0005	photosystem I subunit XII	1.8051	Up	0.0070887
CytoplasmicMembrane	sll0141	hypothetical protein	1.33795	Up	0.000802427
CytoplasmicMembrane	ssl2598	sphotosystem II PsbH protein	2.13086	Up	0.00129455
CytoplasmicMembrane	sll1606	hypothetical protein	1.37592	Up	0.0130159
CytoplasmicMembrane	sll0932	hypothetical protein	1.25454	Up	0.00365233
CytoplasmicMembrane	sll0689	Na+/H+ antiporter	1.228	Up	0.000538255
CytoplasmicMembrane	slr0327	iron(III) ABC transporter, permease protein	1.28356	Up	0.027728
CytoplasmicMembrane	ssl2615	sATP synthase C chain of CF(0)	1.26488	Up	0.0383206
CytoplasmicMembrane	slr1919	hypothetical protein	1.32485	Up	0.00474564
CytoplasmicMembrane	sll1006	unknown protein	1.25977	Up	9.91e-05
CytoplasmicMembrane	sll0002	penicillin-binding protein	1.22988	Up	0.0233249
CytoplasmicMembrane	ssr2087	hypothetical protein	1.29665	Up	0.0127388
CytoplasmicMembrane	sll0522	NADH dehydrogenase subunit 4L	1.77588	Up	0.000531271
CytoplasmicMembrane	smr0007	photosystem II PsbL protein	2.09804	Up	6.82e-05
CytoplasmicMembrane	sll0834	low affinity sulfate transporter	1.24753	Up	0.00190778
Cytoplasmic	slr0550	dihydrodipicolinate synthase	1.33597	Up	0.0101986
Cytoplasmic	slr6075	unknown protein;unknown protein	1.27641	Up	0.00011767
Cytoplasmic	sll0533	trigger factor	1.3008	Up	0.00133717
Cytoplasmic	sll0208	hypothetical protein	1.22467	Up	0.0085076
Cytoplasmic	sll1461	hypothetical protein	1.24552	Up	0.00807958
Cytoplasmic	slr1882	riboflavin biosynthesis protein RibF	1.21063	Up	0.0322916
Cytoplasmic	sll0555	methionine aminopeptidase	1.24059	Up	0.0121005
Cytoplasmic	slr6074	unknown protein;unknown protein	1.38681	Up	0.00029997
Cytoplasmic	sll0777	putative carboxypeptidase	1.38354	Up	0.002933
Cytoplasmic	slr1788	unknown protein	1.30346	Up	0.000122909
Cytoplasmic	slr0105	hypothetical protein	1.23155	Up	0.000901095
Cytoplasmic	slr0553	hypothetical protein	1.25944	Up	0.00112341
Cytoplasmic	slr6071	unknown protein;unknown protein	1.40204	Up	0.000383324
Cytoplasmic	sll1882	unknown protein	1.28147	Up	0.0414477
Cytoplasmic	slr0955	probable tRNA/rRNA methyltransferase	1.50199	Up	6.52e-05
Cytoplasmic	sll0743	hypothetical protein	1.23287	Up	0.0192896
Cytoplasmic	slr0869	hypothetical protein	1.23568	Up	0.000413031
Cytoplasmic	slr6073	unknown protein;unknown protein	1.29685	Up	0.00618176
Cytoplasmic	sll5069	unknown protein	1.20186	Up	0.0278921
Cytoplasmic	sll1817	30S ribosomal protein S11	1.27845	Up	0.0124393
Cytoplasmic	sll1802	50S ribosomal protein L2	1.22687	Up	0.00476438
Cytoplasmic	sll1807	50S ribosomal protein L24	1.76663	Up	0.000260519
Cytoplasmic	slr1564	group 3 RNA polymerase sigma factor	1.28199	Up	0.00607912
Periplasmic	sll1679	periplasmic protease HhoA	1.23629	Up	0.00196102
Periplasmic	slr0401	periplasmic polyamine-binding protein of ABC transporter	1.21714	Up	3.1e-05
Periplasmic	slr0646	probable D-alanyl-D-alanine carboxypeptidase	1.44099	Up	3.24e-05
Periplasmic	sll0224	amino-acid ABC transporter binding protein	1.20183	Up	0.000749578
Periplasmic	slr1415	hypothetical protein	1.27457	Up	0.0103551
Periplasmic	slr1204	protease	1.26635	Up	0.0035955
OuterMembrane	slr1841	probable porin; major outer membrane protein	1.3748	Up	2.05e-05
OuterMembrane	sll1406	ferrichrome-iron receptor	1.34551	Up	0.00334137
OuterMembrane	slr1661	hypothetical protein	1.33317	Up	0.0158527
OuterMembrane	slr1227	chloroplastic outer envelope membrane protein homolog	1.50898	Up	1.79e-05
other | Extracellular	slr1485	putative phosphatidylinositol phosphate kinase, salt-induced periplasmic protein	1.39325	Up	0.00133233
other | Extracellular	sll1009	unknown protein	2.41048	Up	0.000215145

## Sheet: Table S7B
Table S7B. Subcellular localization of down-regulated DEPs in Synechocystis sp. PCC 6803
Category	Protein ID	Protein description	Ratio	Regulated Type	P value																									Peptide counts (all)	Peptide counts (razor+unique)	Peptide counts (unique)	Number of proteins	Peptides	Razor + unique peptides	Unique peptides	Sequence coverage [%]	Unique + razor sequence coverage [%]	Unique sequence coverage [%]	Mol. weight [kDa]	Sequence length	Log_WT-1	Log_WT-2	Log_WT-3	Average_WT	Log_ClpX-1	Log_ClpX-2	Log_ClpX-3	Average_ClpX
Unknown	sll1785	periplasmic protein, function unknown	0.822347	Down	0.0037748																									11	11	11	1	11	11	11	50.7	50.7	50.7	30.011	268	19.5001	19.3945	19.4373	19.444	19.2039	19.1879	19.0935	19.1618
Unknown	sll5075	hypothetical protein	0.831144	Down	0.0302671																									3	3	3	1	3	3	3	25.2	25.2	25.2	15.622	139	15.4868	15.5072	15.6567	15.5502	15.2822	15.2577	15.3103	15.2834
Unknown	sll0595	unknown protein	0.80606	Down	0.00292305																									2	2	2	1	2	2	2	13.3	13.3	13.3	15.78	143	14.9455	14.8955	14.901	14.914	14.5416	14.6306	14.6367	14.603
Unknown	slr1859	anti-sigma f factor antagonist	0.666863	Down	0.000244062																									4	4	4	1	4	4	4	39.8	39.8	39.8	11.99	108	17.6474	17.6591	17.7209	17.6758	17.0715	17.0935	17.1088	17.0913
Unknown	slr1672	glycerol kinase	0.397686	Down	0.000187582																									11	11	11	1	11	11	11	32.3	32.3	32.3	54.35	495	17.7143	17.6046	17.4791	17.5993	16.1987	16.3584	16.2501	16.269
Unknown	slr0573	unknown protein	0.741171	Down	0.00247127																									1	1	1	1	1	1	1	10.9	10.9	10.9	16.889	147	11.3866	11.3841	11.2941	11.3549	10.8435	11.002	10.923	10.9228
Unknown	slr0607	hypothetical protein	0.762804	Down	0.0211703																									2	2	2	1	2	2	2	15.5	15.5	15.5	14.377	129	15.3164	15.2748	15.0849	15.2254	14.8488	14.8719	14.7835	14.8348
Unknown	ssr0693	unknown protein	0.657669	Down	0.0108132																									1	1	1	1	1	1	1	10.5	10.5	10.5	10.598	95	14.7991	14.7438	14.5618	14.7016	14.0787	14.129	14.0833	14.097
Unknown	slr2030	hypothetical protein	0.804896	Down	0.00311518																									6	6	6	1	6	6	6	12.9	12.9	12.9	50.346	451	15.4222	15.4099	15.4256	15.4192	15.0642	15.1241	15.13	15.1061
Unknown	slr0380	hypothetical protein	0.776543	Down	0.00286416																									5	5	5	1	5	5	5	13.1	13.1	13.1	50.62	459	15.0658	15.0824	15.1785	15.1089	14.6615	14.7754	14.7953	14.7441
Unknown	sll1507	salt-induced periplasmic protein	0.768976	Down	0.00557493																									1	1	1	1	1	1	1	5	5	5	20.152	181	13.6622	13.6463	13.7078	13.6721	13.2075	13.3397	13.3321	13.2931
Unknown	slr1420	probable sugar kinase	0.267051	Down	0.000217162																									3	3	3	1	3	3	3	5.4	5.4	5.4	46.308	425	14.2271	14.0242	14.1116	14.121	12.179	12.2588	12.2106	12.2161
Unknown	ssr2551	hypothetical protein	0.737883	Down	0.0165186																									1	1	1	1	1	1	1	12.8	12.8	12.8	10.682	94	12.4214	12.169	12.4208	12.3371	11.9885	11.797	11.9101	11.8985
Unknown	sll1220	putative diaphorase subunit of the bidirectional hydrogenase	0.803292	Down	0.00185426																									4	4	4	1	4	4	4	34.7	34.7	34.7	18.759	173	15.7549	15.7695	15.8544	15.7929	15.4587	15.5355	15.4366	15.4769
Unknown	sll0944	hypothetical protein	0.506147	Down	0.0232371																									1	1	1	1	1	1	1	6.7	6.7	6.7	18.152	164	11.1718	10.9521	10.4936	10.8725	10.0828	9.78919	9.79835	9.89011
Unknown	ssl2296	spterin-4a-carbinolamine dehydratase	0.752725	Down	0.0231188																									3	3	3	1	3	3	3	63.5	63.5	63.5	10.734	96	13.7455	13.7512	13.9724	13.823	13.2442	13.4782	13.5173	13.4132
Unknown	slr1396	unknown protein	0.587321	Down	0.0416602																									2	2	2	1	2	2	2	11.2	11.2	11.2	24.034	205	14.1746	14.2904	13.677	14.0473	13.317	13.3792	13.1424	13.2795
Unknown	sll0253	hypothetical protein	0.826711	Down	0.00767375																									1	1	1	1	1	1	1	5	5	5	20.143	179	14.6911	14.5663	14.5786	14.612	14.2918	14.3668	14.3538	14.3375
Unknown	sll1296	two-component hybrid sensor and regulator	0.804367	Down	0.0062174																									15	15	15	1	15	15	15	17.4	17.4	17.4	101.71	924	17.583	17.5433	17.5347	17.5537	17.2151	17.1928	17.3109	17.2396
Unknown	slr1846	hypothetical protein YCF64	0.828775	Down	0.0332069																									1	1	1	1	1	1	1	8.4	8.4	8.4	11.94	107	13.5604	13.4371	13.4887	13.4954	13.3247	13.2458	13.103	13.2245
Unknown	slr1407	unknown protein	0.735506	Down	0.00169452																									7	7	7	1	7	7	7	28.7	28.7	28.7	32.018	289	16.7483	16.6922	16.7775	16.7393	16.3093	16.2948	16.2844	16.2962
Unknown	slr1856	phosphoprotein substrate of icfG gene cluster	0.817374	Down	0.000490653																									2	2	2	1	2	2	2	19.3	19.3	19.3	11.887	109	16.1141	16.1626	16.1459	16.1409	15.8856	15.817	15.8473	15.8499
Unknown	sll1590	two-component sensor histidine kinase	0.687388	Down	0.0276518																									2	2	2	1	2	2	2	6.3	6.3	6.3	39.445	350	13.6745	13.9354	13.6357	13.7485	13.2285	13.1925	13.2021	13.2077
Unknown	slr1260	hypothetical protein	0.829677	Down	0.0181876																									3	3	3	1	3	3	3	24.3	24.3	24.3	19.685	177	14.8439	14.9292	14.8515	14.8749	14.5263	14.7014	14.5888	14.6055
Unknown	slr1576	unknown protein	0.783523	Down	0.000202329																									4	4	4	1	4	4	4	32.1	32.1	32.1	11.331	106	16.4901	16.4509	16.4532	16.4647	16.0895	16.0998	16.149	16.1128
Unknown	slr6039	hypothetical protein;hypothetical protein	0.782808	Down	0.00717834																									6;6	6;6	6;6	2	6	6	6	20.9	20.9	20.9	22.852	196	17.4372	17.5105	17.3674	17.4384	17.058	17.1114	17.0859	17.0851
Unknown	sll0470	hypothetical protein	0.800057	Down	0.0117278																									4	4	4	1	4	4	4	24.2	24.2	24.2	20.719	186	14.8608	14.8979	14.7334	14.8307	14.5502	14.4703	14.506	14.5089
Unknown	slr1150	unknown protein	0.815636	Down	0.0365301																									3	3	3	1	3	3	3	19.4	19.4	19.4	18.995	170	14.8505	14.7541	14.759	14.7878	14.3568	14.5902	14.5346	14.4938
Unknown	slr1493	hypothetical protein	0.712435	Down	0.0186248																									1	1	1	1	1	1	1	5.6	5.6	5.6	13.585	124	9.76443	9.47047	9.71777	9.65089	9.21212	9.07472	9.19832	9.16172
Unknown	sll0247	iron-stress chlorophyll-binding protein, homologous to psbC (CP43)	0.653217	Down	0.00314665																									3	3	3	1	3	3	3	7.9	7.9	7.9	37.22	342	16.3145	16.2564	16.172	16.2476	15.6145	15.6429	15.6423	15.6333
Unknown	slr8022	hypothetical protein	0.770692	Down	0.0107744																									3	3	3	1	3	3	3	48.6	48.6	48.6	12.097	111	15.2936	15.1815	15.1503	15.2085	14.9473	14.73	14.8208	14.8327
Unknown	sll0754	ribosome binding factor A	0.825081	Down	0.00228797																									7	7	7	1	7	7	7	44.4	44.4	44.4	14.749	133	17.0572	16.9828	16.9601	17	16.681	16.7442	16.7427	16.7226
Unknown	sll0720	RTX toxin activating protein homolog	0.326032	Down	0.00636029																									1	1	1	1	1	1	1	4.8	4.8	4.8	16.959	147	13.3603	13.0194	13.5706	13.3167	11.7901	11.6555	11.6539	11.6998
Unknown	ssr1407	hypothetical protein	0.760368	Down	0.0166232																									2	2	2	1	2	2	2	18.3	18.3	18.3	10.443	93	11.9576	12.0799	11.8302	11.9559	11.5637	11.6234	11.4949	11.5607
Unknown	sll1783	hypothetical protein	0.760006	Down	0.00215698																									6	6	6	1	6	6	6	41.5	41.5	41.5	16.822	147	16.2167	16.2262	16.2051	16.216	15.7768	15.8581	15.8254	15.8201
Unknown	ssl2559	sferredoxin	0.706803	Down	0.000606462																									4	4	4	1	4	4	4	45.9	45.9	45.9	10.703	98	14.0473	14.023	14.1223	14.0642	13.5847	13.6153	13.4908	13.5636
Unknown	sll1193	hypothetical protein	0.80424	Down	0.00451862																									3	3	3	1	3	3	3	23	23	23	19.388	165	14.0486	14.0268	14.086	14.0538	13.7626	13.7856	13.6704	13.7395
Unknown	sll1293	unknown protein	0.659729	Down	0.0247411																									3	3	3	1	3	3	3	20	20	20	16.885	155	14.5008	14.461	14.7719	14.5779	13.9625	13.9787	13.9923	13.9778
Unknown	sll0685	hypothetical protein	0.630198	Down	0.000238557																									6	6	6	1	6	6	6	43.2	43.2	43.2	17.187	162	16.3411	16.3048	16.2122	16.286	15.5643	15.6304	15.665	15.6199
Unknown	ssr2201	unknown protein	0.819285	Down	0.0225891																									1	1	1	1	1	1	1	15.3	15.3	15.3	8.4003	72	12.9841	12.9724	13.1582	13.0382	12.6967	12.7407	12.8146	12.7507
Unknown	sll0656	unknown protein	0.72507	Down	0.00766341																									17	17	17	1	17	17	17	13.9	13.9	13.9	196.53	1879	18.643	18.7134	18.5136	18.6233	18.1109	18.1886	18.179	18.1595
Unknown	sll0639	hypothetical protein	0.787756	Down	0.0114136																									3	3	3	1	3	3	3	5.8	5.8	5.8	45.927	417	14.3816	14.4289	14.4529	14.4211	14.128	14.127	13.9759	14.077
Unknown	sll1118	hypothetical protein	0.743966	Down	0.000944384																									4	4	4	1	4	4	4	45.4	45.4	45.4	11.45	108	14.7931	14.8709	14.7624	14.8088	14.3428	14.4027	14.4008	14.3821
Unknown	slr1077	probable glycosyltransferase	0.759132	Down	0.0129974																									4	4	4	1	4	4	4	12.4	12.4	12.4	43.52	386	14.3565	14.2276	14.3384	14.3075	13.7973	13.8977	14.0347	13.9099
Unknown	sll1182	cytochrome b6-f complex alternative iron-sulfur subunit (Rieske iron sulfur protein)	0.780029	Down	0.0126917																									3	3	3	1	3	3	3	47.4	47.4	47.4	13.72	133	16.3613	16.2624	16.4819	16.3685	16.0865	16.0173	15.9267	16.0101
Unknown	slr2016	type 4 pilin-like protein, essential for motility	0.750224	Down	4.73e-05																									7	7	7	1	7	7	7	60.1	60.1	60.1	17.538	158	17.9454	17.9115	17.9405	17.9325	17.5138	17.5452	17.4946	17.5179
Unknown	ssl1911	sglutamine synthetase inactivating factor IF7	0.559212	Down	0.000967809																									5	5	5	1	5	5	5	53.8	53.8	53.8	7.4753	65	17.2228	17.1269	17.3447	17.2314	16.4555	16.3975	16.3258	16.3929
Unknown	sll0654	alkaline phosphatase	0.638796	Down	0.000484645																									33	33	33	1	33	33	33	35.3	35.3	35.3	149.39	1409	20.1951	20.163	20.1616	20.1732	19.4725	19.5615	19.546	19.5267
Unknown	slr1853	carboxymuconolactone decarboxylase	0.639225	Down	0.000569778																									5	5	5	1	5	5	5	41.6	41.6	41.6	12.111	113	16.8828	17.0002	16.901	16.928	16.2608	16.2136	16.3728	16.2824
Unknown	sll1784	periplasmic protein, function unknown	0.811738	Down	0.00879797																									6	6	6	1	6	6	6	34.5	34.5	34.5	29.757	267	17.7165	17.8005	17.8811	17.7994	17.4238	17.5217	17.5499	17.4985
Unknown	sll1294	methyl-accepting chemotaxis protein	0.774466	Down	0.00454732																									35	35	35	1	35	35	35	44.9	44.9	44.9	103.18	953	18.6117	18.5827	18.4557	18.5501	18.102	18.2334	18.2086	18.1813
Unknown	ssr0657	hypothetical protein	0.741629	Down	0.00189122																									3	3	3	1	3	3	3	43.3	43.3	43.3	10.546	97	13.1089	13.2466	13.1995	13.185	12.7055	12.7853	12.7706	12.7538
Cytoplasmic	sll0896	Holliday juction resolvase RuvC	0.796963	Down	0.012996																									1	1	1	1	1	1	1	5.4	5.4	5.4	18.193	167	11.2608	11.1807	11.0828	11.1748	10.9569	10.7694	10.8158	10.8473
Cytoplasmic	sll0744	hypothetical protein	0.831862	Down	0.0256533																									3	3	3	1	3	3	3	12.2	12.2	12.2	38.44	343	12.2944	12.2378	12.0975	12.2099	12.0048	11.8829	11.9453	11.9443
Cytoplasmic	slr1855	unknown protein	0.795026	Down	0.000381646																									25	25	25	1	25	25	25	45.5	45.5	45.5	70.003	607	18.8145	18.8192	18.8814	18.8384	18.4772	18.5332	18.5119	18.5074
Cytoplasmic	sll0745	phosphofructokinase	0.822766	Down	0.0340219																									3	3	3	1	3	3	3	9.9	9.9	9.9	41.759	384	14.1692	14.0308	14.228	14.1427	13.8724	13.8321	13.8792	13.8612
Cytoplasmic	slr0288	glutamate--ammonia ligase	0.826227	Down	0.000485587																									25	25	25	1	25	25	25	36.9	36.9	36.9	79.209	724	19.34	19.2741	19.3154	19.3099	19.0657	19.0346	19.0031	19.0345
Cytoplasmic	slr0983	glucose-1-phosphate cytidylyltransferase	0.813957	Down	0.00824476																									5	5	5	1	5	5	5	17.2	17.2	17.2	28.793	256	14.6442	14.6115	14.7633	14.673	14.414	14.3044	14.4097	14.376
Cytoplasmic	slr1857	isoamylase	0.772232	Down	0.00369216																									10	9	9	1	10	9	9	14.3	13.2	13.2	79.894	707	17.2115	17.2014	17.2931	17.2354	16.8491	16.8769	16.8613	16.8625
Cytoplasmic	slr1019	phenazine biosynthetic protein PhzF homolog	0.609735	Down	0.00940831																									1	1	1	1	1	1	1	5.7	5.7	5.7	34.109	314	12.3124	12.2508	12.3881	12.3171	11.4835	11.5316	11.7949	11.6033
Cytoplasmic	sll1330	two-component system response regulator OmpR subfamily	0.750973	Down	0.00751941																									3	3	3	1	3	3	3	10.4	10.4	10.4	28.301	250	14.4748	14.4829	14.4644	14.474	14.1227	14.0688	13.9911	14.0609
Cytoplasmic	slr1535	hypothetical protein	0.561514	Down	5.66e-05																									8	8	8	1	8	8	8	19.6	19.6	19.6	55.017	489	15.962	15.9015	15.8773	15.9136	15.1095	15.0724	15.0611	15.081
Cytoplasmic	slr5082	hypothetical protein	0.59352	Down	0.000157531																									8	8	0	1	8	8	0	29.3	29.3	0	31.462	276	18.246	18.1958	18.2426	18.2281	17.4784	17.4824	17.4657	17.4755
Cytoplasmic	slr1945	2,3-bisphosphoglycerate-independent phosphoglycerate mutase	0.816149	Down	0.000163232																									13	13	13	1	13	13	13	29.7	29.7	29.7	57.981	532	17.341	17.319	17.2875	17.3158	17.0199	17.0489	16.9994	17.0227
Cytoplasmic	sll1304	unknown protein	0.776521	Down	0.0295305																									8	8	8	1	8	8	8	26.5	26.5	26.5	32.848	287	17.418	17.4242	17.3495	17.3972	16.936	16.9826	17.1784	17.0323
Cytoplasmic	slr1852	unknown protein	0.694024	Down	0.00818314																									12	12	12	1	12	12	12	67	67	67	21.834	188	18.9543	18.8467	18.7573	18.8528	18.3451	18.297	18.3354	18.3258
Cytoplasmic	sll0783	unknown protein	0.636073	Down	0.000245058																									3	3	3	1	3	3	3	21.2	21.2	21.2	17.64	160	16.8564	16.8486	16.9386	16.8812	16.1564	16.2841	16.2448	16.2284
Cytoplasmic	sll1536	molybdopterin biosynthesis MoeB protein	0.816925	Down	0.00571323																									13	13	13	1	13	13	13	45.7	45.7	45.7	42.759	392	18.2	18.23	18.1927	18.2075	17.8591	17.9656	17.9228	17.9158
Cytoplasmic	slr0666	unknown protein	0.728869	Down	0.000354285																									6	6	6	1	6	6	6	22.2	22.2	22.2	32.245	275	15.4666	15.4641	15.5306	15.4871	15.0522	15.0151	15.0253	15.0308
Cytoplasmic	sll1552	unknown protein	0.456577	Down	8.5e-05																									10	10	10	1	10	10	10	33	33	33	33.941	300	17.2392	17.1319	17.2773	17.2161	16.1031	16.1222	16.0298	16.0851
Cytoplasmic	slr1854	unknown protein	0.707808	Down	0.00189444																									7	7	7	1	7	7	7	32.3	32.3	32.3	22.293	198	17.9057	17.8889	17.8703	17.8883	17.3335	17.3935	17.4423	17.3898
CytoplasmicMembrane	slr1651	ABC transporter ATP-binding protein	0.568468	Down	0.00325447																									1	1	1	1	1	1	1	1.2	1.2	1.2	81.299	733	14.5454	14.4736	14.7423	14.5871	13.7001	13.7845	13.8322	13.7723
CytoplasmicMembrane	slr1593	hypothetical protein	0.695846	Down	0.0319217																									1	1	1	1	1	1	1	3.3	3.3	3.3	33.886	303	12.3544	12.2784	12.5396	12.3908	12.1063	11.6832	11.8135	11.8677
CytoplasmicMembrane	sll0290	polyphosphate kinase	0.724997	Down	0.00107202																									23	23	23	1	23	23	23	37.6	37.6	37.6	82.606	728	18.3709	18.4063	18.3602	18.3791	17.9288	17.959	17.8577	17.9152
CytoplasmicMembrane	sll0684	phosphate transport ATP-binding protein PstB homolog	0.379579	Down	0.000951086																									10	9	9	1	10	9	9	47	44	44	29.244	266	17.8344	17.7677	17.6009	17.7343	16.2958	16.3795	16.3351	16.3368
CytoplasmicMembrane	slr1248	phosphate transport system permease protein PstC homolog	0.559516	Down	0.000163714																									3	3	3	1	3	3	3	5.8	5.8	5.8	34.798	328	14.9018	14.854	14.8735	14.8764	13.9907	14.0905	14.0348	14.0387
CytoplasmicMembrane	slr0602	unknown protein	0.712408	Down	0.00135789																									3	3	3	1	3	3	3	20.2	20.2	20.2	14.418	129	15.0309	15.0318	15.0379	15.0335	14.5078	14.5729	14.5523	14.5443
CytoplasmicMembrane	sll0679	periplasmic phosphate-binding protein of ABC transporter	0.558463	Down	3.89e-05																									13	13	13	1	13	13	13	32.4	32.4	32.4	36.778	336	18.7044	18.6275	18.6184	18.6501	17.8426	17.8085	17.7778	17.8096
CytoplasmicMembrane	slr1860	carbon metabolisms regulatory protein IcfG	0.807495	Down	0.00342716																									8	8	8	1	8	8	8	12	12	12	70.961	634	16.3351	16.3252	16.2196	16.2933	15.9437	16.0468	15.9638	15.9848
CytoplasmicMembrane	sll0681	phosphate transport system permease protein PstC homolog	0.509139	Down	0.0108182																									3	3	3	1	3	3	3	11	11	11	33.848	317	16.0095	16.0257	15.6857	15.907	14.9189	14.9719	14.9086	14.9331
CytoplasmicMembrane	slr1114	hypothetical protein	0.688728	Down	0.0011468																									2	2	2	1	2	2	2	4.4	4.4	4.4	65.519	585	13.2751	13.252	13.3792	13.3021	12.7821	12.7871	12.7231	12.7641
CytoplasmicMembrane	sll0450	cytochrome b subunit of nitric oxide reductase	0.764289	Down	0.0117905																									2	2	2	1	2	2	2	4.3	4.3	4.3	81.292	736	13.8169	13.7049	13.9271	13.8163	13.4661	13.4628	13.3566	13.4285
CytoplasmicMembrane	slr0798	zinc-transporting P-type ATPase (zinc efflux pump) involved in zinc tolerance	0.643713	Down	0.00287913																									10	10	10	1	10	10	10	16.2	16.2	16.2	76.883	721	17.073	17.0714	17.0599	17.0681	16.4671	16.4701	16.3607	16.4326
CytoplasmicMembrane	sll0682	phosphate transport system permease protein PstA homolog	0.219404	Down	0.000130626																									1	1	1	1	1	1	1	2.4	2.4	2.4	30.171	287	15.3322	15.1605	15.2925	15.2617	13.1134	13.2014	12.9054	13.0734
CytoplasmicMembrane	sll0360	hypothetical protein	0.823139	Down	0.00214826																									1	1	1	1	1	1	1	5.1	5.1	5.1	30.733	277	14.765	14.7768	14.725	14.7556	14.4213	14.4977	14.5054	14.4748
CytoplasmicMembrane	slr0753	probable transport protein	0.624296	Down	0.0101118																									2	2	2	1	2	2	2	5.6	5.6	5.6	48.003	449	14.1969	14.0737	14.3484	14.2063	13.5057	13.5094	13.5648	13.5266
CytoplasmicMembrane	slr1681	unknown protein	0.80876	Down	0.00245477																									6	6	6	1	6	6	6	22.8	22.8	22.8	33.124	320	15.5062	15.4337	15.4162	15.452	15.1727	15.1334	15.1313	15.1458
CytoplasmicMembrane	sll0683	phosphate transport ATP-binding protein PstB homolog	0.289375	Down	0.000437045																									11	11	10	1	11	11	10	49.8	49.8	46.8	30.21	269	18.0366	17.9002	17.8229	17.9199	16.1107	16.1725	16.1096	16.1309
Extracellular	slr1851	hypothetical protein	0.828784	Down	0.0232887																									6	6	6	1	6	6	6	25.9	25.9	25.9	16.93	162	15.5701	15.5925	15.7361	15.6329	15.397	15.3614	15.3274	15.3619
Extracellular	slr1403	unknown protein	0.671315	Down	0.00198977																									7	7	7	1	7	7	7	2.7	2.7	2.7	311.51	3016	15.4851	15.4927	15.5049	15.4942	14.9379	14.8608	14.9592	14.9193
Extracellular	sll0723	unknown protein	0.756191	Down	4.32e-06																									22	22	22	1	22	22	22	14.2	14.2	14.2	192.16	1771	18.1424	18.1169	18.1345	18.1312	17.7189	17.7275	17.7378	17.7281
Extracellular	sll1305	probable hydrolase	0.288281	Down	0.000117475																									6	6	6	1	6	6	6	19.7	19.7	19.7	32.885	295	17.9525	18.1734	17.8985	18.0081	16.1081	16.3251	16.2078	16.2137
Extracellular	sll0721	unknown protein	0.807853	Down	0.00158411																									4	4	4	1	4	4	4	2.9	2.9	2.9	139.55	1290	15.479	15.5039	15.4766	15.4865	15.1391	15.2112	15.1856	15.1786
Periplasmic	slr1247	phosphate-binding periplasmic protein precursor (PBP)	0.471018	Down	7.15e-05																									12	12	12	1	12	12	12	43.8	43.8	43.8	35.289	333	17.7432	17.6504	17.6989	17.6975	16.6233	16.6748	16.5359	16.6113
Periplasmic	sll0680	phosphate-binding periplasmic protein precursor (PBP)	0.398914	Down	0.000106931																									12	12	12	1	12	12	12	52	52	52	40.023	383	20.0003	19.9954	19.8328	19.9428	18.5811	18.6889	18.5809	18.617
[truncated: 4 more columns]
