# Supplementary material for: Proteomic analysis of the regulatory networks of ClpX in a model cyanobacterium Synechocystis sp. PCC 6803
Source: Front Plant Sci. 2022 Sep 29;13:994056. doi: 10.3389/fpls.2022.994056 (PMC9560874; doi:10.3389/fpls.2022.994056)
Supplement: Supplementary file 9 [file Table_8.xlsx]

## Sheet: Table S8A
Table S8A. GO enrichment of up-regulated DEPs in Synechocystis sp. PCC 6803
GO Terms Category	GO Terms ID	GO Terms Level	GO Terms Description	Fold Enrichment	P-Value	Protein accession	Protein description	Peptide counts (all)	ClpX/WT Ratio	ClpX/WT P value	Regulated Type
Biological Process	GO:0043603	5	cellular amide metabolic process	2.34	0.0303332	sll0767	50S ribosomal protein L20	5	1.45848	0.000737967	Up
Biological Process	GO:0046390	7	ribose phosphate biosynthetic process	2.22	0.14579	slr1882	riboflavin biosynthesis protein RibF	4	1.21063	0.0322916	Up
Biological Process	GO:0046390	7	ribose phosphate biosynthetic process	2.22	0.14579	slr0553	hypothetical protein	8	1.25944	0.00112341	Up
Biological Process	GO:0009124	9	nucleoside monophosphate biosynthetic process	3.16	0.12836	ssl2615	sATP synthase C chain of CF(0)	1	1.26488	0.0383206	Up
Biological Process	GO:0009124	9	nucleoside monophosphate biosynthetic process	3.16	0.12836	slr1882	riboflavin biosynthesis protein RibF	4	1.21063	0.0322916	Up
Biological Process	GO:0034220	6	ion transmembrane transport	3.31	0.118666	ssl2615	sATP synthase C chain of CF(0)	1	1.26488	0.0383206	Up
Biological Process	GO:0034220	6	ion transmembrane transport	3.31	0.118666	sll0834	low affinity sulfate transporter	5	1.24753	0.00190778	Up
Biological Process	GO:0006996	5	organelle organization	2.61	0.10074	sll1817	30S ribosomal protein S11	7	1.27845	0.0124393	Up
Biological Process	GO:0006996	5	organelle organization	2.61	0.10074	sll1802	50S ribosomal protein L2	14	1.22687	0.00476438	Up
Biological Process	GO:0006996	5	organelle organization	2.61	0.10074	sll0767	50S ribosomal protein L20	5	1.45848	0.000737967	Up
Biological Process	GO:0034645	6	cellular macromolecule biosynthetic process	1.99	0.0972128	smr0011	smr0011 50S ribosomal protein L34	1	1.67694	0.000170423	Up
Biological Process	GO:0034645	6	cellular macromolecule biosynthetic process	1.99	0.0972128	sll1817	30S ribosomal protein S11	7	1.27845	0.0124393	Up
Biological Process	GO:0034645	6	cellular macromolecule biosynthetic process	1.99	0.0972128	sll1807	50S ribosomal protein L24	7	1.76663	0.000260519	Up
Biological Process	GO:0046390	7	ribose phosphate biosynthetic process	2.22	0.14579	ssl2615	sATP synthase C chain of CF(0)	1	1.26488	0.0383206	Up
Biological Process	GO:0034645	6	cellular macromolecule biosynthetic process	1.99	0.0972128	sll1802	50S ribosomal protein L2	14	1.22687	0.00476438	Up
Biological Process	GO:0034645	6	cellular macromolecule biosynthetic process	1.99	0.0972128	sll0767	50S ribosomal protein L20	5	1.45848	0.000737967	Up
Biological Process	GO:0009059	5	macromolecule biosynthetic process	1.99	0.0972128	smr0011	smr0011 50S ribosomal protein L34	1	1.67694	0.000170423	Up
Biological Process	GO:0009059	5	macromolecule biosynthetic process	1.99	0.0972128	sll1817	30S ribosomal protein S11	7	1.27845	0.0124393	Up
Biological Process	GO:0009059	5	macromolecule biosynthetic process	1.99	0.0972128	sll1807	50S ribosomal protein L24	7	1.76663	0.000260519	Up
Biological Process	GO:0009059	5	macromolecule biosynthetic process	1.99	0.0972128	sll1802	50S ribosomal protein L2	14	1.22687	0.00476438	Up
Biological Process	GO:0009059	5	macromolecule biosynthetic process	1.99	0.0972128	sll1096	30S ribosomal protein S12	3	1.31906	0.0189003	Up
Biological Process	GO:0009059	5	macromolecule biosynthetic process	1.99	0.0972128	sll0767	50S ribosomal protein L20	5	1.45848	0.000737967	Up
Biological Process	GO:0034622	7	cellular protein-containing complex assembly	2.82	0.0836204	sll1817	30S ribosomal protein S11	7	1.27845	0.0124393	Up
Biological Process	GO:0034622	7	cellular protein-containing complex assembly	2.82	0.0836204	sll1802	50S ribosomal protein L2	14	1.22687	0.00476438	Up
Biological Process	GO:0034622	7	cellular protein-containing complex assembly	2.82	0.0836204	sll0767	50S ribosomal protein L20	5	1.45848	0.000737967	Up
Biological Process	GO:1901566	5	organonitrogen compound biosynthetic process	1.55	0.0800338	ssl2615	sATP synthase C chain of CF(0)	1	1.26488	0.0383206	Up
Biological Process	GO:1901566	5	organonitrogen compound biosynthetic process	1.55	0.0800338	smr0011	smr0011 50S ribosomal protein L34	1	1.67694	0.000170423	Up
Biological Process	GO:0034645	6	cellular macromolecule biosynthetic process	1.99	0.0972128	sll1096	30S ribosomal protein S12	3	1.31906	0.0189003	Up
Biological Process	GO:1901566	5	organonitrogen compound biosynthetic process	1.55	0.0800338	slr1882	riboflavin biosynthesis protein RibF	4	1.21063	0.0322916	Up
Biological Process	GO:0065003	6	protein-containing complex assembly	2.22	0.14579	sll0767	50S ribosomal protein L20	5	1.45848	0.000737967	Up
Biological Process	GO:0065003	6	protein-containing complex assembly	2.22	0.14579	sll1817	30S ribosomal protein S11	7	1.27845	0.0124393	Up
Biological Process	GO:0044260	5	cellular macromolecule metabolic process	1.51	0.183527	sll1802	50S ribosomal protein L2	14	1.22687	0.00476438	Up
Biological Process	GO:0044260	5	cellular macromolecule metabolic process	1.51	0.183527	sll1096	30S ribosomal protein S12	3	1.31906	0.0189003	Up
Biological Process	GO:0044260	5	cellular macromolecule metabolic process	1.51	0.183527	sll0767	50S ribosomal protein L20	5	1.45848	0.000737967	Up
Biological Process	GO:0044260	5	cellular macromolecule metabolic process	1.51	0.183527	sll0555	methionine aminopeptidase	4	1.24059	0.0121005	Up
Biological Process	GO:0009123	8	nucleoside monophosphate metabolic process	2.58	0.179405	ssl2615	sATP synthase C chain of CF(0)	1	1.26488	0.0383206	Up
Biological Process	GO:0009123	8	nucleoside monophosphate metabolic process	2.58	0.179405	slr1882	riboflavin biosynthesis protein RibF	4	1.21063	0.0322916	Up
Biological Process	GO:0043933	5	protein-containing complex subunit organization	2.09	0.166991	sll1817	30S ribosomal protein S11	7	1.27845	0.0124393	Up
Biological Process	GO:0043933	5	protein-containing complex subunit organization	2.09	0.166991	sll1802	50S ribosomal protein L2	14	1.22687	0.00476438	Up
Biological Process	GO:0043933	5	protein-containing complex subunit organization	2.09	0.166991	sll0767	50S ribosomal protein L20	5	1.45848	0.000737967	Up
Biological Process	GO:0006811	5	ion transport	2.78	0.158539	ssl2615	sATP synthase C chain of CF(0)	1	1.26488	0.0383206	Up
Biological Process	GO:0006811	5	ion transport	2.78	0.158539	sll0834	low affinity sulfate transporter	5	1.24753	0.00190778	Up
Biological Process	GO:0042221	3	response to chemical	2.78	0.158539	sll1598	Mn transporter MntC	5	1.27496	0.0206485	Up
Biological Process	GO:0065003	6	protein-containing complex assembly	2.22	0.14579	sll1802	50S ribosomal protein L2	14	1.22687	0.00476438	Up
Biological Process	GO:0042221	3	response to chemical	2.78	0.158539	sll0533	trigger factor	20	1.3008	0.00133717	Up
Biological Process	GO:0016072	9	rRNA metabolic process	2.9	0.148314	sll1817	30S ribosomal protein S11	7	1.27845	0.0124393	Up
Biological Process	GO:0006364	10	rRNA processing	2.9	0.148314	slr0955	probable tRNA/rRNA methyltransferase	10	1.50199	6.52e-05	Up
Biological Process	GO:0006364	10	rRNA processing	2.9	0.148314	sll1817	30S ribosomal protein S11	7	1.27845	0.0124393	Up
Biological Process	GO:0009161	9	ribonucleoside monophosphate metabolic process	2.9	0.148314	ssl2615	sATP synthase C chain of CF(0)	1	1.26488	0.0383206	Up
Biological Process	GO:0009161	9	ribonucleoside monophosphate metabolic process	2.9	0.148314	slr1882	riboflavin biosynthesis protein RibF	4	1.21063	0.0322916	Up
Biological Process	GO:0009117	8	nucleotide metabolic process	1.9	0.146571	ssl2615	sATP synthase C chain of CF(0)	1	1.26488	0.0383206	Up
Biological Process	GO:0009117	8	nucleotide metabolic process	1.9	0.146571	slr1882	riboflavin biosynthesis protein RibF	4	1.21063	0.0322916	Up
Biological Process	GO:0009117	8	nucleotide metabolic process	1.9	0.146571	slr1369	phosphatidate cytidylyltransferase	2	1.23817	0.00233829	Up
Biological Process	GO:0009117	8	nucleotide metabolic process	1.9	0.146571	slr0553	hypothetical protein	8	1.25944	0.00112341	Up
Biological Process	GO:0009260	10	ribonucleotide biosynthetic process	2.22	0.14579	ssl2615	sATP synthase C chain of CF(0)	1	1.26488	0.0383206	Up
Biological Process	GO:0009260	10	ribonucleotide biosynthetic process	2.22	0.14579	slr1882	riboflavin biosynthesis protein RibF	4	1.21063	0.0322916	Up
Biological Process	GO:0009260	10	ribonucleotide biosynthetic process	2.22	0.14579	slr0553	hypothetical protein	8	1.25944	0.00112341	Up
Biological Process	GO:0016072	9	rRNA metabolic process	2.9	0.148314	slr0955	probable tRNA/rRNA methyltransferase	10	1.50199	6.52e-05	Up
Biological Process	GO:0044260	5	cellular macromolecule metabolic process	1.51	0.183527	sll1807	50S ribosomal protein L24	7	1.76663	0.000260519	Up
Biological Process	GO:1901566	5	organonitrogen compound biosynthetic process	1.55	0.0800338	slr1369	phosphatidate cytidylyltransferase	2	1.23817	0.00233829	Up
Biological Process	GO:1901566	5	organonitrogen compound biosynthetic process	1.55	0.0800338	sll1817	30S ribosomal protein S11	7	1.27845	0.0124393	Up
Biological Process	GO:0042254	6	ribosome biogenesis	2.53	0.063967	sll1817	30S ribosomal protein S11	7	1.27845	0.0124393	Up
Biological Process	GO:0042254	6	ribosome biogenesis	2.53	0.063967	sll1802	50S ribosomal protein L2	14	1.22687	0.00476438	Up
Biological Process	GO:0042254	6	ribosome biogenesis	2.53	0.063967	sll0767	50S ribosomal protein L20	5	1.45848	0.000737967	Up
Biological Process	GO:0042255	7	ribosome assembly	3.16	0.0631033	sll1817	30S ribosomal protein S11	7	1.27845	0.0124393	Up
Biological Process	GO:0042255	7	ribosome assembly	3.16	0.0631033	sll1802	50S ribosomal protein L2	14	1.22687	0.00476438	Up
Biological Process	GO:0042255	7	ribosome assembly	3.16	0.0631033	sll0767	50S ribosomal protein L20	5	1.45848	0.000737967	Up
Biological Process	GO:0019538	5	protein metabolic process	1.98	0.0611738	smr0011	smr0011 50S ribosomal protein L34	1	1.67694	0.000170423	Up
Biological Process	GO:0019538	5	protein metabolic process	1.98	0.0611738	sll1817	30S ribosomal protein S11	7	1.27845	0.0124393	Up
Biological Process	GO:0019538	5	protein metabolic process	1.98	0.0611738	sll1807	50S ribosomal protein L24	7	1.76663	0.000260519	Up
Biological Process	GO:0019538	5	protein metabolic process	1.98	0.0611738	sll1802	50S ribosomal protein L2	14	1.22687	0.00476438	Up
Biological Process	GO:0019538	5	protein metabolic process	1.98	0.0611738	sll1096	30S ribosomal protein S12	3	1.31906	0.0189003	Up
Biological Process	GO:0019538	5	protein metabolic process	1.98	0.0611738	sll0767	50S ribosomal protein L20	5	1.45848	0.000737967	Up
Biological Process	GO:0042254	6	ribosome biogenesis	2.53	0.063967	slr0955	probable tRNA/rRNA methyltransferase	10	1.50199	6.52e-05	Up
Biological Process	GO:0019538	5	protein metabolic process	1.98	0.0611738	sll0555	methionine aminopeptidase	4	1.24059	0.0121005	Up
Biological Process	GO:0044271	5	cellular nitrogen compound biosynthetic process	1.82	0.0314094	smr0011	smr0011 50S ribosomal protein L34	1	1.67694	0.000170423	Up
Biological Process	GO:0044271	5	cellular nitrogen compound biosynthetic process	1.82	0.0314094	slr1882	riboflavin biosynthesis protein RibF	4	1.21063	0.0322916	Up
Biological Process	GO:0044271	5	cellular nitrogen compound biosynthetic process	1.82	0.0314094	slr1369	phosphatidate cytidylyltransferase	2	1.23817	0.00233829	Up
Biological Process	GO:0044271	5	cellular nitrogen compound biosynthetic process	1.82	0.0314094	slr0553	hypothetical protein	8	1.25944	0.00112341	Up
Biological Process	GO:0044271	5	cellular nitrogen compound biosynthetic process	1.82	0.0314094	sll1817	30S ribosomal protein S11	7	1.27845	0.0124393	Up
Biological Process	GO:0044271	5	cellular nitrogen compound biosynthetic process	1.82	0.0314094	sll1807	50S ribosomal protein L24	7	1.76663	0.000260519	Up
Biological Process	GO:0044271	5	cellular nitrogen compound biosynthetic process	1.82	0.0314094	sll1802	50S ribosomal protein L2	14	1.22687	0.00476438	Up
Biological Process	GO:0044271	5	cellular nitrogen compound biosynthetic process	1.82	0.0314094	sll1096	30S ribosomal protein S12	3	1.31906	0.0189003	Up
Biological Process	GO:0044271	5	cellular nitrogen compound biosynthetic process	1.82	0.0314094	sll0767	50S ribosomal protein L20	5	1.45848	0.000737967	Up
Biological Process	GO:0043603	5	cellular amide metabolic process	2.34	0.0303332	smr0011	smr0011 50S ribosomal protein L34	1	1.67694	0.000170423	Up
Biological Process	GO:0043603	5	cellular amide metabolic process	2.34	0.0303332	sll1817	30S ribosomal protein S11	7	1.27845	0.0124393	Up
Biological Process	GO:0043603	5	cellular amide metabolic process	2.34	0.0303332	sll1807	50S ribosomal protein L24	7	1.76663	0.000260519	Up
Biological Process	GO:0044271	5	cellular nitrogen compound biosynthetic process	1.82	0.0314094	ssl2615	sATP synthase C chain of CF(0)	1	1.26488	0.0383206	Up
Biological Process	GO:1901566	5	organonitrogen compound biosynthetic process	1.55	0.0800338	slr0553	hypothetical protein	8	1.25944	0.00112341	Up
Biological Process	GO:0022613	5	ribonucleoprotein complex biogenesis	2.48	0.0676343	sll0767	50S ribosomal protein L20	5	1.45848	0.000737967	Up
Biological Process	GO:0022613	5	ribonucleoprotein complex biogenesis	2.48	0.0676343	sll1817	30S ribosomal protein S11	7	1.27845	0.0124393	Up
Biological Process	GO:1901566	5	organonitrogen compound biosynthetic process	1.55	0.0800338	sll1807	50S ribosomal protein L24	7	1.76663	0.000260519	Up
Biological Process	GO:1901566	5	organonitrogen compound biosynthetic process	1.55	0.0800338	sll1802	50S ribosomal protein L2	14	1.22687	0.00476438	Up
Biological Process	GO:1901566	5	organonitrogen compound biosynthetic process	1.55	0.0800338	sll1096	30S ribosomal protein S12	3	1.31906	0.0189003	Up
Biological Process	GO:1901566	5	organonitrogen compound biosynthetic process	1.55	0.0800338	sll0767	50S ribosomal protein L20	5	1.45848	0.000737967	Up
Biological Process	GO:1901293	8	nucleoside phosphate biosynthetic process	2.4	0.0753087	ssl2615	sATP synthase C chain of CF(0)	1	1.26488	0.0383206	Up
Biological Process	GO:1901293	8	nucleoside phosphate biosynthetic process	2.4	0.0753087	slr1882	riboflavin biosynthesis protein RibF	4	1.21063	0.0322916	Up
Biological Process	GO:1901293	8	nucleoside phosphate biosynthetic process	2.4	0.0753087	slr1369	phosphatidate cytidylyltransferase	2	1.23817	0.00233829	Up
Biological Process	GO:1901293	8	nucleoside phosphate biosynthetic process	2.4	0.0753087	slr0553	hypothetical protein	8	1.25944	0.00112341	Up
Biological Process	GO:0009165	9	nucleotide biosynthetic process	2.4	0.0753087	ssl2615	sATP synthase C chain of CF(0)	1	1.26488	0.0383206	Up
Biological Process	GO:0009165	9	nucleotide biosynthetic process	2.4	0.0753087	slr1882	riboflavin biosynthesis protein RibF	4	1.21063	0.0322916	Up
Biological Process	GO:0009165	9	nucleotide biosynthetic process	2.4	0.0753087	slr1369	phosphatidate cytidylyltransferase	2	1.23817	0.00233829	Up
Biological Process	GO:0009165	9	nucleotide biosynthetic process	2.4	0.0753087	slr0553	hypothetical protein	8	1.25944	0.00112341	Up
Biological Process	GO:0022613	5	ribonucleoprotein complex biogenesis	2.48	0.0676343	sll1802	50S ribosomal protein L2	14	1.22687	0.00476438	Up
Biological Process	GO:0042273	7	ribosomal large subunit biogenesis	4.35	0.0737657	sll1802	50S ribosomal protein L2	14	1.22687	0.00476438	Up
Biological Process	GO:0000027	9	ribosomal large subunit assembly	4.35	0.0737657	sll1802	50S ribosomal protein L2	14	1.22687	0.00476438	Up
Biological Process	GO:0000027	9	ribosomal large subunit assembly	4.35	0.0737657	sll0767	50S ribosomal protein L20	5	1.45848	0.000737967	Up
Biological Process	GO:0070925	6	organelle assembly	3.07	0.0679744	sll1817	30S ribosomal protein S11	7	1.27845	0.0124393	Up
Biological Process	GO:0070925	6	organelle assembly	3.07	0.0679744	sll1802	50S ribosomal protein L2	14	1.22687	0.00476438	Up
Biological Process	GO:0070925	6	organelle assembly	3.07	0.0679744	sll0767	50S ribosomal protein L20	5	1.45848	0.000737967	Up
Biological Process	GO:0071826	6	ribonucleoprotein complex subunit organization	3.07	0.0679744	sll1817	30S ribosomal protein S11	7	1.27845	0.0124393	Up
Biological Process	GO:0071826	6	ribonucleoprotein complex subunit organization	3.07	0.0679744	sll1802	50S ribosomal protein L2	14	1.22687	0.00476438	Up
Biological Process	GO:0071826	6	ribonucleoprotein complex subunit organization	3.07	0.0679744	sll0767	50S ribosomal protein L20	5	1.45848	0.000737967	Up
Biological Process	GO:0022618	8	ribonucleoprotein complex assembly	3.07	0.0679744	sll1817	30S ribosomal protein S11	7	1.27845	0.0124393	Up
Biological Process	GO:0022618	8	ribonucleoprotein complex assembly	3.07	0.0679744	sll1802	50S ribosomal protein L2	14	1.22687	0.00476438	Up
Biological Process	GO:0022618	8	ribonucleoprotein complex assembly	3.07	0.0679744	sll0767	50S ribosomal protein L20	5	1.45848	0.000737967	Up
Biological Process	GO:0022613	5	ribonucleoprotein complex biogenesis	2.48	0.0676343	slr0955	probable tRNA/rRNA methyltransferase	10	1.50199	6.52e-05	Up
Biological Process	GO:0042273	7	ribosomal large subunit biogenesis	4.35	0.0737657	sll0767	50S ribosomal protein L20	5	1.45848	0.000737967	Up
Biological Process	GO:0043603	5	cellular amide metabolic process	2.34	0.0303332	sll1802	50S ribosomal protein L2	14	1.22687	0.00476438	Up
Biological Process	GO:0044260	5	cellular macromolecule metabolic process	1.51	0.183527	sll1817	30S ribosomal protein S11	7	1.27845	0.0124393	Up
Biological Process	GO:0044260	5	cellular macromolecule metabolic process	1.51	0.183527	smr0011	smr0011 50S ribosomal protein L34	1	1.67694	0.000170423	Up
Biological Process	GO:0044249	4	cellular biosynthetic process	1.2	0.466233	sll1096	30S ribosomal protein S12	3	1.31906	0.0189003	Up
Biological Process	GO:0044249	4	cellular biosynthetic process	1.2	0.466233	sll0767	50S ribosomal protein L20	5	1.45848	0.000737967	Up
Biological Process	GO:0043170	4	macromolecule metabolic process	1.28	0.446246	smr0011	smr0011 50S ribosomal protein L34	1	1.67694	0.000170423	Up
Biological Process	GO:0043170	4	macromolecule metabolic process	1.28	0.446246	slr0955	probable tRNA/rRNA methyltransferase	10	1.50199	6.52e-05	Up
Biological Process	GO:0043170	4	macromolecule metabolic process	1.28	0.446246	sll1817	30S ribosomal protein S11	7	1.27845	0.0124393	Up
Biological Process	GO:0043170	4	macromolecule metabolic process	1.28	0.446246	sll1807	50S ribosomal protein L24	7	1.76663	0.000260519	Up
Biological Process	GO:0043170	4	macromolecule metabolic process	1.28	0.446246	sll1802	50S ribosomal protein L2	14	1.22687	0.00476438	Up
Biological Process	GO:0043170	4	macromolecule metabolic process	1.28	0.446246	sll1096	30S ribosomal protein S12	3	1.31906	0.0189003	Up
Biological Process	GO:0043170	4	macromolecule metabolic process	1.28	0.446246	sll0767	50S ribosomal protein L20	5	1.45848	0.000737967	Up
Biological Process	GO:0043170	4	macromolecule metabolic process	1.28	0.446246	sll0555	methionine aminopeptidase	4	1.24059	0.0121005	Up
Biological Process	GO:0016043	4	cellular component organization	1.49	0.440056	sll1817	30S ribosomal protein S11	7	1.27845	0.0124393	Up
Biological Process	GO:0016043	4	cellular component organization	1.49	0.440056	sll1802	50S ribosomal protein L2	14	1.22687	0.00476438	Up
Biological Process	GO:0044249	4	cellular biosynthetic process	1.2	0.466233	sll1802	50S ribosomal protein L2	14	1.22687	0.00476438	Up
Biological Process	GO:0016043	4	cellular component organization	1.49	0.440056	sll0767	50S ribosomal protein L20	5	1.45848	0.000737967	Up
Biological Process	GO:1901137	5	carbohydrate derivative biosynthetic process	1.53	0.431054	slr1882	riboflavin biosynthesis protein RibF	4	1.21063	0.0322916	Up
Biological Process	GO:1901137	5	carbohydrate derivative biosynthetic process	1.53	0.431054	slr0553	hypothetical protein	8	1.25944	0.00112341	Up
Biological Process	GO:0006163	9	purine nucleotide metabolic process	1.58	0.365582	ssl2615	sATP synthase C chain of CF(0)	1	1.26488	0.0383206	Up
Biological Process	GO:0006163	9	purine nucleotide metabolic process	1.58	0.365582	slr0553	hypothetical protein	8	1.25944	0.00112341	Up
Biological Process	GO:0006396	8	RNA processing	1.58	0.365582	slr0955	probable tRNA/rRNA methyltransferase	10	1.50199	6.52e-05	Up
Biological Process	GO:0006396	8	RNA processing	1.58	0.365582	sll1817	30S ribosomal protein S11	7	1.27845	0.0124393	Up
Biological Process	GO:0040007	2	growth	1.44	0.361865	slr0955	probable tRNA/rRNA methyltransferase	10	1.50199	6.52e-05	Up
Biological Process	GO:0040007	2	growth	1.44	0.361865	sll1817	30S ribosomal protein S11	7	1.27845	0.0124393	Up
Biological Process	GO:0040007	2	growth	1.44	0.361865	sll1807	50S ribosomal protein L24	7	1.76663	0.000260519	Up
Biological Process	GO:0040007	2	growth	1.44	0.361865	sll1802	50S ribosomal protein L2	14	1.22687	0.00476438	Up
Biological Process	GO:0040007	2	growth	1.44	0.361865	sll1096	30S ribosomal protein S12	3	1.31906	0.0189003	Up
Biological Process	GO:0034470	9	ncRNA processing	1.66	0.343726	slr0955	probable tRNA/rRNA methyltransferase	10	1.50199	6.52e-05	Up
Biological Process	GO:1901137	5	carbohydrate derivative biosynthetic process	1.53	0.431054	ssl2615	sATP synthase C chain of CF(0)	1	1.26488	0.0383206	Up
Biological Process	GO:0034470	9	ncRNA processing	1.66	0.343726	sll1817	30S ribosomal protein S11	7	1.27845	0.0124393	Up
Biological Process	GO:0044249	4	cellular biosynthetic process	1.2	0.466233	sll1807	50S ribosomal protein L24	7	1.76663	0.000260519	Up
Biological Process	GO:0044249	4	cellular biosynthetic process	1.2	0.466233	slr0553	hypothetical protein	8	1.25944	0.00112341	Up
Biological Process	GO:0071840	3	cellular component organization or biogenesis	1.45	0.499382	sll1802	50S ribosomal protein L2	14	1.22687	0.00476438	Up
Biological Process	GO:0071840	3	cellular component organization or biogenesis	1.45	0.499382	sll0767	50S ribosomal protein L20	5	1.45848	0.000737967	Up
Biological Process	GO:0009058	3	biosynthetic process	1.18	0.472313	ssl2615	sATP synthase C chain of CF(0)	1	1.26488	0.0383206	Up
Biological Process	GO:0009058	3	biosynthetic process	1.18	0.472313	smr0011	smr0011 50S ribosomal protein L34	1	1.67694	0.000170423	Up
Biological Process	GO:0009058	3	biosynthetic process	1.18	0.472313	slr1882	riboflavin biosynthesis protein RibF	4	1.21063	0.0322916	Up
Biological Process	GO:0009058	3	biosynthetic process	1.18	0.472313	slr1369	phosphatidate cytidylyltransferase	2	1.23817	0.00233829	Up
Biological Process	GO:0009058	3	biosynthetic process	1.18	0.472313	slr0553	hypothetical protein	8	1.25944	0.00112341	Up
Biological Process	GO:0009058	3	biosynthetic process	1.18	0.472313	sll1817	30S ribosomal protein S11	7	1.27845	0.0124393	Up
Biological Process	GO:0009058	3	biosynthetic process	1.18	0.472313	sll1807	50S ribosomal protein L24	7	1.76663	0.000260519	Up
Biological Process	GO:0009058	3	biosynthetic process	1.18	0.472313	sll1802	50S ribosomal protein L2	14	1.22687	0.00476438	Up
Biological Process	GO:0009058	3	biosynthetic process	1.18	0.472313	sll1096	30S ribosomal protein S12	3	1.31906	0.0189003	Up
Biological Process	GO:0009058	3	biosynthetic process	1.18	0.472313	sll0767	50S ribosomal protein L20	5	1.45848	0.000737967	Up
Biological Process	GO:0044249	4	cellular biosynthetic process	1.2	0.466233	sll1817	30S ribosomal protein S11	7	1.27845	0.0124393	Up
Biological Process	GO:1901576	4	organic substance biosynthetic process	1.2	0.466233	ssl2615	sATP synthase C chain of CF(0)	1	1.26488	0.0383206	Up
Biological Process	GO:1901576	4	organic substance biosynthetic process	1.2	0.466233	slr1882	riboflavin biosynthesis protein RibF	4	1.21063	0.0322916	Up
Biological Process	GO:1901576	4	organic substance biosynthetic process	1.2	0.466233	slr1369	phosphatidate cytidylyltransferase	2	1.23817	0.00233829	Up
Biological Process	GO:1901576	4	organic substance biosynthetic process	1.2	0.466233	slr0553	hypothetical protein	8	1.25944	0.00112341	Up
Biological Process	GO:1901576	4	organic substance biosynthetic process	1.2	0.466233	sll1817	30S ribosomal protein S11	7	1.27845	0.0124393	Up
Biological Process	GO:1901576	4	organic substance biosynthetic process	1.2	0.466233	sll1807	50S ribosomal protein L24	7	1.76663	0.000260519	Up
Biological Process	GO:1901576	4	organic substance biosynthetic process	1.2	0.466233	sll1802	50S ribosomal protein L2	14	1.22687	0.00476438	Up
Biological Process	GO:1901576	4	organic substance biosynthetic process	1.2	0.466233	sll1096	30S ribosomal protein S12	3	1.31906	0.0189003	Up
Biological Process	GO:1901576	4	organic substance biosynthetic process	1.2	0.466233	sll0767	50S ribosomal protein L20	5	1.45848	0.000737967	Up
Biological Process	GO:0044249	4	cellular biosynthetic process	1.2	0.466233	ssl2615	sATP synthase C chain of CF(0)	1	1.26488	0.0383206	Up
Biological Process	GO:0044249	4	cellular biosynthetic process	1.2	0.466233	smr0011	smr0011 50S ribosomal protein L34	1	1.67694	0.000170423	Up
Biological Process	GO:0044249	4	cellular biosynthetic process	1.2	0.466233	slr1882	riboflavin biosynthesis protein RibF	4	1.21063	0.0322916	Up
Biological Process	GO:0044249	4	cellular biosynthetic process	1.2	0.466233	slr1369	phosphatidate cytidylyltransferase	2	1.23817	0.00233829	Up
Biological Process	GO:1901576	4	organic substance biosynthetic process	1.2	0.466233	smr0011	smr0011 50S ribosomal protein L34	1	1.67694	0.000170423	Up
Biological Process	GO:0044260	5	cellular macromolecule metabolic process	1.51	0.183527	slr0955	probable tRNA/rRNA methyltransferase	10	1.50199	6.52e-05	Up
Biological Process	GO:0009150	10	purine ribonucleotide metabolic process	1.66	0.343726	ssl2615	sATP synthase C chain of CF(0)	1	1.26488	0.0383206	Up
Biological Process	GO:0016310	6	phosphorylation	1.7	0.332735	slr1882	riboflavin biosynthesis protein RibF	4	1.21063	0.0322916	Up
Biological Process	GO:0034641	4	cellular nitrogen compound metabolic process	1.33	0.221707	slr1882	riboflavin biosynthesis protein RibF	4	1.21063	0.0322916	Up
Biological Process	GO:0034641	4	cellular nitrogen compound metabolic process	1.33	0.221707	slr1369	phosphatidate cytidylyltransferase	2	1.23817	0.00233829	Up
Biological Process	GO:0034641	4	cellular nitrogen compound metabolic process	1.33	0.221707	slr0955	probable tRNA/rRNA methyltransferase	10	1.50199	6.52e-05	Up
Biological Process	GO:0034641	4	cellular nitrogen compound metabolic process	1.33	0.221707	slr0553	hypothetical protein	8	1.25944	0.00112341	Up
Biological Process	GO:0034641	4	cellular nitrogen compound metabolic process	1.33	0.221707	sll1817	30S ribosomal protein S11	7	1.27845	0.0124393	Up
Biological Process	GO:0034641	4	cellular nitrogen compound metabolic process	1.33	0.221707	sll1807	50S ribosomal protein L24	7	1.76663	0.000260519	Up
Biological Process	GO:0034641	4	cellular nitrogen compound metabolic process	1.33	0.221707	sll1802	50S ribosomal protein L2	14	1.22687	0.00476438	Up
Biological Process	GO:0034641	4	cellular nitrogen compound metabolic process	1.33	0.221707	sll1096	30S ribosomal protein S12	3	1.31906	0.0189003	Up
Biological Process	GO:0034641	4	cellular nitrogen compound metabolic process	1.33	0.221707	sll0767	50S ribosomal protein L20	5	1.45848	0.000737967	Up
Biological Process	GO:1901564	4	organonitrogen compound metabolic process	1.33	0.221707	ssl2615	sATP synthase C chain of CF(0)	1	1.26488	0.0383206	Up
Biological Process	GO:1901564	4	organonitrogen compound metabolic process	1.33	0.221707	smr0011	smr0011 50S ribosomal protein L34	1	1.67694	0.000170423	Up
Biological Process	GO:1901564	4	organonitrogen compound metabolic process	1.33	0.221707	slr1882	riboflavin biosynthesis protein RibF	4	1.21063	0.0322916	Up
Biological Process	GO:0034641	4	cellular nitrogen compound metabolic process	1.33	0.221707	smr0011	smr0011 50S ribosomal protein L34	1	1.67694	0.000170423	Up
Biological Process	GO:1901564	4	organonitrogen compound metabolic process	1.33	0.221707	slr1369	phosphatidate cytidylyltransferase	2	1.23817	0.00233829	Up
Biological Process	GO:1901564	4	organonitrogen compound metabolic process	1.33	0.221707	sll1817	30S ribosomal protein S11	7	1.27845	0.0124393	Up
Biological Process	GO:1901564	4	organonitrogen compound metabolic process	1.33	0.221707	sll1807	50S ribosomal protein L24	7	1.76663	0.000260519	Up
Biological Process	GO:1901564	4	organonitrogen compound metabolic process	1.33	0.221707	sll1802	50S ribosomal protein L2	14	1.22687	0.00476438	Up
Biological Process	GO:1901564	4	organonitrogen compound metabolic process	1.33	0.221707	sll1096	30S ribosomal protein S12	3	1.31906	0.0189003	Up
Biological Process	GO:1901564	4	organonitrogen compound metabolic process	1.33	0.221707	sll0767	50S ribosomal protein L20	5	1.45848	0.000737967	Up
Biological Process	GO:1901564	4	organonitrogen compound metabolic process	1.33	0.221707	sll0555	methionine aminopeptidase	4	1.24059	0.0121005	Up
Biological Process	GO:0022607	5	cellular component assembly	1.83	0.219929	sll1817	30S ribosomal protein S11	7	1.27845	0.0124393	Up
Biological Process	GO:0022607	5	cellular component assembly	1.83	0.219929	sll1802	50S ribosomal protein L2	14	1.22687	0.00476438	Up
Biological Process	GO:0022607	5	cellular component assembly	1.83	0.219929	sll0767	50S ribosomal protein L20	5	1.45848	0.000737967	Up
Biological Process	GO:0009259	9	ribonucleotide metabolic process	1.97	0.189142	ssl2615	sATP synthase C chain of CF(0)	1	1.26488	0.0383206	Up
Biological Process	GO:0009259	9	ribonucleotide metabolic process	1.97	0.189142	slr1882	riboflavin biosynthesis protein RibF	4	1.21063	0.0322916	Up
Biological Process	GO:0009259	9	ribonucleotide metabolic process	1.97	0.189142	slr0553	hypothetical protein	8	1.25944	0.00112341	Up
Biological Process	GO:1901564	4	organonitrogen compound metabolic process	1.33	0.221707	slr0553	hypothetical protein	8	1.25944	0.00112341	Up
Biological Process	GO:0009150	10	purine ribonucleotide metabolic process	1.66	0.343726	slr0553	hypothetical protein	8	1.25944	0.00112341	Up
Biological Process	GO:0034641	4	cellular nitrogen compound metabolic process	1.33	0.221707	ssl2615	sATP synthase C chain of CF(0)	1	1.26488	0.0383206	Up
Biological Process	GO:0019693	6	ribose phosphate metabolic process	1.8	0.227817	slr1882	riboflavin biosynthesis protein RibF	4	1.21063	0.0322916	Up
Biological Process	GO:0016310	6	phosphorylation	1.7	0.332735	slr0553	hypothetical protein	8	1.25944	0.00112341	Up
Biological Process	GO:0019637	5	organophosphate metabolic process	1.51	0.318861	ssl2615	sATP synthase C chain of CF(0)	1	1.26488	0.0383206	Up
Biological Process	GO:0019637	5	organophosphate metabolic process	1.51	0.318861	slr1882	riboflavin biosynthesis protein RibF	4	1.21063	0.0322916	Up
Biological Process	GO:0019637	5	organophosphate metabolic process	1.51	0.318861	slr1369	phosphatidate cytidylyltransferase	2	1.23817	0.00233829	Up
Biological Process	GO:0019637	5	organophosphate metabolic process	1.51	0.318861	slr0553	hypothetical protein	8	1.25944	0.00112341	Up
Biological Process	GO:0072522	6	purine-containing compound biosynthetic process	1.83	0.299597	ssl2615	sATP synthase C chain of CF(0)	1	1.26488	0.0383206	Up
Biological Process	GO:0072522	6	purine-containing compound biosynthetic process	1.83	0.299597	slr0553	hypothetical protein	8	1.25944	0.00112341	Up
Biological Process	GO:0006164	10	purine nucleotide biosynthetic process	1.88	0.288522	ssl2615	sATP synthase C chain of CF(0)	1	1.26488	0.0383206	Up
Biological Process	GO:0006164	10	purine nucleotide biosynthetic process	1.88	0.288522	slr0553	hypothetical protein	8	1.25944	0.00112341	Up
Biological Process	GO:0009152	11	purine ribonucleotide biosynthetic process	1.88	0.288522	ssl2615	sATP synthase C chain of CF(0)	1	1.26488	0.0383206	Up
Biological Process	GO:0009152	11	purine ribonucleotide biosynthetic process	1.88	0.288522	slr0553	hypothetical protein	8	1.25944	0.00112341	Up
Biological Process	GO:0044085	4	cellular component biogenesis	1.64	0.287097	slr0955	probable tRNA/rRNA methyltransferase	10	1.50199	6.52e-05	Up
Biological Process	GO:0019693	6	ribose phosphate metabolic process	1.8	0.227817	slr0553	hypothetical protein	8	1.25944	0.00112341	Up
Biological Process	GO:0044085	4	cellular component biogenesis	1.64	0.287097	sll1817	30S ribosomal protein S11	7	1.27845	0.0124393	Up
Biological Process	GO:0044085	4	cellular component biogenesis	1.64	0.287097	sll0767	50S ribosomal protein L20	5	1.45848	0.000737967	Up
Biological Process	GO:0055085	5	transmembrane transport	1.99	0.266379	ssl2615	sATP synthase C chain of CF(0)	1	1.26488	0.0383206	Up
Biological Process	GO:0055085	5	transmembrane transport	1.99	0.266379	sll0834	low affinity sulfate transporter	5	1.24753	0.00190778	Up
Biological Process	GO:0090407	6	organophosphate biosynthetic process	1.88	0.251599	ssl2615	sATP synthase C chain of CF(0)	1	1.26488	0.0383206	Up
Biological Process	GO:0090407	6	organophosphate biosynthetic process	1.88	0.251599	slr1882	riboflavin biosynthesis protein RibF	4	1.21063	0.0322916	Up
Biological Process	GO:0090407	6	organophosphate biosynthetic process	1.88	0.251599	slr1369	phosphatidate cytidylyltransferase	2	1.23817	0.00233829	Up
Biological Process	GO:0090407	6	organophosphate biosynthetic process	1.88	0.251599	slr0553	hypothetical protein	8	1.25944	0.00112341	Up
Biological Process	GO:0006753	7	nucleoside phosphate metabolic process	1.88	0.251599	ssl2615	sATP synthase C chain of CF(0)	1	1.26488	0.0383206	Up
Biological Process	GO:0006753	7	nucleoside phosphate metabolic process	1.88	0.251599	slr1882	riboflavin biosynthesis protein RibF	4	1.21063	0.0322916	Up
Biological Process	GO:0006753	7	nucleoside phosphate metabolic process	1.88	0.251599	slr1369	phosphatidate cytidylyltransferase	2	1.23817	0.00233829	Up
Biological Process	GO:0006753	7	nucleoside phosphate metabolic process	1.88	0.251599	slr0553	hypothetical protein	8	1.25944	0.00112341	Up
Biological Process	GO:0019693	6	ribose phosphate metabolic process	1.8	0.227817	ssl2615	sATP synthase C chain of CF(0)	1	1.26488	0.0383206	Up
Biological Process	GO:0044085	4	cellular component biogenesis	1.64	0.287097	sll1802	50S ribosomal protein L2	14	1.22687	0.00476438	Up
Biological Process	GO:0043603	5	cellular amide metabolic process	2.34	0.0303332	sll1096	30S ribosomal protein S12	3	1.31906	0.0189003	Up
Biological Process	GO:0071840	3	cellular component organization or biogenesis	1.45	0.499382	slr0955	probable tRNA/rRNA methyltransferase	10	1.50199	6.52e-05	Up
Biological Process	GO:0043604	6	amide biosynthetic process	2.4	0.0273143	smr0011	smr0011 50S ribosomal protein L34	1	1.67694	0.000170423	Up
Biological Process	GO:0010467	5	gene expression	2.22	0.0140214	sll1807	50S ribosomal protein L24	7	1.76663	0.000260519	Up
Biological Process	GO:0010467	5	gene expression	2.22	0.0140214	sll1802	50S ribosomal protein L2	14	1.22687	0.00476438	Up
Biological Process	GO:0010467	5	gene expression	2.22	0.0140214	sll1096	30S ribosomal protein S12	3	1.31906	0.0189003	Up
Biological Process	GO:0010467	5	gene expression	2.22	0.0140214	sll0767	50S ribosomal protein L20	5	1.45848	0.000737967	Up
Biological Process	GO:0010467	5	gene expression	2.22	0.0140214	sll0555	methionine aminopeptidase	4	1.24059	0.0121005	Up
Biological Process	GO:0043043	7	peptide biosynthetic process	2.78	0.0134626	smr0011	smr0011 50S ribosomal protein L34	1	1.67694	0.000170423	Up
Biological Process	GO:0043043	7	peptide biosynthetic process	2.78	0.0134626	sll1817	30S ribosomal protein S11	7	1.27845	0.0124393	Up
Biological Process	GO:0043043	7	peptide biosynthetic process	2.78	0.0134626	sll1807	50S ribosomal protein L24	7	1.76663	0.000260519	Up
Biological Process	GO:0043043	7	peptide biosynthetic process	2.78	0.0134626	sll1802	50S ribosomal protein L2	14	1.22687	0.00476438	Up
Biological Process	GO:0043043	7	peptide biosynthetic process	2.78	0.0134626	sll0767	50S ribosomal protein L20	5	1.45848	0.000737967	Up
Biological Process	GO:0006412	8	translation	2.82	0.0126048	smr0011	smr0011 50S ribosomal protein L34	1	1.67694	0.000170423	Up
Biological Process	GO:0006412	8	translation	2.82	0.0126048	sll1817	30S ribosomal protein S11	7	1.27845	0.0124393	Up
Biological Process	GO:0006412	8	translation	2.82	0.0126048	sll1807	50S ribosomal protein L24	7	1.76663	0.000260519	Up
Biological Process	GO:0006412	8	translation	2.82	0.0126048	sll1802	50S ribosomal protein L2	14	1.22687	0.00476438	Up
Biological Process	GO:0006412	8	translation	2.82	0.0126048	sll1096	30S ribosomal protein S12	3	1.31906	0.0189003	Up
Biological Process	GO:0006412	8	translation	2.82	0.0126048	sll0767	50S ribosomal protein L20	5	1.45848	0.000737967	Up
Biological Process	GO:0071840	3	cellular component organization or biogenesis	1.45	0.499382	sll1817	30S ribosomal protein S11	7	1.27845	0.0124393	Up
Biological Process	GO:0010467	5	gene expression	2.22	0.0140214	sll1817	30S ribosomal protein S11	7	1.27845	0.0124393	Up
Biological Process	GO:0010467	5	gene expression	2.22	0.0140214	slr0955	probable tRNA/rRNA methyltransferase	10	1.50199	6.52e-05	Up
Biological Process	GO:0043043	7	peptide biosynthetic process	2.78	0.0134626	sll1096	30S ribosomal protein S12	3	1.31906	0.0189003	Up
Biological Process	GO:0006518	6	peptide metabolic process	2.71	0.0153045	sll0767	50S ribosomal protein L20	5	1.45848	0.000737967	Up
Biological Process	GO:0043604	6	amide biosynthetic process	2.4	0.0273143	sll1817	30S ribosomal protein S11	7	1.27845	0.0124393	Up
Biological Process	GO:0010467	5	gene expression	2.22	0.0140214	smr0011	smr0011 50S ribosomal protein L34	1	1.67694	0.000170423	Up
Biological Process	GO:0043604	6	amide biosynthetic process	2.4	0.0273143	sll1807	50S ribosomal protein L24	7	1.76663	0.000260519	Up
Biological Process	GO:0043604	6	amide biosynthetic process	2.4	0.0273143	sll1802	50S ribosomal protein L2	14	1.22687	0.00476438	Up
Biological Process	GO:0043604	6	amide biosynthetic process	2.4	0.0273143	sll1096	30S ribosomal protein S12	3	1.31906	0.0189003	Up
Biological Process	GO:0044267	6	cellular protein metabolic process	2.19	0.0255503	smr0011	smr0011 50S ribosomal protein L34	1	1.67694	0.000170423	Up
Biological Process	GO:0044267	6	cellular protein metabolic process	2.19	0.0255503	sll1817	30S ribosomal protein S11	7	1.27845	0.0124393	Up
Biological Process	GO:0044267	6	cellular protein metabolic process	2.19	0.0255503	sll1807	50S ribosomal protein L24	7	1.76663	0.000260519	Up
Biological Process	GO:0043604	6	amide biosynthetic process	2.4	0.0273143	sll0767	50S ribosomal protein L20	5	1.45848	0.000737967	Up
Biological Process	GO:0044267	6	cellular protein metabolic process	2.19	0.0255503	sll1096	30S ribosomal protein S12	3	1.31906	0.0189003	Up
Biological Process	GO:0044267	6	cellular protein metabolic process	2.19	0.0255503	sll0767	50S ribosomal protein L20	5	1.45848	0.000737967	Up
Biological Process	GO:0044267	6	cellular protein metabolic process	2.19	0.0255503	sll0555	methionine aminopeptidase	4	1.24059	0.0121005	Up
Biological Process	GO:0006518	6	peptide metabolic process	2.71	0.0153045	smr0011	smr0011 50S ribosomal protein L34	1	1.67694	0.000170423	Up
Biological Process	GO:0006518	6	peptide metabolic process	2.71	0.0153045	sll1817	30S ribosomal protein S11	7	1.27845	0.0124393	Up
Biological Process	GO:0006518	6	peptide metabolic process	2.71	0.0153045	sll1807	50S ribosomal protein L24	7	1.76663	0.000260519	Up
Biological Process	GO:0044267	6	cellular protein metabolic process	2.19	0.0255503	sll1802	50S ribosomal protein L2	14	1.22687	0.00476438	Up
Biological Process	GO:0006518	6	peptide metabolic process	2.71	0.0153045	sll1802	50S ribosomal protein L2	14	1.22687	0.00476438	Up
Biological Process	GO:0006518	6	peptide metabolic process	2.71	0.0153045	sll1096	30S ribosomal protein S12	3	1.31906	0.0189003	Up
Cellular Component	GO:0022625	9	cytosolic large ribosomal subunit	4.47	0.0033445	ssl1426	s50S ribosomal protein L35	2	1.34871	0.00372151	Up
Cellular Component	GO:1990904	3	ribonucleoprotein complex	3.54	0.00175867	sll1817	30S ribosomal protein S11	7	1.27845	0.0124393	Up
Cellular Component	GO:1990904	3	ribonucleoprotein complex	3.54	0.00175867	smr0011	smr0011 50S ribosomal protein L34	1	1.67694	0.000170423	Up
Cellular Component	GO:1990904	3	ribonucleoprotein complex	3.54	0.00175867	ssl1426	s50S ribosomal protein L35	2	1.34871	0.00372151	Up
Cellular Component	GO:0022625	9	cytosolic large ribosomal subunit	4.47	0.0033445	sll1807	50S ribosomal protein L24	7	1.76663	0.000260519	Up
Cellular Component	GO:0022625	9	cytosolic large ribosomal subunit	4.47	0.0033445	sll1802	50S ribosomal protein L2	14	1.22687	0.00476438	Up
Cellular Component	GO:0022625	9	cytosolic large ribosomal subunit	4.47	0.0033445	smr0011	smr0011 50S ribosomal protein L34	1	1.67694	0.000170423	Up
Cellular Component	GO:1990904	3	ribonucleoprotein complex	3.54	0.00175867	sll1807	50S ribosomal protein L24	7	1.76663	0.000260519	Up
Cellular Component	GO:0022625	9	cytosolic large ribosomal subunit	4.47	0.0033445	sll0767	50S ribosomal protein L20	5	1.45848	0.000737967	Up
Cellular Component	GO:1990904	3	ribonucleoprotein complex	3.54	0.00175867	sll1802	50S ribosomal protein L2	14	1.22687	0.00476438	Up
Cellular Component	GO:0005840	6	ribosome	3.75	0.00122116	sll0767	50S ribosomal protein L20	5	1.45848	0.000737967	Up
Cellular Component	GO:1990904	3	ribonucleoprotein complex	3.54	0.00175867	sll0767	50S ribosomal protein L20	5	1.45848	0.000737967	Up
Cellular Component	GO:0005840	6	ribosome	3.75	0.00122116	ssl1426	s50S ribosomal protein L35	2	1.34871	0.00372151	Up
Cellular Component	GO:0005840	6	ribosome	3.75	0.00122116	smr0011	smr0011 50S ribosomal protein L34	1	1.67694	0.000170423	Up
Cellular Component	GO:0005840	6	ribosome	3.75	0.00122116	sll1817	30S ribosomal protein S11	7	1.27845	0.0124393	Up
Cellular Component	GO:0005840	6	ribosome	3.75	0.00122116	sll1807	50S ribosomal protein L24	7	1.76663	0.000260519	Up
Cellular Component	GO:0005840	6	ribosome	3.75	0.00122116	sll1802	50S ribosomal protein L2	14	1.22687	0.00476438	Up
Cellular Component	GO:0005840	6	ribosome	3.75	0.00122116	sll1096	30S ribosomal protein S12	3	1.31906	0.0189003	Up
Cellular Component	GO:0032991	2	protein-containing complex	2.42	0.000684755	ssl2615	sATP synthase C chain of CF(0)	1	1.26488	0.0383206	Up
Cellular Component	GO:0032991	2	protein-containing complex	2.42	0.000684755	ssl2598	sphotosystem II PsbH protein	2	2.13086	0.00129455	Up
Cellular Component	GO:0015934	8	large ribosomal subunit	4.47	0.0033445	sll0767	50S ribosomal protein L20	5	1.45848	0.000737967	Up
Cellular Component	GO:1990904	3	ribonucleoprotein complex	3.54	0.00175867	sll1096	30S ribosomal protein S12	3	1.31906	0.0189003	Up
Cellular Component	GO:0015934	8	large ribosomal subunit	4.47	0.0033445	sll1802	50S ribosomal protein L2	14	1.22687	0.00476438	Up
Cellular Component	GO:0098796	4	membrane protein complex	3.35	0.012096	ssl2598	sphotosystem II PsbH protein	2	2.13086	0.00129455	Up
Cellular Component	GO:0015934	8	large ribosomal subunit	4.47	0.0033445	smr0011	smr0011 50S ribosomal protein L34	1	1.67694	0.000170423	Up
Cellular Component	GO:0009523	6	photosystem II	5.03	0.0182666	ssl2598	sphotosystem II PsbH protein	2	2.13086	0.00129455	Up
Cellular Component	GO:0009523	6	photosystem II	5.03	0.0182666	smr0007	smr0007 photosystem II PsbL protein	1	2.09804	6.82e-05	Up
Cellular Component	GO:0009523	6	photosystem II	5.03	0.0182666	sml0007	sml0007 photosystem II protein Y	1	2.29539	0.000110615	Up
Cellular Component	GO:0098796	4	membrane protein complex	3.35	0.012096	ssl2615	sATP synthase C chain of CF(0)	1	1.26488	0.0383206	Up
Cellular Component	GO:0032991	2	protein-containing complex	2.42	0.000684755	ssl1426	s50S ribosomal protein L35	2	1.34871	0.00372151	Up
Cellular Component	GO:0098796	4	membrane protein complex	3.35	0.012096	smr0007	smr0007 photosystem II PsbL protein	1	2.09804	6.82e-05	Up
Cellular Component	GO:0098796	4	membrane protein complex	3.35	0.012096	sml0007	sml0007 photosystem II protein Y	1	2.29539	0.000110615	Up
Cellular Component	GO:0098796	4	membrane protein complex	3.35	0.012096	sll0522	NADH dehydrogenase subunit 4L	1	1.77588	0.000531271	Up
Cellular Component	GO:0044391	7	ribosomal subunit	3.28	0.00617248	ssl1426	s50S ribosomal protein L35	2	1.34871	0.00372151	Up
Cellular Component	GO:0044391	7	ribosomal subunit	3.28	0.00617248	smr0011	smr0011 50S ribosomal protein L34	1	1.67694	0.000170423	Up
Cellular Component	GO:0044391	7	ribosomal subunit	3.28	0.00617248	sll1817	30S ribosomal protein S11	7	1.27845	0.0124393	Up
Cellular Component	GO:0044391	7	ribosomal subunit	3.28	0.00617248	sll1807	50S ribosomal protein L24	7	1.76663	0.000260519	Up
Cellular Component	GO:0044391	7	ribosomal subunit	3.28	0.00617248	sll1802	50S ribosomal protein L2	14	1.22687	0.00476438	Up
Cellular Component	GO:0044391	7	ribosomal subunit	3.28	0.00617248	sll0767	50S ribosomal protein L20	5	1.45848	0.000737967	Up
Cellular Component	GO:0022626	7	cytosolic ribosome	3.35	0.00554825	ssl1426	s50S ribosomal protein L35	2	1.34871	0.00372151	Up
Cellular Component	GO:0022626	7	cytosolic ribosome	3.35	0.00554825	smr0011	smr0011 50S ribosomal protein L34	1	1.67694	0.000170423	Up
Cellular Component	GO:0022626	7	cytosolic ribosome	3.35	0.00554825	sll1817	30S ribosomal protein S11	7	1.27845	0.0124393	Up
Cellular Component	GO:0022626	7	cytosolic ribosome	3.35	0.00554825	sll1807	50S ribosomal protein L24	7	1.76663	0.000260519	Up
Cellular Component	GO:0022626	7	cytosolic ribosome	3.35	0.00554825	sll1802	50S ribosomal protein L2	14	1.22687	0.00476438	Up
Cellular Component	GO:0022626	7	cytosolic ribosome	3.35	0.00554825	sll0767	50S ribosomal protein L20	5	1.45848	0.000737967	Up
Cellular Component	GO:0015934	8	large ribosomal subunit	4.47	0.0033445	ssl1426	s50S ribosomal protein L35	2	1.34871	0.00372151	Up
Cellular Component	GO:0015934	8	large ribosomal subunit	4.47	0.0033445	sll1807	50S ribosomal protein L24	7	1.76663	0.000260519	Up
Cellular Component	GO:0032991	2	protein-containing complex	2.42	0.000684755	smr0011	smr0011 50S ribosomal protein L34	1	1.67694	0.000170423	Up
Cellular Component	GO:0043232	5	intracellular non-membrane-bounded organelle	3.35	0.000168498	ssl2598	sphotosystem II PsbH protein	2	2.13086	0.00129455	Up
Cellular Component	GO:0032991	2	protein-containing complex	2.42	0.000684755	sml0007	sml0007 photosystem II protein Y	1	2.29539	0.000110615	Up
Cellular Component	GO:0043226	3	organelle	3.28	7.72747e-05	ssl2598	sphotosystem II PsbH protein	2	2.13086	0.00129455	Up
Cellular Component	GO:0043226	3	organelle	3.28	7.72747e-05	ssl1426	s50S ribosomal protein L35	2	1.34871	0.00372151	Up
Cellular Component	GO:0043226	3	organelle	3.28	7.72747e-05	smr0011	smr0011 50S ribosomal protein L34	1	1.67694	0.000170423	Up
Cellular Component	GO:0043226	3	organelle	3.28	7.72747e-05	smr0007	smr0007 photosystem II PsbL protein	1	2.09804	6.82e-05	Up
Cellular Component	GO:0043226	3	organelle	3.28	7.72747e-05	sml0007	sml0007 photosystem II protein Y	1	2.29539	0.000110615	Up
Cellular Component	GO:0043226	3	organelle	3.28	7.72747e-05	slr1882	riboflavin biosynthesis protein RibF	4	1.21063	0.0322916	Up
Cellular Component	GO:0043226	3	organelle	3.28	7.72747e-05	sll1817	30S ribosomal protein S11	7	1.27845	0.0124393	Up
Cellular Component	GO:0043226	3	organelle	3.28	7.72747e-05	sll1807	50S ribosomal protein L24	7	1.76663	0.000260519	Up
Cellular Component	GO:0043226	3	organelle	3.28	7.72747e-05	sll1802	50S ribosomal protein L2	14	1.22687	0.00476438	Up
Cellular Component	GO:0043226	3	organelle	3.28	7.72747e-05	sll1096	30S ribosomal protein S12	3	1.31906	0.0189003	Up
Cellular Component	GO:0043226	3	organelle	3.28	7.72747e-05	sll0767	50S ribosomal protein L20	5	1.45848	0.000737967	Up
Cellular Component	GO:0043229	4	intracellular organelle	3.39	5.49209e-05	ssl2598	sphotosystem II PsbH protein	2	2.13086	0.00129455	Up
Cellular Component	GO:0043229	4	intracellular organelle	3.39	5.49209e-05	ssl1426	s50S ribosomal protein L35	2	1.34871	0.00372151	Up
Cellular Component	GO:0043229	4	intracellular organelle	3.39	5.49209e-05	smr0011	smr0011 50S ribosomal protein L34	1	1.67694	0.000170423	Up
Cellular Component	GO:0043229	4	intracellular organelle	3.39	5.49209e-05	smr0007	smr0007 photosystem II PsbL protein	1	2.09804	6.82e-05	Up
Cellular Component	GO:0043229	4	intracellular organelle	3.39	5.49209e-05	sml0007	sml0007 photosystem II protein Y	1	2.29539	0.000110615	Up
Cellular Component	GO:0043229	4	intracellular organelle	3.39	5.49209e-05	slr1882	riboflavin biosynthesis protein RibF	4	1.21063	0.0322916	Up
Cellular Component	GO:0043229	4	intracellular organelle	3.39	5.49209e-05	sll1817	30S ribosomal protein S11	7	1.27845	0.0124393	Up
Cellular Component	GO:0043229	4	intracellular organelle	3.39	5.49209e-05	sll1807	50S ribosomal protein L24	7	1.76663	0.000260519	Up
Cellular Component	GO:0043229	4	intracellular organelle	3.39	5.49209e-05	sll1802	50S ribosomal protein L2	14	1.22687	0.00476438	Up
Cellular Component	GO:0043229	4	intracellular organelle	3.39	5.49209e-05	sll1096	30S ribosomal protein S12	3	1.31906	0.0189003	Up
Cellular Component	GO:0043232	5	intracellular non-membrane-bounded organelle	3.35	0.000168498	sll0767	50S ribosomal protein L20	5	1.45848	0.000737967	Up
Cellular Component	GO:0043232	5	intracellular non-membrane-bounded organelle	3.35	0.000168498	sll1096	30S ribosomal protein S12	3	1.31906	0.0189003	Up
Cellular Component	GO:0043232	5	intracellular non-membrane-bounded organelle	3.35	0.000168498	sll1802	50S ribosomal protein L2	14	1.22687	0.00476438	Up
Cellular Component	GO:0043232	5	intracellular non-membrane-bounded organelle	3.35	0.000168498	sll1807	50S ribosomal protein L24	7	1.76663	0.000260519	Up
Cellular Component	GO:0032991	2	protein-containing complex	2.42	0.000684755	sll1817	30S ribosomal protein S11	7	1.27845	0.0124393	Up
Cellular Component	GO:0032991	2	protein-containing complex	2.42	0.000684755	sll1807	50S ribosomal protein L24	7	1.76663	0.000260519	Up
Cellular Component	GO:0032991	2	protein-containing complex	2.42	0.000684755	sll1802	50S ribosomal protein L2	14	1.22687	0.00476438	Up
Cellular Component	GO:0032991	2	protein-containing complex	2.42	0.000684755	sll1096	30S ribosomal protein S12	3	1.31906	0.0189003	Up
Cellular Component	GO:0032991	2	protein-containing complex	2.42	0.000684755	sll0767	50S ribosomal protein L20	5	1.45848	0.000737967	Up
Cellular Component	GO:0032991	2	protein-containing complex	2.42	0.000684755	sll0522	NADH dehydrogenase subunit 4L	1	1.77588	0.000531271	Up
Cellular Component	GO:0043228	4	non-membrane-bounded organelle	3.23	0.000234685	ssl2598	sphotosystem II PsbH protein	2	2.13086	0.00129455	Up
Cellular Component	GO:0043228	4	non-membrane-bounded organelle	3.23	0.000234685	ssl1426	s50S ribosomal protein L35	2	1.34871	0.00372151	Up
Cellular Component	GO:0043228	4	non-membrane-bounded organelle	3.23	0.000234685	smr0011	smr0011 50S ribosomal protein L34	1	1.67694	0.000170423	Up
Cellular Component	GO:0043228	4	non-membrane-bounded organelle	3.23	0.000234685	smr0007	smr0007 photosystem II PsbL protein	1	2.09804	6.82e-05	Up
Cellular Component	GO:0032991	2	protein-containing complex	2.42	0.000684755	smr0007	smr0007 photosystem II PsbL protein	1	2.09804	6.82e-05	Up
Cellular Component	GO:0043228	4	non-membrane-bounded organelle	3.23	0.000234685	sml0007	sml0007 photosystem II protein Y	1	2.29539	0.000110615	Up
Cellular Component	GO:0043228	4	non-membrane-bounded organelle	3.23	0.000234685	sll1807	50S ribosomal protein L24	7	1.76663	0.000260519	Up
Cellular Component	GO:0043228	4	non-membrane-bounded organelle	3.23	0.000234685	sll1802	50S ribosomal protein L2	14	1.22687	0.00476438	Up
Cellular Component	GO:0043228	4	non-membrane-bounded organelle	3.23	0.000234685	sll1096	30S ribosomal protein S12	3	1.31906	0.0189003	Up
Cellular Component	GO:0043228	4	non-membrane-bounded organelle	3.23	0.000234685	sll0767	50S ribosomal protein L20	5	1.45848	0.000737967	Up
Cellular Component	GO:0030096	7	plasma membrane-derived thylakoid photosystem II	5.03	0.0182666	sml0007	sml0007 photosystem II protein Y	1	2.29539	0.000110615	Up
Cellular Component	GO:0043232	5	intracellular non-membrane-bounded organelle	3.35	0.000168498	ssl1426	s50S ribosomal protein L35	2	1.34871	0.00372151	Up
Cellular Component	GO:0043232	5	intracellular non-membrane-bounded organelle	3.35	0.000168498	smr0011	smr0011 50S ribosomal protein L34	1	1.67694	0.000170423	Up
Cellular Component	GO:0043232	5	intracellular non-membrane-bounded organelle	3.35	0.000168498	smr0007	smr0007 photosystem II PsbL protein	1	2.09804	6.82e-05	Up
Cellular Component	GO:0043232	5	intracellular non-membrane-bounded organelle	3.35	0.000168498	sml0007	sml0007 photosystem II protein Y	1	2.29539	0.000110615	Up
Cellular Component	GO:0043232	5	intracellular non-membrane-bounded organelle	3.35	0.000168498	sll1817	30S ribosomal protein S11	7	1.27845	0.0124393	Up
Cellular Component	GO:0043228	4	non-membrane-bounded organelle	3.23	0.000234685	sll1817	30S ribosomal protein S11	7	1.27845	0.0124393	Up
Cellular Component	GO:0030096	7	plasma membrane-derived thylakoid photosystem II	5.03	0.0182666	smr0007	smr0007 photosystem II PsbL protein	1	2.09804	6.82e-05	Up
Cellular Component	GO:0016020	3	membrane	1.42	0.107828	slr1882	riboflavin biosynthesis protein RibF	4	1.21063	0.0322916	Up
Cellular Component	GO:0098797	5	plasma membrane protein complex	3.15	0.0316699	sll0522	NADH dehydrogenase subunit 4L	1	1.77588	0.000531271	Up
Cellular Component	GO:0005886	4	plasma membrane	1.21	0.490576	sll0522	NADH dehydrogenase subunit 4L	1	1.77588	0.000531271	Up
Cellular Component	GO:0005886	4	plasma membrane	1.21	0.490576	sll0533	trigger factor	20	1.3008	0.00133717	Up
Cellular Component	GO:0005886	4	plasma membrane	1.21	0.490576	sll0555	methionine aminopeptidase	4	1.24059	0.0121005	Up
Cellular Component	GO:0005886	4	plasma membrane	1.21	0.490576	sll0767	50S ribosomal protein L20	5	1.45848	0.000737967	Up
Cellular Component	GO:0005886	4	plasma membrane	1.21	0.490576	sll0834	low affinity sulfate transporter	5	1.24753	0.00190778	Up
Cellular Component	GO:0005886	4	plasma membrane	1.21	0.490576	sll1802	50S ribosomal protein L2	14	1.22687	0.00476438	Up
Cellular Component	GO:0005886	4	plasma membrane	1.21	0.490576	sll1817	30S ribosomal protein S11	7	1.27845	0.0124393	Up
Cellular Component	GO:0005886	4	plasma membrane	1.21	0.490576	sml0007	sml0007 photosystem II protein Y	1	2.29539	0.000110615	Up
Cellular Component	GO:0005886	4	plasma membrane	1.21	0.490576	smr0007	smr0007 photosystem II PsbL protein	1	2.09804	6.82e-05	Up
Cellular Component	GO:0005886	4	plasma membrane	1.21	0.490576	ssl2598	sphotosystem II PsbH protein	2	2.13086	0.00129455	Up
Cellular Component	GO:0009579	3	thylakoid	1.96	0.19093	ssl2598	sphotosystem II PsbH protein	2	2.13086	0.00129455	Up
Cellular Component	GO:0071944	3	cell periphery	1.19	0.495315	sll0522	NADH dehydrogenase subunit 4L	1	1.77588	0.000531271	Up
Cellular Component	GO:0071944	3	cell periphery	1.19	0.495315	sll0555	methionine aminopeptidase	4	1.24059	0.0121005	Up
Cellular Component	GO:0071944	3	cell periphery	1.19	0.495315	sll0767	50S ribosomal protein L20	5	1.45848	0.000737967	Up
Cellular Component	GO:0071944	3	cell periphery	1.19	0.495315	sll0834	low affinity sulfate transporter	5	1.24753	0.00190778	Up
Cellular Component	GO:0071944	3	cell periphery	1.19	0.495315	sll1802	50S ribosomal protein L2	14	1.22687	0.00476438	Up
Cellular Component	GO:0071944	3	cell periphery	1.19	0.495315	sll1807	50S ribosomal protein L24	7	1.76663	0.000260519	Up
Cellular Component	GO:0071944	3	cell periphery	1.19	0.495315	sll1817	30S ribosomal protein S11	7	1.27845	0.0124393	Up
Cellular Component	GO:0071944	3	cell periphery	1.19	0.495315	sml0007	sml0007 photosystem II protein Y	1	2.29539	0.000110615	Up
Cellular Component	GO:0071944	3	cell periphery	1.19	0.495315	smr0007	smr0007 photosystem II PsbL protein	1	2.09804	6.82e-05	Up
Cellular Component	GO:0071944	3	cell periphery	1.19	0.495315	ssl2598	sphotosystem II PsbH protein	2	2.13086	0.00129455	Up
Cellular Component	GO:0030096	7	plasma membrane-derived thylakoid photosystem II	5.03	0.0182666	ssl2598	sphotosystem II PsbH protein	2	2.13086	0.00129455	Up
Cellular Component	GO:0071944	3	cell periphery	1.19	0.495315	sll0533	trigger factor	20	1.3008	0.00133717	Up
Cellular Component	GO:0009579	3	thylakoid	1.96	0.19093	smr0007	smr0007 photosystem II PsbL protein	1	2.09804	6.82e-05	Up
Cellular Component	GO:0043229	4	intracellular organelle	3.39	5.49209e-05	sll0767	50S ribosomal protein L20	5	1.45848	0.000737967	Up
Cellular Component	GO:0034357	4	photosynthetic membrane	2.12	0.162279	ssl2598	sphotosystem II PsbH protein	2	2.13086	0.00129455	Up
Cellular Component	GO:0009579	3	thylakoid	1.96	0.19093	sml0007	sml0007 photosystem II protein Y	1	2.29539	0.000110615	Up
Cellular Component	GO:0098797	5	plasma membrane protein complex	3.15	0.0316699	smr0007	smr0007 photosystem II PsbL protein	1	2.09804	6.82e-05	Up
Cellular Component	GO:0098797	5	plasma membrane protein complex	3.15	0.0316699	ssl2598	sphotosystem II PsbH protein	2	2.13086	0.00129455	Up
Cellular Component	GO:0009521	5	photosystem	3.65	0.0434678	sml0007	sml0007 photosystem II protein Y	1	2.29539	0.000110615	Up
Cellular Component	GO:0009521	5	photosystem	3.65	0.0434678	smr0007	smr0007 photosystem II PsbL protein	1	2.09804	6.82e-05	Up
Cellular Component	GO:0009521	5	photosystem	3.65	0.0434678	ssl2598	sphotosystem II PsbH protein	2	2.13086	0.00129455	Up
Cellular Component	GO:0030075	6	bacterial thylakoid	3.65	0.0434678	sml0007	sml0007 photosystem II protein Y	1	2.29539	0.000110615	Up
Cellular Component	GO:0030075	6	bacterial thylakoid	3.65	0.0434678	smr0007	smr0007 photosystem II PsbL protein	1	2.09804	6.82e-05	Up
Cellular Component	GO:0030075	6	bacterial thylakoid	3.65	0.0434678	ssl2598	sphotosystem II PsbH protein	2	2.13086	0.00129455	Up
Cellular Component	GO:0016020	3	membrane	1.42	0.107828	sll0522	NADH dehydrogenase subunit 4L	1	1.77588	0.000531271	Up
Cellular Component	GO:0016020	3	membrane	1.42	0.107828	sll0533	trigger factor	20	1.3008	0.00133717	Up
Cellular Component	GO:0098797	5	plasma membrane protein complex	3.15	0.0316699	sml0007	sml0007 photosystem II protein Y	1	2.29539	0.000110615	Up
Cellular Component	GO:0016020	3	membrane	1.42	0.107828	sll0767	50S ribosomal protein L20	5	1.45848	0.000737967	Up
Cellular Component	GO:0016020	3	membrane	1.42	0.107828	sll0834	low affinity sulfate transporter	5	1.24753	0.00190778	Up
Cellular Component	GO:0016020	3	membrane	1.42	0.107828	sll1802	50S ribosomal protein L2	14	1.22687	0.00476438	Up
Cellular Component	GO:0016020	3	membrane	1.42	0.107828	sll1817	30S ribosomal protein S11	7	1.27845	0.0124393	Up
Cellular Component	GO:0016020	3	membrane	1.42	0.107828	slr1369	phosphatidate cytidylyltransferase	2	1.23817	0.00233829	Up
Cellular Component	GO:0016020	3	membrane	1.42	0.107828	sml0007	sml0007 photosystem II protein Y	1	2.29539	0.000110615	Up
Cellular Component	GO:0016020	3	membrane	1.42	0.107828	smr0007	smr0007 photosystem II PsbL protein	1	2.09804	6.82e-05	Up
Cellular Component	GO:0016020	3	membrane	1.42	0.107828	ssl2598	sphotosystem II PsbH protein	2	2.13086	0.00129455	Up
Cellular Component	GO:0016020	3	membrane	1.42	0.107828	ssl2615	sATP synthase C chain of CF(0)	1	1.26488	0.0383206	Up
Cellular Component	GO:0034357	4	photosynthetic membrane	2.12	0.162279	sml0007	sml0007 photosystem II protein Y	1	2.29539	0.000110615	Up
Cellular Component	GO:0034357	4	photosynthetic membrane	2.12	0.162279	smr0007	smr0007 photosystem II PsbL protein	1	2.09804	6.82e-05	Up
Cellular Component	GO:0016020	3	membrane	1.42	0.107828	sll0555	methionine aminopeptidase	4	1.24059	0.0121005	Up
Molecular Function	GO:0016301	5	kinase activity	1.87	0.289957	slr0553	hypothetical protein	8	1.25944	0.00112341	Up
Molecular Function	GO:0022857	3	transmembrane transporter activity	2.45	0.194225	ssl2615	sATP synthase C chain of CF(0)	1	1.26488	0.0383206	Up
Molecular Function	GO:0022857	3	transmembrane transporter activity	2.45	0.194225	sll0834	low affinity sulfate transporter	5	1.24753	0.00190778	Up
Molecular Function	GO:0003723	5	RNA binding	2.39	0.123771	sll1817	30S ribosomal protein S11	7	1.27845	0.0124393	Up
Molecular Function	GO:0046914	6	transition metal ion binding	2.33	0.130924	sll1802	50S ribosomal protein L2	14	1.22687	0.00476438	Up
Molecular Function	GO:0046914	6	transition metal ion binding	2.33	0.130924	sll0555	methionine aminopeptidase	4	1.24059	0.0121005	Up
Molecular Function	GO:0008270	7	zinc ion binding	3.18	0.126768	slr1882	riboflavin biosynthesis protein RibF	4	1.21063	0.0322916	Up
Molecular Function	GO:0008270	7	zinc ion binding	3.18	0.126768	sll1802	50S ribosomal protein L2	14	1.22687	0.00476438	Up
Molecular Function	GO:0046914	6	transition metal ion binding	2.33	0.130924	slr1882	riboflavin biosynthesis protein RibF	4	1.21063	0.0322916	Up
Molecular Function	GO:0016301	5	kinase activity	1.87	0.289957	slr1882	riboflavin biosynthesis protein RibF	4	1.21063	0.0322916	Up
Molecular Function	GO:0003676	4	nucleic acid binding	1.49	0.440143	sll1817	30S ribosomal protein S11	7	1.27845	0.0124393	Up
Molecular Function	GO:0005215	2	transporter activity	1.77	0.314114	ssl2615	sATP synthase C chain of CF(0)	1	1.26488	0.0383206	Up
Molecular Function	GO:0003676	4	nucleic acid binding	1.49	0.440143	sll0767	50S ribosomal protein L20	5	1.45848	0.000737967	Up
Molecular Function	GO:0003676	4	nucleic acid binding	1.49	0.440143	sll1802	50S ribosomal protein L2	14	1.22687	0.00476438	Up
Molecular Function	GO:0046872	5	metal ion binding	1.47	0.445253	sll0555	methionine aminopeptidase	4	1.24059	0.0121005	Up
Molecular Function	GO:0046872	5	metal ion binding	1.47	0.445253	sll1802	50S ribosomal protein L2	14	1.22687	0.00476438	Up
Molecular Function	GO:0046872	5	metal ion binding	1.47	0.445253	slr1882	riboflavin biosynthesis protein RibF	4	1.21063	0.0322916	Up
Molecular Function	GO:0043169	4	cation binding	1.43	0.455905	sll0555	methionine aminopeptidase	4	1.24059	0.0121005	Up
Molecular Function	GO:0043169	4	cation binding	1.43	0.455905	sll1802	50S ribosomal protein L2	14	1.22687	0.00476438	Up
Molecular Function	GO:0043169	4	cation binding	1.43	0.455905	slr1882	riboflavin biosynthesis protein RibF	4	1.21063	0.0322916	Up
Molecular Function	GO:0003723	5	RNA binding	2.39	0.123771	sll1802	50S ribosomal protein L2	14	1.22687	0.00476438	Up
Molecular Function	GO:0005215	2	transporter activity	1.77	0.314114	sll0834	low affinity sulfate transporter	5	1.24753	0.00190778	Up
Molecular Function	GO:0003723	5	RNA binding	2.39	0.123771	sll0767	50S ribosomal protein L20	5	1.45848	0.000737967	Up
Molecular Function	GO:0050136	6	NADH dehydrogenase (quinone) activity	12.73	0.00882325	sll0522	NADH dehydrogenase subunit 4L	1	1.77588	0.000531271	Up
Molecular Function	GO:0019843	6	rRNA binding	3.54	0.105923	sll0767	50S ribosomal protein L20	5	1.45848	0.000737967	Up
Molecular Function	GO:0003735	3	structural constituent of ribosome	4.06	0.00193108	sll1096	30S ribosomal protein S12	3	1.31906	0.0189003	Up
Molecular Function	GO:0003735	3	structural constituent of ribosome	4.06	0.00193108	sll1802	50S ribosomal protein L2	14	1.22687	0.00476438	Up
Molecular Function	GO:0003735	3	structural constituent of ribosome	4.06	0.00193108	sll1817	30S ribosomal protein S11	7	1.27845	0.0124393	Up
Molecular Function	GO:0003735	3	structural constituent of ribosome	4.06	0.00193108	smr0011	smr0011 50S ribosomal protein L34	1	1.67694	0.000170423	Up
Molecular Function	GO:0003735	3	structural constituent of ribosome	4.06	0.00193108	ssl1426	s50S ribosomal protein L35	2	1.34871	0.00372151	Up
Molecular Function	GO:0005198	2	structural molecule activity	4.06	0.00193108	sll0767	50S ribosomal protein L20	5	1.45848	0.000737967	Up
Molecular Function	GO:0005198	2	structural molecule activity	4.06	0.00193108	sll1096	30S ribosomal protein S12	3	1.31906	0.0189003	Up
Molecular Function	GO:0005198	2	structural molecule activity	4.06	0.00193108	sll1802	50S ribosomal protein L2	14	1.22687	0.00476438	Up
Molecular Function	GO:0005198	2	structural molecule activity	4.06	0.00193108	sll1817	30S ribosomal protein S11	7	1.27845	0.0124393	Up
Molecular Function	GO:0005198	2	structural molecule activity	4.06	0.00193108	smr0011	smr0011 50S ribosomal protein L34	1	1.67694	0.000170423	Up
Molecular Function	GO:0019843	6	rRNA binding	3.54	0.105923	sll1817	30S ribosomal protein S11	7	1.27845	0.0124393	Up
Molecular Function	GO:0005198	2	structural molecule activity	4.06	0.00193108	ssl1426	s50S ribosomal protein L35	2	1.34871	0.00372151	Up
Molecular Function	GO:0008137	7	NADH dehydrogenase (ubiquinone) activity	12.73	0.00882325	sll0223	NADH dehydrogenase subunit 2	2	1.2651	0.00446369	Up
Molecular Function	GO:0008137	7	NADH dehydrogenase (ubiquinone) activity	12.73	0.00882325	sll0522	NADH dehydrogenase subunit 4L	1	1.77588	0.000531271	Up
Molecular Function	GO:0003954	5	NADH dehydrogenase activity	10.61	0.0129885	sll0223	NADH dehydrogenase subunit 2	2	1.2651	0.00446369	Up
Molecular Function	GO:0003954	5	NADH dehydrogenase activity	10.61	0.0129885	sll0522	NADH dehydrogenase subunit 4L	1	1.77588	0.000531271	Up
Molecular Function	GO:0003729	6	mRNA binding	7.96	0.0233522	sll0767	50S ribosomal protein L20	5	1.45848	0.000737967	Up
Molecular Function	GO:0003729	6	mRNA binding	7.96	0.0233522	sll1817	30S ribosomal protein S11	7	1.27845	0.0124393	Up
Molecular Function	GO:0015075	4	ion transmembrane transporter activity	3.75	0.0959128	sll0834	low affinity sulfate transporter	5	1.24753	0.00190778	Up
Molecular Function	GO:0015075	4	ion transmembrane transporter activity	3.75	0.0959128	ssl2615	sATP synthase C chain of CF(0)	1	1.26488	0.0383206	Up
Molecular Function	GO:0016651	4	oxidoreductase activity, acting on NAD(P)H	3.75	0.0959128	sll0223	NADH dehydrogenase subunit 2	2	1.2651	0.00446369	Up
Molecular Function	GO:0016651	4	oxidoreductase activity, acting on NAD(P)H	3.75	0.0959128	sll0522	NADH dehydrogenase subunit 4L	1	1.77588	0.000531271	Up
Molecular Function	GO:0050136	6	NADH dehydrogenase (quinone) activity	12.73	0.00882325	sll0223	NADH dehydrogenase subunit 2	2	1.2651	0.00446369	Up
Molecular Function	GO:0003735	3	structural constituent of ribosome	4.06	0.00193108	sll0767	50S ribosomal protein L20	5	1.45848	0.000737967	Up

## Sheet: Table S8B
Table S8B. GO enrichment of down-regulated DEPs in Synechocystis sp. PCC 6803
GO Terms Level 1	GO Terms ID	GO Terms Level	GO Terms Description	Fold Enrichment	Fisher's exact test p value	Protein accession	Protein description	Peptide counts (all)	ClpX/WT Ratio	ClpX/WT P value	Regulated Type
Biological Process	GO:0016310	6	phosphorylation	3.6	0.0439872	slr1672	glycerol kinase	11	0.397686	0.000187582	Down
Biological Process	GO:0033554	4	cellular response to stress	3.44	0.0497386	sll0247	iron-stress chlorophyll-binding protein, homologous to psbC (CP43)	3	0.653217	0.00314665	Down
Biological Process	GO:0033554	4	cellular response to stress	3.44	0.0497386	sll0754	ribosome binding factor A	7	0.825081	0.00228797	Down
Biological Process	GO:0033554	4	cellular response to stress	3.44	0.0497386	sll0896	Holliday juction resolvase RuvC	1	0.796963	0.012996	Down
Biological Process	GO:0044262	5	cellular carbohydrate metabolic process	4.28	0.0754513	slr1420	probable sugar kinase	3	0.267051	0.000217162	Down
Biological Process	GO:0044262	5	cellular carbohydrate metabolic process	4.28	0.0754513	slr1672	glycerol kinase	11	0.397686	0.000187582	Down
Biological Process	GO:0051716	3	cellular response to stimulus	2.69	0.0917698	sll0247	iron-stress chlorophyll-binding protein, homologous to psbC (CP43)	3	0.653217	0.00314665	Down
Biological Process	GO:0051716	3	cellular response to stimulus	2.69	0.0917698	sll0754	ribosome binding factor A	7	0.825081	0.00228797	Down
Biological Process	GO:0051716	3	cellular response to stimulus	2.69	0.0917698	sll0896	Holliday juction resolvase RuvC	1	0.796963	0.012996	Down
Biological Process	GO:0006974	5	cellular response to DNA damage stimulus	3.79	0.0936878	sll0754	ribosome binding factor A	7	0.825081	0.00228797	Down
Biological Process	GO:0006974	5	cellular response to DNA damage stimulus	3.79	0.0936878	sll0896	Holliday juction resolvase RuvC	1	0.796963	0.012996	Down
Biological Process	GO:0009605	3	response to external stimulus	3.52	0.106529	sll0247	iron-stress chlorophyll-binding protein, homologous to psbC (CP43)	3	0.653217	0.00314665	Down
Biological Process	GO:0009605	3	response to external stimulus	3.52	0.106529	sll1536	molybdopterin biosynthesis MoeB protein	13	0.816925	0.00571323	Down
Biological Process	GO:0009108	6	coenzyme biosynthetic process	2.1	0.246005	sll1536	molybdopterin biosynthesis MoeB protein	13	0.816925	0.00571323	Down
Biological Process	GO:0009108	6	coenzyme biosynthetic process	2.1	0.246005	slr1945	2,3-bisphosphoglycerate-independent phosphoglycerate mutase	13	0.816149	0.000163232	Down
Biological Process	GO:0016310	6	phosphorylation	3.6	0.0439872	slr1945	2,3-bisphosphoglycerate-independent phosphoglycerate mutase	13	0.816149	0.000163232	Down
Biological Process	GO:0051234	3	establishment of localization	2.05	0.253843	sll0679	periplasmic phosphate-binding protein of ABC transporter	13	0.558463	3.89e-05	Down
Biological Process	GO:0006810	4	transport	2.05	0.253843	sll0679	periplasmic phosphate-binding protein of ABC transporter	13	0.558463	3.89e-05	Down
Biological Process	GO:0006810	4	transport	2.05	0.253843	slr1651	ABC transporter ATP-binding protein	1	0.568468	0.00325447	Down
Biological Process	GO:0006796	5	phosphate-containing compound metabolic process	1.73	0.25933	sll1536	molybdopterin biosynthesis MoeB protein	13	0.816925	0.00571323	Down
Biological Process	GO:0006796	5	phosphate-containing compound metabolic process	1.73	0.25933	slr1420	probable sugar kinase	3	0.267051	0.000217162	Down
Biological Process	GO:0006796	5	phosphate-containing compound metabolic process	1.73	0.25933	slr1672	glycerol kinase	11	0.397686	0.000187582	Down
Biological Process	GO:0006796	5	phosphate-containing compound metabolic process	1.73	0.25933	slr1945	2,3-bisphosphoglycerate-independent phosphoglycerate mutase	13	0.816149	0.000163232	Down
Biological Process	GO:0006793	4	phosphorus metabolic process	1.7	0.26442	sll1536	molybdopterin biosynthesis MoeB protein	13	0.816925	0.00571323	Down
Biological Process	GO:0006793	4	phosphorus metabolic process	1.7	0.26442	slr1420	probable sugar kinase	3	0.267051	0.000217162	Down
Biological Process	GO:0006793	4	phosphorus metabolic process	1.7	0.26442	slr1672	glycerol kinase	11	0.397686	0.000187582	Down
Biological Process	GO:0006793	4	phosphorus metabolic process	1.7	0.26442	slr1945	2,3-bisphosphoglycerate-independent phosphoglycerate mutase	13	0.816149	0.000163232	Down
Biological Process	GO:0051179	2	localization	1.93	0.277461	sll0679	periplasmic phosphate-binding protein of ABC transporter	13	0.558463	3.89e-05	Down
Biological Process	GO:0051179	2	localization	1.93	0.277461	slr1651	ABC transporter ATP-binding protein	1	0.568468	0.00325447	Down
Biological Process	GO:0006732	5	coenzyme metabolic process	1.79	0.309059	sll1536	molybdopterin biosynthesis MoeB protein	13	0.816925	0.00571323	Down
Biological Process	GO:0006732	5	coenzyme metabolic process	1.79	0.309059	slr1945	2,3-bisphosphoglycerate-independent phosphoglycerate mutase	13	0.816149	0.000163232	Down
Biological Process	GO:0051234	3	establishment of localization	2.05	0.253843	slr1651	ABC transporter ATP-binding protein	1	0.568468	0.00325447	Down
Biological Process	GO:0051188	5	cofactor biosynthetic process	1.67	0.340598	sll1536	molybdopterin biosynthesis MoeB protein	13	0.816925	0.00571323	Down
Biological Process	GO:0051188	5	cofactor biosynthetic process	1.67	0.340598	slr1945	2,3-bisphosphoglycerate-independent phosphoglycerate mutase	13	0.816149	0.000163232	Down
Biological Process	GO:0005975	4	carbohydrate metabolic process	3.79	0.0386087	slr1945	2,3-bisphosphoglycerate-independent phosphoglycerate mutase	13	0.816149	0.000163232	Down
Biological Process	GO:0044117	4	growth of symbiont in host	49.25	6.42716e-06	sll0681	phosphate transport system permease protein PstC homolog	3	0.509139	0.0108182	Down
Biological Process	GO:0044117	4	growth of symbiont in host	49.25	6.42716e-06	sll0682	phosphate transport system permease protein PstA homolog	1	0.219404	0.000130626	Down
Biological Process	GO:0044117	4	growth of symbiont in host	49.25	6.42716e-06	slr1248	phosphate transport system permease protein PstC homolog	3	0.559516	0.000163714	Down
Biological Process	GO:0044110	3	growth involved in symbiotic interaction	49.25	6.42716e-06	sll0681	phosphate transport system permease protein PstC homolog	3	0.509139	0.0108182	Down
Biological Process	GO:0044110	3	growth involved in symbiotic interaction	49.25	6.42716e-06	sll0682	phosphate transport system permease protein PstA homolog	1	0.219404	0.000130626	Down
Biological Process	GO:0044110	3	growth involved in symbiotic interaction	49.25	6.42716e-06	slr1248	phosphate transport system permease protein PstC homolog	3	0.559516	0.000163714	Down
Biological Process	GO:0044403	3	symbiotic process	13.13	0.000118958	sll0681	phosphate transport system permease protein PstC homolog	3	0.509139	0.0108182	Down
Biological Process	GO:0044403	3	symbiotic process	13.13	0.000118958	sll0682	phosphate transport system permease protein PstA homolog	1	0.219404	0.000130626	Down
Biological Process	GO:0044403	3	symbiotic process	13.13	0.000118958	sll1536	molybdopterin biosynthesis MoeB protein	13	0.816925	0.00571323	Down
Biological Process	GO:0044403	3	symbiotic process	13.13	0.000118958	slr1248	phosphate transport system permease protein PstC homolog	3	0.559516	0.000163714	Down
Biological Process	GO:0044419	2	interspecies interaction between organisms	12.31	0.000156863	sll0681	phosphate transport system permease protein PstC homolog	3	0.509139	0.0108182	Down
Biological Process	GO:0044419	2	interspecies interaction between organisms	12.31	0.000156863	sll0682	phosphate transport system permease protein PstA homolog	1	0.219404	0.000130626	Down
Biological Process	GO:0044419	2	interspecies interaction between organisms	12.31	0.000156863	sll1536	molybdopterin biosynthesis MoeB protein	13	0.816925	0.00571323	Down
Biological Process	GO:0016310	6	phosphorylation	3.6	0.0439872	slr1420	probable sugar kinase	3	0.267051	0.000217162	Down
Biological Process	GO:0044419	2	interspecies interaction between organisms	12.31	0.000156863	slr1248	phosphate transport system permease protein PstC homolog	3	0.559516	0.000163714	Down
Biological Process	GO:0051704	2	multi-organism process	10.37	0.000323125	sll0682	phosphate transport system permease protein PstA homolog	1	0.219404	0.000130626	Down
Biological Process	GO:0005975	4	carbohydrate metabolic process	3.79	0.0386087	slr1672	glycerol kinase	11	0.397686	0.000187582	Down
Biological Process	GO:0005975	4	carbohydrate metabolic process	3.79	0.0386087	slr1420	probable sugar kinase	3	0.267051	0.000217162	Down
Biological Process	GO:0006950	3	response to stress	2.98	0.0352297	slr1945	2,3-bisphosphoglycerate-independent phosphoglycerate mutase	13	0.816149	0.000163232	Down
Biological Process	GO:0006950	3	response to stress	2.98	0.0352297	sll0896	Holliday juction resolvase RuvC	1	0.796963	0.012996	Down
Biological Process	GO:0006950	3	response to stress	2.98	0.0352297	sll0754	ribosome binding factor A	7	0.825081	0.00228797	Down
Biological Process	GO:0051704	2	multi-organism process	10.37	0.000323125	sll0681	phosphate transport system permease protein PstC homolog	3	0.509139	0.0108182	Down
Biological Process	GO:0006950	3	response to stress	2.98	0.0352297	sll0247	iron-stress chlorophyll-binding protein, homologous to psbC (CP43)	3	0.653217	0.00314665	Down
Biological Process	GO:0050896	2	response to stimulus	2.54	0.0327023	sll1536	molybdopterin biosynthesis MoeB protein	13	0.816925	0.00571323	Down
Biological Process	GO:0050896	2	response to stimulus	2.54	0.0327023	sll0896	Holliday juction resolvase RuvC	1	0.796963	0.012996	Down
Biological Process	GO:0050896	2	response to stimulus	2.54	0.0327023	sll0754	ribosome binding factor A	7	0.825081	0.00228797	Down
Biological Process	GO:0050896	2	response to stimulus	2.54	0.0327023	sll0247	iron-stress chlorophyll-binding protein, homologous to psbC (CP43)	3	0.653217	0.00314665	Down
Biological Process	GO:0051704	2	multi-organism process	10.37	0.000323125	slr1248	phosphate transport system permease protein PstC homolog	3	0.559516	0.000163714	Down
Biological Process	GO:0051704	2	multi-organism process	10.37	0.000323125	sll1536	molybdopterin biosynthesis MoeB protein	13	0.816925	0.00571323	Down
Biological Process	GO:0050896	2	response to stimulus	2.54	0.0327023	slr1945	2,3-bisphosphoglycerate-independent phosphoglycerate mutase	13	0.816149	0.000163232	Down
Molecular Function	GO:0016301	5	kinase activity	3.06	0.134346	slr1672	glycerol kinase	11	0.397686	0.000187582	Down
Molecular Function	GO:0016301	5	kinase activity	3.06	0.134346	slr1420	probable sugar kinase	3	0.267051	0.000217162	Down
