# Supplementary material for: Proteomic analysis of the regulatory networks of ClpX in a model cyanobacterium Synechocystis sp. PCC 6803
Source: Front Plant Sci. 2022 Sep 29;13:994056. doi: 10.3389/fpls.2022.994056 (PMC9560874; doi:10.3389/fpls.2022.994056)
Supplement: Supplementary file 10 [file Table_9.xlsx]

## Sheet: Table S9.
Table S9. Functional Interaction Networks of ClpX-regulated proteins.
node1	node1_symbols	node2	node2_symbols	combined_score
slr0798	ziaA	slr1753	-	0.828
slr1260	-	sll1949	-	0.467
slr0553	-	slr1882	ribF	0.667
sll0290	ppk	sll1552	-	0.537
sll1807	rplX	sll1096	rpsL	0.999
sll1807	rplX	sll1802	rplB	0.999
slr0869	-	sll1552	-	0.499
slr0552	-	slr1114	-	0.58
slr0552	-	sll0470	-	0.476
slr0552	-	slr0553	-	0.602
slr0552	-	slr1774	-	0.558
slr1535	-	slr0607	-	0.431
sll0834	bicA	slr1512	-	0.813
ssl2598	psbH	sll0247	isiA	0.891
slr1272	-	slr0601	-	0.482
slr1272	-	slr0937	-	0.534
slr1272	-	sll0319	-	0.55
slr1270	-	slr1272	-	0.695
slr1270	-	sll0141	-	0.641
sll1802	rplB	slr1854	-	0.41
sll1802	rplB	sll1096	rpsL	0.999
slr1369	cdsA	sll0247	isiA	0.606
slr1774	-	sll1885	-	0.475
slr1774	-	slr1403	-	0.508
sll1885	-	slr0601	-	0.459
sll1885	-	slr0937	-	0.761
sll1736	-	slr1160	-	0.436
sll1736	-	sll1350	-	0.691
sll1736	-	sll0449	-	0.416
sll0224	-	sll1296	-	0.61
slr1114	-	sll1885	-	0.436
slr1114	-	slr1841	-	0.472
slr1114	-	slr0937	-	0.639
slr1114	-	ssl1911	-	0.42
slr1114	-	slr0601	-	0.451
slr1114	-	slr1753	-	0.55
sll0470	-	sll1736	-	0.582
sll0470	-	slr1841	-	0.651
sll0470	-	slr1114	-	0.544
sll0470	-	slr1160	-	0.515
sll0470	-	slr0937	-	0.768
slr1672	glpK	slr1420	-	0.473
slr1672	glpK	sll0449	-	0.414
sll0471	-	sll0470	-	0.826
sll0471	-	sll1736	-	0.447
slr0793	-	slr1270	-	0.539
slr0793	-	sll1949	-	0.403
slr0793	-	slr1260	-	0.544
sll1220	-	sll1330	-	0.531
slr0105	-	sll1296	-	0.424
slr1753	-	slr0937	-	0.724
slr1753	-	slr1260	-	0.577
slr1753	-	sll1885	-	0.681
slr1753	-	slr1661	-	0.883
sll0595	-	slr1535	-	0.788
sll0595	-	slr1485	-	0.786
sll0767	rplT	sll1096	rpsL	0.998
sll0767	rplT	sll1802	rplB	0.999
sll0767	rplT	sll1817	rps11	0.999
sll0767	rplT	ssl1426	rpmI	0.999
sll0767	rplT	sll1807	rplX	0.999
slr1945	yibO	sll0449	-	0.56
sll0723	-	sll0721	-	0.78
slr1485	-	slr1535	-	0.789
sll1817	rps11	sll1802	rplB	0.999
sll1817	rps11	sll1096	rpsL	0.999
sll1817	rps11	sll1807	rplX	0.999
slr1841	-	slr1160	-	0.549
slr1841	-	slr1270	-	0.911
slr1841	-	sll1350	-	0.444
sll1280	-	slr0869	-	0.435
slr0420	-	slr1260	-	0.607
slr0420	-	ssl1911	-	0.462
slr0420	-	sll0470	-	0.682
slr0420	-	slr0937	-	0.508
slr0420	-	sll0471	-	0.458
slr0420	-	slr1403	-	0.593
slr0420	-	slr1753	-	0.458
slr0420	-	slr1856	-	0.605
slr0420	-	slr1841	-	0.459
slr0420	-	slr1114	-	0.591
ssl1426	rpmI	sll1817	rps11	0.998
ssl1426	rpmI	sll1802	rplB	0.996
ssl1426	rpmI	sll1096	rpsL	0.998
ssl1426	rpmI	sll0754	rbfA	0.544
ssl1426	rpmI	sll1807	rplX	0.998
sll0223	ndhB	sll1220	-	0.958
sll0223	ndhB	sll1802	rplB	0.54
sll0223	ndhB	sll1096	rpsL	0.832
sll0533	tig	sll1807	rplX	0.949
sll0533	tig	sll0754	rbfA	0.514
sll0533	tig	slr1945	yibO	0.406
sll0533	tig	ssl1426	rpmI	0.41
sll0533	tig	slr1672	glpK	0.517
sll0533	tig	sll1096	rpsL	0.576
sll0533	tig	sll1802	rplB	0.682
slr0364	-	slr1661	-	0.818
slr0364	-	slr0366	-	0.984
slr0364	-	sll0723	-	0.476
slr0364	-	slr1753	-	0.419
slr0364	-	sll0654	-	0.838
slr0364	-	sll0721	-	0.476
slr0364	-	slr1403	-	0.485
slr1855	-	slr1856	-	0.965
slr1855	-	slr1860	ICFG	0.747
slr1855	-	slr1859	-	0.928
slr1854	-	slr1856	-	0.921
slr1854	-	slr1855	-	0.993
slr1854	-	sll1220	-	0.686
slr1854	-	slr1859	-	0.905
slr1854	-	slr1860	ICFG	0.737
sll0689	-	slr1512	-	0.504
sll0689	-	sll0834	bicA	0.475
slr1856	-	slr1859	-	0.838
slr1856	-	slr1860	ICFG	0.97
slr0366	-	slr1403	-	0.919
slr0366	-	slr0937	-	0.78
slr0366	-	slr1272	-	0.459
slr0366	-	slr1114	-	0.443
slr0366	-	sll0721	-	0.913
slr0366	-	sll1220	-	0.869
slr0366	-	sll1885	-	0.834
slr0366	-	sll0654	-	0.955
slr0366	-	slr1270	-	0.754
slr0366	-	slr0601	-	0.476
slr0366	-	sll1293	-	0.451
slr0366	-	slr1753	-	0.973
slr0366	-	slr0793	-	0.408
slr0366	-	sll0723	-	0.901
slr0366	-	slr1415	-	0.408
slr1859	-	slr1860	ICFG	0.987
slr0380	-	slr1661	-	0.775
slr0380	-	slr1260	-	0.424
slr0380	-	sll1552	-	0.4
ssl1911	-	ssr0657	-	0.53
ssl1911	-	sll1736	-	0.423
ssl1911	-	sll1552	-	0.442
slr0601	-	slr0602	-	0.691
sll0684	pstB	sll0679	sphX	0.841
sll0684	pstB	sll0683	pstB	0.93
sll0685	-	slr0366	-	0.541
sll0685	-	sll0684	pstB	0.57
sll0683	pstB	sll0679	sphX	0.939
sll0555	map	sll1807	rplX	0.419
sll0555	map	sll1802	rplB	0.614
slr1204	htrA	slr1854	-	0.592
slr1204	htrA	sll1305	-	0.41
slr1204	htrA	slr1672	glpK	0.665
sll0754	rbfA	sll1096	rpsL	0.441
sll1949	-	sll1885	-	0.472
sll1949	-	slr0937	-	0.431
sll1679	hhoA	sll1305	-	0.41
sll1679	hhoA	slr1672	glpK	0.665
slr1403	-	slr1260	-	0.712
slr0937	-	slr0601	-	0.697
ssl2559	-	sll1296	-	0.555
sll0654	-	sll0723	-	0.432
sll0745	pfkA	sll0744	-	0.594
sll0745	pfkA	slr1945	yibO	0.473
sll0745	pfkA	sll1330	-	0.515
sll1296	-	slr1860	ICFG	0.97
sll1296	-	sll1882	-	0.477
sll1296	-	sll0141	-	0.654
sll1296	-	sll1590	-	0.629
sll1296	-	sll1293	-	0.999
sll1296	-	sll1885	-	0.737
sll1296	-	sll1330	-	0.99
sll1296	-	slr1859	-	0.77
sll1296	-	slr1856	-	0.77
sll1293	-	sll1949	-	0.453
sll1293	-	sll1885	-	0.719
slr1852	-	slr1854	-	0.712
slr1852	-	slr1856	-	0.548
slr1852	-	slr1853	-	0.869
slr1852	-	slr1855	-	0.574
slr1852	-	slr1859	-	0.439
sll1783	-	slr1853	-	0.431
sll1783	-	slr0666	-	0.851
slr1853	-	slr1856	-	0.857
slr1853	-	slr1855	-	0.89
slr1853	-	slr1854	-	0.925
slr1853	-	slr1859	-	0.87
slr1853	-	slr1860	ICFG	0.6
sll1305	-	sll1785	-	0.792
sll1305	-	sll1783	-	0.544
sll1305	-	sll1784	-	0.559
sll1305	-	slr1853	-	0.632
sll1305	-	sll1304	-	0.871
slr1160	-	sll0319	-	0.851
sll1785	-	sll1784	-	0.5
sll1785	-	sll1783	-	0.958
sll1304	-	sll1785	-	0.85
sll1304	-	sll1783	-	0.438
sll1304	-	slr1853	-	0.426
sll1304	-	sll1784	-	0.464
sll1304	-	slr1420	-	0.502
sll1784	-	sll1783	-	0.771
