# Supplementary material for: Proteomic analysis of the regulatory networks of ClpX in a model cyanobacterium Synechocystis sp. PCC 6803
Source: Front Plant Sci. 2022 Sep 29;13:994056. doi: 10.3389/fpls.2022.994056 (PMC9560874; doi:10.3389/fpls.2022.994056)
Supplement: Supplementary file 11 [file Table_10.xlsx]

## Sheet: Table S10A
Table S10A. Functional classification of annotated DEPs in Synechocystis sp. PCC 6803
Protein ID	Description	Fold Change	p-value	Regulatory Type	Gene Name	Functional Category
slr0553	Dephospho-CoA kinase	1.25944	0.00112341	up-regulated	coaE	metabolic pathways
slr0550	dihydrodipicolinate synthase	1.33597	0.0101986	up-regulated	dapA	metabolic pathways
slr1608	putative glucose dehydrogenase-B,oxidoreductase activity	1.43691	0.000351629	up-regulated	slr1608	metabolic pathways
slr1369	phosphatidate cytidylyltransferase	1.23817	0.00233829	up-regulated	cdsA	metabolic pathways
sll0223	NADH dehydrogenase subunit 2	1.2651	0.00446369	up-regulated	ndhB	metabolic pathways
ssl2598	photosystem II PsbH protein	2.13086	0.00129454	up-regulated	psbH	metabolic pathways
slr1882	riboflavin kinase/FMN adenylyltransferase	1.21063	0.0322916	up-regulated	ribF	metabolic pathways
ssr1789	High light inducible protein	1.4403	0.00162228	up-regulated	hliA	metabolic pathways
sll1536	molybdopterin biosynthesis MoeB protein	0.816925	0.00571323	down-regulated	moeB	metabolic pathways
slr1945	2,3-bisphosphoglycerate-independent phosphoglycerate mutase	0.816149	0.000163232	down-regulated	gpmI	metabolic pathways
slr1672	glycerol kinase	0.397686	0.000187582	down-regulated	glpK	metabolic pathways
slr1857	isoamylase	0.772232	0.00369216	down-regulated	glgX	metabolic pathways
slr1860	carbon metabolisms regulatory protein IcfG	0.807495	0.00342716	down-regulated	icfG	metabolic pathways
slr0983	glucose-1-phosphate cytidylyltransferase	0.813957	0.00824476	down-regulated	rfbF	metabolic pathways
slr1853	carboxymuconolactone decarboxylase	0.639225	0.000569778	down-regulated	slr1853	metabolic pathways
sll1220	putative diaphorase subunit of the bidirectional hydrogenase	0.803292	0.00185426	down-regulated	sll1220	metabolic pathways
slr1077	probable glycosyltransferase	0.759132	0.0129974	down-regulated	slr1077	metabolic pathways
sll0745	phosphofructokinase	0.822766	0.0340219	down-regulated	pfkA2	metabolic pathways
slr1420	phosphotransferase activity,carbohydrate kinase	0.267051	0.000217162	down-regulated	slr1420	metabolic pathways
ssl2296	pterin-4a-carbinolamine dehydratase	0.752725	0.0231188	down-regulated	ssl2296	metabolic pathways
sll0450	cytochrome b subunit of nitric oxide reductase	0.764289	0.0117905	down-regulated	norB	metabolic pathways
sll1305	probable hydrolase	0.288281	0.000117475	down-regulated	sll1305	metabolic pathways
slr0288	glutamate--ammonia ligase	0.826227	0.000485587	down-regulated	glnN	metabolic pathways
ssl1911	glutamine synthetase inactivating factor IF7	0.559212	0.000967809	down-regulated	ssl1911	metabolic pathways
sll0290	polyphosphate kinase	0.724997	0.00107202	down-regulated	ppk	metabolic pathways
ssl2559	ferredoxin,iron-sulfur cluster binding	0.706803	0.000606462	down-regulated	ssl2559	metabolic pathways
sll1182	cytochrome b6-f complex alternative iron-sulfur subunit	0.780029	0.0126917	down-regulated	petC	metabolic pathways
sll0744	de novo' UMP biosynthetic process	0.831862	0.0256533	down-regulated	sll0744	metabolic pathways
sll0654	alkaline phosphatase	0.638796	0.000484645	down-regulated	sll0654	metabolic pathways
sll0689	Na+/H+ antiporter	1.228	0.000538255	up-regulated	nhaS3	ABC transporters and two-component signal transduction
sll0834	low affinity sulfate transporter	1.24753	0.00190778	up-regulated	bicA	ABC transporters and two-component signal transduction
slr0401	periplasmic polyamine-binding protein of ABC transporter	1.21714	3.10251e-05	up-regulated	slr0401	ABC transporters and two-component signal transduction
slr1512	sodium-dependent bicarbonate transporter	1.24406	0.0299289	up-regulated	slr1512	ABC transporters and two-component signal transduction
sll1598	Mn transporter MntC	1.27496	0.0206485	up-regulated	mntC	ABC transporters and two-component signal transduction
slr0327	iron(III) ABC transporter	1.28356	0.027728	up-regulated	hitB	ABC transporters and two-component signal transduction
sll0224	amino-acid ABC transporter binding protein	1.20183	0.000749578	up-regulated	sll0224	ABC transporters and two-component signal transduction
sll1002	hypothetical protein YCF22	1.22459	0.0018251	up-regulated	ycf22	ABC transporters and two-component signal transduction
slr1227	chloroplastic outer envelope membrane protein homolog	1.50898	1.78994e-05	up-regulated	IAP75	ABC transporters and two-component signal transduction
slr0793	cation efflux system protein involved in nickel and cobalt tolerance	2.23347	0.0114542	up-regulated	rppA	ABC transporters and two-component signal transduction
slr1270	periplasmic protein	1.28294	0.00683402	up-regulated	slr1270	ABC transporters and two-component signal transduction
sll0319	periplasmic protein	1.29452	0.0034437	up-regulated	sll0319	ABC transporters and two-component signal transduction
slr1272	probable porin;major outer membrane protein	1.58459	6.05313e-06	up-regulated	slr1272	ABC transporters and two-component signal transduction
slr1841	probable porin; major outer membrane protein	1.3748	2.05217e-05	up-regulated	slr1841	ABC transporters and two-component signal transduction
slr1485	putative phosphatidylinositol phosphate kinase	1.39325	0.00133232	up-regulated	slr1485	ABC transporters and two-component signal transduction
sll1294	methyl-accepting chemotaxis protein	0.774466	0.00454732	down-regulated	pilJ	ABC transporters and two-component signal transduction
sll0679	periplasmic phosphate-binding protein of ABC transporter	0.558463	3.88681e-05	down-regulated	sphX	ABC transporters and two-component signal transduction
sll0680	phosphate-binding periplasmic protein precursor (PBP)	0.398914	0.000106931	down-regulated	pstS	ABC transporters and two-component signal transduction
sll0681	phosphate transport system permease protein PstC homolog	0.509139	0.0108182	down-regulated	pstC	ABC transporters and two-component signal transduction
sll0683	phosphate transport ATP-binding protein PstB homolog	0.289375	0.000437045	down-regulated	pstB1	ABC transporters and two-component signal transduction
slr1248	phosphate transport system permease protein PstC homolog	0.559516	0.000163714	down-regulated	pstC	ABC transporters and two-component signal transduction
slr1247	phosphate-binding periplasmic protein precursor (PBP)	0.471018	7.14659e-05	down-regulated	pstS	ABC transporters and two-component signal transduction
slr0798	zinc-transporting P-type ATPase	0.643713	0.00287913	down-regulated	ziaA	ABC transporters and two-component signal transduction
sll0684	phosphate transport ATP-binding protein PstB homolog	0.379579	0.000951086	down-regulated	pstB2	ABC transporters and two-component signal transduction
sll0247	iron-stress chlorophyll-binding protein	0.653217	0.00314665	down-regulated	isiA	ABC transporters and two-component signal transduction
sll0723	calcium ion binding	0.756191	4.32393e-06	down-regulated	sll0723	ABC transporters and two-component signal transduction
slr0753	arsenite transmembrane transporter activity	0.624296	0.0101118	down-regulated	slr0753	ABC transporters and two-component signal transduction
slr2016	type 4 pilin-like protein, essential for motility	0.750224	4.73048e-05	down-regulated	slr2016	ABC transporters and two-component signal transduction
sll1785	iron uptake porin	0.822347	0.0037748	down-regulated	sll1785	ABC transporters and two-component signal transduction
sll1590	two-component sensor histidine kinase	0.687388	0.0276518	down-regulated	sll1590	ABC transporters and two-component signal transduction
sll1296	two-component hybrid sensor and regulator	0.804367	0.0062174	down-regulated	sll1296	ABC transporters and two-component signal transduction
sll1330	two-component system response regulator OmpR subfamily	0.750973	0.00751941	down-regulated	sll1330	ABC transporters and two-component signal transduction
slr1856	phosphoprotein substrate of icfG gene cluster	0.817374	0.000490653	down-regulated	slr1856	ABC transporters and two-component signal transduction
slr1859	anti-sigma f factor antagonist	0.666863	0.000244062	down-regulated	slr1859	ABC transporters and two-component signal transduction
sll1802	50S ribosomal protein L2	1.22687	0.00476438	up-regulated	rplB	regulation of gene expression and protein degradation
sll1807	50S ribosomal protein L24	1.76663	0.000260519	up-regulated	rplX	regulation of gene expression and protein degradation
sll1817	30S ribosomal protein S11	1.27845	0.0124393	up-regulated	rpsK	regulation of gene expression and protein degradation
sll0767	50S ribosomal protein L20	1.45848	0.000737967	up-regulated	rplT	regulation of gene expression and protein degradation
sll1096	30S ribosomal protein S12	1.31906	0.0189003	up-regulated	rpsL	regulation of gene expression and protein degradation
ssl1426	50S ribosomal protein L35	1.34871	0.00372151	up-regulated	rpmI	regulation of gene expression and protein degradation
sll1679	periplasmic protease HhoA	1.23629	0.00196102	up-regulated	hhoA	regulation of gene expression and protein degradation
slr1331	periplasmic processing protease	1.25894	0.00274974	up-regulated	ymxG	regulation of gene expression and protein degradation
slr1204	protease	1.26635	0.0035955	up-regulated	htrA	regulation of gene expression and protein degradation
sll0555	methionine aminopeptidase	1.24059	0.0121005	up-regulated	sll0555	regulation of gene expression and protein degradation
sll0777	putative carboxypeptidase	1.38354	0.002933	up-regulated	sll0777	regulation of gene expression and protein degradation
sll0533	trigger factor	1.3008	0.00133717	up-regulated	tig	regulation of gene expression and protein degradation
slr0955	probable tRNA/rRNA methyltransferase	1.50199	6.51997e-05	up-regulated	slr0955	regulation of gene expression and protein degradation
slr1564	group 3 RNA polymerase sigma factor	1.28199	0.00607912	up-regulated	rpoF	regulation of gene expression and protein degradation
sll0754	ribosome binding factor A	0.825081	0.00228797	down-regulated	rbfA	regulation of gene expression and protein degradation
sll0002	penicillin-binding protein 1A	1.22988	0.0233249	up-regulated	ponA	defense mechanisms
slr0646	penicillin-binding protein 4	1.44099	3.23843e-05	up-regulated	dacB	defense mechanisms
slr0121	beta-lactamase activity	1.26925	0.0128203	up-regulated	slr0121	defense mechanisms
slr0319	beta-lactamase	1.43094	0.0064979	up-regulated	blaOXA-3	defense mechanisms
sll0656	extracellular nuclease	0.72507	0.00766342	down-regulated	sll0656	defense mechanisms

## Sheet: Table S10B
Table S10B. Functional classification of hypothetical/unknown DEPs in Synechocystis sp. PCC 6803
Protein ID	Description	Fold Change	p-value	Regulatory Typpe	Gene Name	Identity	Homologous species	Functional Category
sll0471	FAD-dependent oxidoreductase	1.23549	0.0319783	up-regulated	sll0471	0.9927	Synechocystis sp. CACIAM 05	metabolic pathways
sll0208	Aldehyde decarbonylase(deformylating)	1.22467	0.00850761	up-regulated	sll0208	0.9957	Synechocystis sp. CACIAM 05	metabolic pathways
slr0869	dynamin-like GTPase family protein	1.23568	0.000413031	up-regulated	slr0869	0.9828	Synechocystis salina	metabolic pathways
slr0105	ParA family protein	1.23155	0.000901095	up-regulated	slr0105	0.8766	Synechocystis sp. PCC 6714	metabolic pathways
slr0937	unknown protein	1.2251	0.0231603	up-regulated	slr0937			metabolic pathways
slr1855	AGE family epimerase/isomerase	0.795026	0.000381646	down-regulated	slr1855	99.84%	Synechocystis sp. PCC 6803	metabolic pathways
sll1304	sugar phosphate isomerase/epimerase	0.776521	0.0295305	down-regulated	sll1304	98.26%	Synechocystis sp. CACIAM 05	metabolic pathways
slr1407	cupin domain-containing protein	0.735506	0.00169452	down-regulated	slr1407	0.3333	Scytonema tolypothrichoides	metabolic pathways
slr8022	Cupin domain-containing protein	0.770692	0.0107744	down-regulated	slr8022	0.9273	Synechocystis sp. LEGE 06083	metabolic pathways
sll1784	periplasmic protein	0.811738	0.00879797	down-regulated	sll1784			metabolic pathways
slr6074	phospholipase D-like domain-containing protein	1.38681	0.00029997	up-regulated	slr6074	0.426	Microcystis aeruginosa	metabolic pathways
slr1854	DJ-1/PfpI family protein,Putative glutamine amidotransferase	0.707808	0.00189443	down-regulated	slr1854	0.9899	Synechocystis sp. CACIAM 05	metabolic pathways
sll0639	Bifunctional oligoribonuclease/PAP phosphatase NrnA	0.787756	0.0114136	down-regulated	sll0639	0.9376	Synechocystis sp. CACIAM 05	metabolic pathways
sll0783	MSMEG_0572 family nitrogen starvation response protein	0.636073	0.000245058	down-regulated	sll0783	0.9875	Synechocystis sp. PCC 6714	metabolic pathways
sll0932	permease	1.25454	0.00365233	up-regulated	sll0932	0.9941	Synechocystis sp. CACIAM 05	ABC transporters and two-component signal transduction
sll0141	efflux RND transporter periplasmic adaptor subunit	1.33795	0.000802427	up-regulated	sll0141	0.9422	Synechocystis sp. PCC 6714	ABC transporters and two-component signal transduction
slr1919	AarF/ABC1/UbiB kinase family protein	1.32485	0.00474564	up-regulated	slr1919	0.9982	Synechocystis sp. CACIAM 05	ABC transporters and two-component signal transduction
sll0005	AarF/ABC1/UbiB kinase family protein	1.35933	0.00573425	up-regulated	sll0005	0.9912	Synechocystis sp. CACIAM 05	ABC transporters and two-component signal transduction
sll1009	calcium-binding protein	2.41048	0.000215145	up-regulated	frpC	1	unclassified Synechocystis	ABC transporters and two-component signal transduction
sll1882	Tetratricopeptide repeat protein	1.28147	0.0414477	up-regulated	sll1882	0.9889	Synechocystissp. CACIAM05	ABC transporters and two-component signal transduction
sll7070	integral component of membrane	1.30053	0.0397902	up-regulated	sll7070	0.4818	Geminocystissp. GBBB08	ABC transporters and two-component signal transduction
slr1661	ShlB/FhaC/HecB family hemolysin secretion/activation protein	1.33317	0.0158527	up-regulated	slr1661	0.9954	Synechocystis sp. CACIAM 05	ABC transporters and two-component signal transduction
slr0364	Ig-like domain-containing protein	1.3383	0.00177759	up-regulated	slr0364	1	Synechocystis sp. PCC 6803	ABC transporters and two-component signal transduction
slr1114	ABC transporter permease	0.688728	0.0011468	down-regulated	slr1114	0.4092	Crocosphaera watsonii	ABC transporters and two-component signal transduction
slr0607	cyclic nucleotide-binding protein	0.762804	0.0211703	down-regulated	slr0607	1	Synechocystis sp. PCC 6803	ABC transporters and two-component signal transduction
sll1293	chemotaxis protein CheW	0.659729	0.0247411	down-regulated	sll1293	0.9806	Synechocystis sp. CACIAM 05	ABC transporters and two-component signal transduction
sll1280	M48 family metallopeptidase	1.43419	5.97276e-05	up-regulated	sll1280	0.9703	Synechocystis sp. PCC 7338	regulation of gene expression and protein degradation
slr1753	CHAT domain-containing protein	1.22936	0.00150319	up-regulated	slr1753	1	Synechocystis sp. FACHB-898	regulation of gene expression and protein degradation
slr6071	AAA family ATPase	1.40204	0.000383324	up-regulated	slr6071	1	Synechocystis sp. PCC 6803	regulation of gene expression and protein degradation
slr6073	AAA family ATPase	1.29685	0.00618176	up-regulated	slr6073	0.3207	Crinalium epipsammum	regulation of gene expression and protein degradation
slr0380	CHAT domain-containing protein	0.776543	0.00286416	down-regulated	slr0380	1	Synechocystis sp. PCC 6803	regulation of gene expression and protein degradation
sll0685	Thioredoxin family protein,Negative regulator of GroEL	0.630198	0.000238557	down-regulated	sll0685	0.9877	Synechocystis sp. CACIAM 05	regulation of gene expression and protein degradation
sll1783	Antibiotic biosynthesis monooxygenase	0.760006	0.00215697	down-regulated	sll1783	0.9864	Synechocystis sp. CACIAM 05	defense mechanisms
sll5075	VOC family protein	0.831144	0.0302671	down-regulated	sll5075	0.964	Synechocystis salina	defense mechanisms
slr1535	Glycosyl hydrolase family 57	0.561514	5.65985e-05	down-regulated	slr1535	0.9755	Synechocystis sp. CACIAM 05	defense mechanisms
slr1403	FG-GAP repeat protein	0.671315	0.00198977	down-regulated	slr1403	1	Synechocystis sp. PCC 6803	defense mechanisms
sll0721	Leukotoxin LtA	0.807853	0.00158411	down-regulated	sll0721	1	unclassified Synechocystis	defense mechanisms
sll1552	GNAT family N-acetyltransferase	0.456577	8.49808e-05	down-regulated	sll1552	0.8161	Synechocystis sp. PCC 7339	defense mechanisms
sll7067	unknown protein	1.23778	0.000381994	up-regulated	sll7067			defense mechanisms
sll7064	CRISPR-associated protein Csx19	1.26154	0.00431756	up-regulated	sll7064	1	Synechocystis sp. PCC 6803	defense mechanisms
sll7087	CRISPR-associated RAMP Cmr4	1.27431	0.000149997	up-regulated	sll7087	0.9179	Synechocystis sp. PCC 6714	defense mechanisms
sll7089	type III-B CRISPR module-associated protein Cmr3	1.47611	0.000583576	up-regulated	sll7089	96.46%	Synechocystis sp. PCC 6714	defense mechanisms
slr7013	Type I-D CRISPR-associated protein Cas5/Csc1	1.26281	0.0258505	up-regulated	slr7013	100.00%	unclassified Synechocystis	defense mechanisms
sll7090	DUF3692 domain-containing protein	1.26662	0.000187022	up-regulated	sll7090	0.9448	Synechocystis sp. PCC 6714	defense mechanisms
sll7066	type III-B CRISPR-associated protein Cas10/Cmr2	1.21633	0.02294	up-regulated	sll7066	0.5585	Synechococcus sp. NKBG15041c	defense mechanisms
sll7063	TIGR03986 family CRISPR-associated RAMP protein	1.35908	0.00206125	up-regulated	sll7063	0.5647	Synechococcus sp. NKBG042902	defense mechanisms
sll7085	RAMP superfamily CRISPR-associated protein	1.33493	0.000212877	up-regulated	sll7085	0.7539	Synechocystis sp. PCC 7339	defense mechanisms
sll7065	RAMP superfamily CRISPR-associated protein	1.21232	0.0154927	up-regulated	sll7065	0.5623	Synechococcus sp. NKBG15041c	defense mechanisms
sll1193	HNH endonuclease	0.80424	0.00451862	down-regulated	sll1193	0.9939	Synechocystis	defense mechanisms
slr1870	NYN domain-containing protein	1.21071	0.0145055	up-regulated	slr1870	99.60%	Synechocystis sp. CACIAM 05	hypothetical/unknown proteins
sll1350	pentapeptide repeat-containing protein	1.2987	0.00653495	up-regulated	sll1350	0.9899	Synechocystis sp. CACIAM 05	hypothetical/unknown proteins
sll1378	DUF1838 domain-containing protein	1.81874	9.24473e-05	up-regulated	sll1378	1	Synechocystis sp. PCC 6803	hypothetical/unknown proteins
slr0770	DUF433 domain-containing protein	1.24449	0.0154643	up-regulated	slr0770	0.9623	Synechocystis salina	hypothetical/unknown proteins
slr1186	DUF2214 family protein	1.27175	0.0106185	up-regulated	slr1186	0.9459	Synechocystis salina LEGE 06155	hypothetical/unknown proteins
slr1415	DUF4350 domain-containing protein	1.27457	0.0103551	up-regulated	slr1415	1	Synechocystis sp. PCC 6803	hypothetical/unknown proteins
slr0514	PepSY domain-containing protein	1.20978	0.0106962	up-regulated	slr0514	0.3663	Microcoleus sp. FACHB-SPT15	hypothetical/unknown proteins
sll0449	formylglycine-generating enzyme family protein	1.24779	3.5539e-05	up-regulated	sll0449	0.3957	Cyanobacteria bacterium WB6_1B_304	hypothetical/unknown proteins
slr1774	DUF6515 family protein	1.27172	0.000220414	up-regulated	slr1774	100.00%	Synechocystis sp. PCC 6803	hypothetical/unknown proteins
sll1736	zinc ribbon domain-containing protein	1.23063	0.0236009	up-regulated	sll1736	0.4683	Microcoleus vaginatus WJT46-NPBG5	hypothetical/unknown proteins
ssl6092	CopG family transcriptional regulator	1.43361	0.00300116	up-regulated	ssl6092	0.4615	Cyanobacteria bacterium FACHB-502	hypothetical/unknown proteins
slr0366	DUF4114 domain-containing protein	1.21849	0.0110209	up-regulated	slr0366	0.9994	Synechocystis sp. PCC 6803	hypothetical/unknown proteins
slr6039	DUF305 domain-containing protein	0.782808	0.00717834	down-regulated	slr6039	100.00%	Synechocystis sp. PCC 6803	hypothetical/unknown proteins
slr1260	DUF3122 domain-containing protein	0.829677	0.0181876	down-regulated	slr1260	0.9209	Synechocystis sp. CACIAM 05	hypothetical/unknown proteins
sll1118	YbjQ family protein	0.743966	0.000944384	down-regulated	sll1118	0.9722	Synechocystis salina	hypothetical/unknown proteins
slr2030	TIGR03279 family radical SAM protein	0.804896	0.00311518	down-regulated	slr2030	0.9889	Synechocystis sp. CACIAM 05	hypothetical/unknown proteins
slr1851	Pentapeptide repeat-containing protein	0.828784	0.0232887	down-regulated	slr1851	0.858	Synechocystis sp. FACHB-383	hypothetical/unknown proteins
sll0470	DUF2808 domain-containing protein	0.800057	0.0117278	down-regulated	sll0470	0.9946	Synechocystis sp. CACIAM 05	hypothetical/unknown proteins
slr1852	EthD domain-containing protein	0.694024	0.00818314	down-regulated	slr1852	0.7872	Mastigocoleus testarum	hypothetical/unknown proteins
slr1681	PAN/Apple domain-containing protein	0.80876	0.00245477	down-regulated	slr1681	0.3312	Thiorhodococcus mannitoliphagus	hypothetical/unknown proteins
ssr0657	DUF6439 family protein	0.741629	0.00189122	down-regulated	ssr0657	0.9691	Synechocystis salina	hypothetical/unknown proteins
slr1160	periplasmic protein	1.222	0.000133485	up-regulated	slr1160			hypothetical/unknown proteins
slr0601	hypothetical protein	1.29125	0.00953232	up-regulated	slr0601			hypothetical/unknown proteins
slr6075	unknown protein	1.27641	0.00011767	up-regulated	slr6075			hypothetical/unknown proteins
slr1788	unknown protein	1.30346	0.000122909	up-regulated	slr1788			hypothetical/unknown proteins
slr0552	hypothetical protein	1.35738	5.61403e-05	up-regulated	slr0552			hypothetical/unknown proteins
slr0420	hypothetical protein	1.21862	0.00223254	up-regulated	slr0420			hypothetical/unknown proteins
sll1949	unknown protein	1.46734	0.00105074	up-regulated	sll1949			hypothetical/unknown proteins
sll1885	unknown protein	1.36532	0.000252241	up-regulated	sll1885			hypothetical/unknown proteins
slr0294	unknown protein	1.48135	0.0143184	up-regulated	slr0294			hypothetical/unknown proteins
sll7086	unknown protein	1.36	0.000408572	up-regulated	sll7086			hypothetical/unknown proteins
slr5111	unknown protein	1.58316	0.00159399	up-regulated	slr5111			hypothetical/unknown proteins
ssr1951	hypothetical protein	1.20343	0.0165022	up-regulated	ssr1951			hypothetical/unknown proteins
slr0666	unknown protein	0.728869	0.000354285	down-regulated	slr0666			hypothetical/unknown proteins
slr1576	unknown protein	0.783522	0.000202329	down-regulated	slr1576			hypothetical/unknown proteins
slr0602	unknown protein	0.712408	0.00135789	down-regulated	slr0602			hypothetical/unknown proteins
slr1150	unknown protein	0.815636	0.0365301	down-regulated	slr1150			hypothetical/unknown proteins
sll0595	unknown protein	0.80606	0.00292305	down-regulated	sll0595			hypothetical/unknown proteins
slr1396	unknown protein	0.587321	0.0416602	down-regulated	slr1396			hypothetical/unknown proteins
ssr1407	hypothetical protein	0.760368	0.0166232	down-regulated	ssr1407			hypothetical/unknown proteins
