# Supplementary material for: Proteomic analysis of the regulatory networks of ClpX in a model cyanobacterium Synechocystis sp. PCC 6803
Source: Front Plant Sci. 2022 Sep 29;13:994056. doi: 10.3389/fpls.2022.994056 (PMC9560874; doi:10.3389/fpls.2022.994056)
Supplement: Supplementary file 12 [file Table_11.xlsx]

## Sheet: Table S11
Table S11. PRM quantified results.
Protein ID	Protein Description	Fold Change	P-Value	Ratio(ClpX/WT)	p-Value	Regulated type
sll0224	amino-acid ABC transporter binding protein	2.3286	1.3045e-06	1.20183	0.000749578	up-regulated
slr0793	cation efflux system protein involved in nickel and cobalt tolerance	3.3246	4.14603e-05	2.23347	0.0114542	up-regulated
slr1247	phosphate-binding periplasmic protein precursor (PBP)	0.5003	2.45659e-05	0.471018	7.14659e-05	down-regulated
sll0680	phosphate-binding periplasmic protein precursor (PBP)	0.0996	3.491e-07	0.398914	0.000106931	down-regulated
sll0681	phosphate transport system permease protein PstC homolog	0.023	9.9106e-07	0.509139	0.0108182	down-regulated
sll0683	phosphate transport ATP-binding protein PstB homolog	0.0392	1.14842e-07	0.289375	0.000437045	down-regulated
sll0684	phosphate transport ATP-binding protein PstB homolog	0.1759	1.18969e-05	0.379579	0.000951086	down-regulated
sll0247	iron-stress chlorophyll-binding protein	0.0002	4.11056e-06	0.653217	0.00314665	down-regulated
slr0550	dihydrodipicolinate synthase	2.2518	6.55545e-06	1.33597	0.0101986	up-regulated
sll0745	phosphofructokinase	0.686	0.000830983	0.822766	0.0340219	down-regulated
slr1672	glycerol kinase	0.1059	9.85391e-10	0.397686	0.000187582	down-regulated
sll0290	polyphosphate kinase	0.721	9.9824e-06	0.724997	0.00107202	down-regulated
slr1853	carboxymuconolactone decarboxylase	0.6856	0.00447325	0.639225	0.000569778	down-regulated
slr1857	isoamylase	0.607	9.81201e-05	0.772232	0.00369216	down-regulated
slr0955	probable tRNA/rRNA methyltransferase	1.5629	0.000619078	1.50199	6.51997e-05	up-regulated
sll0533	trigger factor	2.4456	0.000586348	1.3008	0.00133717	up-regulated
sll1802	50S ribosomal protein L2	1.3855	0.000444301	1.22687	0.00476438	up-regulated
sll1807	50S ribosomal protein L24	1.9596	0.000281133	1.76663	0.000260519	up-regulated
sll1817	30S ribosomal protein S11	1.2808	0.023147	1.27845	0.0124393	up-regulated
ssl1426	50S ribosomal protein L35	1.2597	0.033155	1.34871	0.00372151	up-regulated
sll1679	periplasmic protease HhoA	2.1813	6.48323e-05	1.23629	0.00196102	up-regulated
slr1331	periplasmic processing protease	3.2272	1.34975e-06	1.25894	0.00274974	up-regulated
slr0319	beta-lactamase	2.2728	2.48452e-07	1.43094	0.0064979	up-regulated
